# Supplementary material for: Research on the Treatment of Colorectal Cancer Based on Network Pharmacology and Molecular Docking
Source: Research Square preprint supplement (doi:10.21203/rs.3.rs-263797/v2), 2021-03-25
Supplement: Supplementary file 1 [file c996e7980c0e0aac90760093.docx]

Genecard

|  | Description | Category | Gifts | GC Id | Relevance score |
| --- | --- | --- | --- | --- | --- |
| BRCA2 | BRCA2 DNA Repair Associated | Protein Coding | 49 | GC13P032315 | 241.06 |
| BRCA1 | BRCA1 DNA Repair Associate, | Protein Coding | 50 | GC17M043044 | 226.55 |
| MSH6 | MutS Homolog 6 | Protein Coding | 50 | GC02P047695 | 214.99 |
| APC | APC Regulator Of WNT Signaling Pathway | Protein Coding | 48 | GC05P112707 | 212.49 |
| MLH1 | MutL Homolog 1 | Protein Coding | 48 | GC03P036993 | 197.04 |
| POLE | DNA Polymerase Epsilon, Catalytic Subunit | Protein Coding | 48 | GC12M132624 | 194.57 |
| MSH2 | MutS Homolog 2 | Protein Coding | 48 | GC02P047402 | 191.58 |
| TP53 | Tumor Protein P53 | Protein Coding | 54 | GC17M007661 | 172.53 |
| PMS2 | PMS1 Homolog 2, Mismatch Repair System Component | Protein Coding | 48 | GC07M005973 | 167.67 |
| POLD1 | DNA Polymerase Delta 1, Catalytic Subunit | Protein Coding | 45 | GC19P050385 | 155.32 |
| AXIN2 | Axin 2 | Protein Coding | 48 | GC17M065528 | 147.99 |
| ATM | ATM Serine/Threonine Kinase | Protein Coding | 54 | GC11P108222 | 147.52 |
| CHEK2 | Checkpoint Kinase 2 | Protein Coding | 53 | GC22M028687 | 128.67 |
| CDH1 | Cadherin 1 | Protein Coding | 50 | GC16P068737 | 123.9 |
| NF1 | Neurofibromin 1 | Protein Coding | 48 | GC17P031094 | 111.81 |
| KRAS | KRAS Proto-Oncogene, GTPase | Protein Coding | 51 | GC12M025204 | 110.7 |
| PTEN | Phosphatase And Tensin Homolog | Protein Coding | 52 | GC10P087863 | 108.64 |
| MUTYH | MutY DNA Glycosylase | Protein Coding | 44 | GC01M045329 | 106.29 |
| EGFR | Epidermal Growth Factor Receptor | Protein Coding | 54 | GC07P055019 | 101.69 |
| SMAD4 | SMAD Family Member 4 | Protein Coding | 50 | GC18P051028 | 99.47 |
| BRAF | B-Raf Proto-Oncogene, Serine/Threonine Kinase | Protein Coding | 54 | GC07M140719 | 98.72 |
| PIK3CA | Phosphatidylinositol-4,5-Bisphosphate 3-Kinase Catalytic Subunit Alpha | Protein Coding | 52 | GC03P179148 | 98.66 |
| CDKN2A | Cyclin Dependent Kinase Inhibitor 2A | Protein Coding | 51 | GC09M021967 | 98.53 |
| CTNNB1 | Catenin Beta 1 | Protein Coding | 53 | GC03P041236 | 97.52 |
| STK11 | Serine/Threonine Kinase 11 | Protein Coding | 49 | GC19P001177 | 95.77 |
| RB1 | RB Transcriptional Corepressor 1 | Protein Coding | 49 | GC13P048303 | 88.76 |
| TGFBR2 | Transforming Growth Factor Beta Receptor 2 | Protein Coding | 51 | GC03P030623 | 84.99 |
| ERBB2 | Erb-B2 Receptor Tyrosine Kinase 2 | Protein Coding | 54 | GC17P039687 | 83.76 |
| MYC | MYC Proto-Oncogene, BHLH Transcription Factor | Protein Coding | 51 | GC08P127735 | 83.47 |
| MLH3 | MutL Homolog 3 | Protein Coding | 42 | GC14M075013 | 81.92 |
| EPCAM | Epithelial Cell Adhesion Molecule | Protein Coding | 47 | GC02P047345 | 81.25 |
| CCND1 | Cyclin D1 | Protein Coding | 52 | GC11P069641 | 80.1 |
| RET | Ret Proto-Oncogene | Protein Coding | 53 | GC10P043081 | 79.1 |
| AKT1 | AKT Serine/Threonine Kinase 1 | Protein Coding | 54 | GC14M104769 | 78.96 |
| PALB2 | Partner And Localizer Of BRCA2 | Protein Coding | 43 | GC16M023603 | 77.53 |
| HRAS | HRas Proto-Oncogene, GTPase | Protein Coding | 52 | GC11M000635 | 77.01 |
| VEGFA | Vascular Endothelial Growth Factor A | Protein Coding | 48 | GC06P043770 | 75.14 |
| BRIP1 | BRCA1 Interacting Protein C-Terminal Helicase 1 | Protein Coding | 47 | GC17M061679 | 71.76 |
| MSH3 | MutS Homolog 3 | Protein Coding | 43 | GC05P080654 | 71.27 |
| MET | MET Proto-Oncogene, Receptor Tyrosine Kinase | Protein Coding | 54 | GC07P116672 | 69.51 |
| TERT | Telomerase Reverse Transcriptase | Protein Coding | 51 | GC05M001253 | 68.85 |
| TNF | Tumor Necrosis Factor | Protein Coding | 51 | GC06P047305 | 68.02 |
| CDKN1A | Cyclin Dependent Kinase Inhibitor 1A | Protein Coding | 50 | GC06P047460 | 67.5 |
| EP300 | E1A Binding Protein P300 | Protein Coding | 50 | GC22P041091 | 66.82 |
| IL6 | Interleukin 6 | Protein Coding | 50 | GC07P022765 | 66.27 |
| CDK4 | Cyclin Dependent Kinase 4 | Protein Coding | 54 | GC12M057743 | 64.97 |
| CDKN1B | Cyclin Dependent Kinase Inhibitor 1B | Protein Coding | 48 | GC12P012716 | 64.83 |
| STAT3 | Signal Transducer And Activator Of Transcription 3 | Protein Coding | 52 | GC17M042313 | 64.71 |
| BARD1 | BRCA1 Associated RING Domain 1 | Protein Coding | 46 | GC02M214725 | 63.61 |
| ESR1 | Estrogen Receptor 1 | Protein Coding | 53 | GC06P151656 | 63.32 |
| MDM2 | MDM2 Proto-Oncogene | Protein Coding | 52 | GC12P068808 | 63.19 |
| TGFB1 | Transforming Growth Factor Beta 1 | Protein Coding | 52 | GC19M041301 | 63.17 |
| NRAS | NRAS Proto-Oncogene, GTPase | Protein Coding | 50 | GC01M114704 | 62.34 |
| BAX | BCL2 Associated X, Apoptosis Regulator | Protein Coding | 48 | GC19P048954 | 62.19 |
| NBN | Nibrin | Protein Coding | 47 | GC08M089933 | 62.17 |
| GALNT12 | Polypeptide N-Acetylgalactosaminyltransferase 12 | Protein Coding | 42 | GC09P098807 | 61.85 |
| KIT | KIT Proto-Oncogene, Receptor Tyrosine Kinase | Protein Coding | 53 | GC04P054657 | 61.02 |
| RAD51D | RAD51 Paralog D | Protein Coding | 40 | GC17M035092 | 61.02 |
| EGF | Epidermal Growth Factor | Protein Coding | 51 | GC04P109912 | 60.91 |
| DICER1 | Dicer 1, Ribonuclease III | Protein Coding | 47 | GC14M095086 | 60.37 |
| MTOR | Mechanistic Target Of Rapamycin Kinase | Protein Coding | 54 | GC01M011106 | 59.26 |
| MCC | MCC Regulator Of WNT Signaling Pathway | Protein Coding | 40 | GC05M113022 | 58.59 |
| MIR21 | MicroRNA 21 | RNA Gene | 24 | GC17P059841 | 58.29 |
| MGMT | O-6-Methylguanine-DNA Methyltransferase | Protein Coding | 50 | GC10P129467 | 58 |
| SMAD7 | SMAD Family Member 7 | Protein Coding | 43 | GC18M048919 | 57.74 |
| RAD50 | RAD50 Double Strand Break Repair Protein | Protein Coding | 49 | GC05P132556 | 56.9 |
| FGFR2 | Fibroblast Growth Factor Receptor 2 | Protein Coding | 54 | GC10M121478 | 56.58 |
| IL1B | Interleukin 1 Beta | Protein Coding | 48 | GC02M112829 | 56.13 |
| CASP8 | Caspase 8 | Protein Coding | 52 | GC02P201233 | 55.79 |
| BMPR1A | Bone Morphogenetic Protein Receptor Type 1A | Protein Coding | 51 | GC10P086756 | 55.74 |
| CXCR4 | C-X-C Motif Chemokine Receptor 4 | Protein Coding | 52 | GC02M136114 | 55.7 |
| MTHFR | Methylenetetrahydrofolate Reductase | Protein Coding | 47 | GC01M011785 | 55.64 |
| FLCN | Folliculin | Protein Coding | 41 | GC17M017206 | 55.44 |
| FGFR3 | Fibroblast Growth Factor Receptor 3 | Protein Coding | 55 | GC04P001795 | 55.36 |
| RAD51C | RAD51 Paralog C | Protein Coding | 43 | GC17P058692 | 54.8 |
| ALK | ALK Receptor Tyrosine Kinase | Protein Coding | 51 | GC02M029156 | 54.74 |
| PMS1 | PMS1 Homolog 1, Mismatch Repair System Component | Protein Coding | 40 | GC02P189784 | 54.61 |
| FAS | Fas Cell Surface Death Receptor | Protein Coding | 50 | GC10P088969 | 54.03 |
| CTNNA1 | Catenin Alpha 1 | Protein Coding | 47 | GC05P138613 | 53.96 |
| SMAD3 | SMAD Family Member 3 | Protein Coding | 49 | GC15P067063 | 53.27 |
| NOTCH1 | Notch Receptor 1 | Protein Coding | 51 | GC09M136602 | 53.02 |
| AURKA | Aurora Kinase A | Protein Coding | 50 | GC20M056370 | 52.89 |
| MRE11 | MRE11 Homolog, Double Strand Break Repair Nuclease | Protein Coding | 41 | GC11M094444 | 52.86 |
| DNMT1 | DNA Methyltransferase 1 | Protein Coding | 50 | GC19M010133 | 52.73 |
| XRCC2 | X-Ray Repair Cross Complementing 2 | Protein Coding | 42 | GC07M152644 | 52.7 |
| CDKN2B | Cyclin Dependent Kinase Inhibitor 2B | Protein Coding | 47 | GC09M022002 | 52.4 |
| IL10 | Interleukin 10 | Protein Coding | 47 | GC01M206767 | 52.28 |
| IGF2 | Insulin Like Growth Factor 2 | Protein Coding | 48 | GC11M002130 | 52.26 |
| IFNG | Interferon Gamma | Protein Coding | 48 | GC12M068064 | 52.24 |
| MIR17 | MicroRNA 17 | RNA Gene | 21 | GC13P091350 | 52.21 |
| SRC | SRC Proto-Oncogene, Non-Receptor Tyrosine Kinase | Protein Coding | 51 | GC20P037344 | 52.13 |
| MIR31 | MicroRNA 31 | RNA Gene | 20 | GC09M021513 | 52.09 |
| PIK3R1 | Phosphoinositide-3-Kinase Regulatory Subunit 1 | Protein Coding | 51 | GC05P068215 | 52.02 |
| MAP2K1 | Mitogen-Activated Protein Kinase Kinase 1 | Protein Coding | 54 | GC15P066386 | 51.37 |
| FHIT | Fragile Histidine Triad Diadenosine Triphosphatase | Protein Coding | 44 | GC03M059747 | 51.12 |
| PPARG | Peroxisome Proliferator Activated Receptor Gamma | Protein Coding | 52 | GC03P012287 | 50.92 |
| EZH2 | Enhancer Of Zeste 2 Polycomb Repressive Complex 2 Subunit | Protein Coding | 54 | GC07M148807 | 50.72 |
| MIR145 | MicroRNA 145 | RNA Gene | 21 | GC05P149430 | 50.61 |
| ERCC6 | ERCC Excision Repair 6, Chromatin Remodeling Factor | Protein Coding | 45 | GC10M049454 | 50.51 |
| STAT1 | Signal Transducer And Activator Of Transcription 1 | Protein Coding | 53 | GC02M190908 | 50.5 |
| TCF7L2 | Transcription Factor 7 Like 2 | Protein Coding | 45 | GC10P112950 | 50.47 |
| DCC | DCC Netrin 1 Receptor | Protein Coding | 46 | GC18P052340 | 50.42 |
| RAF1 | Raf-1 Proto-Oncogene, Serine/Threonine Kinase | Protein Coding | 54 | GC03M012583 | 50.33 |
| TYMP | Thymidine Phosphorylase | Protein Coding | 46 | GC22M050525 | 50.29 |
| GNAS | GNAS Complex Locus | Protein Coding | 50 | GC20P058839 | 50.26 |
| MMP1 | Matrix Metallopeptidase 1 | Protein Coding | 51 | GC11M102810 | 50.12 |
| H19 | H19 Imprinted Maternally Expressed Transcript | RNA Gene | 28 | GC11M001995 | 49.66 |
| TGFBR1 | Transforming Growth Factor Beta Receptor 1 | Protein Coding | 52 | GC09P099104 | 49.65 |
| NFKB1 | Nuclear Factor Kappa B Subunit 1 | Protein Coding | 52 | GC04P102501 | 49.58 |
| MIR34A | MicroRNA 34a | RNA Gene | 22 | GC01M009151 | 49.4 |
| AKT2 | AKT Serine/Threonine Kinase 2 | Protein Coding | 54 | GC19M040230 | 49.37 |
| PLAU | Plasminogen Activator, Urokinase | Protein Coding | 51 | GC10P073909 | 49.3 |
| ERCC2 | ERCC Excision Repair 2, TFIIH Core Complex Helicase Subunit | Protein Coding | 47 | GC19M045349 | 48.59 |
| PDGFRB | Platelet Derived Growth Factor Receptor Beta | Protein Coding | 55 | GC05M150113 | 48.46 |
| CXCL12 | C-X-C Motif Chemokine Ligand 12 | Protein Coding | 45 | GC10M044294 | 48.39 |
| FASLG | Fas Ligand | Protein Coding | 47 | GC01P172628 | 48.34 |
| MIR143 | MicroRNA 143 | RNA Gene | 22 | GC05P149410 | 48.12 |
| FLT1 | Fms Related Receptor Tyrosine Kinase 1 | Protein Coding | 51 | GC13M028300 | 47.71 |
| ESR2 | Estrogen Receptor 2 | Protein Coding | 49 | GC14M064084 | 47.57 |
| TLR4 | Toll Like Receptor 4 | Protein Coding | 51 | GC09P117704 | 47.55 |
| TNFRSF10B | TNF Receptor Superfamily Member 10b | Protein Coding | 50 | GC08M023020 | 47.52 |
| MIR126 | MicroRNA 126 | RNA Gene | 22 | GC09P136670 | 47.52 |
| GREM1 | Gremlin 1, DAN Family BMP Antagonist | Protein Coding | 44 | GC15P032720 | 47.2 |
| PROM1 | Prominin 1 | Protein Coding | 44 | GC04M015965 | 47.1 |
| RNF43 | Ring Finger Protein 43 | Protein Coding | 37 | GC17M058352 | 46.99 |
| MIR146A | MicroRNA 146a | RNA Gene | 22 | GC05P160485 | 46.88 |
| AKT3 | AKT Serine/Threonine Kinase 3 | Protein Coding | 52 | GC01M243488 | 46.86 |
| SPP1 | Secreted Phosphoprotein 1 | Protein Coding | 46 | GC04P087975 | 46.73 |
| MIR125A | MicroRNA 125a | RNA Gene | 21 | GC19P051720 | 46.7 |
| SLC2A1 | Solute Carrier Family 2 Member 1 | Protein Coding | 52 | GC01M042925 | 46.62 |
| TSC2 | TSC Complex Subunit 2 | Protein Coding | 50 | GC16P002436 | 46.6 |
| MIR221 | MicroRNA 221 | RNA Gene | 20 | GC0XM045746 | 46.38 |
| MIR141 | MicroRNA 141 | RNA Gene | 21 | GC12P008231 | 46.34 |
| BUB1B | BUB1 Mitotic Checkpoint Serine/Threonine Kinase B | Protein Coding | 49 | GC15P040161 | 46.3 |
| MIR155 | MicroRNA 155 | RNA Gene | 18 | GC21P025573 | 46.05 |
| OGG1 | 8-Oxoguanine DNA Glycosylase | Protein Coding | 47 | GC03P009751 | 45.78 |
| FLT4 | Fms Related Receptor Tyrosine Kinase 4 | Protein Coding | 52 | GC05M180607 | 45.77 |
| MIR200C | MicroRNA 200c | RNA Gene | 21 | GC12P008229 | 45.61 |
| MEG3 | Maternally Expressed 3 | RNA Gene | 29 | GC14P104771 | 45.55 |
| XRCC3 | X-Ray Repair Cross Complementing 3 | Protein Coding | 41 | GC14M103697 | 45.43 |
| TOP2A | DNA Topoisomerase II Alpha | Protein Coding | 50 | GC17M040388 | 45.4 |
| MIR27A | MicroRNA 27a | RNA Gene | 22 | GC19M014010 | 45.38 |
| TP73 | Tumor Protein P73 | Protein Coding | 45 | GC01P003652 | 45.21 |
| AXIN1 | Axin 1 | Protein Coding | 47 | GC16M000287 | 45.04 |
| PTGS2 | Prostaglandin-Endoperoxide Synthase 2 | Protein Coding | 48 | GC01M186640 | 44.99 |
| PTCH1 | Patched 1 | Protein Coding | 50 | GC09M095442 | 44.97 |
| HSPB1 | Heat Shock Protein Family B (Small) Member 1 | Protein Coding | 51 | GC07P076302 | 44.93 |
| XIAP | X-Linked Inhibitor Of Apoptosis | Protein Coding | 49 | GC0XP123859 | 44.85 |
| ERCC1 | ERCC Excision Repair 1, Endonuclease Non-Catalytic Subunit | Protein Coding | 45 | GC19M045409 | 44.78 |
| TGFB2 | Transforming Growth Factor Beta 2 | Protein Coding | 50 | GC01P218345 | 44.37 |
| MIR200B | MicroRNA 200b | RNA Gene | 20 | GC01P001167 | 44.33 |
| IDH1 | Isocitrate Dehydrogenase (NADP(+)) 1 | Protein Coding | 52 | GC02M208236 | 44.29 |
| MIR222 | MicroRNA 222 | RNA Gene | 21 | GC0XM045747 | 44.25 |
| GLI1 | GLI Family Zinc Finger 1 | Protein Coding | 47 | GC12P057460 | 44.17 |
| CDKN3 | Cyclin Dependent Kinase Inhibitor 3 | Protein Coding | 42 | GC14P054398 | 44.15 |
| YAP1 | Yes1 Associated Transcriptional Regulator | Protein Coding | 47 | GC11P102110 | 43.97 |
| TIMP3 | TIMP Metallopeptidase Inhibitor 3 | Protein Coding | 45 | GC22P032800 | 43.93 |
| ERBB4 | Erb-B2 Receptor Tyrosine Kinase 4 | Protein Coding | 55 | GC02M211375 | 43.92 |
| RELA | RELA Proto-Oncogene, NF-KB Subunit | Protein Coding | 50 | GC11M065653 | 43.84 |
| JAK2 | Janus Kinase 2 | Protein Coding | 54 | GC09P004985 | 43.78 |
| TWIST1 | Twist Family BHLH Transcription Factor 1 | Protein Coding | 45 | GC07M019020 | 43.78 |
| AR | Androgen Receptor | Protein Coding | 53 | GC0XP067544 | 43.77 |
| MIR200A | MicroRNA 200a | RNA Gene | 21 | GC01P001463 | 43.7 |
| NFE2L2 | Nuclear Factor, Erythroid 2 Like 2 | Protein Coding | 48 | GC02M177227 | 43.66 |
| MIR195 | MicroRNA 195 | RNA Gene | 19 | GC17M007018 | 43.57 |
| MIR205 | MicroRNA 205 | RNA Gene | 20 | GC01P209432 | 43.45 |
| MIR182 | MicroRNA 182 | RNA Gene | 20 | GC07M129770 | 43.27 |
| ZEB1 | Zinc Finger E-Box Binding Homeobox 1 | Protein Coding | 48 | GC10P031318 | 43.18 |
| MMP2 | Matrix Metallopeptidase 2 | Protein Coding | 53 | GC16P055390 | 43.13 |
| MIR214 | MicroRNA 214 | RNA Gene | 20 | GC01M172234 | 43.06 |
| MAP2K2 | Mitogen-Activated Protein Kinase Kinase 2 | Protein Coding | 53 | GC19M004090 | 42.7 |
| BUB1 | BUB1 Mitotic Checkpoint Serine/Threonine Kinase | Protein Coding | 49 | GC02M110637 | 42.69 |
| WNT5A | Wnt Family Member 5A | Protein Coding | 49 | GC03M055465 | 42.61 |
| MIR223 | MicroRNA 223 | RNA Gene | 21 | GC0XP066018 | 42.41 |
| MIR142 | MicroRNA 142 | RNA Gene | 20 | GC17M058331 | 42.24 |
| MIR335 | MicroRNA 335 | RNA Gene | 18 | GC07P130496 | 42.15 |
| MIR183 | MicroRNA 183 | RNA Gene | 18 | GC07M129789 | 42.14 |
| MIR20A | MicroRNA 20a | RNA Gene | 19 | GC13P091434 | 41.98 |
| NOS2 | Nitric Oxide Synthase 2 | Protein Coding | 49 | GC17M027756 | 41.92 |
| PIK3R2 | Phosphoinositide-3-Kinase Regulatory Subunit 2 | Protein Coding | 49 | GC19P018153 | 41.85 |
| CYP1B1 | Cytochrome P450 Family 1 Subfamily B Member 1 | Protein Coding | 48 | GC02M038034 | 41.76 |
| PDGFRA | Platelet Derived Growth Factor Receptor Alpha | Protein Coding | 55 | GC04P054229 | 41.74 |
| MIR203A | MicroRNA 203a | RNA Gene | 19 | GC14P104655 | 41.48 |
| MMP9 | Matrix Metallopeptidase 9 | Protein Coding | 52 | GC20P046008 | 41.44 |
| MIR10B | MicroRNA 10b | RNA Gene | 21 | GC02P176150 | 41.41 |
| MIR150 | MicroRNA 150 | RNA Gene | 21 | GC19M049500 | 41.35 |
| ARID1A | AT-Rich Interaction Domain 1A | Protein Coding | 44 | GC01P026693 | 41.35 |
| EPHB2 | EPH Receptor B2 | Protein Coding | 51 | GC01P022710 | 41.29 |
| MIRLET7A1 | MicroRNA Let-7a-1 | RNA Gene | 21 | GC09P094175 | 41.25 |
| ODC1 | Ornithine Decarboxylase 1 | Protein Coding | 47 | GC02M010432 | 41.24 |
| MIR483 | MicroRNA 483 | RNA Gene | 18 | GC11M002188 | 41.13 |
| CHEK1 | Checkpoint Kinase 1 | Protein Coding | 50 | GC11P125625 | 41.1 |
| DPYD | Dihydropyrimidine Dehydrogenase | Protein Coding | 51 | GC01M097015 | 40.95 |
| MIR22 | MicroRNA 22 | RNA Gene | 20 | GC17M001713 | 40.88 |
| SOS1 | SOS Ras/Rac Guanine Nucleotide Exchange Factor 1 | Protein Coding | 47 | GC02M038981 | 40.85 |
| MIR181A1 | MicroRNA 181a-1 | RNA Gene | 18 | GC01M198860 | 40.85 |
| MIR140 | MicroRNA 140 | RNA Gene | 22 | GC16P069934 | 40.85 |
| MIR29C | MicroRNA 29c | RNA Gene | 18 | GC01M207802 | 40.76 |
| BCL2 | BCL2 Apoptosis Regulator | Protein Coding | 51 | GC18M063123 | 40.71 |
| SETD2 | SET Domain Containing 2, Histone Lysine Methyltransferase | Protein Coding | 47 | GC03M047033 | 40.65 |
| WRN | WRN RecQ Like Helicase | Protein Coding | 45 | GC08P031033 | 40.55 |
| MIR193A | MicroRNA 193a | RNA Gene | 18 | GC17P031559 | 40.41 |
| WNT1 | Wnt Family Member 1 | Protein Coding | 46 | GC12P049053 | 40.4 |
| NFKBIA | NFKB Inhibitor Alpha | Protein Coding | 50 | GC14M035401 | 40.39 |
| CTLA4 | Cytotoxic T-Lymphocyte Associated Protein 4 | Protein Coding | 45 | GC02P203867 | 40.25 |
| RAD51 | RAD51 Recombinase | Protein Coding | 52 | GC15P040694 | 40.17 |
| MIR29A | MicroRNA 29a | RNA Gene | 21 | GC07M130876 | 40.13 |
| DDB2 | Damage Specific DNA Binding Protein 2 | Protein Coding | 45 | GC11P047237 | 39.99 |
| MIR15A | MicroRNA 15a | RNA Gene | 16 | GC13M050049 | 39.96 |
| MIR106B | MicroRNA 106b | RNA Gene | 21 | GC07M100284 | 39.93 |
| PLG | Plasminogen | Protein Coding | 48 | GC06P160702 | 39.79 |
| JUN | Jun Proto-Oncogene, AP-1 Transcription Factor Subunit | Protein Coding | 49 | GC01M058780 | 39.48 |
| MIR224 | MicroRNA 224 | RNA Gene | 17 | GC0XM151958 | 39.42 |
| ICAM1 | Intercellular Adhesion Molecule 1 | Protein Coding | 50 | GC19P010270 | 39.37 |
| CASP3 | Caspase 3 | Protein Coding | 50 | GC04M184627 | 39.22 |
| FH | Fumarate Hydratase | Protein Coding | 45 | GC01M241499 | 39.11 |
| CREB1 | CAMP Responsive Element Binding Protein 1 | Protein Coding | 48 | GC02P207529 | 39.04 |
| MIR127 | MicroRNA 127 | RNA Gene | 20 | GC14P104580 | 38.92 |
| MUC1 | Mucin 1, Cell Surface Associated | Protein Coding | 47 | GC01M155185 | 38.88 |
| MIR34C | MicroRNA 34c | RNA Gene | 21 | GC11P111582 | 38.83 |
| MIR99A | MicroRNA 99a | RNA Gene | 21 | GC21P016539 | 38.74 |
| MIR100 | MicroRNA 100 | RNA Gene | 21 | GC11M122152 | 38.59 |
| MIR144 | MicroRNA 144 | RNA Gene | 16 | GC17M029965 | 38.55 |
| IRS1 | Insulin Receptor Substrate 1 | Protein Coding | 47 | GC02M226731 | 38.49 |
| MIR96 | MicroRNA 96 | RNA Gene | 20 | GC07M129774 | 38.37 |
| MIR424 | MicroRNA 424 | RNA Gene | 17 | GC0XM134627 | 38.24 |
| MIR93 | MicroRNA 93 | RNA Gene | 20 | GC07M100282 | 38.19 |
| MIRLET7B | MicroRNA Let-7b | RNA Gene | 20 | GC22P046119 | 38.18 |
| ETS1 | ETS Proto-Oncogene 1, Transcription Factor | Protein Coding | 49 | GC11M128458 | 38.17 |
| MAPK1 | Mitogen-Activated Protein Kinase 1 | Protein Coding | 51 | GC22M021754 | 38.06 |
| MIR25 | MicroRNA 25 | RNA Gene | 20 | GC07M100093 | 38.01 |
| KLF6 | Kruppel Like Factor 6 | Protein Coding | 44 | GC10M003779 | 37.99 |
| KCNQ1OT1 | KCNQ1 Opposite Strand/Antisense Transcript 1 | RNA Gene | 25 | GC11M002661 | 37.95 |
| MIR191 | MicroRNA 191 | RNA Gene | 20 | GC03M049247 | 37.95 |
| LEP | Leptin | Protein Coding | 47 | GC07P128241 | 37.87 |
| ENG | Endoglin | Protein Coding | 46 | GC09M127815 | 37.66 |
| FOXP3 | Forkhead Box P3 | Protein Coding | 46 | GC0XM049250 | 37.62 |
| MIR18A | MicroRNA 18a | RNA Gene | 18 | GC13P091432 | 37.54 |
| SMARCA4 | SWI/SNF Related, Matrix Associated, Actin Dependent Regulator Of Chromatin, Subfamily A, Member 4 | Protein Coding | 50 | GC19P010932 | 37.42 |
| MEN1 | Menin 1 | Protein Coding | 46 | GC11M064803 | 37.39 |
| MIR23A | MicroRNA 23a | RNA Gene | 20 | GC19M014011 | 37.3 |
| FGFR1 | Fibroblast Growth Factor Receptor 1 | Protein Coding | 55 | GC08M038400 | 37.28 |
| DNMT3A | DNA Methyltransferase 3 Alpha | Protein Coding | 51 | GC02M025228 | 37.04 |
| PPP2R1B | Protein Phosphatase 2 Scaffold Subunit Abeta | Protein Coding | 47 | GC11M111695 | 37.02 |
| MIR106A | MicroRNA 106a | RNA Gene | 18 | GC0XM134219 | 36.95 |
| HLA-A | Major Histocompatibility Complex, Class I, A | Protein Coding | 46 | GC06P047265 | 36.84 |
| TLR2 | Toll Like Receptor 2 | Protein Coding | 51 | GC04P153684 | 36.79 |
| ZEB2 | Zinc Finger E-Box Binding Homeobox 2 | Protein Coding | 48 | GC02M144384 | 36.71 |
| BIRC5 | Baculoviral IAP Repeat Containing 5 | Protein Coding | 47 | GC17P078214 | 36.7 |
| MIR29B1 | MicroRNA 29b-1 | RNA Gene | 21 | GC07M130877 | 36.68 |
| INS | Insulin | Protein Coding | 48 | GC11M002159 | 36.58 |
| TSC1 | TSC Complex Subunit 1 | Protein Coding | 48 | GC09M132891 | 36.57 |
| GSTM1 | Glutathione S-Transferase Mu 1 | Protein Coding | 41 | GC01P109687 | 36.57 |
| GSTP1 | Glutathione S-Transferase Pi 1 | Protein Coding | 50 | GC11P067583 | 36.48 |
| MIR23B | MicroRNA 23b | RNA Gene | 20 | GC09P095085 | 36.29 |
| TYMS | Thymidylate Synthetase | Protein Coding | 47 | GC18P000657 | 36.28 |
| U2AF1 | U2 Small Nuclear RNA Auxiliary Factor 1 | Protein Coding | 41 | GC21M043092 | 36.23 |
| MPO | Myeloperoxidase | Protein Coding | 50 | GC17M058269 | 36.2 |
| CEACAM5 | CEA Cell Adhesion Molecule 5 | Protein Coding | 41 | GC19P041709 | 36.12 |
| HIF1A | Hypoxia Inducible Factor 1 Subunit Alpha | Protein Coding | 47 | GC14P061695 | 36.04 |
| ABCC2 | ATP Binding Cassette Subfamily C Member 2 | Protein Coding | 47 | GC10P099782 | 36.01 |
| MIR19A | MicroRNA 19a | RNA Gene | 19 | GC13P091433 | 35.86 |
| MT-CO1 | Mitochondrially Encoded Cytochrome C Oxidase I | Protein Coding | 32 | GCMTP005906 | 35.7 |
| ROS1 | ROS Proto-Oncogene 1, Receptor Tyrosine Kinase | Protein Coding | 45 | GC06M117287 | 35.63 |
| ABCB1 | ATP Binding Cassette Subfamily B Member 1 | Protein Coding | 51 | GC07M087504 | 35.53 |
| MT-CYB | Mitochondrially Encoded Cytochrome B | Protein Coding | 31 | GCMTP014749 | 35.5 |
| NF2 | Neurofibromin 2 | Protein Coding | 48 | GC22P029603 | 35.41 |
| MIR15B | MicroRNA 15b | RNA Gene | 18 | GC03P160404 | 35.34 |
| CD274 | CD274 Molecule | Protein Coding | 44 | GC09P005450 | 35.2 |
| MIR451A | MicroRNA 451a | RNA Gene | 17 | GC17M028861 | 35.13 |
| MIR10A | MicroRNA 10a | RNA Gene | 21 | GC17M048579 | 35.02 |
| MIR34B | MicroRNA 34b | RNA Gene | 21 | GC11P111546 | 34.93 |
| MIR29B2 | MicroRNA 29b-2 | RNA Gene | 18 | GC01M207806 | 34.85 |
| MIRLET7G | MicroRNA Let-7g | RNA Gene | 20 | GC03M052268 | 34.79 |
| ADIPOQ | Adiponectin, C1Q And Collagen Domain Containing | Protein Coding | 45 | GC03P186842 | 34.78 |
| ACTB | Actin Beta | Protein Coding | 49 | GC07M005527 | 34.76 |
| IGF1 | Insulin Like Growth Factor 1 | Protein Coding | 50 | GC12M102395 | 34.66 |
| MIR375 | MicroRNA 375 | RNA Gene | 19 | GC02M219001 | 34.64 |
| SMAD2 | SMAD Family Member 2 | Protein Coding | 47 | GC18M047809 | 34.54 |
| PIK3CD | Phosphatidylinositol-4,5-Bisphosphate 3-Kinase Catalytic Subunit Delta | Protein Coding | 53 | GC01P009629 | 34.54 |
| XRCC1 | X-Ray Repair Cross Complementing 1 | Protein Coding | 43 | GC19M043543 | 34.48 |
| MIR128-2 | MicroRNA 128-2 | RNA Gene | 20 | GC03P035750 | 34.45 |
| TLR3 | Toll Like Receptor 3 | Protein Coding | 52 | GC04P186059 | 34.32 |
| NTHL1 | Nth Like DNA Glycosylase 1 | Protein Coding | 44 | GC16M002192 | 34.29 |
| TCF4 | Transcription Factor 4 | Protein Coding | 46 | GC18M055222 | 34.28 |
| MIR107 | MicroRNA 107 | RNA Gene | 19 | GC10M089600 | 34.26 |
| SDHB | Succinate Dehydrogenase Complex Iron Sulfur Subunit B | Protein Coding | 47 | GC01M017020 | 34.18 |
| PRSS1 | Serine Protease 1 | Protein Coding | 45 | GC07P144938 | 34.14 |
| IGFBP3 | Insulin Like Growth Factor Binding Protein 3 | Protein Coding | 45 | GC07M045912 | 34.12 |
| KDR | Kinase Insert Domain Receptor | Protein Coding | 53 | GC04M055078 | 34.02 |
| MIR192 | MicroRNA 192 | RNA Gene | 21 | GC11M064891 | 34.02 |
| MIR296 | MicroRNA 296 | RNA Gene | 17 | GC20M058817 | 33.96 |
| DLC1 | DLC1 Rho GTPase Activating Protein | Protein Coding | 44 | GC08M013083 | 33.95 |
| CXCL8 | C-X-C Motif Chemokine Ligand 8 | Protein Coding | 41 | GC04P073740 | 33.87 |
| TNFRSF1A | TNF Receptor Superfamily Member 1A | Protein Coding | 49 | GC12M006328 | 33.85 |
| NKX2-1 | NK2 Homeobox 1 | Protein Coding | 46 | GC14M036516 | 33.72 |
| IGF2R | Insulin Like Growth Factor 2 Receptor | Protein Coding | 45 | GC06P159969 | 33.63 |
| CALR | Calreticulin | Protein Coding | 51 | GC19P012938 | 33.58 |
| NOD2 | Nucleotide Binding Oligomerization Domain Containing 2 | Protein Coding | 48 | GC16P050693 | 33.48 |
| BCL2L1 | BCL2 Like 1 | Protein Coding | 47 | GC20M031664 | 33.46 |
| LAMC2 | Laminin Subunit Gamma 2 | Protein Coding | 45 | GC01P183155 | 33.32 |
| PDGFRL | Platelet Derived Growth Factor Receptor Like | Protein Coding | 41 | GC08P017576 | 33.22 |
| MYCN | MYCN Proto-Oncogene, BHLH Transcription Factor | Protein Coding | 46 | GC02P015949 | 33.17 |
| CD44 | CD44 Molecule (Indian Blood Group) | Protein Coding | 47 | GC11P035139 | 33.01 |
| MIR320A | MicroRNA 320a | RNA Gene | 20 | GC08M022246 | 32.99 |
| FANCG | FA Complementation Group G | Protein Coding | 43 | GC09M035073 | 32.92 |
| IL13 | Interleukin 13 | Protein Coding | 44 | GC05P132656 | 32.79 |
| SMARCB1 | SWI/SNF Related, Matrix Associated, Actin Dependent Regulator Of Chromatin, Subfamily B, Member 1 | Protein Coding | 45 | GC22P023786 | 32.76 |
| MIR32 | MicroRNA 32 | RNA Gene | 19 | GC09M109046 | 32.69 |
| ALOX5 | Arachidonate 5-Lipoxygenase | Protein Coding | 48 | GC10P045374 | 32.55 |
| CASP9 | Caspase 9 | Protein Coding | 48 | GC01M015491 | 32.54 |
| CYP17A1 | Cytochrome P450 Family 17 Subfamily A Member 1 | Protein Coding | 48 | GC10M102830 | 32.38 |
| MMP7 | Matrix Metallopeptidase 7 | Protein Coding | 48 | GC11M102425 | 32.28 |
| MAPK3 | Mitogen-Activated Protein Kinase 3 | Protein Coding | 49 | GC16M030117 | 32.24 |
| CD46 | CD46 Molecule | Protein Coding | 46 | GC01P207752 | 32.22 |
| MIR181A2 | MicroRNA 181a-2 | RNA Gene | 20 | GC09P124692 | 32.21 |
| IGF1R | Insulin Like Growth Factor 1 Receptor | Protein Coding | 54 | GC15P098648 | 32.18 |
| HPGD | 15-Hydroxyprostaglandin Dehydrogenase | Protein Coding | 48 | GC04M174490 | 32.14 |
| KRT20 | Keratin 20 | Protein Coding | 41 | GC17M040875 | 32.09 |
| NR3C2 | Nuclear Receptor Subfamily 3 Group C Member 2 | Protein Coding | 48 | GC04M148078 | 32.04 |
| GLI3 | GLI Family Zinc Finger 3 | Protein Coding | 48 | GC07M041960 | 31.79 |
| MIR342 | MicroRNA 342 | RNA Gene | 19 | GC14P100109 | 31.66 |
| IL2 | Interleukin 2 | Protein Coding | 45 | GC04M122451 | 31.59 |
| HNF4A | Hepatocyte Nuclear Factor 4 Alpha | Protein Coding | 50 | GC20P044355 | 31.43 |
| MIR133B | MicroRNA 133b | RNA Gene | 21 | GC06P052148 | 31.41 |
| BCL10 | BCL10 Immune Signaling Adaptor | Protein Coding | 45 | GC01M085265 | 31.28 |
| MIR26A1 | MicroRNA 26a-1 | RNA Gene | 20 | GC03P037969 | 31.24 |
| LRP5 | LDL Receptor Related Protein 5 | Protein Coding | 48 | GC11P068298 | 31.23 |
| MIR24-2 | MicroRNA 24-2 | RNA Gene | 18 | GC19M014008 | 31.2 |
| MIR132 | MicroRNA 132 | RNA Gene | 21 | GC17M002049 | 31.14 |
| RAC2 | Rac Family Small GTPase 2 | Protein Coding | 51 | GC22M037227 | 31.1 |
| BMP2 | Bone Morphogenetic Protein 2 | Protein Coding | 47 | GC20P006696 | 31.1 |
| MIR137 | MicroRNA 137 | RNA Gene | 18 | GC01M098046 | 31.02 |
| CYP1A1 | Cytochrome P450 Family 1 Subfamily A Member 1 | Protein Coding | 47 | GC15M074719 | 30.96 |
| TRIM28 | Tripartite Motif Containing 28 | Protein Coding | 43 | GC19P058544 | 30.95 |
| RAD51L3-RFFL | RAD51L3-RFFL Readthrough | RNA Gene | 9 | GC17M035009 | 30.95 |
| WNT2B | Wnt Family Member 2B | Protein Coding | 44 | GC01P112466 | 30.8 |
| SIL1 | SIL1 Nucleotide Exchange Factor | Protein Coding | 41 | GC05M138957 | 30.62 |
| HPRT1 | Hypoxanthine Phosphoribosyltransferase 1 | Protein Coding | 48 | GC0XP134460 | 30.6 |
| MIR532 | MicroRNA 532 | RNA Gene | 16 | GC0XP050004 | 30.53 |
| CYCS | Cytochrome C, Somatic | Protein Coding | 48 | GC07M025118 | 30.4 |
| WT1 | WT1 Transcription Factor | Protein Coding | 49 | GC11M032365 | 30.35 |
| UGT1A1 | UDP Glucuronosyltransferase Family 1 Member A1 | Protein Coding | 48 | GC02P233760 | 30.31 |
| TGFA | Transforming Growth Factor Alpha | Protein Coding | 46 | GC02M070447 | 30.23 |
| VEGFC | Vascular Endothelial Growth Factor C | Protein Coding | 47 | GC04M176683 | 30.19 |
| FZD4 | Frizzled Class Receptor 4 | Protein Coding | 51 | GC11M086945 | 30.11 |
| TERC | Telomerase RNA Component | RNA Gene | 28 | GC03M169765 | 29.96 |
| GUSB | Glucuronidase Beta | Protein Coding | 47 | GC07M065960 | 29.91 |
| FN1 | Fibronectin 1 | Protein Coding | 50 | GC02M215360 | 29.87 |
| PLA2G2A | Phospholipase A2 Group IIA | Protein Coding | 45 | GC01M019975 | 29.85 |
| RPS6KB1 | Ribosomal Protein S6 Kinase B1 | Protein Coding | 49 | GC17P059893 | 29.79 |
| WNT4 | Wnt Family Member 4 | Protein Coding | 47 | GC01M022190 | 29.78 |
| MTR | 5-Methyltetrahydrofolate-Homocysteine Methyltransferase | Protein Coding | 46 | GC01P236795 | 29.74 |
| ABCA1 | ATP Binding Cassette Subfamily A Member 1 | Protein Coding | 48 | GC09M104781 | 29.72 |
| MAPK8 | Mitogen-Activated Protein Kinase 8 | Protein Coding | 50 | GC10P048306 | 29.63 |
| MUC5AC | Mucin 5AC, Oligomeric Mucus/Gel-Forming | Protein Coding | 39 | GC11P001151 | 29.61 |
| RNASEL | Ribonuclease L | Protein Coding | 44 | GC01M182542 | 29.48 |
| BLM | BLM RecQ Like Helicase | Protein Coding | 48 | GC15P090717 | 29.46 |
| RASSF1 | Ras Association Domain Family Member 1 | Protein Coding | 44 | GC03M050329 | 29.43 |
| APOB | Apolipoprotein B | Protein Coding | 45 | GC02M020956 | 29.42 |
| MIR196B | MicroRNA 196b | RNA Gene | 20 | GC07M027260 | 29.41 |
| KEAP1 | Kelch Like ECH Associated Protein 1 | Protein Coding | 48 | GC19M010486 | 29.37 |
| KRT7 | Keratin 7 | Protein Coding | 41 | GC12P052232 | 29.35 |
| NTRK1 | Neurotrophic Receptor Tyrosine Kinase 1 | Protein Coding | 48 | GC01P156786 | 29.34 |
| NQO1 | NAD(P)H Quinone Dehydrogenase 1 | Protein Coding | 49 | GC16M069706 | 29.13 |
| FGF2 | Fibroblast Growth Factor 2 | Protein Coding | 47 | GC04P122826 | 29.07 |
| ABCG2 | ATP Binding Cassette Subfamily G Member 2 (Junior Blood Group) | Protein Coding | 50 | GC04M088090 | 29.07 |
| TLR5 | Toll Like Receptor 5 | Protein Coding | 47 | GC01M223109 | 29.02 |
| PTK2 | Protein Tyrosine Kinase 2 | Protein Coding | 47 | GC08M140657 | 28.96 |
| KLLN | Killin, P53 Regulated DNA Replication Inhibitor | Protein Coding | 29 | GC10M087860 | 28.89 |
| ERBB3 | Erb-B2 Receptor Tyrosine Kinase 3 | Protein Coding | 54 | GC12P056094 | 28.86 |
| LEF1 | Lymphoid Enhancer Binding Factor 1 | Protein Coding | 47 | GC04M108047 | 28.83 |
| MUC16 | Mucin 16, Cell Surface Associated | Protein Coding | 36 | GC19M008848 | 28.82 |
| CASR | Calcium Sensing Receptor | Protein Coding | 50 | GC03P122183 | 28.79 |
| DACT1 | Dishevelled Binding Antagonist Of Beta Catenin 1 | Protein Coding | 39 | GC14P058633 | 28.74 |
| PARP1 | Poly(ADP-Ribose) Polymerase 1 | Protein Coding | 49 | GC01M226360 | 28.7 |
| BAP1 | BRCA1 Associated Protein 1 | Protein Coding | 45 | GC03M052401 | 28.68 |
| MIR215 | MicroRNA 215 | RNA Gene | 18 | GC01M220117 | 28.67 |
| CCND2 | Cyclin D2 | Protein Coding | 50 | GC12P008103 | 28.57 |
| MIR328 | MicroRNA 328 | RNA Gene | 18 | GC16M067203 | 28.48 |
| TNFSF10 | TNF Superfamily Member 10 | Protein Coding | 46 | GC03M172505 | 28.43 |
| CDX2 | Caudal Type Homeobox 2 | Protein Coding | 43 | GC13M027962 | 28.42 |
| SEMA4A | Semaphorin 4A | Protein Coding | 45 | GC01P156119 | 28.17 |
| TOP1 | DNA Topoisomerase I | Protein Coding | 48 | GC20P041028 | 28.17 |
| CDK1 | Cyclin Dependent Kinase 1 | Protein Coding | 45 | GC10P060772 | 28.1 |
| HGF | Hepatocyte Growth Factor | Protein Coding | 52 | GC07M081699 | 28.08 |
| P2RX7 | Purinergic Receptor P2X 7 | Protein Coding | 45 | GC12P122829 | 28.06 |
| RHOA | Ras Homolog Family Member A | Protein Coding | 46 | GC03M049359 | 28.06 |
| GSK3B | Glycogen Synthase Kinase 3 Beta | Protein Coding | 50 | GC03M119821 | 28.05 |
| CRP | C-Reactive Protein | Protein Coding | 46 | GC01M159716 | 28.01 |
| MKI67 | Marker Of Proliferation Ki-67 | Protein Coding | 44 | GC10M128096 | 28.01 |
| MMP14 | Matrix Metallopeptidase 14 | Protein Coding | 51 | GC14P025277 | 27.99 |
| AKAP9 | A-Kinase Anchoring Protein 9 | Protein Coding | 43 | GC07P091940 | 27.95 |
| MT-CO2 | Mitochondrially Encoded Cytochrome C Oxidase II | Protein Coding | 32 | GCMTP007587 | 27.92 |
| HOXB13 | Homeobox B13 | Protein Coding | 43 | GC17M048725 | 27.89 |
| FBXW7 | F-Box And WD Repeat Domain Containing 7 | Protein Coding | 44 | GC04M152321 | 27.79 |
| SDHD | Succinate Dehydrogenase Complex Subunit D | Protein Coding | 44 | GC11P112087 | 27.74 |
| RARB | Retinoic Acid Receptor Beta | Protein Coding | 50 | GC03P024830 | 27.74 |
| PTPN11 | Protein Tyrosine Phosphatase Non-Receptor Type 11 | Protein Coding | 53 | GC12P112418 | 27.7 |
| BMP6 | Bone Morphogenetic Protein 6 | Protein Coding | 43 | GC06P007726 | 27.69 |
| CDK2 | Cyclin Dependent Kinase 2 | Protein Coding | 52 | GC12P055966 | 27.69 |
| PRKAR1A | Protein Kinase CAMP-Dependent Type I Regulatory Subunit Alpha | Protein Coding | 51 | GC17P068414 | 27.65 |
| ARAF | A-Raf Proto-Oncogene, Serine/Threonine Kinase | Protein Coding | 45 | GC0XP047562 | 27.54 |
| LIG4 | DNA Ligase 4 | Protein Coding | 48 | GC13M108207 | 27.54 |
| HOTAIR | HOX Transcript Antisense RNA | RNA Gene | 25 | GC12M053962 | 27.52 |
| MIR372 | MicroRNA 372 | RNA Gene | 16 | GC19P054631 | 27.46 |
| SNAI1 | Snail Family Transcriptional Repressor 1 | Protein Coding | 44 | GC20P049982 | 27.3 |
| ACSL4 | Acyl-CoA Synthetase Long Chain Family Member 4 | Protein Coding | 44 | GC0XM109624 | 27.27 |
| KRT19 | Keratin 19 | Protein Coding | 45 | GC17M041523 | 27.25 |
| E2F1 | E2F Transcription Factor 1 | Protein Coding | 43 | GC20M033675 | 27.24 |
| BAK1 | BCL2 Antagonist/Killer 1 | Protein Coding | 44 | GC06M033572 | 27.21 |
| ALB | Albumin | Protein Coding | 50 | GC04P073397 | 27.2 |
| MCL1 | MCL1 Apoptosis Regulator, BCL2 Family Member | Protein Coding | 47 | GC01M150707 | 27.19 |
| PCNA | Proliferating Cell Nuclear Antigen | Protein Coding | 51 | GC20M005114 | 27.18 |
| RAC1 | Rac Family Small GTPase 1 | Protein Coding | 49 | GC07P006380 | 27.15 |
| ITGB1 | Integrin Subunit Beta 1 | Protein Coding | 50 | GC10M032900 | 27.13 |
| SP1 | Sp1 Transcription Factor | Protein Coding | 44 | GC12P053380 | 27.1 |
| HDC | Histidine Decarboxylase | Protein Coding | 44 | GC15M050241 | 27.07 |
| TBX1 | T-Box Transcription Factor 1 | Protein Coding | 42 | GC22P019747 | 27.07 |
| ABCC1 | ATP Binding Cassette Subfamily C Member 1 | Protein Coding | 47 | GC16P015949 | 27.07 |
| COLCA2 | Colorectal Cancer Associated 2 | Protein Coding | 24 | GC11P111298 | 27.07 |
| KLF5 | Kruppel Like Factor 5 | Protein Coding | 44 | GC13P073054 | 27.06 |
| CCNA2 | Cyclin A2 | Protein Coding | 44 | GC04M121816 | 27.06 |
| FZD6 | Frizzled Class Receptor 6 | Protein Coding | 47 | GC08P103298 | 27.02 |
| MALAT1 | Metastasis Associated Lung Adenocarcinoma Transcript 1 | RNA Gene | 24 | GC11P065806 | 27.01 |
| PLAUR | Plasminogen Activator, Urokinase Receptor | Protein Coding | 44 | GC19M043646 | 26.96 |
| CSF2 | Colony Stimulating Factor 2 | Protein Coding | 44 | GC05P132073 | 26.93 |
| CDK6 | Cyclin Dependent Kinase 6 | Protein Coding | 54 | GC07M092604 | 26.9 |
| FOXH1 | Forkhead Box H1 | Protein Coding | 41 | GC08M144473 | 26.89 |
| HSP90AA1 | Heat Shock Protein 90 Alpha Family Class A Member 1 | Protein Coding | 48 | GC14M102080 | 26.8 |
| PIK3CB | Phosphatidylinositol-4,5-Bisphosphate 3-Kinase Catalytic Subunit Beta | Protein Coding | 47 | GC03M138652 | 26.76 |
| BMP4 | Bone Morphogenetic Protein 4 | Protein Coding | 49 | GC14M053949 | 26.74 |
| CAV1 | Caveolin 1 | Protein Coding | 48 | GC07P116524 | 26.7 |
| AREG | Amphiregulin | Protein Coding | 43 | GC04P074445 | 26.68 |
| MIR30E | MicroRNA 30e | RNA Gene | 21 | GC01P040754 | 26.66 |
| TIMP1 | TIMP Metallopeptidase Inhibitor 1 | Protein Coding | 45 | GC0XP047583 | 26.65 |
| VDR | Vitamin D Receptor | Protein Coding | 51 | GC12M047841 | 26.65 |
| CRCS2 | Colorectal Cancer, Susceptibility To, 2 | Genetic Locus | 2 | GC08U901124 | 26.63 |
| CCNB1 | Cyclin B1 | Protein Coding | 47 | GC05P069167 | 26.63 |
| MIR199A1 | MicroRNA 199a-1 | RNA Gene | 18 | GC19M010792 | 26.58 |
| COX5A | Cytochrome C Oxidase Subunit 5A | Protein Coding | 43 | GC15M074919 | 26.58 |
| FOS | Fos Proto-Oncogene, AP-1 Transcription Factor Subunit | Protein Coding | 50 | GC14P075278 | 26.54 |
| TCOF1 | Treacle Ribosome Biogenesis Factor 1 | Protein Coding | 42 | GC05P150358 | 26.51 |
| NME1 | NME/NM23 Nucleoside Diphosphate Kinase 1 | Protein Coding | 47 | GC17P051154 | 26.48 |
| CRCS5 | Colorectal Cancer, Susceptibility To, 5 | Genetic Locus | 2 | GC10U901096 | 26.37 |
| CRCS6 | Colorectal Cancer, Susceptibility To, 6 | Genetic Locus | 2 | GC08U901098 | 26.37 |
| CRCS11 | Colorectal Cancer, Susceptibility To, 11 | Genetic Locus | 2 | GC20U900444 | 26.34 |
| CRCS9 | Colorectal Cancer, Susceptibility To, 9 | Genetic Locus | 2 | GC16U901133 | 26.34 |
| MT-ND4L | Mitochondrially Encoded NADH:Ubiquinone Oxidoreductase Core Subunit 4L | Protein Coding | 28 | GCMTP010472 | 26.34 |
| IL1RN | Interleukin 1 Receptor Antagonist | Protein Coding | 48 | GC02P115307 | 26.33 |
| GADD45A | Growth Arrest And DNA Damage Inducible Alpha | Protein Coding | 44 | GC01P067685 | 26.31 |
| DNMT3B | DNA Methyltransferase 3 Beta | Protein Coding | 50 | GC20P032762 | 26.28 |
| CCR6 | C-C Motif Chemokine Receptor 6 | Protein Coding | 44 | GC06P167111 | 26.27 |
| RAD54B | RAD54 Homolog B | Protein Coding | 42 | GC08M094371 | 26.25 |
| PIK3R3 | Phosphoinositide-3-Kinase Regulatory Subunit 3 | Protein Coding | 43 | GC01M046041 | 26.19 |
| BAD | BCL2 Associated Agonist Of Cell Death | Protein Coding | 46 | GC11M064273 | 26.11 |
| GRB2 | Growth Factor Receptor Bound Protein 2 | Protein Coding | 49 | GC17M075318 | 26 |
| ANXA5 | Annexin A5 | Protein Coding | 46 | GC04M121667 | 25.97 |
| MIR30A | MicroRNA 30a | RNA Gene | 20 | GC06M071403 | 25.96 |
| FOXO1 | Forkhead Box O1 | Protein Coding | 48 | GC13M040555 | 25.93 |
| TIMP2 | TIMP Metallopeptidase Inhibitor 2 | Protein Coding | 44 | GC17M078852 | 25.92 |
| THBS1 | Thrombospondin 1 | Protein Coding | 44 | GC15P039581 | 25.86 |
| EPHA3 | EPH Receptor A3 | Protein Coding | 45 | GC03P089077 | 25.84 |
| SERPINA3 | Serpin Family A Member 3 | Protein Coding | 43 | GC14P094612 | 25.81 |
| NAT2 | N-Acetyltransferase 2 | Protein Coding | 43 | GC08P018391 | 25.8 |
| COLCA1 | Colorectal Cancer Associated 1 | RNA Gene | 22 | GC11M111290 | 25.75 |
| PRKD1 | Protein Kinase D1 | Protein Coding | 50 | GC14M029576 | 25.74 |
| UCA1 | Urothelial Cancer Associated 1 | RNA Gene | 24 | GC19P015828 | 25.71 |
| PVT1 | Pvt1 Oncogene | RNA Gene | 25 | GC08P127804 | 25.71 |
| H2AC18 | H2A Clustered Histone 18 | Protein Coding | 26 | GC01M149961 | 25.69 |
| CRCS7 | Colorectal Cancer, Susceptibility To, 7 | Genetic Locus | 2 | GC11U901214 | 25.69 |
| CRCS8 | Colorectal Cancer, Susceptibility To, 8 | Genetic Locus | 2 | GC14U900916 | 25.69 |
| PLK1 | Polo Like Kinase 1 | Protein Coding | 49 | GC16P023888 | 25.56 |
| CTSB | Cathepsin B | Protein Coding | 51 | GC08M011842 | 25.53 |
| AHR | Aryl Hydrocarbon Receptor | Protein Coding | 48 | GC07P016916 | 25.46 |
| MAPK14 | Mitogen-Activated Protein Kinase 14 | Protein Coding | 51 | GC06P047451 | 25.4 |
| CDKN2B-AS1 | CDKN2B Antisense RNA 1 | RNA Gene | 21 | GC09P021994 | 25.38 |
| IL4 | Interleukin 4 | Protein Coding | 46 | GC05P132673 | 25.3 |
| JAK1 | Janus Kinase 1 | Protein Coding | 50 | GC01M064833 | 25.3 |
| PRKCA | Protein Kinase C Alpha | Protein Coding | 50 | GC17P066302 | 25.24 |
| SUFU | SUFU Negative Regulator Of Hedgehog Signaling | Protein Coding | 43 | GC10P102503 | 25.02 |
| MUC6 | Mucin 6, Oligomeric Mucus/Gel-Forming | Protein Coding | 37 | GC11M001002 | 24.93 |
| CTBP1 | C-Terminal Binding Protein 1 | Protein Coding | 47 | GC04M001211 | 24.91 |
| MIR146B | MicroRNA 146b | RNA Gene | 19 | GC10P102436 | 24.91 |
| KRT18 | Keratin 18 | Protein Coding | 48 | GC12P052948 | 24.83 |
| IFNA1 | Interferon Alpha 1 | Protein Coding | 39 | GC09P021494 | 24.79 |
| SI | Sucrase-Isomaltase | Protein Coding | 43 | GC03M164978 | 24.77 |
| SDHC | Succinate Dehydrogenase Complex Subunit C | Protein Coding | 44 | GC01P161314 | 24.55 |
| GAS5 | Growth Arrest Specific 5 | RNA Gene | 23 | GC01M173947 | 24.55 |
| MUC4 | Mucin 4, Cell Surface Associated | Protein Coding | 38 | GC03M195746 | 24.52 |
| MUC2 | Mucin 2, Oligomeric Mucus/Gel-Forming | Protein Coding | 38 | GC11P001074 | 24.51 |
| CCAT2 | Colon Cancer Associated Transcript 2 | RNA Gene | 13 | GC08P127400 | 24.44 |
| BMI1 | BMI1 Proto-Oncogene, Polycomb Ring Finger | Protein Coding | 43 | GC10P022326 | 24.37 |
| PTPRJ | Protein Tyrosine Phosphatase Receptor Type J | Protein Coding | 45 | GC11P048002 | 24.36 |
| HLA-B | Major Histocompatibility Complex, Class I, B | Protein Coding | 45 | GC06M031315 | 24.36 |
| MAP2K4 | Mitogen-Activated Protein Kinase Kinase 4 | Protein Coding | 46 | GC17P012020 | 24.35 |
| VWF | Von Willebrand Factor | Protein Coding | 48 | GC12M005917 | 24.26 |
| MIR9-1 | MicroRNA 9-1 | RNA Gene | 20 | GC01M156420 | 24.24 |
| HDAC1 | Histone Deacetylase 1 | Protein Coding | 49 | GC01P032292 | 24.15 |
| TLR9 | Toll Like Receptor 9 | Protein Coding | 45 | GC03M052222 | 24.09 |
| IFNA2 | Interferon Alpha 2 | Protein Coding | 41 | GC09M021384 | 24.07 |
| DHFR | Dihydrofolate Reductase | Protein Coding | 49 | GC05M080626 | 23.99 |
| CTSD | Cathepsin D | Protein Coding | 52 | GC11M001752 | 23.99 |
| PTPRT | Protein Tyrosine Phosphatase Receptor Type T | Protein Coding | 41 | GC20M042072 | 23.97 |
| MMP11 | Matrix Metallopeptidase 11 | Protein Coding | 45 | GC22P023768 | 23.96 |
| CASC2 | Cancer Susceptibility 2 | RNA Gene | 25 | GC10P118046 | 23.95 |
| RHO | Rhodopsin | Protein Coding | 47 | GC03P130619 | 23.94 |
| MMP3 | Matrix Metallopeptidase 3 | Protein Coding | 51 | GC11M102835 | 23.81 |
| VEGFD | Vascular Endothelial Growth Factor D | Protein Coding | 34 | GC0XM015345 | 23.77 |
| MIR149 | MicroRNA 149 | RNA Gene | 21 | GC02P240456 | 23.68 |
| IL17A | Interleukin 17A | Protein Coding | 42 | GC06P052186 | 23.66 |
| CCAT1 | Colon Cancer Associated Transcript 1 | RNA Gene | 14 | GC08M127207 | 23.64 |
| BCL2L11 | BCL2 Like 11 | Protein Coding | 45 | GC02P111119 | 23.61 |
| PTPN12 | Protein Tyrosine Phosphatase Non-Receptor Type 12 | Protein Coding | 45 | GC07P077537 | 23.61 |
| SERPINE1 | Serpin Family E Member 1 | Protein Coding | 50 | GC07P101127 | 23.6 |
| NEAT1 | Nuclear Paraspeckle Assembly Transcript 1 | RNA Gene | 23 | GC11P065794 | 23.57 |
| TNFRSF10A | TNF Receptor Superfamily Member 10a | Protein Coding | 45 | GC08M023190 | 23.56 |
| CCKBR | Cholecystokinin B Receptor | Protein Coding | 44 | GC11P006259 | 23.5 |
| GRP | Gastrin Releasing Peptide | Protein Coding | 41 | GC18P059220 | 23.5 |
| CDH2 | Cadherin 2 | Protein Coding | 50 | GC18M027950 | 23.46 |
| EPHA2 | EPH Receptor A2 | Protein Coding | 52 | GC01M016124 | 23.46 |
| SOX5 | SRY-Box Transcription Factor 5 | Protein Coding | 46 | GC12M023529 | 23.44 |
| CFLAR | CASP8 And FADD Like Apoptosis Regulator | Protein Coding | 46 | GC02P201117 | 23.41 |
| CDH3 | Cadherin 3 | Protein Coding | 47 | GC16P068637 | 23.39 |
| PCAT1 | Prostate Cancer Associated Transcript 1 | RNA Gene | 17 | GC08P126553 | 23.37 |
| FOXO3 | Forkhead Box O3 | Protein Coding | 44 | GC06P108559 | 23.36 |
| GAPDH | Glyceraldehyde-3-Phosphate Dehydrogenase | Protein Coding | 48 | GC12P008161 | 23.36 |
| SIRT1 | Sirtuin 1 | Protein Coding | 49 | GC10P067884 | 23.32 |
| IFI27 | Interferon Alpha Inducible Protein 27 | Protein Coding | 37 | GC14P094104 | 23.18 |
| PGR | Progesterone Receptor | Protein Coding | 50 | GC11M100943 | 23.11 |
| RUNX3 | RUNX Family Transcription Factor 3 | Protein Coding | 43 | GC01M024899 | 23.11 |
| KLK3 | Kallikrein Related Peptidase 3 | Protein Coding | 46 | GC19P050854 | 23.1 |
| NRP1 | Neuropilin 1 | Protein Coding | 47 | GC10M033177 | 23.09 |
| GDF15 | Growth Differentiation Factor 15 | Protein Coding | 41 | GC19P023329 | 23.04 |
| VHL | Von Hippel-Lindau Tumor Suppressor | Protein Coding | 47 | GC03P010211 | 23.04 |
| DAPK1 | Death Associated Protein Kinase 1 | Protein Coding | 48 | GC09P087497 | 23 |
| LGALS3 | Galectin 3 | Protein Coding | 44 | GC14P055124 | 22.95 |
| CCND3 | Cyclin D3 | Protein Coding | 47 | GC06M041934 | 22.94 |
| SERPINB5 | Serpin Family B Member 5 | Protein Coding | 43 | GC18P063476 | 22.88 |
| IL6R | Interleukin 6 Receptor | Protein Coding | 48 | GC01P154405 | 22.88 |
| MTA1 | Metastasis Associated 1 | Protein Coding | 42 | GC14P105419 | 22.72 |
| MIR185 | MicroRNA 185 | RNA Gene | 21 | GC22P020034 | 22.65 |
| CD34 | CD34 Molecule | Protein Coding | 43 | GC01M207880 | 22.63 |
| APEX1 | Apurinic/Apyrimidinic Endodeoxyribonuclease 1 | Protein Coding | 45 | GC14P020455 | 22.61 |
| CDC42 | Cell Division Cycle 42 | Protein Coding | 51 | GC01P022057 | 22.59 |
| TUG1 | Taurine Up-Regulated 1 | RNA Gene | 22 | GC22P030969 | 22.59 |
| S100A4 | S100 Calcium Binding Protein A4 | Protein Coding | 44 | GC01M153543 | 22.51 |
| WNT3A | Wnt Family Member 3A | Protein Coding | 47 | GC01P228127 | 22.5 |
| MIR139 | MicroRNA 139 | RNA Gene | 19 | GC11M072615 | 22.49 |
| FOLH1 | Folate Hydrolase 1 | Protein Coding | 46 | GC11M061160 | 22.48 |
| CA9 | Carbonic Anhydrase 9 | Protein Coding | 44 | GC09P035673 | 22.47 |
| MIR196A1 | MicroRNA 196a-1 | RNA Gene | 19 | GC17M048632 | 22.44 |
| LOX | Lysyl Oxidase | Protein Coding | 44 | GC05M122063 | 22.44 |
| KRT8 | Keratin 8 | Protein Coding | 47 | GC12M052897 | 22.41 |
| HDAC9 | Histone Deacetylase 9 | Protein Coding | 46 | GC07P018086 | 22.41 |
| CYP2E1 | Cytochrome P450 Family 2 Subfamily E Member 1 | Protein Coding | 45 | GC10P133520 | 22.34 |
| XIST | X Inactive Specific Transcript | RNA Gene | 24 | GC0XM073820 | 22.32 |
| PDCD4 | Programmed Cell Death 4 | Protein Coding | 43 | GC10P110871 | 22.29 |
| COMT | Catechol-O-Methyltransferase | Protein Coding | 51 | GC22P019941 | 22.21 |
| EZR | Ezrin | Protein Coding | 45 | GC06M158765 | 22.09 |
| TGFB3 | Transforming Growth Factor Beta 3 | Protein Coding | 47 | GC14M075958 | 21.99 |
| FASN | Fatty Acid Synthase | Protein Coding | 49 | GC17M082078 | 21.99 |
| CDKN1C | Cyclin Dependent Kinase Inhibitor 1C | Protein Coding | 47 | GC11M002887 | 21.93 |
| PXN | Paxillin | Protein Coding | 45 | GC12M120210 | 21.82 |
| CD82 | CD82 Molecule | Protein Coding | 43 | GC11P044586 | 21.81 |
| NAT1 | N-Acetyltransferase 1 | Protein Coding | 44 | GC08P018179 | 21.77 |
| GAST | Gastrin | Protein Coding | 40 | GC17P041712 | 21.74 |
| NTRK3 | Neurotrophic Receptor Tyrosine Kinase 3 | Protein Coding | 51 | GC15M087859 | 21.72 |
| CRNDE | Colorectal Neoplasia Differentially Expressed | Protein Coding | 21 | GC16M054845 | 21.71 |
| MUC12 | Mucin 12, Cell Surface Associated | Protein Coding | 31 | GC07P100969 | 21.7 |
| CYP3A4 | Cytochrome P450 Family 3 Subfamily A Member 4 | Protein Coding | 48 | GC07M099759 | 21.7 |
| SPRY4-IT1 | SPRY4 Intronic Transcript 1 | RNA Gene | 14 | GC05M142318 | 21.65 |
| DDIT3 | DNA Damage Inducible Transcript 3 | Protein Coding | 45 | GC12M057516 | 21.59 |
| ALDH2 | Aldehyde Dehydrogenase 2 Family Member | Protein Coding | 50 | GC12P111766 | 21.57 |
| E2F4 | E2F Transcription Factor 4 | Protein Coding | 45 | GC16P067192 | 21.56 |
| CASP7 | Caspase 7 | Protein Coding | 50 | GC10P113679 | 21.46 |
| PPARD | Peroxisome Proliferator Activated Receptor Delta | Protein Coding | 47 | GC06P047433 | 21.45 |
| PTGS1 | Prostaglandin-Endoperoxide Synthase 1 | Protein Coding | 46 | GC09P122370 | 21.39 |
| TEK | TEK Receptor Tyrosine Kinase | Protein Coding | 50 | GC09P027109 | 21.38 |
| EPHX1 | Epoxide Hydrolase 1 | Protein Coding | 47 | GC01P225810 | 21.37 |
| F2 | Coagulation Factor II, Thrombin | Protein Coding | 48 | GC11P046720 | 21.25 |
| TCF3 | Transcription Factor 3 | Protein Coding | 45 | GC19M001609 | 21.25 |
| CTNND1 | Catenin Delta 1 | Protein Coding | 45 | GC11P057788 | 21.24 |
| HMGB1 | High Mobility Group Box 1 | Protein Coding | 44 | GC13M030456 | 21.23 |
| LINC-ROR | Long Intergenic Non-Protein Coding RNA, Regulator Of Reprogramming | RNA Gene | 16 | GC18M057054 | 21.2 |
| BECN1 | Beclin 1 | Protein Coding | 46 | GC17M042810 | 21.18 |
| BIRC3 | Baculoviral IAP Repeat Containing 3 | Protein Coding | 46 | GC11P102317 | 21.14 |
| WNT6 | Wnt Family Member 6 | Protein Coding | 41 | GC02P218859 | 21.14 |
| EXO1 | Exonuclease 1 | Protein Coding | 43 | GC01P241847 | 21.14 |
| ALDH1A1 | Aldehyde Dehydrogenase 1 Family Member A1 | Protein Coding | 47 | GC09M072900 | 21.11 |
| PTGER4 | Prostaglandin E Receptor 4 | Protein Coding | 46 | GC05P040679 | 21.08 |
| MIR193B | MicroRNA 193b | RNA Gene | 20 | GC16P014307 | 21.06 |
| FSCN1 | Fascin Actin-Bundling Protein 1 | Protein Coding | 43 | GC07P005592 | 21.05 |
| PECAM1 | Platelet And Endothelial Cell Adhesion Molecule 1 | Protein Coding | 40 | GC17M064319 | 21.04 |
| EREG | Epiregulin | Protein Coding | 41 | GC04P074366 | 21.01 |
| FOXM1 | Forkhead Box M1 | Protein Coding | 44 | GC12M002857 | 20.99 |
| ST14 | ST14 Transmembrane Serine Protease Matriptase | Protein Coding | 45 | GC11P130159 | 20.95 |
| WNT2 | Wnt Family Member 2 | Protein Coding | 44 | GC07M117276 | 20.94 |
| HSPA4 | Heat Shock Protein Family A (Hsp70) Member 4 | Protein Coding | 41 | GC05P133051 | 20.91 |
| PKM | Pyruvate Kinase M1/2 | Protein Coding | 45 | GC15M072199 | 20.88 |
| MAPK9 | Mitogen-Activated Protein Kinase 9 | Protein Coding | 48 | GC05M180234 | 20.85 |
| LRP6 | LDL Receptor Related Protein 6 | Protein Coding | 48 | GC12M013893 | 20.82 |
| HSPA5 | Heat Shock Protein Family A (Hsp70) Member 5 | Protein Coding | 47 | GC09M125234 | 20.79 |
| MIR124-1 | MicroRNA 124-1 | RNA Gene | 21 | GC08M009903 | 20.78 |
| NCAM1 | Neural Cell Adhesion Molecule 1 | Protein Coding | 45 | GC11P112961 | 20.76 |
| CD8A | CD8a Molecule | Protein Coding | 46 | GC02M086784 | 20.75 |
| FZD7 | Frizzled Class Receptor 7 | Protein Coding | 44 | GC02P202034 | 20.74 |
| KLF4 | Kruppel Like Factor 4 | Protein Coding | 45 | GC09M107484 | 20.68 |
| WNT8B | Wnt Family Member 8B | Protein Coding | 41 | GC10P100463 | 20.68 |
| ILK | Integrin Linked Kinase | Protein Coding | 46 | GC11P006581 | 20.65 |
| DKK1 | Dickkopf WNT Signaling Pathway Inhibitor 1 | Protein Coding | 45 | GC10P052314 | 20.63 |
| CD4 | CD4 Molecule | Protein Coding | 49 | GC12P006786 | 20.63 |
| ANXA2 | Annexin A2 | Protein Coding | 48 | GC15M060347 | 20.63 |
| JUP | Junction Plakoglobin | Protein Coding | 47 | GC17M041754 | 20.61 |
| WNT3 | Wnt Family Member 3 | Protein Coding | 46 | GC17M046762 | 20.58 |
| ZFAS1 | ZNFX1 Antisense RNA 1 | RNA Gene | 18 | GC20P049276 | 20.52 |
| MIR338 | MicroRNA 338 | RNA Gene | 17 | GC17M081126 | 20.44 |
| EGR1 | Early Growth Response 1 | Protein Coding | 44 | GC05P138465 | 20.42 |
| LGALS3BP | Galectin 3 Binding Protein | Protein Coding | 41 | GC17M078971 | 20.41 |
| ELAVL1 | ELAV Like RNA Binding Protein 1 | Protein Coding | 41 | GC19M007958 | 20.41 |
| CCNE1 | Cyclin E1 | Protein Coding | 48 | GC19P029811 | 20.37 |
| SOCS1 | Suppressor Of Cytokine Signaling 1 | Protein Coding | 43 | GC16M011255 | 20.36 |
| SFRP1 | Secreted Frizzled Related Protein 1 | Protein Coding | 43 | GC08M041238 | 20.29 |
| HOTTIP | HOXA Distal Transcript Antisense RNA | RNA Gene | 22 | GC07P027198 | 20.28 |
| TCF7L1 | Transcription Factor 7 Like 1 | Protein Coding | 41 | GC02P085133 | 20.19 |
| TCF7 | Transcription Factor 7 | Protein Coding | 44 | GC05P134114 | 20.16 |
| ITGAV | Integrin Subunit Alpha V | Protein Coding | 46 | GC02P186589 | 20.12 |
| IFNB1 | Interferon Beta 1 | Protein Coding | 41 | GC09M021077 | 20.11 |
| XPC | XPC Complex Subunit, DNA Damage Recognition And Repair Factor | Protein Coding | 45 | GC03M015787 | 20.1 |
| PAX3 | Paired Box 3 | Protein Coding | 47 | GC02M222199 | 20.09 |
| UHRF1 | Ubiquitin Like With PHD And Ring Finger Domains 1 | Protein Coding | 40 | GC19P004910 | 20.08 |
| DIABLO | Diablo IAP-Binding Mitochondrial Protein | Protein Coding | 47 | GC12M122208 | 20 |
| HULC | Hepatocellular Carcinoma Up-Regulated Long Non-Coding RNA | RNA Gene | 21 | GC06P008438 | 19.99 |
| CXCL1 | C-X-C Motif Chemokine Ligand 1 | Protein Coding | 43 | GC04P073869 | 19.97 |
| TPX2 | TPX2 Microtubule Nucleation Factor | Protein Coding | 41 | GC20P031739 | 19.97 |
| TP63 | Tumor Protein P63 | Protein Coding | 48 | GC03P189598 | 19.94 |
| WNT10B | Wnt Family Member 10B | Protein Coding | 48 | GC12M048965 | 19.91 |
| AGBL5 | ATP/GTP Binding Protein Like 5 | Protein Coding | 39 | GC02P027016 | 19.9 |
| CDX1 | Caudal Type Homeobox 1 | Protein Coding | 36 | GC05P150133 | 19.9 |
| IGFBP2 | Insulin Like Growth Factor Binding Protein 2 | Protein Coding | 43 | GC02P216632 | 19.88 |
| PTPN13 | Protein Tyrosine Phosphatase Non-Receptor Type 13 | Protein Coding | 43 | GC04P086594 | 19.84 |
| TGM2 | Transglutaminase 2 | Protein Coding | 48 | GC20M038127 | 19.83 |
| PDPN | Podoplanin | Protein Coding | 40 | GC01P013583 | 19.74 |
| MIR324 | MicroRNA 324 | RNA Gene | 18 | GC17M007223 | 19.73 |
| SNHG16 | Small Nucleolar RNA Host Gene 16 | RNA Gene | 17 | GC17P076559 | 19.71 |
| HLA-DRB1 | Major Histocompatibility Complex, Class II, DR Beta 1 | Protein Coding | 46 | GC06M032578 | 19.68 |
| CYP19A1 | Cytochrome P450 Family 19 Subfamily A Member 1 | Protein Coding | 48 | GC15M051208 | 19.67 |
| CEACAM6 | CEA Cell Adhesion Molecule 6 | Protein Coding | 40 | GC19P041750 | 19.65 |
| ICOSLG | Inducible T Cell Costimulator Ligand | Protein Coding | 39 | GC21M044222 | 19.63 |
| CEACAM3 | CEA Cell Adhesion Molecule 3 | Protein Coding | 40 | GC19P041796 | 19.54 |
| LASP1 | LIM And SH3 Protein 1 | Protein Coding | 42 | GC17P038869 | 19.53 |
| LGALS1 | Galectin 1 | Protein Coding | 43 | GC22P037675 | 19.52 |
| CYTOR | Cytoskeleton Regulator RNA | RNA Gene | 17 | GC02P087460 | 19.52 |
| CASP2 | Caspase 2 | Protein Coding | 49 | GC07P144979 | 19.51 |
| PDGFD | Platelet Derived Growth Factor D | Protein Coding | 44 | GC11M103907 | 19.47 |
| BAG1 | BAG Cochaperone 1 | Protein Coding | 43 | GC09M033245 | 19.44 |
| RECK | Reversion Inducing Cysteine Rich Protein With Kazal Motifs | Protein Coding | 40 | GC09P036036 | 19.43 |
| DVL1 | Dishevelled Segment Polarity Protein 1 | Protein Coding | 47 | GC01M001335 | 19.43 |
| MAPK10 | Mitogen-Activated Protein Kinase 10 | Protein Coding | 51 | GC04M085990 | 19.39 |
| MAP3K6 | Mitogen-Activated Protein Kinase Kinase Kinase 6 | Protein Coding | 44 | GC01M027365 | 19.38 |
| MAP2K5 | Mitogen-Activated Protein Kinase Kinase 5 | Protein Coding | 46 | GC15P072885 | 19.37 |
| SYNE1 | Spectrin Repeat Containing Nuclear Envelope Protein 1 | Protein Coding | 41 | GC06M152121 | 19.36 |
| GSTT1 | Glutathione S-Transferase Theta 1 | Protein Coding | 32 | GC22Mi00270 | 19.35 |
| TG | Thyroglobulin | Protein Coding | 42 | GC08P132866 | 19.33 |
| DANCR | Differentiation Antagonizing Non-Protein Coding RNA | RNA Gene | 21 | GC04P052712 | 19.32 |
| FADD | Fas Associated Via Death Domain | Protein Coding | 47 | GC11P070203 | 19.31 |
| NOS3 | Nitric Oxide Synthase 3 | Protein Coding | 51 | GC07P150990 | 19.3 |
| H2AX | H2A.X Variant Histone | Protein Coding | 35 | GC11M119097 | 19.3 |
| GZMB | Granzyme B | Protein Coding | 45 | GC14M024630 | 19.29 |
| TKT | Transketolase | Protein Coding | 46 | GC03M053224 | 19.26 |
| ITGB4 | Integrin Subunit Beta 4 | Protein Coding | 48 | GC17P075721 | 19.24 |
| RALA | RAS Like Proto-Oncogene A | Protein Coding | 45 | GC07P039622 | 19.24 |
| MINPP1 | Multiple Inositol-Polyphosphate Phosphatase 1 | Protein Coding | 45 | GC10P087504 | 19.21 |
| ATRX | ATRX Chromatin Remodeler | Protein Coding | 45 | GC0XM077504 | 19.17 |
| PIK3CG | Phosphatidylinositol-4,5-Bisphosphate 3-Kinase Catalytic Subunit Gamma | Protein Coding | 48 | GC07P106865 | 19.15 |
| E2F2 | E2F Transcription Factor 2 | Protein Coding | 42 | GC01M023527 | 19.09 |
| TMEFF2 | Transmembrane Protein With EGF Like And Two Follistatin Like Domains 2 | Protein Coding | 39 | GC02M191950 | 19.07 |
| MIR497 | MicroRNA 497 | RNA Gene | 17 | GC17M007022 | 19.06 |
| MIR92A1 | MicroRNA 92a-1 | RNA Gene | 19 | GC13P091431 | 19.06 |
| PTPA | Protein Phosphatase 2 Phosphatase Activator | Protein Coding | 35 | GC09P129111 | 19.04 |
| CEACAM7 | CEA Cell Adhesion Molecule 7 | Protein Coding | 37 | GC19M041673 | 19.01 |
| XRCC6 | X-Ray Repair Cross Complementing 6 | Protein Coding | 45 | GC22P041622 | 18.99 |
| CHGA | Chromogranin A | Protein Coding | 42 | GC14P092923 | 18.98 |
| ALOX12 | Arachidonate 12-Lipoxygenase, 12S Type | Protein Coding | 43 | GC17P006995 | 18.98 |
| CXCR2 | C-X-C Motif Chemokine Receptor 2 | Protein Coding | 48 | GC02P218125 | 18.96 |
| HOXA11-AS | HOXA11 Antisense RNA | RNA Gene | 20 | GC07P027184 | 18.96 |
| PANDAR | Promoter Of CDKN1A Antisense DNA Damage Activated RNA | RNA Gene | 12 | GC06M036673 | 18.95 |
| EPHB6 | EPH Receptor B6 | Protein Coding | 44 | GC07P144968 | 18.93 |
| MELK | Maternal Embryonic Leucine Zipper Kinase | Protein Coding | 45 | GC09P036572 | 18.93 |
| UROD | Uroporphyrinogen Decarboxylase | Protein Coding | 45 | GC01P045012 | 18.89 |
| FANCC | FA Complementation Group C | Protein Coding | 47 | GC09M095099 | 18.87 |
| AFAP1-AS1 | AFAP1 Antisense RNA 1 | RNA Gene | 17 | GC04P007756 | 18.81 |
| WNT10A | Wnt Family Member 10A | Protein Coding | 45 | GC02P218880 | 18.81 |
| TNFRSF9 | TNF Receptor Superfamily Member 9 | Protein Coding | 44 | GC01M007915 | 18.81 |
| TIAM1 | TIAM Rac1 Associated GEF 1 | Protein Coding | 44 | GC21M031118 | 18.8 |
| MIR455 | MicroRNA 455 | RNA Gene | 18 | GC09P114209 | 18.78 |
| MIR27B | MicroRNA 27b | RNA Gene | 21 | GC09P095097 | 18.76 |
| KMT2C | Lysine Methyltransferase 2C | Protein Coding | 41 | GC07M152134 | 18.75 |
| AMACR | Alpha-Methylacyl-CoA Racemase | Protein Coding | 45 | GC05M033986 | 18.75 |
| EIF2B2 | Eukaryotic Translation Initiation Factor 2B Subunit Beta | Protein Coding | 44 | GC14P075002 | 18.71 |
| NTRK2 | Neurotrophic Receptor Tyrosine Kinase 2 | Protein Coding | 53 | GC09P084668 | 18.66 |
| MACC1 | MET Transcriptional Regulator MACC1 | Protein Coding | 36 | GC07M020140 | 18.61 |
| MIR135A1 | MicroRNA 135a-1 | RNA Gene | 20 | GC03M052296 | 18.59 |
| PSG2 | Pregnancy Specific Beta-1-Glycoprotein 2 | Protein Coding | 35 | GC19M043064 | 18.59 |
| MIR24-1 | MicroRNA 24-1 | RNA Gene | 18 | GC09P095086 | 18.59 |
| PROS1 | Protein S | Protein Coding | 47 | GC03M093873 | 18.57 |
| CD80 | CD80 Molecule | Protein Coding | 41 | GC03M119524 | 18.54 |
| XRCC5 | X-Ray Repair Cross Complementing 5 | Protein Coding | 44 | GC02P216107 | 18.54 |
| SNHG1 | Small Nucleolar RNA Host Gene 1 | RNA Gene | 21 | GC11M063444 | 18.53 |
| RAD54L | RAD54 Like | Protein Coding | 45 | GC01P046258 | 18.52 |
| CYP24A1 | Cytochrome P450 Family 24 Subfamily A Member 1 | Protein Coding | 47 | GC20M054153 | 18.51 |
| WNT16 | Wnt Family Member 16 | Protein Coding | 41 | GC07P121325 | 18.51 |
| LIFR | LIF Receptor Subunit Alpha | Protein Coding | 47 | GC05M038475 | 18.5 |
| GRPR | Gastrin Releasing Peptide Receptor | Protein Coding | 42 | GC0XP016141 | 18.46 |
| SLC29A1 | Solute Carrier Family 29 Member 1 (Augustine Blood Group) | Protein Coding | 48 | GC06P044219 | 18.4 |
| BCAR4 | Breast Cancer Anti-Estrogen Resistance 4 | RNA Gene | 17 | GC16M011819 | 18.4 |
| ITGA2 | Integrin Subunit Alpha 2 | Protein Coding | 45 | GC05P052989 | 18.38 |
| FOSL1 | FOS Like 1, AP-1 Transcription Factor Subunit | Protein Coding | 44 | GC11M065909 | 18.37 |
| TP53COR1 | Tumor Protein P53 Pathway Corepressor 1 | RNA Gene | 8 | GC06U903133 | 18.35 |
| SYP | Synaptophysin | Protein Coding | 43 | GC0XM049187 | 18.34 |
| SOX2-OT | SOX2 Overlapping Transcript | RNA Gene | 21 | GC03P180989 | 18.28 |
| DPEP1 | Dipeptidase 1 | Protein Coding | 42 | GC16P089613 | 18.26 |
| CEACAM1 | CEA Cell Adhesion Molecule 1 | Protein Coding | 43 | GC19M042507 | 18.2 |
| PTTG1 | PTTG1 Regulator Of Sister Chromatid Separation, Securin | Protein Coding | 43 | GC05P160422 | 18.14 |
| RUNX1T1 | RUNX1 Partner Transcriptional Co-Repressor 1 | Protein Coding | 39 | GC08M091954 | 18.13 |
| BCYRN1 | Brain Cytoplasmic RNA 1 | RNA Gene | 18 | GC02P047331 | 18.1 |
| GFAP | Glial Fibrillary Acidic Protein | Protein Coding | 47 | GC17M044905 | 18.08 |
| PHLPP1 | PH Domain And Leucine Rich Repeat Protein Phosphatase 1 | Protein Coding | 40 | GC18P062715 | 18.06 |
| SULT1A1 | Sulfotransferase Family 1A Member 1 | Protein Coding | 43 | GC16M028606 | 18.03 |
| TUBB2A | Tubulin Beta 2A Class IIa | Protein Coding | 45 | GC06M003153 | 18.01 |
| CDC25C | Cell Division Cycle 25C | Protein Coding | 48 | GC05M138285 | 18 |
| CYP1A2 | Cytochrome P450 Family 1 Subfamily A Member 2 | Protein Coding | 45 | GC15P074748 | 17.98 |
| ASS1 | Argininosuccinate Synthase 1 | Protein Coding | 48 | GC09P130444 | 17.98 |
| SAT1 | Spermidine/Spermine N1-Acetyltransferase 1 | Protein Coding | 45 | GC0XP023784 | 17.97 |
| NAMPT | Nicotinamide Phosphoribosyltransferase | Protein Coding | 48 | GC07M106248 | 17.94 |
| LRP1 | LDL Receptor Related Protein 1 | Protein Coding | 47 | GC12P057128 | 17.92 |
| SDHA | Succinate Dehydrogenase Complex Flavoprotein Subunit A | Protein Coding | 46 | GC05P000208 | 17.91 |
| ENO2 | Enolase 2 | Protein Coding | 47 | GC12P006913 | 17.89 |
| MORC2 | MORC Family CW-Type Zinc Finger 2 | Protein Coding | 40 | GC22M030925 | 17.87 |
| FAN1 | FANCD2 And FANCI Associated Nuclease 1 | Protein Coding | 37 | GC15P031408 | 17.82 |
| BANCR | BRAF-Activated Non-Protein Coding RNA | RNA Gene | 12 | GC09M069296 | 17.79 |
| TNS4 | Tensin 4 | Protein Coding | 38 | GC17M040475 | 17.79 |
| TNFRSF10D | TNF Receptor Superfamily Member 10d | Protein Coding | 43 | GC08M023135 | 17.79 |
| LGR6 | Leucine Rich Repeat Containing G Protein-Coupled Receptor 6 | Protein Coding | 41 | GC01P202193 | 17.76 |
| MIR135B | MicroRNA 135b | RNA Gene | 19 | GC01M205448 | 17.74 |
| WNT7A | Wnt Family Member 7A | Protein Coding | 49 | GC03M015784 | 17.71 |
| SERPINB2 | Serpin Family B Member 2 | Protein Coding | 44 | GC18P063871 | 17.67 |
| PDCD1 | Programmed Cell Death 1 | Protein Coding | 48 | GC02M241849 | 17.64 |
| REG4 | Regenerating Family Member 4 | Protein Coding | 40 | GC01M119794 | 17.63 |
| MIR301A | MicroRNA 301a | RNA Gene | 18 | GC17M059151 | 17.63 |
| MIR130B | MicroRNA 130b | RNA Gene | 17 | GC22P024903 | 17.6 |
| STS | Steroid Sulfatase | Protein Coding | 44 | GC0XP007146 | 17.6 |
| HSP90B1 | Heat Shock Protein 90 Beta Family Member 1 | Protein Coding | 45 | GC12P103930 | 17.58 |
| HLA-G | Major Histocompatibility Complex, Class I, G | Protein Coding | 44 | GC06P047256 | 17.57 |
| MIR31HG | MIR31 Host Gene | RNA Gene | 18 | GC09M021439 | 17.56 |
| E2F3 | E2F Transcription Factor 3 | Protein Coding | 43 | GC06P020402 | 17.53 |
| SOX2 | SRY-Box Transcription Factor 2 | Protein Coding | 47 | GC03P181711 | 17.53 |
| TXN | Thioredoxin | Protein Coding | 45 | GC09M110243 | 17.53 |
| MAP2K7 | Mitogen-Activated Protein Kinase Kinase 7 | Protein Coding | 45 | GC19P007903 | 17.52 |
| HLA-C | Major Histocompatibility Complex, Class I, C | Protein Coding | 44 | GC06M031272 | 17.52 |
| PHLPP2 | PH Domain And Leucine Rich Repeat Protein Phosphatase 2 | Protein Coding | 41 | GC16M071637 | 17.48 |
| BLACAT1 | Bladder Cancer Associated Transcript 1 | RNA Gene | 14 | GC01M205434 | 17.48 |
| IL15 | Interleukin 15 | Protein Coding | 40 | GC04P141636 | 17.47 |
| KAT5 | Lysine Acetyltransferase 5 | Protein Coding | 46 | GC11P065711 | 17.47 |
| WNT9A | Wnt Family Member 9A | Protein Coding | 41 | GC01M227920 | 17.47 |
| BBC3 | BCL2 Binding Component 3 | Protein Coding | 41 | GC19M047220 | 17.46 |
| CLDN1 | Claudin 1 | Protein Coding | 47 | GC03M190305 | 17.46 |
| ZNF217 | Zinc Finger Protein 217 | Protein Coding | 39 | GC20M053567 | 17.41 |
| MYB | MYB Proto-Oncogene, Transcription Factor | Protein Coding | 50 | GC06P135180 | 17.4 |
| KDM4C | Lysine Demethylase 4C | Protein Coding | 40 | GC09P006720 | 17.4 |
| WNT11 | Wnt Family Member 11 | Protein Coding | 45 | GC11M076186 | 17.38 |
| PTENP1 | Phosphatase And Tensin Homolog Pseudogene 1 | Pseudogene | 20 | GC09M033673 | 17.35 |
| NCOA3 | Nuclear Receptor Coactivator 3 | Protein Coding | 45 | GC20P047501 | 17.33 |
| SLCO1B3 | Solute Carrier Organic Anion Transporter Family Member 1B3 | Protein Coding | 44 | GC12P020810 | 17.3 |
| CASC8 | Cancer Susceptibility 8 | RNA Gene | 15 | GC08M127933 | 17.25 |
| EIF4EBP1 | Eukaryotic Translation Initiation Factor 4E Binding Protein 1 | Protein Coding | 47 | GC08P038007 | 17.25 |
| CD24 | CD24 Molecule | Protein Coding | 33 | GC06M106969 | 17.25 |
| PRMT1 | Protein Arginine Methyltransferase 1 | Protein Coding | 48 | GC19P049675 | 17.24 |
| PIK3R5 | Phosphoinositide-3-Kinase Regulatory Subunit 5 | Protein Coding | 45 | GC17M008878 | 17.22 |
| SEPTIN9 | Septin 9 | Protein Coding | 35 | GC17P077282 | 17.22 |
| MIR542 | MicroRNA 542 | RNA Gene | 17 | GC0XM134630 | 17.19 |
| MAP2K3 | Mitogen-Activated Protein Kinase Kinase 3 | Protein Coding | 49 | GC17P026749 | 17.17 |
| CLCA2 | Chloride Channel Accessory 2 | Protein Coding | 41 | GC01P086424 | 17.15 |
| GHET1 | Gastric Carcinoma Proliferation Enhancing Transcript 1 | RNA Gene | 10 | GC07P149026 | 17.15 |
| SELE | Selectin E | Protein Coding | 44 | GC01M169722 | 17.14 |
| SFRP2 | Secreted Frizzled Related Protein 2 | Protein Coding | 42 | GC04M153780 | 17.12 |
| SHH | Sonic Hedgehog Signaling Molecule | Protein Coding | 50 | GC07M155799 | 17.12 |
| LGR5 | Leucine Rich Repeat Containing G Protein-Coupled Receptor 5 | Protein Coding | 43 | GC12P071439 | 17.11 |
| NTS | Neurotensin | Protein Coding | 40 | GC12P085876 | 17.1 |
| MUC5B | Mucin 5B, Oligomeric Mucus/Gel-Forming | Protein Coding | 41 | GC11P001244 | 17.06 |
| LNCRNA-ATB | Long Noncoding RNA Activated By TGF-Beta | RNA Gene | 4 | GC14P019509 | 17.05 |
| PMAIP1 | Phorbol-12-Myristate-13-Acetate-Induced Protein 1 | Protein Coding | 39 | GC18P059899 | 17.01 |
| RECQL4 | RecQ Like Helicase 4 | Protein Coding | 41 | GC08M144512 | 17.01 |
| PSMA7 | Proteasome 20S Subunit Alpha 7 | Protein Coding | 44 | GC20M062136 | 17.01 |
| UMPS | Uridine Monophosphate Synthetase | Protein Coding | 45 | GC03P124730 | 17 |
| MIR345 | MicroRNA 345 | RNA Gene | 19 | GC14P100307 | 16.99 |
| FZD8 | Frizzled Class Receptor 8 | Protein Coding | 43 | GC10M035638 | 16.96 |
| CDCP1 | CUB Domain Containing Protein 1 | Protein Coding | 39 | GC03M045082 | 16.95 |
| MUC7 | Mucin 7, Secreted | Protein Coding | 37 | GC04P070430 | 16.94 |
| USP28 | Ubiquitin Specific Peptidase 28 | Protein Coding | 40 | GC11M113797 | 16.93 |
| MIRLET7F1 | MicroRNA Let-7f-1 | RNA Gene | 18 | GC09P094193 | 16.89 |
| TDGF1 | Teratocarcinoma-Derived Growth Factor 1 | Protein Coding | 41 | GC03P046576 | 16.85 |
| RALGDS | Ral Guanine Nucleotide Dissociation Stimulator | Protein Coding | 41 | GC09M133097 | 16.82 |
| MMP12 | Matrix Metallopeptidase 12 | Protein Coding | 44 | GC11M102862 | 16.81 |
| MIR378A | MicroRNA 378a | RNA Gene | 18 | GC05P149732 | 16.8 |
| ALCAM | Activated Leukocyte Cell Adhesion Molecule | Protein Coding | 42 | GC03P105366 | 16.77 |
| PTPRU | Protein Tyrosine Phosphatase Receptor Type U | Protein Coding | 41 | GC01P029236 | 16.76 |
| CYP27B1 | Cytochrome P450 Family 27 Subfamily B Member 1 | Protein Coding | 47 | GC12M057757 | 16.7 |
| WWOX | WW Domain Containing Oxidoreductase | Protein Coding | 47 | GC16P078099 | 16.67 |
| MTHFD1L | Methylenetetrahydrofolate Dehydrogenase (NADP+ Dependent) 1 Like | Protein Coding | 41 | GC06P150865 | 16.67 |
| ATR | ATR Serine/Threonine Kinase | Protein Coding | 51 | GC03M142449 | 16.65 |
| WNT5B | Wnt Family Member 5B | Protein Coding | 44 | GC12P001529 | 16.65 |
| ATF3 | Activating Transcription Factor 3 | Protein Coding | 44 | GC01P212565 | 16.64 |
| HNF1A-AS1 | HNF1A Antisense RNA 1 | RNA Gene | 18 | GC12M121052 | 16.63 |
| MDM4 | MDM4 Regulator Of P53 | Protein Coding | 43 | GC01P204516 | 16.62 |
| IGFBP7 | Insulin Like Growth Factor Binding Protein 7 | Protein Coding | 45 | GC04M057030 | 16.61 |
| CDH13 | Cadherin 13 | Protein Coding | 42 | GC16P082626 | 16.6 |
| FGFR4 | Fibroblast Growth Factor Receptor 4 | Protein Coding | 51 | GC05P177086 | 16.58 |
| TLR7 | Toll Like Receptor 7 | Protein Coding | 46 | GC0XP012867 | 16.57 |
| CSE1L | Chromosome Segregation 1 Like | Protein Coding | 40 | GC20P049046 | 16.56 |
| TINCR | TINCR Ubiquitin Domain Containing | RNA Gene | 24 | GC19M005558 | 16.48 |
| PTP4A1 | Protein Tyrosine Phosphatase 4A1 | Protein Coding | 41 | GC06P063521 | 16.47 |
| TUSC7 | Tumor Suppressor Candidate 7 | RNA Gene | 16 | GC03P116709 | 16.47 |
| NORAD | Non-Coding RNA Activated By DNA Damage | RNA Gene | 14 | GC20M036054 | 16.45 |
| SHC1 | SHC Adaptor Protein 1 | Protein Coding | 45 | GC01M154962 | 16.44 |
| TFF3 | Trefoil Factor 3 | Protein Coding | 41 | GC21M042311 | 16.43 |
| SNHG12 | Small Nucleolar RNA Host Gene 12 | RNA Gene | 22 | GC01M028578 | 16.43 |
| FZD10 | Frizzled Class Receptor 10 | Protein Coding | 44 | GC12P130162 | 16.43 |
| PLK4 | Polo Like Kinase 4 | Protein Coding | 47 | GC04P127880 | 16.42 |
| PTGER2 | Prostaglandin E Receptor 2 | Protein Coding | 48 | GC14P052314 | 16.4 |
| NNT-AS1 | NNT Antisense RNA 1 | RNA Gene | 14 | GC05M043603 | 16.4 |
| FZD3 | Frizzled Class Receptor 3 | Protein Coding | 43 | GC08P028494 | 16.39 |
| HOXA-AS2 | HOXA Cluster Antisense RNA 2 | RNA Gene | 17 | GC07P027107 | 16.3 |
| ACTG2 | Actin Gamma 2, Smooth Muscle | Protein Coding | 45 | GC02P073892 | 16.29 |
| MIR625 | MicroRNA 625 | RNA Gene | 14 | GC14P065471 | 16.28 |
| WIF1 | WNT Inhibitory Factor 1 | Protein Coding | 45 | GC12M065050 | 16.28 |
| HDAC2 | Histone Deacetylase 2 | Protein Coding | 51 | GC06M113933 | 16.27 |
| CSK | C-Terminal Src Kinase | Protein Coding | 48 | GC15P074782 | 16.26 |
| ATG5 | Autophagy Related 5 | Protein Coding | 44 | GC06M106045 | 16.24 |
| STUB1 | STIP1 Homology And U-Box Containing Protein 1 | Protein Coding | 45 | GC16P001405 | 16.22 |
| TLR1 | Toll Like Receptor 1 | Protein Coding | 47 | GC04M038797 | 16.22 |
| WRAP53 | WD Repeat Containing Antisense To TP53 | Protein Coding | 41 | GC17P008049 | 16.2 |
| CSF1 | Colony Stimulating Factor 1 | Protein Coding | 43 | GC01P109911 | 16.2 |
| PRNCR1 | Prostate Cancer Associated Non-Coding RNA 1 | RNA Gene | 14 | GC08P127079 | 16.19 |
| SNHG20 | Small Nucleolar RNA Host Gene 20 | RNA Gene | 17 | GC17P077087 | 16.18 |
| LINC01194 | Long Intergenic Non-Protein Coding RNA 1194 | RNA Gene | 17 | GC05P012578 | 16.16 |
| WNT7B | Wnt Family Member 7B | Protein Coding | 43 | GC22M045920 | 16.14 |
| PRKCZ | Protein Kinase C Zeta | Protein Coding | 48 | GC01P002050 | 16.12 |
| ACSL5 | Acyl-CoA Synthetase Long Chain Family Member 5 | Protein Coding | 42 | GC10P112374 | 16.11 |
| SEC23B | SEC23 Homolog B, COPII Coat Complex Component | Protein Coding | 43 | GC20P018507 | 16.1 |
| CCN4 | Cellular Communication Network Factor 4 | Protein Coding | 31 | GC08P133192 | 16.1 |
| CD86 | CD86 Molecule | Protein Coding | 43 | GC03P122055 | 16.09 |
| TPBG | Trophoblast Glycoprotein | Protein Coding | 39 | GC06P082363 | 16.07 |
| MUC3A | Mucin 3A, Cell Surface Associated | Protein Coding | 34 | GC07P100949 | 16.07 |
| SLC5A8 | Solute Carrier Family 5 Member 8 | Protein Coding | 42 | GC12M101155 | 16.05 |
| CSMD3 | CUB And Sushi Multiple Domains 3 | Protein Coding | 35 | GC08M112223 | 16.02 |
| LGALS4 | Galectin 4 | Protein Coding | 38 | GC19M042441 | 16 |
| FZD1 | Frizzled Class Receptor 1 | Protein Coding | 45 | GC07P091264 | 16 |
| SNAI2 | Snail Family Transcriptional Repressor 2 | Protein Coding | 44 | GC08M048854 | 15.97 |
| SLC16A7 | Solute Carrier Family 16 Member 7 | Protein Coding | 43 | GC12P059596 | 15.96 |
| CBR3-AS1 | CBR3 Antisense RNA 1 | RNA Gene | 16 | GC21M036131 | 15.96 |
| MTHFD1 | Methylenetetrahydrofolate Dehydrogenase, Cyclohydrolase And Formyltetrahydrofolate Synthetase 1 | Protein Coding | 44 | GC14P064388 | 15.88 |
| AKAP12 | A-Kinase Anchoring Protein 12 | Protein Coding | 40 | GC06P151239 | 15.88 |
| APRT | Adenine Phosphoribosyltransferase | Protein Coding | 47 | GC16M088810 | 15.86 |
| SST | Somatostatin | Protein Coding | 42 | GC03M187668 | 15.84 |
| DLEC1 | DLEC1 Cilia And Flagella Associated Protein | Protein Coding | 36 | GC03P038038 | 15.83 |
| ETV6 | ETS Variant Transcription Factor 6 | Protein Coding | 46 | GC12P011649 | 15.75 |
| SNHG5 | Small Nucleolar RNA Host Gene 5 | RNA Gene | 19 | GC06M085650 | 15.74 |
| GUCY2C | Guanylate Cyclase 2C | Protein Coding | 45 | GC12M014612 | 15.73 |
| RRM2 | Ribonucleotide Reductase Regulatory Subunit M2 | Protein Coding | 48 | GC02P010123 | 15.71 |
| CACNA1G | Calcium Voltage-Gated Channel Subunit Alpha1 G | Protein Coding | 48 | GC17P050561 | 15.69 |
| NFATC1 | Nuclear Factor Of Activated T Cells 1 | Protein Coding | 47 | GC18P079395 | 15.66 |
| TLR10 | Toll Like Receptor 10 | Protein Coding | 40 | GC04M038773 | 15.66 |
| LINC00472 | Long Intergenic Non-Protein Coding RNA 472 | RNA Gene | 22 | GC06M071344 | 15.64 |
| MIR490 | MicroRNA 490 | RNA Gene | 16 | GC07P136903 | 15.63 |
| SETDB1 | SET Domain Bifurcated Histone Lysine Methyltransferase 1 | Protein Coding | 41 | GC01P150926 | 15.6 |
| QKI | QKI, KH Domain Containing RNA Binding | Protein Coding | 43 | GC06P163414 | 15.6 |
| CASP5 | Caspase 5 | Protein Coding | 44 | GC11M104995 | 15.58 |
| MAD1L1 | Mitotic Arrest Deficient 1 Like 1 | Protein Coding | 45 | GC07M001815 | 15.58 |
| SELP | Selectin P | Protein Coding | 45 | GC01M169558 | 15.57 |
| ABL1 | ABL Proto-Oncogene 1, Non-Receptor Tyrosine Kinase | Protein Coding | 52 | GC09P130713 | 15.56 |
| ARRB1 | Arrestin Beta 1 | Protein Coding | 43 | GC11M075261 | 15.55 |
| HLTF | Helicase Like Transcription Factor | Protein Coding | 39 | GC03M149030 | 15.53 |
| MAPRE1 | Microtubule Associated Protein RP/EB Family Member 1 | Protein Coding | 44 | GC20P032819 | 15.53 |
| MIR103A1 | MicroRNA 103a-1 | RNA Gene | 17 | GC05M168560 | 15.52 |
| RALB | RAS Like Proto-Oncogene B | Protein Coding | 45 | GC02P120240 | 15.51 |
| NTN1 | Netrin 1 | Protein Coding | 44 | GC17P009021 | 15.5 |
| ZFP36L1 | ZFP36 Ring Finger Protein Like 1 | Protein Coding | 43 | GC14M068787 | 15.5 |
| RNY1 | RNA, Ro60-Associated Y1 | RNA Gene | 15 | GC07M148987 | 15.48 |
| RNY3 | RNA, Ro60-Associated Y3 | RNA Gene | 14 | GC07P149006 | 15.48 |
| EVL | Enah/Vasp-Like | Protein Coding | 38 | GC14P099971 | 15.47 |
| ACVR2A | Activin A Receptor Type 2A | Protein Coding | 45 | GC02P147844 | 15.44 |
| RASSF2 | Ras Association Domain Family Member 2 | Protein Coding | 41 | GC20M004780 | 15.44 |
| ABCB5 | ATP Binding Cassette Subfamily B Member 5 | Protein Coding | 42 | GC07P020615 | 15.44 |
| LINC00261 | Long Intergenic Non-Protein Coding RNA 261 | RNA Gene | 18 | GC20M022547 | 15.42 |
| DUXAP9 | Double Homeobox A Pseudogene 9 | Pseudogene | 8 | GC14P019474 | 15.41 |
| CLCA1 | Chloride Channel Accessory 1 | Protein Coding | 40 | GC01P086468 | 15.39 |
| MIR148A | MicroRNA 148a | RNA Gene | 18 | GC07M025993 | 15.37 |
| POT1 | Protection Of Telomeres 1 | Protein Coding | 43 | GC07M124822 | 15.37 |
| CCL2 | C-C Motif Chemokine Ligand 2 | Protein Coding | 48 | GC17P034255 | 15.32 |
| ZFP36L2 | ZFP36 Ring Finger Protein Like 2 | Protein Coding | 37 | GC02M043184 | 15.31 |
| PPARA | Peroxisome Proliferator Activated Receptor Alpha | Protein Coding | 45 | GC22P046150 | 15.29 |
| CYP2C9 | Cytochrome P450 Family 2 Subfamily C Member 9 | Protein Coding | 48 | GC10P094938 | 15.28 |
| EIF4G1 | Eukaryotic Translation Initiation Factor 4 Gamma 1 | Protein Coding | 45 | GC03P184314 | 15.24 |
| MNX1-AS1 | MNX1 Antisense RNA 1 (Head To Head) | RNA Gene | 16 | GC07P157010 | 15.21 |
| HSPA8 | Heat Shock Protein Family A (Hsp70) Member 8 | Protein Coding | 47 | GC11M123057 | 15.21 |
| ITGA6 | Integrin Subunit Alpha 6 | Protein Coding | 49 | GC02P172427 | 15.19 |
| ITGA5 | Integrin Subunit Alpha 5 | Protein Coding | 48 | GC12M054396 | 15.14 |
| RPL6 | Ribosomal Protein L6 | Protein Coding | 39 | GC12M112320 | 15.12 |
| EIF4E | Eukaryotic Translation Initiation Factor 4E | Protein Coding | 50 | GC04M098871 | 15.12 |
| SCG5 | Secretogranin V | Protein Coding | 38 | GC15P032641 | 15.11 |
| CD248 | CD248 Molecule | Protein Coding | 39 | GC11M066314 | 15.09 |
| FCGR3A | Fc Fragment Of IgG Receptor IIIa | Protein Coding | 44 | GC01M161541 | 15.08 |
| GPX2 | Glutathione Peroxidase 2 | Protein Coding | 44 | GC14M064939 | 15.08 |
| ZEB1-AS1 | ZEB1 Antisense RNA 1 | RNA Gene | 16 | GC10M031166 | 15.06 |
| MIR675 | MicroRNA 675 | RNA Gene | 17 | GC11M001997 | 15.05 |
| LCK | LCK Proto-Oncogene, Src Family Tyrosine Kinase | Protein Coding | 52 | GC01P032251 | 15.03 |
| MME | Membrane Metalloendopeptidase | Protein Coding | 50 | GC03P155024 | 15.01 |
| MIR339 | MicroRNA 339 | RNA Gene | 19 | GC07M001022 | 14.97 |
| TLR6 | Toll Like Receptor 6 | Protein Coding | 44 | GC04M038828 | 14.96 |
| TLR8 | Toll Like Receptor 8 | Protein Coding | 47 | GC0XP012924 | 14.96 |
| LINC00858 | Long Intergenic Non-Protein Coding RNA 858 | RNA Gene | 14 | GC10P084279 | 14.95 |
| SRSF6 | Serine And Arginine Rich Splicing Factor 6 | Protein Coding | 39 | GC20P043457 | 14.93 |
| FEZF1-AS1 | FEZF1 Antisense RNA 1 | RNA Gene | 15 | GC07P122303 | 14.92 |
| PALLD | Palladin, Cytoskeletal Associated Protein | Protein Coding | 42 | GC04P168497 | 14.91 |
| MBD4 | Methyl-CpG Binding Domain 4, DNA Glycosylase | Protein Coding | 42 | GC03M129430 | 14.9 |
| MIR210 | MicroRNA 210 | RNA Gene | 21 | GC11M000674 | 14.88 |
| ADORA3 | Adenosine A3 Receptor | Protein Coding | 45 | GC01M111499 | 14.85 |
| ANTXR1 | ANTXR Cell Adhesion Molecule 1 | Protein Coding | 46 | GC02P068977 | 14.8 |
| FUT4 | Fucosyltransferase 4 | Protein Coding | 36 | GC11P094544 | 14.79 |
| ADORA1 | Adenosine A1 Receptor | Protein Coding | 47 | GC01P203090 | 14.78 |
| NCR1 | Natural Cytotoxicity Triggering Receptor 1 | Protein Coding | 37 | GC19P054906 | 14.77 |
| PPM1D | Protein Phosphatase, Mg2+/Mn2+ Dependent 1D | Protein Coding | 47 | GC17P060600 | 14.74 |
| GCNT3 | Glucosaminyl (N-Acetyl) Transferase 3, Mucin Type | Protein Coding | 38 | GC15P059594 | 14.7 |
| POLE2 | DNA Polymerase Epsilon 2, Accessory Subunit | Protein Coding | 42 | GC14M049643 | 14.68 |
| TAGLN | Transgelin | Protein Coding | 43 | GC11P117199 | 14.67 |
| ALDOA | Aldolase, Fructose-Bisphosphate A | Protein Coding | 48 | GC16P030064 | 14.59 |
| EIF5A2 | Eukaryotic Translation Initiation Factor 5A2 | Protein Coding | 40 | GC03M170888 | 14.56 |
| ZNF148 | Zinc Finger Protein 148 | Protein Coding | 40 | GC03M125225 | 14.55 |
| AGO2 | Argonaute RISC Catalytic Component 2 | Protein Coding | 39 | GC08M140522 | 14.54 |
| TJP1 | Tight Junction Protein 1 | Protein Coding | 43 | GC15M029699 | 14.52 |
| SNHG6 | Small Nucleolar RNA Host Gene 6 | RNA Gene | 16 | GC08M066921 | 14.51 |
| LINC01133 | Long Intergenic Non-Protein Coding RNA 1133 | RNA Gene | 14 | GC01P159933 | 14.5 |
| LINC00460 | Long Intergenic Non-Protein Coding RNA 460 | RNA Gene | 16 | GC13P106376 | 14.49 |
| MIR423 | MicroRNA 423 | RNA Gene | 18 | GC17P030117 | 14.43 |
| CSF1R | Colony Stimulating Factor 1 Receptor | Protein Coding | 52 | GC05M150053 | 14.39 |
| FPGS | Folylpolyglutamate Synthase | Protein Coding | 43 | GC09P127794 | 14.34 |
| DCLK1 | Doublecortin Like Kinase 1 | Protein Coding | 43 | GC13M035768 | 14.33 |
| SELL | Selectin L | Protein Coding | 42 | GC01M169690 | 14.32 |
| PTPRG | Protein Tyrosine Phosphatase Receptor Type G | Protein Coding | 41 | GC03P061522 | 14.32 |
| SF3A1 | Splicing Factor 3a Subunit 1 | Protein Coding | 39 | GC22M030331 | 14.29 |
| NPTN-IT1 | NPTN Intronic Transcript 1 | RNA Gene | 12 | GC15M073566 | 14.29 |
| FAT4 | FAT Atypical Cadherin 4 | Protein Coding | 40 | GC04P125315 | 14.27 |
| IRF1 | Interferon Regulatory Factor 1 | Protein Coding | 47 | GC05M132481 | 14.27 |
| SLIT2 | Slit Guidance Ligand 2 | Protein Coding | 45 | GC04P020287 | 14.24 |
| MUC20 | Mucin 20, Cell Surface Associated | Protein Coding | 37 | GC03P195720 | 14.16 |
| XPA | XPA, DNA Damage Recognition And Repair Factor | Protein Coding | 45 | GC09M097635 | 14.16 |
| GNRH1 | Gonadotropin Releasing Hormone 1 | Protein Coding | 41 | GC08M025419 | 14.14 |
| GGT1 | Gamma-Glutamyltransferase 1 | Protein Coding | 46 | GC22P024927 | 14.14 |
| AGR2 | Anterior Gradient 2, Protein Disulphide Isomerase Family Member | Protein Coding | 40 | GC07M016832 | 14.11 |
| HOXB8 | Homeobox B8 | Protein Coding | 36 | GC17M048611 | 14.11 |
| MUC17 | Mucin 17, Cell Surface Associated | Protein Coding | 35 | GC07P101020 | 14.1 |
| GSDME | Gasdermin E | Protein Coding | 31 | GC07M024699 | 14.09 |
| USF3 | Upstream Transcription Factor Family Member 3 | Protein Coding | 26 | GC03M113649 | 14.08 |
| CAT | Catalase | Protein Coding | 50 | GC11P034460 | 14.08 |
| OTOP2 | Otopetrin 2 | Protein Coding | 31 | GC17P074924 | 14.06 |
| DEAF1 | DEAF1 Transcription Factor | Protein Coding | 40 | GC11M000644 | 14.06 |
| FLNA | Filamin A | Protein Coding | 49 | GC0XM154348 | 14.05 |
| MIR422A | MicroRNA 422a | RNA Gene | 16 | GC15M063870 | 14.04 |
| ING1 | Inhibitor Of Growth Family Member 1 | Protein Coding | 43 | GC13P110712 | 14.04 |
| APC2 | APC Regulator Of WNT Signaling Pathway 2 | Protein Coding | 40 | GC19P001494 | 14.03 |
| TFDP1 | Transcription Factor Dp-1 | Protein Coding | 44 | GC13P113584 | 13.95 |
| SATB2 | SATB Homeobox 2 | Protein Coding | 44 | GC02M199269 | 13.95 |
| TMEM238L | Transmembrane Protein 238 Like | RNA Gene | 14 | GC17M010795 | 13.94 |
| RARA | Retinoic Acid Receptor Alpha | Protein Coding | 50 | GC17P040309 | 13.88 |
| HNF1B | HNF1 Homeobox B | Protein Coding | 44 | GC17M037686 | 13.88 |
| NUAK1 | NUAK Family Kinase 1 | Protein Coding | 43 | GC12M106063 | 13.86 |
| GJA1 | Gap Junction Protein Alpha 1 | Protein Coding | 50 | GC06P121436 | 13.85 |
| TH | Tyrosine Hydroxylase | Protein Coding | 51 | GC11M002163 | 13.82 |
| TFE3 | Transcription Factor Binding To IGHM Enhancer 3 | Protein Coding | 43 | GC0XM049028 | 13.81 |
| MIR129-2 | MicroRNA 129-2 | RNA Gene | 18 | GC11P043640 | 13.8 |
| ZFHX3 | Zinc Finger Homeobox 3 | Protein Coding | 41 | GC16M072782 | 13.78 |
| SHBG | Sex Hormone Binding Globulin | Protein Coding | 40 | GC17P007613 | 13.75 |
| HIF1A-AS1 | HIF1A Antisense RNA 1 | RNA Gene | 15 | GC14M061681 | 13.74 |
| LLGL1 | LLGL Scribble Cell Polarity Complex Component 1 | Protein Coding | 39 | GC17P018225 | 13.68 |
| MIR204 | MicroRNA 204 | RNA Gene | 21 | GC09M070809 | 13.68 |
| DLK1 | Delta Like Non-Canonical Notch Ligand 1 | Protein Coding | 44 | GC14P104663 | 13.67 |
| FURIN | Furin, Paired Basic Amino Acid Cleaving Enzyme | Protein Coding | 46 | GC15P090868 | 13.67 |
| ANGPT2 | Angiopoietin 2 | Protein Coding | 44 | GC08M006499 | 13.65 |
| CHSY1 | Chondroitin Sulfate Synthase 1 | Protein Coding | 43 | GC15M101175 | 13.62 |
| DPP10-AS1 | DPP10 Antisense RNA 1 | RNA Gene | 14 | GC02M115130 | 13.61 |
| PTGES2 | Prostaglandin E Synthase 2 | Protein Coding | 43 | GC09M128120 | 13.61 |
| FUT3 | Fucosyltransferase 3 (Lewis Blood Group) | Protein Coding | 43 | GC19M005843 | 13.57 |
| SPINK1 | Serine Peptidase Inhibitor Kazal Type 1 | Protein Coding | 43 | GC05M147825 | 13.56 |
| ANXA1 | Annexin A1 | Protein Coding | 49 | GC09P073151 | 13.55 |
| H4-16 | H4 Histone 16 | Protein Coding | 33 | GC12M014768 | 13.54 |
| NR0B2 | Nuclear Receptor Subfamily 0 Group B Member 2 | Protein Coding | 43 | GC01M026922 | 13.52 |
| BID | BH3 Interacting Domain Death Agonist | Protein Coding | 45 | GC22M017734 | 13.47 |
| DUXAP10 | Double Homeobox A Pseudogene 10 | Pseudogene | 10 | GC14M019294 | 13.47 |
| ST6GAL1 | ST6 Beta-Galactoside Alpha-2,6-Sialyltransferase 1 | Protein Coding | 43 | GC03P186930 | 13.46 |
| MIR95 | MicroRNA 95 | RNA Gene | 16 | GC04M008007 | 13.45 |
| CD40LG | CD40 Ligand | Protein Coding | 47 | GC0XP136649 | 13.41 |
| PRKN | Parkin RBR E3 Ubiquitin Protein Ligase | Protein Coding | 40 | GC06M161348 | 13.4 |
| PRKACA | Protein Kinase CAMP-Activated Catalytic Subunit Alpha | Protein Coding | 51 | GC19M014092 | 13.4 |
| PDGFB | Platelet Derived Growth Factor Subunit B | Protein Coding | 50 | GC22M045657 | 13.39 |
| NOTCH3 | Notch Receptor 3 | Protein Coding | 49 | GC19M015159 | 13.38 |
| MAX | MYC Associated Factor X | Protein Coding | 48 | GC14M065009 | 13.35 |
| CALB2 | Calbindin 2 | Protein Coding | 40 | GC16P071392 | 13.32 |
| NPM1 | Nucleophosmin 1 | Protein Coding | 50 | GC05P171387 | 13.31 |
| TMSB4X | Thymosin Beta 4 X-Linked | Protein Coding | 40 | GC0XP012975 | 13.3 |
| UGT1A6 | UDP Glucuronosyltransferase Family 1 Member A6 | Protein Coding | 40 | GC02P233691 | 13.29 |
| CASC11 | Cancer Susceptibility 11 | RNA Gene | 15 | GC08M127944 | 13.19 |
| GAPLINC | Gastric Adenocarcinoma Associated, Positive CD44 Regulator, Long Intergenic Non-Coding RNA | RNA Gene | 14 | GC18P003467 | 13.16 |
| GPA33 | Glycoprotein A33 | Protein Coding | 39 | GC01M167052 | 13.15 |
| EBAG9 | Estrogen Receptor Binding Site Associated Antigen 9 | Protein Coding | 38 | GC08P109536 | 13.15 |
| FER1L4 | Fer-1 Like Family Member 4 (Pseudogene) | Pseudogene | 22 | GC20M035558 | 13.13 |
| PAEP | Progestagen Associated Endometrial Protein | Protein Coding | 39 | GC09P135561 | 13.13 |
| CREBBP | CREB Binding Protein | Protein Coding | 52 | GC16M003726 | 13.12 |
| MGAT5 | Alpha-1,6-Mannosylglycoprotein 6-Beta-N-Acetylglucosaminyltransferase | Protein Coding | 39 | GC02P134119 | 13.11 |
| VIM | Vimentin | Protein Coding | 50 | GC10P017227 | 13.09 |
| RPL34-DT | RPL34 Divergent Transcript | RNA Gene | 16 | GC04M108539 | 13.09 |
| SOD2 | Superoxide Dismutase 2 | Protein Coding | 51 | GC06M159669 | 13.07 |
| PRDM10 | PR/SET Domain 10 | Protein Coding | 34 | GC11M129899 | 13.06 |
| PHB | Prohibitin | Protein Coding | 47 | GC17M049404 | 13.05 |
| PAX8 | Paired Box 8 | Protein Coding | 46 | GC02M113215 | 13.05 |
| S100A6 | S100 Calcium Binding Protein A6 | Protein Coding | 43 | GC01M153535 | 13.05 |
| CLDN4 | Claudin 4 | Protein Coding | 41 | GC07P073799 | 13.01 |
| PSMB7 | Proteasome 20S Subunit Beta 7 | Protein Coding | 45 | GC09M124353 | 13.01 |
| IL7 | Interleukin 7 | Protein Coding | 42 | GC08M078689 | 12.97 |
| EPHB4 | EPH Receptor B4 | Protein Coding | 52 | GC07M100803 | 12.95 |
| TK1 | Thymidine Kinase 1 | Protein Coding | 46 | GC17M078175 | 12.95 |
| CDKN2C | Cyclin Dependent Kinase Inhibitor 2C | Protein Coding | 45 | GC01P050960 | 12.93 |
| KITLG | KIT Ligand | Protein Coding | 44 | GC12M088492 | 12.92 |
| DNAJC6 | DnaJ Heat Shock Protein Family (Hsp40) Member C6 | Protein Coding | 43 | GC01P065248 | 12.9 |
| BCL6 | BCL6 Transcription Repressor | Protein Coding | 45 | GC03M187721 | 12.88 |
| ENPP7 | Ectonucleotide Pyrophosphatase/Phosphodiesterase 7 | Protein Coding | 38 | GC17P079730 | 12.88 |
| MIRLET7D | MicroRNA Let-7d | RNA Gene | 21 | GC09P094178 | 12.87 |
| AFAP1 | Actin Filament Associated Protein 1 | Protein Coding | 39 | GC04M007758 | 12.86 |
| BACE1-AS | BACE1 Antisense RNA | RNA Gene | 13 | GC11P117304 | 12.85 |
| MTAP | Methylthioadenosine Phosphorylase | Protein Coding | 47 | GC09P021792 | 12.84 |
| HOTAIRM1 | HOXA Transcript Antisense RNA, Myeloid-Specific 1 | RNA Gene | 18 | GC07P027095 | 12.82 |
| IDH2 | Isocitrate Dehydrogenase (NADP(+)) 2 | Protein Coding | 52 | GC15M090083 | 12.8 |
| FAM83H-AS1 | FAM83H Antisense RNA 1 (Head To Head) | Uncategorized | 8 | GC00U936901 | 12.79 |
| TP53TG1 | TP53 Target 1 | RNA Gene | 22 | GC07M087325 | 12.79 |
| REEP5 | Receptor Accessory Protein 5 | Protein Coding | 39 | GC05M112876 | 12.78 |
| DMBT1 | Deleted In Malignant Brain Tumors 1 | Protein Coding | 40 | GC10P122560 | 12.77 |
| SOX9 | SRY-Box Transcription Factor 9 | Protein Coding | 47 | GC17P072121 | 12.75 |
| MIR7-3 | MicroRNA 7-3 | RNA Gene | 17 | GC19P004770 | 12.73 |
| HEIH | Hepatocellular Carcinoma Up-Regulated EZH2-Associated Long Non-Coding RNA | RNA Gene | 14 | GC05M180826 | 12.73 |
| FGF3 | Fibroblast Growth Factor 3 | Protein Coding | 44 | GC11M069811 | 12.68 |
| B2M | Beta-2-Microglobulin | Protein Coding | 48 | GC15P044711 | 12.67 |
| PRTN3 | Proteinase 3 | Protein Coding | 44 | GC19P000840 | 12.66 |
| EDNRA | Endothelin Receptor Type A | Protein Coding | 49 | GC04P147480 | 12.66 |
| ABCC3 | ATP Binding Cassette Subfamily C Member 3 | Protein Coding | 45 | GC17P050634 | 12.63 |
| GATA3 | GATA Binding Protein 3 | Protein Coding | 49 | GC10P008045 | 12.63 |
| CSF3 | Colony Stimulating Factor 3 | Protein Coding | 40 | GC17P040015 | 12.59 |
| YES1 | YES Proto-Oncogene 1, Src Family Tyrosine Kinase | Protein Coding | 48 | GC18M000721 | 12.57 |
| NCRUPAR | Non-Protein Coding RNA, Upstream Of F2R/PAR1 | RNA Gene | 12 | GC05P076711 | 12.56 |
| SOS2 | SOS Ras/Rho Guanine Nucleotide Exchange Factor 2 | Protein Coding | 45 | GC14M050117 | 12.54 |
| TTK | TTK Protein Kinase | Protein Coding | 46 | GC06P080003 | 12.51 |
| GUCA2B | Guanylate Cyclase Activator 2B | Protein Coding | 39 | GC01P042153 | 12.5 |
| MIR16-1 | MicroRNA 16-1 | RNA Gene | 21 | GC13M050048 | 12.5 |
| POLK | DNA Polymerase Kappa | Protein Coding | 41 | GC05P075511 | 12.46 |
| MUCL1 | Mucin Like 1 | Protein Coding | 33 | GC12P054830 | 12.45 |
| TUSC8 | Tumor Suppressor Candidate 8 | RNA Gene | 12 | GC13M044400 | 12.44 |
| FTX | FTX Transcript, XIST Regulator | RNA Gene | 18 | GC0XM073946 | 12.43 |
| NOX1 | NADPH Oxidase 1 | Protein Coding | 41 | GC0XM100843 | 12.4 |
| MIR199B | MicroRNA 199b | RNA Gene | 19 | GC09M128244 | 12.39 |
| ITGB3 | Integrin Subunit Beta 3 | Protein Coding | 49 | GC17P047254 | 12.37 |
| CLMAT3 | Colorectal Liver Metastasis Associated Transcript 3 | RNA Gene | 12 | GC05P151677 | 12.35 |
| PPP2R1A | Protein Phosphatase 2 Scaffold Subunit Aalpha | Protein Coding | 47 | GC19P052189 | 12.34 |
| ENSG00000278769 |  | RNA Gene | 4 | GC15P042724 | 12.32 |
| ERCC5 | ERCC Excision Repair 5, Endonuclease | Protein Coding | 45 | GC13P102808 | 12.31 |
| MIR454 | MicroRNA 454 | RNA Gene | 18 | GC17M059137 | 12.3 |
| DNAAF2 | Dynein Axonemal Assembly Factor 2 | Protein Coding | 37 | GC14M049625 | 12.29 |
| GUCA2A | Guanylate Cyclase Activator 2A | Protein Coding | 37 | GC01M042162 | 12.28 |
| FBXO11 | F-Box Protein 11 | Protein Coding | 42 | GC02M047789 | 12.28 |
| LGALS9 | Galectin 9 | Protein Coding | 39 | GC17P027629 | 12.27 |
| CASC19 | Cancer Susceptibility 19 | RNA Gene | 14 | GC08M127932 | 12.25 |
| CLDN3 | Claudin 3 | Protein Coding | 40 | GC07M073768 | 12.22 |
| JAG1 | Jagged Canonical Notch Ligand 1 | Protein Coding | 50 | GC20M010637 | 12.21 |
| RECQL | RecQ Like Helicase | Protein Coding | 41 | GC12M021468 | 12.19 |
| ADAMTS13 | ADAM Metallopeptidase With Thrombospondin Type 1 Motif 13 | Protein Coding | 45 | GC09P133414 | 12.19 |
| BTNL2 | Butyrophilin Like 2 | Protein Coding | 39 | GC06M032393 | 12.18 |
| LAMC1-AS1 | LAMC1 Antisense RNA 1 | RNA Gene | 10 | GC01M183138 | 12.18 |
| CYP2D6 | Cytochrome P450 Family 2 Subfamily D Member 6 | Protein Coding | 48 | GC22M042126 | 12.16 |
| SGO1 | Shugoshin 1 | Protein Coding | 34 | GC03M020159 | 12.13 |
| ETV4 | ETS Variant Transcription Factor 4 | Protein Coding | 43 | GC17M043527 | 12.13 |
| DDX53 | DEAD-Box Helicase 53 | Protein Coding | 35 | GC0XP022999 | 12.08 |
| DNAH1 | Dynein Axonemal Heavy Chain 1 | Protein Coding | 37 | GC03P052350 | 12.08 |
| APOE | Apolipoprotein E | Protein Coding | 50 | GC19P044906 | 12.03 |
| CCN1 | Cellular Communication Network Factor 1 | Protein Coding | 31 | GC01P085581 | 12.01 |
| MIR186 | MicroRNA 186 | RNA Gene | 18 | GC01M071067 | 11.99 |
| MSR1 | Macrophage Scavenger Receptor 1 | Protein Coding | 46 | GC08M016107 | 11.89 |
| BDNF | Brain Derived Neurotrophic Factor | Protein Coding | 47 | GC11M027654 | 11.88 |
| MIR373 | MicroRNA 373 | RNA Gene | 20 | GC19P054634 | 11.84 |
| MIR486-1 | MicroRNA 486-1 | RNA Gene | 16 | GC08M041660 | 11.82 |
| CTAG1B | Cancer/Testis Antigen 1B | Protein Coding | 32 | GC0XM154617 | 11.78 |
| BMPR2 | Bone Morphogenetic Protein Receptor Type 2 | Protein Coding | 50 | GC02P202376 | 11.76 |
| KRT14 | Keratin 14 | Protein Coding | 47 | GC17M041582 | 11.75 |
| CDC73 | Cell Division Cycle 73 | Protein Coding | 44 | GC01P193121 | 11.75 |
| PDPK1 | 3-Phosphoinositide Dependent Protein Kinase 1 | Protein Coding | 48 | GC16P002537 | 11.74 |
| PRLR | Prolactin Receptor | Protein Coding | 48 | GC05M035048 | 11.72 |
| S100B | S100 Calcium Binding Protein B | Protein Coding | 45 | GC21M047431 | 11.68 |
| CBL | Cbl Proto-Oncogene | Protein Coding | 50 | GC11P119206 | 11.67 |
| PTPRH | Protein Tyrosine Phosphatase Receptor Type H | Protein Coding | 40 | GC19M055181 | 11.66 |
| AREL1 | Apoptosis Resistant E3 Ubiquitin Protein Ligase 1 | Protein Coding | 33 | GC14M074653 | 11.65 |
| AIP | Aryl Hydrocarbon Receptor Interacting Protein | Protein Coding | 44 | GC11P067468 | 11.65 |
| SLC22A18 | Solute Carrier Family 22 Member 18 | Protein Coding | 42 | GC11P002899 | 11.65 |
| DGCR5 | DiGeorge Syndrome Critical Region Gene 5 | RNA Gene | 20 | GC22P019556 | 11.64 |
| SLC25A25-AS1 | SLC25A25 Antisense RNA 1 | RNA Gene | 14 | GC09M128108 | 11.63 |
| PRRT2 | Proline Rich Transmembrane Protein 2 | Protein Coding | 39 | GC16P029811 | 11.62 |
| TFF1 | Trefoil Factor 1 | Protein Coding | 44 | GC21M042362 | 11.62 |
| LEF1-AS1 | LEF1 Antisense RNA 1 | RNA Gene | 16 | GC04P108167 | 11.61 |
| FBXL19-AS1 | FBXL19 Antisense RNA 1 | RNA Gene | 19 | GC16M030932 | 11.61 |
| PTPRN2 | Protein Tyrosine Phosphatase Receptor Type N2 | Protein Coding | 44 | GC07M157539 | 11.57 |
| CD40 | CD40 Molecule | Protein Coding | 48 | GC20P046118 | 11.56 |
| AIMP2 | Aminoacyl TRNA Synthetase Complex Interacting Multifunctional Protein 2 | Protein Coding | 41 | GC07P006016 | 11.53 |
| HFE | Homeostatic Iron Regulator | Protein Coding | 43 | GC06P026087 | 11.53 |
| ELAC2 | ElaC Ribonuclease Z 2 | Protein Coding | 42 | GC17M012991 | 11.5 |
| HMGA2 | High Mobility Group AT-Hook 2 | Protein Coding | 44 | GC12P065824 | 11.49 |
| MIR122 | MicroRNA 122 | RNA Gene | 21 | GC18P058451 | 11.49 |
| NDRG1 | N-Myc Downstream Regulated 1 | Protein Coding | 45 | GC08M133237 | 11.47 |
| STAT5B | Signal Transducer And Activator Of Transcription 5B | Protein Coding | 49 | GC17M042199 | 11.45 |
| SQSTM1 | Sequestosome 1 | Protein Coding | 48 | GC05P179806 | 11.42 |
| MIR181B1 | MicroRNA 181b-1 | RNA Gene | 19 | GC01M198858 | 11.41 |
| PURPL | P53 Upregulated Regulator Of P53 Levels | RNA Gene | 11 | GC05P027217 | 11.41 |
| TFAP2A | Transcription Factor AP-2 Alpha | Protein Coding | 47 | GC06M010393 | 11.4 |
| SNHG17 | Small Nucleolar RNA Host Gene 17 | RNA Gene | 17 | GC20M038420 | 11.39 |
| MLANA | Melan-A | Protein Coding | 39 | GC09P005846 | 11.38 |
| USHBP1 | USH1 Protein Network Component Harmonin Binding Protein 1 | Protein Coding | 35 | GC19M017249 | 11.37 |
| LINC00538 | Long Intergenic Non-Protein Coding RNA 538 | RNA Gene | 12 | GC01P213924 | 11.37 |
| DACOR1 | DNMT1-Associated Colon Cancer Repressed LncRNA 1 | RNA Gene | 6 | GC15U902209 | 11.36 |
| LINC00659 | Long Intergenic Non-Protein Coding RNA 659 | RNA Gene | 14 | GC20M062774 | 11.36 |
| SNHG3 | Small Nucleolar RNA Host Gene 3 | RNA Gene | 17 | GC01P028506 | 11.35 |
| ACVRL1 | Activin A Receptor Like Type 1 | Protein Coding | 50 | GC12P051906 | 11.34 |
| DDR2 | Discoidin Domain Receptor Tyrosine Kinase 2 | Protein Coding | 51 | GC01P162631 | 11.33 |
| HMOX1 | Heme Oxygenase 1 | Protein Coding | 52 | GC22P035380 | 11.3 |
| GPRC5D-AS1 | GPRC5D And HEBP1 Antisense RNA 1 | RNA Gene | 12 | GC12P012928 | 11.3 |
| MIRLET7E | MicroRNA Let-7e | RNA Gene | 20 | GC19P051718 | 11.29 |
| FOXP4-AS1 | FOXP4 Antisense RNA 1 | RNA Gene | 14 | GC06M041494 | 11.28 |
| TET2 | Tet Methylcytosine Dioxygenase 2 | Protein Coding | 44 | GC04P105145 | 11.27 |
| AOC4P | Amine Oxidase Copper Containing 4, Pseudogene | Pseudogene | 10 | GC17P042865 | 11.27 |
| STAT6 | Signal Transducer And Activator Of Transcription 6 | Protein Coding | 50 | GC12M057095 | 11.27 |
| NOTCH2 | Notch Receptor 2 | Protein Coding | 50 | GC01M119911 | 11.27 |
| VIM-AS1 | VIM Antisense RNA 1 | RNA Gene | 15 | GC10M017172 | 11.27 |
| CASP10 | Caspase 10 | Protein Coding | 48 | GC02P201182 | 11.25 |
| AFP | Alpha Fetoprotein | Protein Coding | 45 | GC04P073431 | 11.24 |
| MIRLET7C | MicroRNA Let-7c | RNA Gene | 21 | GC21P016551 | 11.21 |
| LINC01527 | Long Intergenic Non-Protein Coding RNA 1527 | RNA Gene | 11 | GC01M152930 | 11.2 |
| FANCD2 | FA Complementation Group D2 | Protein Coding | 47 | GC03P010026 | 11.2 |
| SBDSP1 | SBDS Pseudogene 1 | Pseudogene | 14 | GC07P072835 | 11.18 |
| AHI1 | Abelson Helper Integration Site 1 | Protein Coding | 41 | GC06M135283 | 11.17 |
| LINC01617 | Long Intergenic Non-Protein Coding RNA 1617 | RNA Gene | 9 | GC08P073879 | 11.17 |
| DLEU7-AS1 | DLEU7 Antisense RNA 1 | RNA Gene | 17 | GC13P050089 | 11.17 |
| PINCR | P53-Induced Noncoding RNA | RNA Gene | 10 | GC0XP043177 | 11.17 |
| CAHM | Colon Adenocarcinoma Hypermethylated | RNA Gene | 16 | GC06M163413 | 11.15 |
| MYBPC3 | Myosin Binding Protein C3 | Protein Coding | 46 | GC11M061124 | 11.14 |
| ITGA9 | Integrin Subunit Alpha 9 | Protein Coding | 43 | GC03P037468 | 11.13 |
| KLK4 | Kallikrein Related Peptidase 4 | Protein Coding | 42 | GC19M050907 | 11.13 |
| BTG3-AS1 | BTG3 Antisense RNA 1 | RNA Gene | 9 | GC21P017612 | 11.13 |
| GPC3 | Glypican 3 | Protein Coding | 45 | GC0XM133535 | 11.1 |
| LINC01630 | Long Intergenic Non-Protein Coding RNA 1630 | RNA Gene | 12 | GC18P051348 | 11.1 |
| MIR28 | MicroRNA 28 | RNA Gene | 19 | GC03P188688 | 11.09 |
| ERCC3 | ERCC Excision Repair 3, TFIIH Core Complex Helicase Subunit | Protein Coding | 47 | GC02M127257 | 11.06 |
| FLT3 | Fms Related Receptor Tyrosine Kinase 3 | Protein Coding | 52 | GC13M028003 | 11.05 |
| LINC01507 | Long Intergenic Non-Protein Coding RNA 1507 | RNA Gene | 13 | GC09P079824 | 11.04 |
| LINC01618 | Long Intergenic Non-Protein Coding RNA 1618 | RNA Gene | 12 | GC04P052726 | 11.04 |
| PRKCE | Protein Kinase C Epsilon | Protein Coding | 50 | GC02P045651 | 11.04 |
| CRYGC | Crystallin Gamma C | Protein Coding | 40 | GC02M208128 | 11.03 |
| NGF | Nerve Growth Factor | Protein Coding | 50 | GC01M115285 | 11.02 |
| AIFM1 | Apoptosis Inducing Factor Mitochondria Associated 1 | Protein Coding | 49 | GC0XM130129 | 11 |
| INHA | Inhibin Subunit Alpha | Protein Coding | 43 | GC02P219569 | 10.99 |
| IGFBP1 | Insulin Like Growth Factor Binding Protein 1 | Protein Coding | 43 | GC07P046552 | 10.98 |
| MIR206 | MicroRNA 206 | RNA Gene | 20 | GC06P052144 | 10.98 |
| CDC20 | Cell Division Cycle 20 | Protein Coding | 44 | GC01P043358 | 10.97 |
| MIR574 | MicroRNA 574 | RNA Gene | 18 | GC04P038872 | 10.93 |
| UNC93A | Unc-93 Homolog A | Protein Coding | 35 | GC06P167271 | 10.93 |
| SKP2 | S-Phase Kinase Associated Protein 2 | Protein Coding | 44 | GC05P036103 | 10.91 |
| LINC-PINT | Long Intergenic Non-Protein Coding RNA, P53 Induced Transcript | RNA Gene | 17 | GC07M130899 | 10.9 |
| LINC01567 | Long Intergenic Non-Protein Coding RNA 1567 | RNA Gene | 14 | GC16M024661 | 10.89 |
| POU5F1P4 | POU Class 5 Homeobox 1 Pseudogene 4 | Pseudogene | 16 | GC01P155444 | 10.89 |
| CADM1 | Cell Adhesion Molecule 1 | Protein Coding | 43 | GC11M115169 | 10.87 |
| ESRRA | Estrogen Related Receptor Alpha | Protein Coding | 47 | GC11P064305 | 10.86 |
| ACE | Angiotensin I Converting Enzyme | Protein Coding | 49 | GC17P063477 | 10.84 |
| CHL1 | Cell Adhesion Molecule L1 Like | Protein Coding | 39 | GC03P000213 | 10.83 |
| ERG | ETS Transcription Factor ERG | Protein Coding | 45 | GC21M038367 | 10.81 |
| FGF8 | Fibroblast Growth Factor 8 | Protein Coding | 47 | GC10M101770 | 10.8 |
| GSEC | G-Quadruplex Forming Sequence Containing LncRNA | RNA Gene | 12 | GC11M126340 | 10.8 |
| PRKCD | Protein Kinase C Delta | Protein Coding | 53 | GC03P053156 | 10.79 |
| FOXG1 | Forkhead Box G1 | Protein Coding | 43 | GC14P028766 | 10.78 |
| DLGAP4-AS1 | DLGAP4 Antisense RNA 1 | RNA Gene | 13 | GC20M036507 | 10.78 |
| MIR331 | MicroRNA 331 | RNA Gene | 18 | GC12P095308 | 10.78 |
| MAMDC2-AS1 | MAMDC2 Antisense RNA 1 | RNA Gene | 13 | GC09M070036 | 10.75 |
| C10orf143 | Chromosome 10 Open Reading Frame 143 | Protein Coding | 13 | GC10M130020 | 10.75 |
| NRG1 | Neuregulin 1 | Protein Coding | 46 | GC08P031639 | 10.72 |
| SOX21-AS1 | SOX21 Antisense Divergent Transcript 1 | RNA Gene | 17 | GC13P094712 | 10.72 |
| MIRLET7I | MicroRNA Let-7i | RNA Gene | 20 | GC12P062606 | 10.72 |
| RINT1 | RAD50 Interactor 1 | Protein Coding | 36 | GC07P105532 | 10.71 |
| SOX4 | SRY-Box Transcription Factor 4 | Protein Coding | 43 | GC06P021593 | 10.71 |
| PTHLH | Parathyroid Hormone Like Hormone | Protein Coding | 45 | GC12M027959 | 10.69 |
| KCNK12 | Potassium Two Pore Domain Channel Subfamily K Member 12 | Protein Coding | 39 | GC02M047516 | 10.67 |
| EWSR1 | EWS RNA Binding Protein 1 | Protein Coding | 43 | GC22P029269 | 10.67 |
| SH2D1A | SH2 Domain Containing 1A | Protein Coding | 47 | GC0XP124227 | 10.67 |
| WSPAR | WNT Signaling Pathway Activating Non-Coding RNA | RNA Gene | 11 | GC05P133914 | 10.66 |
| TYR | Tyrosinase | Protein Coding | 47 | GC11P089177 | 10.66 |
| RBM5-AS1 | RBM5 Antisense RNA 1 | RNA Gene | 11 | GC03M050099 | 10.65 |
| MIR590 | MicroRNA 590 | RNA Gene | 18 | GC07P074191 | 10.64 |
| PRODH | Proline Dehydrogenase 1 | Protein Coding | 45 | GC22M018912 | 10.63 |
| HOXB-AS3 | HOXB Cluster Antisense RNA 3 | RNA Gene | 18 | GC17P048549 | 10.62 |
| EPDR1 | Ependymin Related 1 | Protein Coding | 36 | GC07P037688 | 10.62 |
| AGBL4 | ATP/GTP Binding Protein Like 4 | Protein Coding | 33 | GC01M048532 | 10.62 |
| FGF7P5 | Fibroblast Growth Factor 7 Pseudogene 5 | Pseudogene | 6 | GC09P043288 | 10.61 |
| ACTG1 | Actin Gamma 1 | Protein Coding | 50 | GC17M081509 | 10.61 |
| ERCC4 | ERCC Excision Repair 4, Endonuclease Catalytic Subunit | Protein Coding | 45 | GC16P013920 | 10.57 |
| ATF1 | Activating Transcription Factor 1 | Protein Coding | 46 | GC12P050763 | 10.57 |
| MROCKI | MARCKS Cis Regulating LncRNA Promoter Of Cytokines And Inflammation | RNA Gene | 11 | GC06M113869 | 10.56 |
| ADGRV1 | Adhesion G Protein-Coupled Receptor V1 | Protein Coding | 35 | GC05P090529 | 10.56 |
| RAD23B | RAD23 Homolog B, Nucleotide Excision Repair Protein | Protein Coding | 44 | GC09P107283 | 10.54 |
| PSCA | Prostate Stem Cell Antigen | Protein Coding | 39 | GC08P142670 | 10.52 |
| MACROD2-AS1 | MACROD2 Antisense RNA 1 | RNA Gene | 16 | GC20M014866 | 10.51 |
| GABPB1-AS1 | GABPB1 Antisense RNA 1 | RNA Gene | 13 | GC15P050354 | 10.51 |
| HIPK1-AS1 | HIPK1 Antisense RNA 1 | RNA Gene | 13 | GC01M113924 | 10.51 |
| ZNF582-AS1 | ZNF582 Antisense RNA 1 (Head To Head) | RNA Gene | 13 | GC19P056394 | 10.51 |
| EHHADH-AS1 | EHHADH Antisense RNA 1 | RNA Gene | 12 | GC03P185162 | 10.51 |
| ENSG00000228082 |  | RNA Gene | 10 | GC06P100427 | 10.51 |
| LINC02446 | Long Intergenic Non-Protein Coding RNA 2446 | RNA Gene | 10 | GC12P010552 | 10.51 |
| LINC02086 | Long Intergenic Non-Protein Coding RNA 2086 | RNA Gene | 9 | GC17P048643 | 10.51 |
| ENSG00000260196 |  | RNA Gene | 9 | GC11P017388 | 10.51 |
| LINC02223 | Long Intergenic Non-Protein Coding RNA 2223 | RNA Gene | 9 | GC05P017819 | 10.51 |
| SEC63P1 | SEC63 Homolog, Protein Translocation Regulator Pseudogene 1 | Pseudogene | 8 | GC01P097545 | 10.51 |
| ENSG00000237588 |  | RNA Gene | 8 | GC01M156687 | 10.51 |
| ENSG00000257241 |  | RNA Gene | 8 | GC12M069946 | 10.51 |
| ENSG00000266680 |  | RNA Gene | 8 | GC06M063571 | 10.51 |
| LAMB3 | Laminin Subunit Beta 3 | Protein Coding | 45 | GC01M209614 | 10.51 |
| GTF2H5 | General Transcription Factor IIH Subunit 5 | Protein Coding | 40 | GC06P158168 | 10.51 |
| MIR152 | MicroRNA 152 | RNA Gene | 20 | GC17M048037 | 10.47 |
| EPOR | Erythropoietin Receptor | Protein Coding | 48 | GC19M011377 | 10.42 |
| VIP | Vasoactive Intestinal Peptide | Protein Coding | 44 | GC06P152750 | 10.37 |
| RUNX2 | RUNX Family Transcription Factor 2 | Protein Coding | 47 | GC06P047549 | 10.36 |
| MIRLET7A3 | MicroRNA Let-7a-3 | RNA Gene | 19 | GC22P046112 | 10.32 |
| MIR30B | MicroRNA 30b | RNA Gene | 20 | GC08M134800 | 10.31 |
| CEBPB | CCAAT Enhancer Binding Protein Beta | Protein Coding | 43 | GC20P050190 | 10.31 |
| NAB2 | NGFI-A Binding Protein 2 | Protein Coding | 40 | GC12P057088 | 10.31 |
| GRN | Granulin Precursor | Protein Coding | 47 | GC17P044345 | 10.3 |
| FOXE1 | Forkhead Box E1 | Protein Coding | 42 | GC09P097853 | 10.29 |
| AKR1C3 | Aldo-Keto Reductase Family 1 Member C3 | Protein Coding | 47 | GC10P005035 | 10.28 |
| LEPR | Leptin Receptor | Protein Coding | 49 | GC01P065421 | 10.27 |
| RHEB | Ras Homolog, MTORC1 Binding | Protein Coding | 48 | GC07M151466 | 10.26 |
| TTN | Titin | Protein Coding | 47 | GC02M178525 | 10.25 |
| IL23R | Interleukin 23 Receptor | Protein Coding | 44 | GC01P067138 | 10.23 |
| RRAS2 | RAS Related 2 | Protein Coding | 46 | GC11M014299 | 10.22 |
| MIR151A | MicroRNA 151a | RNA Gene | 17 | GC08M140733 | 10.21 |
| MACROD1 | Mono-ADP Ribosylhydrolase 1 | Protein Coding | 35 | GC11M063998 | 10.2 |
| MIR429 | MicroRNA 429 | RNA Gene | 19 | GC01P001464 | 10.19 |
| PSEN1 | Presenilin 1 | Protein Coding | 52 | GC14P073136 | 10.19 |
| PRCC | Proline Rich Mitotic Checkpoint Control Factor | Protein Coding | 37 | GC01P156750 | 10.14 |
| INSR | Insulin Receptor | Protein Coding | 54 | GC19M007112 | 10.13 |
| PML | PML Nuclear Body Scaffold | Protein Coding | 45 | GC15P073994 | 10.09 |
| FES | FES Proto-Oncogene, Tyrosine Kinase | Protein Coding | 48 | GC15P090883 | 10.05 |
| MECOM | MDS1 And EVI1 Complex Locus | Protein Coding | 47 | GC03M169083 | 10.02 |
| POU5F1 | POU Class 5 Homeobox 1 | Protein Coding | 47 | GC06M031184 | 9.99 |
| CLU | Clusterin | Protein Coding | 46 | GC08M027596 | 9.98 |
| TNFRSF8 | TNF Receptor Superfamily Member 8 | Protein Coding | 42 | GC01P012063 | 9.95 |
| ANPEP | Alanyl Aminopeptidase, Membrane | Protein Coding | 48 | GC15M089784 | 9.93 |
| HDAC4 | Histone Deacetylase 4 | Protein Coding | 51 | GC02M239048 | 9.9 |
| IKBKB | Inhibitor Of Nuclear Factor Kappa B Kinase Subunit Beta | Protein Coding | 52 | GC08P042271 | 9.9 |
| TMPRSS4 | Transmembrane Serine Protease 4 | Protein Coding | 40 | GC11P118077 | 9.9 |
| AXL | AXL Receptor Tyrosine Kinase | Protein Coding | 51 | GC19P041219 | 9.89 |
| DUSP6 | Dual Specificity Phosphatase 6 | Protein Coding | 48 | GC12M089347 | 9.88 |
| CTAG2 | Cancer/Testis Antigen 2 | Protein Coding | 33 | GC0XM154651 | 9.84 |
| MAP3K1 | Mitogen-Activated Protein Kinase Kinase Kinase 1 | Protein Coding | 49 | GC05P056815 | 9.83 |
| PER1 | Period Circadian Regulator 1 | Protein Coding | 41 | GC17M008853 | 9.82 |
| GPER1 | G Protein-Coupled Estrogen Receptor 1 | Protein Coding | 37 | GC07P001188 | 9.81 |
| TNFRSF1B | TNF Receptor Superfamily Member 1B | Protein Coding | 47 | GC01P012167 | 9.81 |
| POMC | Proopiomelanocortin | Protein Coding | 48 | GC02M025160 | 9.79 |
| PHOX2B | Paired Like Homeobox 2B | Protein Coding | 43 | GC04M041746 | 9.77 |
| SOD1 | Superoxide Dismutase 1 | Protein Coding | 51 | GC21P031659 | 9.74 |
| MC1R | Melanocortin 1 Receptor | Protein Coding | 47 | GC16P089912 | 9.74 |
| GATA2 | GATA Binding Protein 2 | Protein Coding | 47 | GC03M128479 | 9.74 |
| TGM1 | Transglutaminase 1 | Protein Coding | 45 | GC14M024249 | 9.7 |
| KRT17 | Keratin 17 | Protein Coding | 45 | GC17M041619 | 9.7 |
| NEUROG1 | Neurogenin 1 | Protein Coding | 40 | GC05M135581 | 9.7 |
| ADH1C | Alcohol Dehydrogenase 1C (Class I), Gamma Polypeptide | Protein Coding | 42 | GC04M099336 | 9.68 |
| ZFR | Zinc Finger RNA Binding Protein | Protein Coding | 37 | GC05M032390 | 9.65 |
| CBFB | Core-Binding Factor Subunit Beta | Protein Coding | 44 | GC16P067063 | 9.65 |
| COL18A1 | Collagen Type XVIII Alpha 1 Chain | Protein Coding | 45 | GC21P045405 | 9.64 |
| DMD | Dystrophin | Protein Coding | 46 | GC0XM031047 | 9.63 |
| TNFSF15 | TNF Superfamily Member 15 | Protein Coding | 45 | GC09M114784 | 9.63 |
| FGF1 | Fibroblast Growth Factor 1 | Protein Coding | 48 | GC05M142555 | 9.63 |
| HABP2 | Hyaluronan Binding Protein 2 | Protein Coding | 44 | GC10P113550 | 9.62 |
| MIR130A | MicroRNA 130a | RNA Gene | 20 | GC11P057641 | 9.61 |
| ARSH | Arylsulfatase Family Member H | Protein Coding | 34 | GC0XP003006 | 9.6 |
| DPP4 | Dipeptidyl Peptidase 4 | Protein Coding | 50 | GC02M161992 | 9.58 |
| KIF5B | Kinesin Family Member 5B | Protein Coding | 43 | GC10M032035 | 9.56 |
| SRD5A2 | Steroid 5 Alpha-Reductase 2 | Protein Coding | 43 | GC02M031522 | 9.56 |
| LHCGR | Luteinizing Hormone/Choriogonadotropin Receptor | Protein Coding | 47 | GC02M048647 | 9.56 |
| TUSC3 | Tumor Suppressor Candidate 3 | Protein Coding | 41 | GC08P015417 | 9.55 |
| IL1A | Interleukin 1 Alpha | Protein Coding | 44 | GC02M112773 | 9.55 |
| COL11A1 | Collagen Type XI Alpha 1 Chain | Protein Coding | 43 | GC01M102876 | 9.53 |
| RB1CC1 | RB1 Inducible Coiled-Coil 1 | Protein Coding | 42 | GC08M052622 | 9.52 |
| MSMB | Microseminoprotein Beta | Protein Coding | 40 | GC10M046033 | 9.51 |
| CIB1 | Calcium And Integrin Binding 1 | Protein Coding | 41 | GC15M090229 | 9.51 |
| TPMT | Thiopurine S-Methyltransferase | Protein Coding | 47 | GC06M018128 | 9.5 |
| CYP2A6 | Cytochrome P450 Family 2 Subfamily A Member 6 | Protein Coding | 47 | GC19M040843 | 9.48 |
| GATA4 | GATA Binding Protein 4 | Protein Coding | 48 | GC08P011676 | 9.47 |
| CLDN7 | Claudin 7 | Protein Coding | 41 | GC17M007259 | 9.47 |
| PAWR | Pro-Apoptotic WT1 Regulator | Protein Coding | 40 | GC12M079574 | 9.47 |
| KL | Klotho | Protein Coding | 44 | GC13P033016 | 9.46 |
| RUNX1 | RUNX Family Transcription Factor 1 | Protein Coding | 48 | GC21M034787 | 9.45 |
| MITF | Melanocyte Inducing Transcription Factor | Protein Coding | 47 | GC03P069788 | 9.42 |
| MIR499A | MicroRNA 499a | RNA Gene | 21 | GC20P034990 | 9.42 |
| CD36 | CD36 Molecule | Protein Coding | 48 | GC07P080369 | 9.42 |
| MXI1 | MAX Interactor 1, Dimerization Protein | Protein Coding | 41 | GC10P110208 | 9.4 |
| TOX3 | TOX High Mobility Group Box Family Member 3 | Protein Coding | 37 | GC16M052471 | 9.4 |
| SMAD6 | SMAD Family Member 6 | Protein Coding | 46 | GC15P066702 | 9.39 |
| ECT2 | Epithelial Cell Transforming 2 | Protein Coding | 40 | GC03P172750 | 9.39 |
| AOPEP | Aminopeptidase O (Putative) | Protein Coding | 29 | GC09P094728 | 9.39 |
| BCAR1 | BCAR1 Scaffold Protein, Cas Family Member | Protein Coding | 43 | GC16M075228 | 9.39 |
| MAGEA1 | MAGE Family Member A1 | Protein Coding | 37 | GC0XP153179 | 9.37 |
| NACC1 | Nucleus Accumbens Associated 1 | Protein Coding | 40 | GC19P013117 | 9.37 |
| CCR3 | C-C Motif Chemokine Receptor 3 | Protein Coding | 47 | GC03P046227 | 9.36 |
| CCDC26 | CCDC26 Long Non-Coding RNA | RNA Gene | 26 | GC08M128636 | 9.35 |
| EDN1 | Endothelin 1 | Protein Coding | 47 | GC06P012290 | 9.34 |
| SERPINA1 | Serpin Family A Member 1 | Protein Coding | 49 | GC14M094376 | 9.33 |
| MIR196A2 | MicroRNA 196a-2 | RNA Gene | 21 | GC12P054200 | 9.31 |
| REST | RE1 Silencing Transcription Factor | Protein Coding | 44 | GC04P056907 | 9.28 |
| HMMR | Hyaluronan Mediated Motility Receptor | Protein Coding | 42 | GC05P163480 | 9.27 |
| CHUK | Component Of Inhibitor Of Nuclear Factor Kappa B Kinase Complex | Protein Coding | 52 | GC10M100188 | 9.24 |
| AKR1C2 | Aldo-Keto Reductase Family 1 Member C2 | Protein Coding | 47 | GC10M004987 | 9.24 |
| DKC1 | Dyskerin Pseudouridine Synthase 1 | Protein Coding | 46 | GC0XP154762 | 9.23 |
| PAK1 | P21 (RAC1) Activated Kinase 1 | Protein Coding | 47 | GC11M077321 | 9.22 |
| MSLN | Mesothelin | Protein Coding | 40 | GC16P001407 | 9.21 |
| F5 | Coagulation Factor V | Protein Coding | 45 | GC01M169511 | 9.21 |
| IGH | Immunoglobulin Heavy Locus | Protein Coding | 15 | GC14M109514 | 9.21 |
| HLA-DQB1 | Major Histocompatibility Complex, Class II, DQ Beta 1 | Protein Coding | 44 | GC06M032804 | 9.2 |
| BSG | Basigin (Ok Blood Group) | Protein Coding | 44 | GC19P000571 | 9.18 |
| MAP3K5 | Mitogen-Activated Protein Kinase Kinase Kinase 5 | Protein Coding | 47 | GC06M136557 | 9.18 |
| DES | Desmin | Protein Coding | 48 | GC02P219418 | 9.18 |
| SIX1 | SIX Homeobox 1 | Protein Coding | 44 | GC14M060643 | 9.17 |
| ETV5 | ETS Variant Transcription Factor 5 | Protein Coding | 39 | GC03M186046 | 9.17 |
| JAK3 | Janus Kinase 3 | Protein Coding | 51 | GC19M017824 | 9.14 |
| BIRC2 | Baculoviral IAP Repeat Containing 2 | Protein Coding | 45 | GC11P102347 | 9.14 |
| FOXC1 | Forkhead Box C1 | Protein Coding | 41 | GC06P001610 | 9.13 |
| KMT2A | Lysine Methyltransferase 2A | Protein Coding | 44 | GC11P118436 | 9.12 |
| CTTN | Cortactin | Protein Coding | 43 | GC11P070398 | 9.11 |
| MTDH | Metadherin | Protein Coding | 40 | GC08P097643 | 9.1 |
| YBX1 | Y-Box Binding Protein 1 | Protein Coding | 39 | GC01P042682 | 9.09 |
| ZNRD1ASP | Zinc Ribbon Domain Containing 1 Antisense, Pseudogene | Pseudogene | 14 | GC06M030869 | 9.08 |
| HBEGF | Heparin Binding EGF Like Growth Factor | Protein Coding | 43 | GC05M140332 | 9.07 |
| MYLK | Myosin Light Chain Kinase | Protein Coding | 52 | GC03M123610 | 9.05 |
| LAMC1 | Laminin Subunit Gamma 1 | Protein Coding | 43 | GC01P182992 | 9.04 |
| DDX3X | DEAD-Box Helicase 3 X-Linked | Protein Coding | 47 | GC0XP041333 | 9.04 |
| MIR30C1 | MicroRNA 30c-1 | RNA Gene | 21 | GC01P040757 | 9.04 |
| DVL3 | Dishevelled Segment Polarity Protein 3 | Protein Coding | 45 | GC03P184155 | 9.04 |
| ADH1B | Alcohol Dehydrogenase 1B (Class I), Beta Polypeptide | Protein Coding | 43 | GC04M099304 | 9.04 |
| FGF7 | Fibroblast Growth Factor 7 | Protein Coding | 41 | GC15P049423 | 9.03 |
| SLX4 | SLX4 Structure-Specific Endonuclease Subunit | Protein Coding | 39 | GC16M003581 | 9.03 |
| IRF5 | Interferon Regulatory Factor 5 | Protein Coding | 48 | GC07P128937 | 9.03 |
| GALR1 | Galanin Receptor 1 | Protein Coding | 44 | GC18P077250 | 9.02 |
| KDM1A | Lysine Demethylase 1A | Protein Coding | 47 | GC01P023019 | 9.02 |
| GNRHR | Gonadotropin Releasing Hormone Receptor | Protein Coding | 47 | GC04M067737 | 9.02 |
| PLCG1 | Phospholipase C Gamma 1 | Protein Coding | 47 | GC20P041136 | 9 |
| PLCB1 | Phospholipase C Beta 1 | Protein Coding | 48 | GC20P008061 | 9 |
| IL3 | Interleukin 3 | Protein Coding | 44 | GC05P132060 | 8.99 |
| NFKB2 | Nuclear Factor Kappa B Subunit 2 | Protein Coding | 52 | GC10P102394 | 8.97 |
| NUDC | Nuclear Distribution C, Dynein Complex Regulator | Protein Coding | 41 | GC01P026932 | 8.96 |
| CCL5 | C-C Motif Chemokine Ligand 5 | Protein Coding | 43 | GC17M035871 | 8.96 |
| MIR425 | MicroRNA 425 | RNA Gene | 17 | GC03M049251 | 8.96 |
| SHKBP1 | SH3KBP1 Binding Protein 1 | Protein Coding | 36 | GC19P040576 | 8.95 |
| APAF1 | Apoptotic Peptidase Activating Factor 1 | Protein Coding | 47 | GC12P098645 | 8.94 |
| PUF60 | Poly(U) Binding Splicing Factor 60 | Protein Coding | 41 | GC08M143816 | 8.93 |
| ACCS | 1-Aminocyclopropane-1-Carboxylate Synthase Homolog (Inactive) | Protein Coding | 38 | GC11P044045 | 8.93 |
| PKHD1 | PKHD1 Ciliary IPT Domain Containing Fibrocystin/Polyductin | Protein Coding | 39 | GC06M051588 | 8.91 |
| MPL | MPL Proto-Oncogene, Thrombopoietin Receptor | Protein Coding | 48 | GC01P043337 | 8.91 |
| MYD88 | MYD88 Innate Immune Signal Transduction Adaptor | Protein Coding | 50 | GC03P038179 | 8.9 |
| KLK10 | Kallikrein Related Peptidase 10 | Protein Coding | 40 | GC19M051012 | 8.89 |
| THPO | Thrombopoietin | Protein Coding | 42 | GC03M184371 | 8.89 |
| MYH9 | Myosin Heavy Chain 9 | Protein Coding | 49 | GC22M036281 | 8.88 |
| STMN1 | Stathmin 1 | Protein Coding | 44 | GC01M025884 | 8.87 |
| ADA | Adenosine Deaminase | Protein Coding | 51 | GC20M044620 | 8.85 |
| RPS20 | Ribosomal Protein S20 | Protein Coding | 43 | GC08M056067 | 8.84 |
| CCL13 | C-C Motif Chemokine Ligand 13 | Protein Coding | 38 | GC17P034356 | 8.84 |
| LIMK1 | LIM Domain Kinase 1 | Protein Coding | 49 | GC07P074082 | 8.84 |
| PTPRC | Protein Tyrosine Phosphatase Receptor Type C | Protein Coding | 51 | GC01P198607 | 8.84 |
| SULF2 | Sulfatase 2 | Protein Coding | 40 | GC20M047656 | 8.83 |
| YY1 | YY1 Transcription Factor | Protein Coding | 48 | GC14P100238 | 8.83 |
| ANXA10 | Annexin A10 | Protein Coding | 37 | GC04P168081 | 8.83 |
| PTPN1 | Protein Tyrosine Phosphatase Non-Receptor Type 1 | Protein Coding | 51 | GC20P050510 | 8.81 |
| FOXD2-AS1 | FOXD2 Adjacent Opposite Strand RNA 1 | RNA Gene | 16 | GC01M047432 | 8.8 |
| EDNRB | Endothelin Receptor Type B | Protein Coding | 49 | GC13M077895 | 8.8 |
| MIR128-1 | MicroRNA 128-1 | RNA Gene | 19 | GC02P135665 | 8.77 |
| FABP6 | Fatty Acid Binding Protein 6 | Protein Coding | 42 | GC05P160187 | 8.77 |
| TRIP13 | Thyroid Hormone Receptor Interactor 13 | Protein Coding | 40 | GC05P000892 | 8.77 |
| CD28 | CD28 Molecule | Protein Coding | 47 | GC02P203706 | 8.77 |
| RAD51B | RAD51 Paralog B | Protein Coding | 37 | GC14P067819 | 8.76 |
| ROCK1 | Rho Associated Coiled-Coil Containing Protein Kinase 1 | Protein Coding | 50 | GC18M020946 | 8.76 |
| SETBP1 | SET Binding Protein 1 | Protein Coding | 40 | GC18P044680 | 8.76 |
| SLC2A4 | Solute Carrier Family 2 Member 4 | Protein Coding | 45 | GC17P007295 | 8.75 |
| MAGEA3 | MAGE Family Member A3 | Protein Coding | 36 | GC0XP152698 | 8.75 |
| SNCG | Synuclein Gamma | Protein Coding | 42 | GC10P086957 | 8.74 |
| CLPTM1L | CLPTM1 Like | Protein Coding | 36 | GC05M001317 | 8.73 |
| CCL14 | C-C Motif Chemokine Ligand 14 | Protein Coding | 36 | GC17M036610 | 8.73 |
| MIR98 | MicroRNA 98 | RNA Gene | 17 | GC0XM053582 | 8.73 |
| TCHP | Trichoplein Keratin Filament Binding | Protein Coding | 34 | GC12P109900 | 8.72 |
| MMP13 | Matrix Metallopeptidase 13 | Protein Coding | 50 | GC11M102942 | 8.72 |
| MIR148B | MicroRNA 148b | RNA Gene | 20 | GC12P054337 | 8.71 |
| SPARC | Secreted Protein Acidic And Cysteine Rich | Protein Coding | 50 | GC05M151639 | 8.69 |
| NANOG | Nanog Homeobox | Protein Coding | 39 | GC12P007787 | 8.68 |
| KRT5 | Keratin 5 | Protein Coding | 47 | GC12M052514 | 8.68 |
| NDC80 | NDC80 Kinetochore Complex Component | Protein Coding | 41 | GC18P002571 | 8.67 |
| NCOR1 | Nuclear Receptor Corepressor 1 | Protein Coding | 43 | GC17M016029 | 8.66 |
| DPH1 | Diphthamide Biosynthesis 1 | Protein Coding | 40 | GC17P002030 | 8.66 |
| COL3A1 | Collagen Type III Alpha 1 Chain | Protein Coding | 47 | GC02P188974 | 8.65 |
| CDK8 | Cyclin Dependent Kinase 8 | Protein Coding | 47 | GC13P026254 | 8.63 |
| NUP214 | Nucleoporin 214 | Protein Coding | 43 | GC09P131125 | 8.6 |
| MIR125B1 | MicroRNA 125b-1 | RNA Gene | 21 | GC11M122100 | 8.59 |
| BLCAP | BLCAP Apoptosis Inducing Factor | Protein Coding | 32 | GC20M037492 | 8.59 |
| FOXA1 | Forkhead Box A1 | Protein Coding | 43 | GC14M037589 | 8.58 |
| POSTN | Periostin | Protein Coding | 43 | GC13M037562 | 8.57 |
| HMGA1 | High Mobility Group AT-Hook 1 | Protein Coding | 46 | GC06P047417 | 8.56 |
| CCNG1 | Cyclin G1 | Protein Coding | 42 | GC05P163438 | 8.56 |
| IKBKG | Inhibitor Of Nuclear Factor Kappa B Kinase Regulatory Subunit Gamma | Protein Coding | 48 | GC0XP154541 | 8.55 |
| PAX5 | Paired Box 5 | Protein Coding | 46 | GC09M036828 | 8.55 |
| RTEL1 | Regulator Of Telomere Elongation Helicase 1 | Protein Coding | 40 | GC20P063658 | 8.54 |
| EHBP1 | EH Domain Binding Protein 1 | Protein Coding | 38 | GC02P062673 | 8.54 |
| ACTC1 | Actin Alpha Cardiac Muscle 1 | Protein Coding | 42 | GC15M034788 | 8.54 |
| OBSCN | Obscurin, Cytoskeletal Calmodulin And Titin-Interacting RhoGEF | Protein Coding | 40 | GC01P228208 | 8.54 |
| PRKAA1 | Protein Kinase AMP-Activated Catalytic Subunit Alpha 1 | Protein Coding | 47 | GC05M040759 | 8.51 |
| TMPRSS2 | Transmembrane Serine Protease 2 | Protein Coding | 44 | GC21M041464 | 8.5 |
| PIM2 | Pim-2 Proto-Oncogene, Serine/Threonine Kinase | Protein Coding | 44 | GC0XM048913 | 8.47 |
| PHC1 | Polyhomeotic Homolog 1 | Protein Coding | 40 | GC12P008913 | 8.46 |
| MSH5 | MutS Homolog 5 | Protein Coding | 41 | GC06P047322 | 8.46 |
| CYP3A5 | Cytochrome P450 Family 3 Subfamily A Member 5 | Protein Coding | 47 | GC07M099648 | 8.43 |
| MXRA5 | Matrix Remodeling Associated 5 | Protein Coding | 32 | GC0XM003308 | 8.43 |
| STAT5A | Signal Transducer And Activator Of Transcription 5A | Protein Coding | 45 | GC17P042287 | 8.43 |
| DNAJC2 | DnaJ Heat Shock Protein Family (Hsp40) Member C2 | Protein Coding | 37 | GC07M103312 | 8.43 |
| SMO | Smoothened, Frizzled Class Receptor | Protein Coding | 48 | GC07P129463 | 8.43 |
| IL2RA | Interleukin 2 Receptor Subunit Alpha | Protein Coding | 50 | GC10M006010 | 8.42 |
| LZTS1 | Leucine Zipper Tumor Suppressor 1 | Protein Coding | 38 | GC08M020246 | 8.42 |
| MIR376A1 | MicroRNA 376a-1 | RNA Gene | 15 | GC14P104790 | 8.4 |
| AURKB | Aurora Kinase B | Protein Coding | 48 | GC17M008864 | 8.39 |
| MACF1 | Microtubule Actin Crosslinking Factor 1 | Protein Coding | 41 | GC01P039082 | 8.39 |
| SSX2 | SSX Family Member 2 | Protein Coding | 37 | GC0XM052696 | 8.39 |
| BCR | BCR Activator Of RhoGEF And GTPase | Protein Coding | 51 | GC22P023179 | 8.38 |
| BCAR3 | BCAR3 Adaptor Protein, NSP Family Member | Protein Coding | 39 | GC01M093561 | 8.38 |
| ANXA6 | Annexin A6 | Protein Coding | 43 | GC05M151077 | 8.38 |
| CHRNA5 | Cholinergic Receptor Nicotinic Alpha 5 Subunit | Protein Coding | 44 | GC15P078565 | 8.38 |
| TRPS1 | Transcriptional Repressor GATA Binding 1 | Protein Coding | 45 | GC08M115408 | 8.37 |
| ROR1 | Receptor Tyrosine Kinase Like Orphan Receptor 1 | Protein Coding | 47 | GC01P063774 | 8.36 |
| ETV1 | ETS Variant Transcription Factor 1 | Protein Coding | 46 | GC07M013891 | 8.35 |
| FZD5 | Frizzled Class Receptor 5 | Protein Coding | 47 | GC02M207762 | 8.34 |
| MIR605 | MicroRNA 605 | RNA Gene | 16 | GC10P051299 | 8.33 |
| PTH | Parathyroid Hormone | Protein Coding | 47 | GC11M013492 | 8.33 |
| EPHA7 | EPH Receptor A7 | Protein Coding | 48 | GC06M093240 | 8.32 |
| MUC13 | Mucin 13, Cell Surface Associated | Protein Coding | 36 | GC03M124905 | 8.31 |
| NTF3 | Neurotrophin 3 | Protein Coding | 43 | GC12P005432 | 8.31 |
| HAND1 | Heart And Neural Crest Derivatives Expressed 1 | Protein Coding | 41 | GC05M154450 | 8.3 |
| COL1A1 | Collagen Type I Alpha 1 Chain | Protein Coding | 50 | GC17M050183 | 8.28 |
| MPG | N-Methylpurine DNA Glycosylase | Protein Coding | 41 | GC16P001366 | 8.27 |
| CEBPA | CCAAT Enhancer Binding Protein Alpha | Protein Coding | 47 | GC19M033299 | 8.27 |
| PARL | Presenilin Associated Rhomboid Like | Protein Coding | 41 | GC03M183825 | 8.25 |
| CCN2 | Cellular Communication Network Factor 2 | Protein Coding | 39 | GC06M131948 | 8.25 |
| RICTOR | RPTOR Independent Companion Of MTOR Complex 2 | Protein Coding | 44 | GC05M038939 | 8.24 |
| CAGE1 | Cancer Antigen 1 | Protein Coding | 35 | GC06M007326 | 8.24 |
| CXCR5 | C-X-C Motif Chemokine Receptor 5 | Protein Coding | 41 | GC11P118898 | 8.23 |
| ACP3 | Acid Phosphatase 3 | Protein Coding | 35 | GC03P132319 | 8.22 |
| TAF1B | TATA-Box Binding Protein Associated Factor, RNA Polymerase I Subunit B | Protein Coding | 36 | GC02P009834 | 8.22 |
| SELENBP1 | Selenium Binding Protein 1 | Protein Coding | 43 | GC01M151364 | 8.21 |
| USF2 | Upstream Transcription Factor 2, C-Fos Interacting | Protein Coding | 39 | GC19P035268 | 8.21 |
| EHMT1 | Euchromatic Histone Lysine Methyltransferase 1 | Protein Coding | 45 | GC09P137618 | 8.2 |
| BRINP1 | BMP/Retinoic Acid Inducible Neural Specific 1 | Protein Coding | 32 | GC09M119153 | 8.19 |
| PRL | Prolactin | Protein Coding | 44 | GC06M022230 | 8.19 |
| ELN | Elastin | Protein Coding | 44 | GC07P074027 | 8.18 |
| MIR181C | MicroRNA 181c | RNA Gene | 20 | GC19P013876 | 8.18 |
| GLA | Galactosidase Alpha | Protein Coding | 48 | GC0XM101393 | 8.17 |
| TSG101 | Tumor Susceptibility 101 | Protein Coding | 43 | GC11M018468 | 8.16 |
| CA1 | Carbonic Anhydrase 1 | Protein Coding | 47 | GC08M085327 | 8.13 |
| PHF12 | PHD Finger Protein 12 | Protein Coding | 36 | GC17M028905 | 8.13 |
| EPAS1 | Endothelial PAS Domain Protein 1 | Protein Coding | 48 | GC02P046293 | 8.12 |
| MIR582 | MicroRNA 582 | RNA Gene | 17 | GC05M059703 | 8.12 |
| CPZ | Carboxypeptidase Z | Protein Coding | 39 | GC04P008583 | 8.12 |
| IL1R1 | Interleukin 1 Receptor Type 1 | Protein Coding | 45 | GC02P102136 | 8.1 |
| PRKCB | Protein Kinase C Beta | Protein Coding | 47 | GC16P023892 | 8.1 |
| KISS1 | KiSS-1 Metastasis Suppressor | Protein Coding | 41 | GC01M204190 | 8.1 |
| CAB39L | Calcium Binding Protein 39 Like | Protein Coding | 36 | GC13M049308 | 8.1 |
| MIR198 | MicroRNA 198 | RNA Gene | 16 | GC03M120395 | 8.08 |
| ZNF304 | Zinc Finger Protein 304 | Protein Coding | 32 | GC19P057351 | 8.08 |
| EPO | Erythropoietin | Protein Coding | 41 | GC07P100720 | 8.06 |
| GDPD2 | Glycerophosphodiester Phosphodiesterase Domain Containing 2 | Protein Coding | 36 | GC0XP070423 | 8.06 |
| MAPRE2 | Microtubule Associated Protein RP/EB Family Member 2 | Protein Coding | 41 | GC18P034976 | 8.05 |
| RPS19 | Ribosomal Protein S19 | Protein Coding | 48 | GC19P041859 | 8.04 |
| HSD17B1 | Hydroxysteroid 17-Beta Dehydrogenase 1 | Protein Coding | 43 | GC17P042548 | 8.04 |
| CRYBG2 | Crystallin Beta-Gamma Domain Containing 2 | Protein Coding | 23 | GC01M026321 | 8.03 |
| ZNF470 | Zinc Finger Protein 470 | Protein Coding | 33 | GC19P056568 | 8.02 |
| TCIM | Transcriptional And Immune Response Regulator | Protein Coding | 25 | GC08P040153 | 8.01 |
| NOG | Noggin | Protein Coding | 47 | GC17P056593 | 8 |
| NUDT1 | Nudix Hydrolase 1 | Protein Coding | 43 | GC07P002242 | 8 |
| ZNRF3 | Zinc And Ring Finger 3 | Protein Coding | 35 | GC22P028803 | 7.99 |
| RRAS | RAS Related | Protein Coding | 43 | GC19M049635 | 7.99 |
| CALCA | Calcitonin Related Polypeptide Alpha | Protein Coding | 43 | GC11M014945 | 7.97 |
| OPCML | Opioid Binding Protein/Cell Adhesion Molecule Like | Protein Coding | 41 | GC11M132414 | 7.97 |
| L1CAM | L1 Cell Adhesion Molecule | Protein Coding | 46 | GC0XM153864 | 7.97 |
| GDNF | Glial Cell Derived Neurotrophic Factor | Protein Coding | 47 | GC05M037812 | 7.96 |
| CUL1 | Cullin 1 | Protein Coding | 44 | GC07P148697 | 7.96 |
| LRRFIP2 | LRR Binding FLII Interacting Protein 2 | Protein Coding | 38 | GC03M037052 | 7.96 |
| MUC15 | Mucin 15, Cell Surface Associated | Protein Coding | 35 | GC11M026537 | 7.96 |
| RPS6KA3 | Ribosomal Protein S6 Kinase A3 | Protein Coding | 52 | GC0XM020149 | 7.94 |
| LTA | Lymphotoxin Alpha | Protein Coding | 42 | GC06P047303 | 7.94 |
| MUC3B | Mucin 3B, Cell Surface Associated | Protein Coding | 17 | GC07U903146 | 7.93 |
| INHBA | Inhibin Subunit Beta A | Protein Coding | 45 | GC07M041668 | 7.93 |
| LMNA | Lamin A/C | Protein Coding | 47 | GC01P156082 | 7.92 |
| NXN | Nucleoredoxin | Protein Coding | 41 | GC17M000799 | 7.92 |
| MAGEA4 | MAGE Family Member A4 | Protein Coding | 39 | GC0XP151912 | 7.92 |
| NR1H2 | Nuclear Receptor Subfamily 1 Group H Member 2 | Protein Coding | 48 | GC19P050329 | 7.91 |
| HPSE | Heparanase | Protein Coding | 44 | GC04M083292 | 7.9 |
| KDM6A | Lysine Demethylase 6A | Protein Coding | 46 | GC0XP044873 | 7.9 |
| PTK2B | Protein Tyrosine Kinase 2 Beta | Protein Coding | 49 | GC08P027311 | 7.87 |
| MSH4 | MutS Homolog 4 | Protein Coding | 37 | GC01P075796 | 7.86 |
| SEMA3A | Semaphorin 3A | Protein Coding | 45 | GC07M083955 | 7.86 |
| CETN2 | Centrin 2 | Protein Coding | 42 | GC0XM152827 | 7.86 |
| FBN1 | Fibrillin 1 | Protein Coding | 45 | GC15M048408 | 7.85 |
| MIR30D | MicroRNA 30d | RNA Gene | 17 | GC08M134804 | 7.84 |
| ZAP70 | Zeta Chain Of T Cell Receptor Associated Protein Kinase 70 | Protein Coding | 51 | GC02P097696 | 7.83 |
| ELANE | Elastase, Neutrophil Expressed | Protein Coding | 46 | GC19P000854 | 7.82 |
| CCNE2 | Cyclin E2 | Protein Coding | 41 | GC08M094879 | 7.82 |
| XBP1 | X-Box Binding Protein 1 | Protein Coding | 45 | GC22M028794 | 7.81 |
| LIG1 | DNA Ligase 1 | Protein Coding | 46 | GC19M048115 | 7.81 |
| ASTE1 | Asteroid Homolog 1 | Protein Coding | 32 | GC03M131015 | 7.81 |
| MIR197 | MicroRNA 197 | RNA Gene | 19 | GC01P109549 | 7.79 |
| PRMT7 | Protein Arginine Methyltransferase 7 | Protein Coding | 44 | GC16P068339 | 7.78 |
| FAP | Fibroblast Activation Protein Alpha | Protein Coding | 42 | GC02M162170 | 7.75 |
| GADD45G | Growth Arrest And DNA Damage Inducible Gamma | Protein Coding | 40 | GC09P089605 | 7.75 |
| CDC25A | Cell Division Cycle 25A | Protein Coding | 47 | GC03M048173 | 7.75 |
| MIR101-1 | MicroRNA 101-1 | RNA Gene | 18 | GC01M065058 | 7.73 |
| GNB1 | G Protein Subunit Beta 1 | Protein Coding | 45 | GC01M001785 | 7.73 |
| TIA1 | TIA1 Cytotoxic Granule Associated RNA Binding Protein | Protein Coding | 43 | GC02M070209 | 7.72 |
| RAD21 | RAD21 Cohesin Complex Component | Protein Coding | 45 | GC08M116846 | 7.72 |
| IL24 | Interleukin 24 | Protein Coding | 42 | GC01P206897 | 7.71 |
| LUC7L2 | LUC7 Like 2, Pre-MRNA Splicing Factor | Protein Coding | 36 | GC07P139344 | 7.71 |
| ITGA3 | Integrin Subunit Alpha 3 | Protein Coding | 46 | GC17P050055 | 7.7 |
| SULT1E1 | Sulfotransferase Family 1E Member 1 | Protein Coding | 44 | GC04M069841 | 7.69 |
| F3 | Coagulation Factor III, Tissue Factor | Protein Coding | 45 | GC01M094530 | 7.69 |
| DMPK | DM1 Protein Kinase | Protein Coding | 48 | GC19M045769 | 7.68 |
| MIR26B | MicroRNA 26b | RNA Gene | 21 | GC02P218402 | 7.67 |
| CD5 | CD5 Molecule | Protein Coding | 41 | GC11P061114 | 7.67 |
| MIR33A | MicroRNA 33a | RNA Gene | 18 | GC22P041900 | 7.67 |
| FCGBP | Fc Fragment Of IgG Binding Protein | Protein Coding | 35 | GC19M039863 | 7.67 |
| YWHAE | Tyrosine 3-Monooxygenase/Tryptophan 5-Monooxygenase Activation Protein Epsilon | Protein Coding | 50 | GC17M001346 | 7.67 |
| FKBP5 | FKBP Prolyl Isomerase 5 | Protein Coding | 45 | GC06M042217 | 7.66 |
| RAP1A | RAP1A, Member Of RAS Oncogene Family | Protein Coding | 47 | GC01P111542 | 7.65 |
| TPO | Thyroid Peroxidase | Protein Coding | 48 | GC02P001374 | 7.65 |
| ANGPT1 | Angiopoietin 1 | Protein Coding | 45 | GC08M107246 | 7.65 |
| TPM1 | Tropomyosin 1 | Protein Coding | 48 | GC15P073930 | 7.65 |
| EPHA4 | EPH Receptor A4 | Protein Coding | 50 | GC02M221418 | 7.64 |
| TPM3 | Tropomyosin 3 | Protein Coding | 47 | GC01M154127 | 7.63 |
| EPM2AIP1 | EPM2A Interacting Protein 1 | Protein Coding | 35 | GC03M036986 | 7.63 |
| HERC2 | HECT And RLD Domain Containing E3 Ubiquitin Protein Ligase 2 | Protein Coding | 45 | GC15M028111 | 7.63 |
| ALYREF | Aly/REF Export Factor | Protein Coding | 37 | GC17M081887 | 7.62 |
| PSEN2 | Presenilin 2 | Protein Coding | 49 | GC01P226870 | 7.62 |
| EYA4 | EYA Transcriptional Coactivator And Phosphatase 4 | Protein Coding | 43 | GC06P133240 | 7.61 |
| PSMB8 | Proteasome 20S Subunit Beta 8 | Protein Coding | 49 | GC06M032840 | 7.6 |
| GPX1 | Glutathione Peroxidase 1 | Protein Coding | 48 | GC03M049368 | 7.6 |
| RXRA | Retinoid X Receptor Alpha | Protein Coding | 49 | GC09P134317 | 7.6 |
| TFG | Trafficking From ER To Golgi Regulator | Protein Coding | 44 | GC03P100709 | 7.59 |
| ACER3 | Alkaline Ceramidase 3 | Protein Coding | 38 | GC11P076860 | 7.59 |
| TRAT1 | T Cell Receptor Associated Transmembrane Adaptor 1 | Protein Coding | 37 | GC03P108823 | 7.59 |
| BRMS1 | BRMS1 Transcriptional Repressor And Anoikis Regulator | Protein Coding | 37 | GC11M066346 | 7.59 |
| GSN | Gelsolin | Protein Coding | 48 | GC09P121201 | 7.59 |
| MIR9-3 | MicroRNA 9-3 | RNA Gene | 19 | GC15P089363 | 7.57 |
| GHR | Growth Hormone Receptor | Protein Coding | 47 | GC05P042429 | 7.57 |
| UBE3A | Ubiquitin Protein Ligase E3A | Protein Coding | 47 | GC15M025333 | 7.56 |
| MST1R | Macrophage Stimulating 1 Receptor | Protein Coding | 48 | GC03M049958 | 7.56 |
| ECM1 | Extracellular Matrix Protein 1 | Protein Coding | 43 | GC01P150508 | 7.55 |
| SLC6A3 | Solute Carrier Family 6 Member 3 | Protein Coding | 49 | GC05M001392 | 7.54 |
| MUC21 | Mucin 21, Cell Surface Associated | Protein Coding | 32 | GC06P047291 | 7.53 |
| GGTLC3 | Gamma-Glutamyltransferase Light Chain Family Member 3 | Protein Coding | 20 | GC22M018516 | 7.52 |
| LCN2 | Lipocalin 2 | Protein Coding | 43 | GC09P128149 | 7.52 |
| NT5E | 5'-Nucleotidase Ecto | Protein Coding | 51 | GC06P085449 | 7.52 |
| ENO1 | Enolase 1 | Protein Coding | 47 | GC01M008861 | 7.52 |
| CFTR | CF Transmembrane Conductance Regulator | Protein Coding | 51 | GC07P117287 | 7.51 |
| SCGB1A1 | Secretoglobin Family 1A Member 1 | Protein Coding | 40 | GC11P062405 | 7.5 |
| PEBP1 | Phosphatidylethanolamine Binding Protein 1 | Protein Coding | 44 | GC12P118135 | 7.49 |
| ABHD16A | Abhydrolase Domain Containing 16A, Phospholipase | Protein Coding | 34 | GC06M032614 | 7.47 |
| MTUS1 | Microtubule Associated Scaffold Protein 1 | Protein Coding | 36 | GC08M017643 | 7.46 |
| PTPRD | Protein Tyrosine Phosphatase Receptor Type D | Protein Coding | 44 | GC09M008307 | 7.46 |
| IGF2BP3 | Insulin Like Growth Factor 2 MRNA Binding Protein 3 | Protein Coding | 41 | GC07M023316 | 7.45 |
| MIR337 | MicroRNA 337 | RNA Gene | 18 | GC14P104787 | 7.45 |
| DAB2IP | DAB2 Interacting Protein | Protein Coding | 39 | GC09P121566 | 7.45 |
| ACTR3 | Actin Related Protein 3 | Protein Coding | 42 | GC02P113889 | 7.45 |
| SOCS3 | Suppressor Of Cytokine Signaling 3 | Protein Coding | 44 | GC17M078356 | 7.44 |
| PRSS58 | Serine Protease 58 | Protein Coding | 32 | GC07M142263 | 7.44 |
| RMRP | RNA Component Of Mitochondrial RNA Processing Endoribonuclease | RNA Gene | 25 | GC09M035655 | 7.44 |
| SPINT2 | Serine Peptidase Inhibitor, Kunitz Type 2 | Protein Coding | 43 | GC19P038244 | 7.44 |
| NEDD4 | NEDD4 E3 Ubiquitin Protein Ligase | Protein Coding | 45 | GC15M055826 | 7.43 |
| CENPE | Centromere Protein E | Protein Coding | 44 | GC04M103105 | 7.43 |
| CDCA8 | Cell Division Cycle Associated 8 | Protein Coding | 41 | GC01P037692 | 7.42 |
| CEP76 | Centrosomal Protein 76 | Protein Coding | 35 | GC18M017322 | 7.42 |
| SERPINC1 | Serpin Family C Member 1 | Protein Coding | 48 | GC01M174153 | 7.41 |
| ADCY8 | Adenylate Cyclase 8 | Protein Coding | 44 | GC08M130780 | 7.4 |
| CCL3 | C-C Motif Chemokine Ligand 3 | Protein Coding | 39 | GC17M036088 | 7.4 |
| S100A8 | S100 Calcium Binding Protein A8 | Protein Coding | 42 | GC01M153391 | 7.4 |
| GADD45B | Growth Arrest And DNA Damage Inducible Beta | Protein Coding | 39 | GC19P002476 | 7.4 |
| PER2 | Period Circadian Regulator 2 | Protein Coding | 43 | GC02M238244 | 7.39 |
| FGA | Fibrinogen Alpha Chain | Protein Coding | 47 | GC04M154583 | 7.39 |
| ADAR | Adenosine Deaminase RNA Specific | Protein Coding | 44 | GC01M154582 | 7.39 |
| BCAS2 | BCAS2 Pre-MRNA Processing Factor | Protein Coding | 38 | GC01M114567 | 7.38 |
| MYOD1 | Myogenic Differentiation 1 | Protein Coding | 46 | GC11P017741 | 7.38 |
| GGT2 | Gamma-Glutamyltransferase 2 | Protein Coding | 31 | GC22M021207 | 7.37 |
| CEMIP | Cell Migration Inducing Hyaluronidase 1 | Protein Coding | 33 | GC15P080779 | 7.37 |
| HIC1 | HIC ZBTB Transcriptional Repressor 1 | Protein Coding | 40 | GC17P002054 | 7.36 |
| STK4 | Serine/Threonine Kinase 4 | Protein Coding | 48 | GC20P044966 | 7.36 |
| ABCA3 | ATP Binding Cassette Subfamily A Member 3 | Protein Coding | 48 | GC16M002275 | 7.36 |
| SH2B3 | SH2B Adaptor Protein 3 | Protein Coding | 46 | GC12P111405 | 7.36 |
| NOTCH4 | Notch Receptor 4 | Protein Coding | 45 | GC06M032648 | 7.35 |
| AKR1C1 | Aldo-Keto Reductase Family 1 Member C1 | Protein Coding | 43 | GC10P004963 | 7.33 |
| MIF | Macrophage Migration Inhibitory Factor | Protein Coding | 49 | GC22P023894 | 7.32 |
| TNC | Tenascin C | Protein Coding | 48 | GC09M115019 | 7.32 |
| TNS1 | Tensin 1 | Protein Coding | 39 | GC02M217799 | 7.31 |
| PTPN3 | Protein Tyrosine Phosphatase Non-Receptor Type 3 | Protein Coding | 44 | GC09M109375 | 7.31 |
| ROBO1 | Roundabout Guidance Receptor 1 | Protein Coding | 44 | GC03M078597 | 7.3 |
| KLRK1 | Killer Cell Lectin Like Receptor K1 | Protein Coding | 40 | GC12M013865 | 7.3 |
| POLH | DNA Polymerase Eta | Protein Coding | 48 | GC06P043576 | 7.29 |
| MVP | Major Vault Protein | Protein Coding | 39 | GC16P030094 | 7.29 |
| PHF7 | PHD Finger Protein 7 | Protein Coding | 35 | GC03P052411 | 7.29 |
| BIRC7 | Baculoviral IAP Repeat Containing 7 | Protein Coding | 40 | GC20P063235 | 7.28 |
| ACTA2 | Actin Alpha 2, Smooth Muscle | Protein Coding | 48 | GC10M088935 | 7.28 |
| MIR377 | MicroRNA 377 | RNA Gene | 17 | GC14P104794 | 7.26 |
| GHRL | Ghrelin And Obestatin Prepropeptide | Protein Coding | 43 | GC03M010285 | 7.25 |
| FZD2 | Frizzled Class Receptor 2 | Protein Coding | 48 | GC17P044557 | 7.25 |
| FGF4 | Fibroblast Growth Factor 4 | Protein Coding | 44 | GC11M069762 | 7.23 |
| MDK | Midkine | Protein Coding | 43 | GC11P046402 | 7.23 |
| BRD4 | Bromodomain Containing 4 | Protein Coding | 44 | GC19M015236 | 7.22 |
| PIM1 | Pim-1 Proto-Oncogene, Serine/Threonine Kinase | Protein Coding | 50 | GC06P047469 | 7.22 |
| ID1 | Inhibitor Of DNA Binding 1, HLH Protein | Protein Coding | 43 | GC20P031605 | 7.21 |
| KRT13 | Keratin 13 | Protein Coding | 43 | GC17M041500 | 7.21 |
| EML4 | EMAP Like 4 | Protein Coding | 38 | GC02P042169 | 7.21 |
| IL18 | Interleukin 18 | Protein Coding | 44 | GC11M112143 | 7.21 |
| APPL1 | Adaptor Protein, Phosphotyrosine Interacting With PH Domain And Leucine Zipper 1 | Protein Coding | 45 | GC03P057227 | 7.2 |
| IL4R | Interleukin 4 Receptor | Protein Coding | 47 | GC16P027325 | 7.2 |
| RASAL2 | RAS Protein Activator Like 2 | Protein Coding | 39 | GC01P178093 | 7.19 |
| AHCY | Adenosylhomocysteinase | Protein Coding | 50 | GC20M034276 | 7.19 |
| RPS6KB2 | Ribosomal Protein S6 Kinase B2 | Protein Coding | 46 | GC11P067428 | 7.19 |
| SIPA1L1 | Signal Induced Proliferation Associated 1 Like 1 | Protein Coding | 37 | GC14P071320 | 7.19 |
| CHKA | Choline Kinase Alpha | Protein Coding | 41 | GC11M068052 | 7.19 |
| PIK3R4 | Phosphoinositide-3-Kinase Regulatory Subunit 4 | Protein Coding | 47 | GC03M130678 | 7.18 |
| MAP3K8 | Mitogen-Activated Protein Kinase Kinase Kinase 8 | Protein Coding | 47 | GC10P030458 | 7.18 |
| BTK | Bruton Tyrosine Kinase | Protein Coding | 53 | GC0XM101349 | 7.18 |
| NUMA1 | Nuclear Mitotic Apparatus Protein 1 | Protein Coding | 43 | GC11M072002 | 7.18 |
| LUCAT1 | Lung Cancer Associated Transcript 1 | RNA Gene | 15 | GC05M091054 | 7.18 |
| GNB3 | G Protein Subunit Beta 3 | Protein Coding | 47 | GC12P006839 | 7.17 |
| HK2 | Hexokinase 2 | Protein Coding | 47 | GC02P074833 | 7.16 |
| ARSB | Arylsulfatase B | Protein Coding | 44 | GC05M078777 | 7.15 |
| ABCC11 | ATP Binding Cassette Subfamily C Member 11 | Protein Coding | 41 | GC16M048166 | 7.15 |
| PRKCI | Protein Kinase C Iota | Protein Coding | 48 | GC03P170222 | 7.15 |
| HNF1A | HNF1 Homeobox A | Protein Coding | 45 | GC12P120978 | 7.15 |
| ATP7A | ATPase Copper Transporting Alpha | Protein Coding | 45 | GC0XP077927 | 7.14 |
| FGF23 | Fibroblast Growth Factor 23 | Protein Coding | 45 | GC12M004368 | 7.13 |
| ATP7B | ATPase Copper Transporting Beta | Protein Coding | 47 | GC13M051930 | 7.12 |
| GSTM3 | Glutathione S-Transferase Mu 3 | Protein Coding | 45 | GC01M109733 | 7.12 |
| TFRC | Transferrin Receptor | Protein Coding | 48 | GC03M196027 | 7.11 |
| RASA1 | RAS P21 Protein Activator 1 | Protein Coding | 46 | GC05P087267 | 7.11 |
| P3H2 | Prolyl 3-Hydroxylase 2 | Protein Coding | 36 | GC03M189956 | 7.1 |
| BMP7 | Bone Morphogenetic Protein 7 | Protein Coding | 45 | GC20M057168 | 7.09 |
| CXCL10 | C-X-C Motif Chemokine Ligand 10 | Protein Coding | 44 | GC04M076021 | 7.09 |
| SERPINB3 | Serpin Family B Member 3 | Protein Coding | 42 | GC18M063655 | 7.08 |
| HP | Haptoglobin | Protein Coding | 44 | GC16P072089 | 7.08 |
| ACP1 | Acid Phosphatase 1 | Protein Coding | 44 | GC02P000254 | 7.07 |
| BCAS1 | Brain Enriched Myelin Associated Protein 1 | Protein Coding | 37 | GC20M053936 | 7.05 |
| KLK6 | Kallikrein Related Peptidase 6 | Protein Coding | 42 | GC19M050958 | 7.05 |
| ADAMTS15 | ADAM Metallopeptidase With Thrombospondin Type 1 Motif 15 | Protein Coding | 36 | GC11P130448 | 7.04 |
| IL7R | Interleukin 7 Receptor | Protein Coding | 47 | GC05P035852 | 7.04 |
| DNAH8 | Dynein Axonemal Heavy Chain 8 | Protein Coding | 37 | GC06P047481 | 7.04 |
| ATAD2 | ATPase Family AAA Domain Containing 2 | Protein Coding | 39 | GC08M123319 | 7.04 |
| PRDM2 | PR/SET Domain 2 | Protein Coding | 40 | GC01P013702 | 7.03 |
| PRKDC | Protein Kinase, DNA-Activated, Catalytic Subunit | Protein Coding | 49 | GC08M047773 | 7.03 |
| GNAQ | G Protein Subunit Alpha Q | Protein Coding | 49 | GC09M077716 | 7.03 |
| LYVE1 | Lymphatic Vessel Endothelial Hyaluronan Receptor 1 | Protein Coding | 41 | GC11M010653 | 7.03 |
| ADAMTSL3 | ADAMTS Like 3 | Protein Coding | 36 | GC15P083655 | 7.03 |
| ITGAM | Integrin Subunit Alpha M | Protein Coding | 46 | GC16P031550 | 7.03 |
| APOLD1 | Apolipoprotein L Domain Containing 1 | Protein Coding | 33 | GC12P012725 | 7.02 |
| FAM98A | Family With Sequence Similarity 98 Member A | Protein Coding | 31 | GC02M033583 | 7.02 |
| ORMDL1 | ORMDL Sphingolipid Biosynthesis Regulator 1 | Protein Coding | 35 | GC02M189770 | 7.02 |
| MBL2 | Mannose Binding Lectin 2 | Protein Coding | 47 | GC10M052760 | 7.02 |
| GAB1 | GRB2 Associated Binding Protein 1 | Protein Coding | 44 | GC04P143336 | 7.01 |
| IFNGR1 | Interferon Gamma Receptor 1 | Protein Coding | 50 | GC06M137197 | 7.01 |
| EVC2 | EvC Ciliary Complex Subunit 2 | Protein Coding | 39 | GC04M005534 | 7 |
| GATA1 | GATA Binding Protein 1 | Protein Coding | 46 | GC0XP048786 | 6.99 |
| CUBN | Cubilin | Protein Coding | 46 | GC10M016824 | 6.98 |
| TTR | Transthyretin | Protein Coding | 49 | GC18P031557 | 6.97 |
| PDGFA | Platelet Derived Growth Factor Subunit A | Protein Coding | 44 | GC07M000497 | 6.96 |
| SLC6A4 | Solute Carrier Family 6 Member 4 | Protein Coding | 47 | GC17M030194 | 6.96 |
| CCR7 | C-C Motif Chemokine Receptor 7 | Protein Coding | 45 | GC17M040556 | 6.95 |
| SPINT1 | Serine Peptidase Inhibitor, Kunitz Type 1 | Protein Coding | 40 | GC15P040844 | 6.95 |
| FUS | FUS RNA Binding Protein | Protein Coding | 44 | GC16P031180 | 6.94 |
| CD164 | CD164 Molecule | Protein Coding | 41 | GC06M109366 | 6.94 |
| RHOB | Ras Homolog Family Member B | Protein Coding | 44 | GC02P020447 | 6.93 |
| TIMELESS | Timeless Circadian Regulator | Protein Coding | 39 | GC12M056416 | 6.93 |
| RHPN2 | Rhophilin Rho GTPase Binding Protein 2 | Protein Coding | 39 | GC19M032978 | 6.92 |
| CD99 | CD99 Molecule (Xg Blood Group) | Protein Coding | 40 | GC0XP002691 | 6.92 |
| ADRB2 | Adrenoceptor Beta 2 | Protein Coding | 48 | GC05P148825 | 6.92 |
| TFAP2C | Transcription Factor AP-2 Gamma | Protein Coding | 43 | GC20P056629 | 6.91 |
| SNHG15 | Small Nucleolar RNA Host Gene 15 | RNA Gene | 18 | GC07M044983 | 6.9 |
| NR3C1 | Nuclear Receptor Subfamily 3 Group C Member 1 | Protein Coding | 50 | GC05M143277 | 6.89 |
| RBP3 | Retinol Binding Protein 3 | Protein Coding | 40 | GC10P047348 | 6.89 |
| NGFR | Nerve Growth Factor Receptor | Protein Coding | 45 | GC17P049495 | 6.89 |
| HSPD1 | Heat Shock Protein Family D (Hsp60) Member 1 | Protein Coding | 47 | GC02M197486 | 6.89 |
| MUC19 | Mucin 19, Oligomeric | Protein Coding | 29 | GC12P040393 | 6.89 |
| PIN1 | Peptidylprolyl Cis/Trans Isomerase, NIMA-Interacting 1 | Protein Coding | 47 | GC19P009835 | 6.89 |
| CYLD | CYLD Lysine 63 Deubiquitinase | Protein Coding | 48 | GC16P050742 | 6.89 |
| NQO2 | N-Ribosyldihydronicotinamide:Quinone Reductase 2 | Protein Coding | 45 | GC06P003009 | 6.87 |
| CLDN18 | Claudin 18 | Protein Coding | 40 | GC03P137998 | 6.87 |
| PLAT | Plasminogen Activator, Tissue Type | Protein Coding | 49 | GC08M042174 | 6.86 |
| MIR302A | MicroRNA 302a | RNA Gene | 20 | GC04M112679 | 6.86 |
| FLI1 | Fli-1 Proto-Oncogene, ETS Transcription Factor | Protein Coding | 49 | GC11P128686 | 6.85 |
| TUBB | Tubulin Beta Class I | Protein Coding | 49 | GC06P030720 | 6.85 |
| KDM5B | Lysine Demethylase 5B | Protein Coding | 43 | GC01M202696 | 6.85 |
| TNFRSF11B | TNF Receptor Superfamily Member 11b | Protein Coding | 47 | GC08M118923 | 6.85 |
| RPL15 | Ribosomal Protein L15 | Protein Coding | 44 | GC03P023960 | 6.84 |
| ADAMTS8 | ADAM Metallopeptidase With Thrombospondin Type 1 Motif 8 | Protein Coding | 39 | GC11M130308 | 6.83 |
| GRM1 | Glutamate Metabotropic Receptor 1 | Protein Coding | 50 | GC06P145973 | 6.83 |
| IL6ST | Interleukin 6 Signal Transducer | Protein Coding | 45 | GC05M055935 | 6.83 |
| TRB | T Cell Receptor Beta Locus | Protein Coding | 14 | GC07P145138 | 6.82 |
| IRS2 | Insulin Receptor Substrate 2 | Protein Coding | 44 | GC13M109752 | 6.81 |
| CTCF | CCCTC-Binding Factor | Protein Coding | 46 | GC16P067563 | 6.8 |
| ZMYND10 | Zinc Finger MYND-Type Containing 10 | Protein Coding | 39 | GC03M050389 | 6.8 |
| NCOA2 | Nuclear Receptor Coactivator 2 | Protein Coding | 44 | GC08M070109 | 6.8 |
| SRGAP1 | SLIT-ROBO Rho GTPase Activating Protein 1 | Protein Coding | 42 | GC12P063844 | 6.79 |
| MIR449A | MicroRNA 449a | RNA Gene | 20 | GC05M055171 | 6.79 |
| NCOA1 | Nuclear Receptor Coactivator 1 | Protein Coding | 44 | GC02P024492 | 6.78 |
| FSHR | Follicle Stimulating Hormone Receptor | Protein Coding | 49 | GC02M048953 | 6.78 |
| LPAR1 | Lysophosphatidic Acid Receptor 1 | Protein Coding | 45 | GC09M110873 | 6.78 |
| DROSHA | Drosha Ribonuclease III | Protein Coding | 41 | GC05M031401 | 6.78 |
| MAGEC2 | MAGE Family Member C2 | Protein Coding | 36 | GC0XM142202 | 6.77 |
| HLA-DQA1 | Major Histocompatibility Complex, Class II, DQ Alpha 1 | Protein Coding | 42 | GC06P047340 | 6.75 |
| MAPK7 | Mitogen-Activated Protein Kinase 7 | Protein Coding | 48 | GC17P019379 | 6.74 |
| XPO1 | Exportin 1 | Protein Coding | 45 | GC02M061445 | 6.74 |
| RAD52 | RAD52 Homolog, DNA Repair Protein | Protein Coding | 41 | GC12M000912 | 6.74 |
| IRS4 | Insulin Receptor Substrate 4 | Protein Coding | 39 | GC0XM108720 | 6.74 |
| CCNA1 | Cyclin A1 | Protein Coding | 42 | GC13P036431 | 6.74 |
| HSPA1A | Heat Shock Protein Family A (Hsp70) Member 1A | Protein Coding | 43 | GC06P047326 | 6.74 |
| GCM2 | Glial Cells Missing Transcription Factor 2 | Protein Coding | 41 | GC06M010873 | 6.73 |
| SPDEF | SAM Pointed Domain Containing ETS Transcription Factor | Protein Coding | 39 | GC06M042210 | 6.7 |
| PON1 | Paraoxonase 1 | Protein Coding | 45 | GC07M095297 | 6.7 |
| RPS6 | Ribosomal Protein S6 | Protein Coding | 44 | GC09M019375 | 6.69 |
| SF3B1 | Splicing Factor 3b Subunit 1 | Protein Coding | 44 | GC02M197389 | 6.68 |
| HSF1 | Heat Shock Transcription Factor 1 | Protein Coding | 44 | GC08P144291 | 6.68 |
| SLC2A3 | Solute Carrier Family 2 Member 3 | Protein Coding | 48 | GC12M007919 | 6.67 |
| KRT10 | Keratin 10 | Protein Coding | 42 | GC17M040818 | 6.67 |
| G6PD | Glucose-6-Phosphate Dehydrogenase | Protein Coding | 50 | GC0XM154531 | 6.67 |
| SLC45A3 | Solute Carrier Family 45 Member 3 | Protein Coding | 39 | GC01M205626 | 6.67 |
| MIR371A | MicroRNA 371a | RNA Gene | 16 | GC19P053787 | 6.66 |
| MIR133A1 | MicroRNA 133a-1 | RNA Gene | 17 | GC18M021826 | 6.66 |
| CBFA2T3 | CBFA2/RUNX1 Partner Transcriptional Co-Repressor 3 | Protein Coding | 40 | GC16M088874 | 6.63 |
| TNFRSF10C | TNF Receptor Superfamily Member 10c | Protein Coding | 39 | GC08P023102 | 6.63 |
| RRM1 | Ribonucleotide Reductase Catalytic Subunit M1 | Protein Coding | 47 | GC11P004115 | 6.62 |
| HOXA10 | Homeobox A10 | Protein Coding | 42 | GC07M027262 | 6.62 |
| TP53BP1 | Tumor Protein P53 Binding Protein 1 | Protein Coding | 44 | GC15M043403 | 6.62 |
| IL16 | Interleukin 16 | Protein Coding | 42 | GC15P081159 | 6.61 |
| MIR671 | MicroRNA 671 | RNA Gene | 17 | GC07P151238 | 6.61 |
| TF | Transferrin | Protein Coding | 49 | GC03P133666 | 6.61 |
| UCHL1 | Ubiquitin C-Terminal Hydrolase L1 | Protein Coding | 51 | GC04P041256 | 6.61 |
| MIR452 | MicroRNA 452 | RNA Gene | 15 | GC0XM151959 | 6.61 |
| SSTR2 | Somatostatin Receptor 2 | Protein Coding | 47 | GC17P073165 | 6.6 |
| BCL11B | BAF Chromatin Remodeling Complex Subunit BCL11B | Protein Coding | 42 | GC14M099169 | 6.6 |
| CDC25B | Cell Division Cycle 25B | Protein Coding | 46 | GC20P003787 | 6.59 |
| TOE1 | Target Of EGR1, Exonuclease | Protein Coding | 38 | GC01P045339 | 6.59 |
| IGFBP5 | Insulin Like Growth Factor Binding Protein 5 | Protein Coding | 43 | GC02M216672 | 6.59 |
| PELP1 | Proline, Glutamate And Leucine Rich Protein 1 | Protein Coding | 39 | GC17M004669 | 6.59 |
| PGF | Placental Growth Factor | Protein Coding | 43 | GC14M074941 | 6.59 |
| MCM2 | Minichromosome Maintenance Complex Component 2 | Protein Coding | 47 | GC03P127598 | 6.58 |
| ATP12A | ATPase H+/K+ Transporting Non-Gastric Alpha2 Subunit | Protein Coding | 43 | GC13P024680 | 6.58 |
| VTN | Vitronectin | Protein Coding | 44 | GC17M029955 | 6.58 |
| URI1 | URI1 Prefoldin Like Chaperone | Protein Coding | 36 | GC19P029923 | 6.57 |
| ARHGEF1 | Rho Guanine Nucleotide Exchange Factor 1 | Protein Coding | 44 | GC19P041883 | 6.57 |
| APOA1 | Apolipoprotein A1 | Protein Coding | 48 | GC11M116835 | 6.56 |
| RCN1 | Reticulocalbin 1 | Protein Coding | 39 | GC11P032090 | 6.56 |
| MIR129-1 | MicroRNA 129-1 | RNA Gene | 17 | GC07P128207 | 6.56 |
| TNFRSF6B | TNF Receptor Superfamily Member 6b | Protein Coding | 43 | GC20P063696 | 6.55 |
| GH1 | Growth Hormone 1 | Protein Coding | 44 | GC17M063917 | 6.55 |
| AGTR1 | Angiotensin II Receptor Type 1 | Protein Coding | 51 | GC03P148697 | 6.55 |
| EGLN3 | Egl-9 Family Hypoxia Inducible Factor 3 | Protein Coding | 46 | GC14M033924 | 6.55 |
| SFN | Stratifin | Protein Coding | 46 | GC01P026873 | 6.54 |
| VEGFB | Vascular Endothelial Growth Factor B | Protein Coding | 44 | GC11P064234 | 6.54 |
| GCLC | Glutamate-Cysteine Ligase Catalytic Subunit | Protein Coding | 43 | GC06M053497 | 6.54 |
| WNK1 | WNK Lysine Deficient Protein Kinase 1 | Protein Coding | 46 | GC12P000733 | 6.54 |
| PTK6 | Protein Tyrosine Kinase 6 | Protein Coding | 47 | GC20M063528 | 6.54 |
| MIR520C | MicroRNA 520c | RNA Gene | 18 | GC19P054624 | 6.53 |
| PLCD4 | Phospholipase C Delta 4 | Protein Coding | 43 | GC02P218608 | 6.53 |
| PLD2 | Phospholipase D2 | Protein Coding | 47 | GC17P004808 | 6.52 |
| HNRNPK | Heterogeneous Nuclear Ribonucleoprotein K | Protein Coding | 45 | GC09M084056 | 6.52 |
| PHLDB1 | Pleckstrin Homology Like Domain Family B Member 1 | Protein Coding | 37 | GC11P118606 | 6.51 |
| GATA6 | GATA Binding Protein 6 | Protein Coding | 47 | GC18P022169 | 6.51 |
| APP | Amyloid Beta Precursor Protein | Protein Coding | 51 | GC21M025880 | 6.51 |
| CIP2A | Cellular Inhibitor Of PP2A | Protein Coding | 28 | GC03M108545 | 6.51 |
| NES | Nestin | Protein Coding | 39 | GC01M156668 | 6.5 |
| DUOX2 | Dual Oxidase 2 | Protein Coding | 43 | GC15M045092 | 6.5 |
| RHOC | Ras Homolog Family Member C | Protein Coding | 41 | GC01M112701 | 6.5 |
| CSF3R | Colony Stimulating Factor 3 Receptor | Protein Coding | 47 | GC01M036466 | 6.49 |
| FAM98B | Family With Sequence Similarity 98 Member B | Protein Coding | 32 | GC15P038454 | 6.49 |
| NODAL | Nodal Growth Differentiation Factor | Protein Coding | 42 | GC10M070431 | 6.49 |
| IL23A | Interleukin 23 Subunit Alpha | Protein Coding | 39 | GC12P056335 | 6.49 |
| CXCR3 | C-X-C Motif Chemokine Receptor 3 | Protein Coding | 44 | GC0XM071615 | 6.47 |
| CETN3 | Centrin 3 | Protein Coding | 39 | GC05M090392 | 6.47 |
| S100A2 | S100 Calcium Binding Protein A2 | Protein Coding | 40 | GC01M153561 | 6.47 |
| LBR | Lamin B Receptor | Protein Coding | 47 | GC01M225401 | 6.46 |
| EFNA1 | Ephrin A1 | Protein Coding | 43 | GC01P155127 | 6.46 |
| NFIB | Nuclear Factor I B | Protein Coding | 43 | GC09M014077 | 6.45 |
| CISH | Cytokine Inducible SH2 Containing Protein | Protein Coding | 44 | GC03M050618 | 6.45 |
| IQGAP1 | IQ Motif Containing GTPase Activating Protein 1 | Protein Coding | 43 | GC15P090388 | 6.44 |
| BNIP3 | BCL2 Interacting Protein 3 | Protein Coding | 42 | GC10M131966 | 6.44 |
| ANK2 | Ankyrin 2 | Protein Coding | 41 | GC04P112706 | 6.44 |
| ARID1B | AT-Rich Interaction Domain 1B | Protein Coding | 44 | GC06P156777 | 6.44 |
| MIR212 | MicroRNA 212 | RNA Gene | 19 | GC17M002050 | 6.43 |
| ZMIZ1 | Zinc Finger MIZ-Type Containing 1 | Protein Coding | 39 | GC10P079068 | 6.43 |
| FABP4 | Fatty Acid Binding Protein 4 | Protein Coding | 44 | GC08M081478 | 6.42 |
| LDHA | Lactate Dehydrogenase A | Protein Coding | 51 | GC11P018394 | 6.42 |
| HEMGN | Hemogen | Protein Coding | 35 | GC09M097927 | 6.42 |
| POU5F1B | POU Class 5 Homeobox 1B | Protein Coding | 32 | GC08P127322 | 6.42 |
| DDX5 | DEAD-Box Helicase 5 | Protein Coding | 46 | GC17M064498 | 6.41 |
| MAP2 | Microtubule Associated Protein 2 | Protein Coding | 42 | GC02P209424 | 6.41 |
| GALNS | Galactosamine (N-Acetyl)-6-Sulfatase | Protein Coding | 44 | GC16M088813 | 6.41 |
| ATP4A | ATPase H+/K+ Transporting Subunit Alpha | Protein Coding | 41 | GC19M042544 | 6.41 |
| CD9 | CD9 Molecule | Protein Coding | 44 | GC12P008124 | 6.4 |
| MKRN3 | Makorin Ring Finger Protein 3 | Protein Coding | 39 | GC15P024594 | 6.4 |
| MIR124-3 | MicroRNA 124-3 | RNA Gene | 17 | GC20P063180 | 6.4 |
| PAX6 | Paired Box 6 | Protein Coding | 47 | GC11M031784 | 6.4 |
| MTRR | 5-Methyltetrahydrofolate-Homocysteine Methyltransferase Reductase | Protein Coding | 43 | GC05P007851 | 6.38 |
| ZDHHC2 | Zinc Finger DHHC-Type Palmitoyltransferase 2 | Protein Coding | 38 | GC08P017156 | 6.38 |
| MIR134 | MicroRNA 134 | RNA Gene | 18 | GC14P104777 | 6.37 |
| HMGCR | 3-Hydroxy-3-Methylglutaryl-CoA Reductase | Protein Coding | 45 | GC05P075336 | 6.36 |
| DCK | Deoxycytidine Kinase | Protein Coding | 45 | GC04P070992 | 6.35 |
| TBX3 | T-Box Transcription Factor 3 | Protein Coding | 45 | GC12M114670 | 6.35 |
| CUX1 | Cut Like Homeobox 1 | Protein Coding | 43 | GC07P101815 | 6.35 |
| PLIN2 | Perilipin 2 | Protein Coding | 43 | GC09M019115 | 6.34 |
| VTI1A | Vesicle Transport Through Interaction With T-SNAREs 1A | Protein Coding | 39 | GC10P112446 | 6.34 |
| RETN | Resistin | Protein Coding | 43 | GC19P007669 | 6.34 |
| PRF1 | Perforin 1 | Protein Coding | 45 | GC10M070597 | 6.33 |
| MIR495 | MicroRNA 495 | RNA Gene | 16 | GC14P104815 | 6.33 |
| MAP1B | Microtubule Associated Protein 1B | Protein Coding | 43 | GC05P072107 | 6.33 |
| SMAD9 | SMAD Family Member 9 | Protein Coding | 45 | GC13M036844 | 6.31 |
| STC1 | Stanniocalcin 1 | Protein Coding | 40 | GC08M023841 | 6.31 |
| ALPP | Alkaline Phosphatase, Placental | Protein Coding | 46 | GC02P232378 | 6.31 |
| PCDH12 | Protocadherin 12 | Protein Coding | 39 | GC05M141943 | 6.3 |
| RNF6 | Ring Finger Protein 6 | Protein Coding | 39 | GC13M026132 | 6.3 |
| S100A9 | S100 Calcium Binding Protein A9 | Protein Coding | 43 | GC01P153357 | 6.3 |
| VTCN1 | V-Set Domain Containing T Cell Activation Inhibitor 1 | Protein Coding | 40 | GC01M117143 | 6.3 |
| CCR5 | C-C Motif Chemokine Receptor 5 | Protein Coding | 46 | GC03P046383 | 6.29 |
| FGF6 | Fibroblast Growth Factor 6 | Protein Coding | 40 | GC12M004413 | 6.29 |
| SYNJ2BP | Synaptojanin 2 Binding Protein | Protein Coding | 37 | GC14M070366 | 6.29 |
| S100P | S100 Calcium Binding Protein P | Protein Coding | 40 | GC04P006700 | 6.29 |
| CCL11 | C-C Motif Chemokine Ligand 11 | Protein Coding | 43 | GC17P034285 | 6.29 |
| PIAS1 | Protein Inhibitor Of Activated STAT 1 | Protein Coding | 44 | GC15P068054 | 6.28 |
| HDAC6 | Histone Deacetylase 6 | Protein Coding | 51 | GC0XP048801 | 6.28 |
| ZBTB16 | Zinc Finger And BTB Domain Containing 16 | Protein Coding | 46 | GC11P114059 | 6.28 |
| LOXL2 | Lysyl Oxidase Like 2 | Protein Coding | 44 | GC08M023296 | 6.28 |
| MAGED2 | MAGE Family Member D2 | Protein Coding | 39 | GC0XP054807 | 6.27 |
| SIRT3 | Sirtuin 3 | Protein Coding | 48 | GC11M000215 | 6.26 |
| CHI3L1 | Chitinase 3 Like 1 | Protein Coding | 43 | GC01M203148 | 6.26 |
| HAVCR2 | Hepatitis A Virus Cellular Receptor 2 | Protein Coding | 43 | GC05M157063 | 6.26 |
| DUSP13 | Dual Specificity Phosphatase 13 | Protein Coding | 39 | GC10M075094 | 6.26 |
| EIF3H | Eukaryotic Translation Initiation Factor 3 Subunit H | Protein Coding | 40 | GC08M116642 | 6.25 |
| CLOCK | Clock Circadian Regulator | Protein Coding | 43 | GC04M055427 | 6.25 |
| FBLN1 | Fibulin 1 | Protein Coding | 43 | GC22P045502 | 6.24 |
| CDH5 | Cadherin 5 | Protein Coding | 47 | GC16P066366 | 6.24 |
| RPTOR | Regulatory Associated Protein Of MTOR Complex 1 | Protein Coding | 44 | GC17P080544 | 6.24 |
| PFKFB3 | 6-Phosphofructo-2-Kinase/Fructose-2,6-Biphosphatase 3 | Protein Coding | 44 | GC10P006144 | 6.24 |
| KRR1 | KRR1 Small Subunit Processome Component Homolog | Protein Coding | 38 | GC12M075490 | 6.22 |
| ADAM9 | ADAM Metallopeptidase Domain 9 | Protein Coding | 47 | GC08P038996 | 6.22 |
| SFTPC | Surfactant Protein C | Protein Coding | 43 | GC08P022156 | 6.22 |
| CD27 | CD27 Molecule | Protein Coding | 45 | GC12P008144 | 6.22 |
| LINC00673 | Long Intergenic Non-Protein Coding RNA 673 | RNA Gene | 16 | GC17M072290 | 6.22 |
| HSP90AB1 | Heat Shock Protein 90 Alpha Family Class B Member 1 | Protein Coding | 45 | GC06P044246 | 6.21 |
| KCNH1 | Potassium Voltage-Gated Channel Subfamily H Member 1 | Protein Coding | 46 | GC01M210678 | 6.21 |
| NKX3-1 | NK3 Homeobox 1 | Protein Coding | 41 | GC08M023678 | 6.19 |
| IL22 | Interleukin 22 | Protein Coding | 41 | GC12M068248 | 6.19 |
| RXRB | Retinoid X Receptor Beta | Protein Coding | 47 | GC06M033193 | 6.19 |
| PIP | Prolactin Induced Protein | Protein Coding | 37 | GC07P143132 | 6.19 |
| MCM4 | Minichromosome Maintenance Complex Component 4 | Protein Coding | 47 | GC08P047965 | 6.17 |
| PPARGC1A | PPARG Coactivator 1 Alpha | Protein Coding | 46 | GC04M023755 | 6.17 |
| ADAM12 | ADAM Metallopeptidase Domain 12 | Protein Coding | 45 | GC10M126012 | 6.17 |
| MECP2 | Methyl-CpG Binding Protein 2 | Protein Coding | 45 | GC0XM154021 | 6.17 |
| FGF19 | Fibroblast Growth Factor 19 | Protein Coding | 44 | GC11M069699 | 6.16 |
| CR2 | Complement C3d Receptor 2 | Protein Coding | 44 | GC01P207454 | 6.16 |
| TRIM24 | Tripartite Motif Containing 24 | Protein Coding | 43 | GC07P138460 | 6.15 |
| SURF4 | Surfeit 4 | Protein Coding | 38 | GC09M133361 | 6.15 |
| CXCR1 | C-X-C Motif Chemokine Receptor 1 | Protein Coding | 43 | GC02M218162 | 6.14 |
| GJB2 | Gap Junction Protein Beta 2 | Protein Coding | 47 | GC13M020187 | 6.14 |
| IL12B | Interleukin 12B | Protein Coding | 44 | GC05M159314 | 6.14 |
| FGFBP1 | Fibroblast Growth Factor Binding Protein 1 | Protein Coding | 40 | GC04M015937 | 6.14 |
| MIR370 | MicroRNA 370 | RNA Gene | 20 | GC14P104575 | 6.13 |
| EI24 | EI24 Autophagy Associated Transmembrane Protein | Protein Coding | 36 | GC11P125570 | 6.13 |
| WEE1 | WEE1 G2 Checkpoint Kinase | Protein Coding | 46 | GC11P009573 | 6.13 |
| F2R | Coagulation Factor II Thrombin Receptor | Protein Coding | 46 | GC05P076716 | 6.13 |
| SALL4 | Spalt Like Transcription Factor 4 | Protein Coding | 43 | GC20M051784 | 6.13 |
| SPHK1 | Sphingosine Kinase 1 | Protein Coding | 47 | GC17P076376 | 6.12 |
| TENM1 | Teneurin Transmembrane Protein 1 | Protein Coding | 35 | GC0XM124375 | 6.12 |
| SULF1 | Sulfatase 1 | Protein Coding | 41 | GC08P069466 | 6.12 |
| ACACA | Acetyl-CoA Carboxylase Alpha | Protein Coding | 48 | GC17M037084 | 6.12 |
| AKR1B10 | Aldo-Keto Reductase Family 1 Member B10 | Protein Coding | 43 | GC07P134527 | 6.11 |
| IL2RB | Interleukin 2 Receptor Subunit Beta | Protein Coding | 48 | GC22M037125 | 6.11 |
| MIR202 | MicroRNA 202 | RNA Gene | 17 | GC10M133247 | 6.11 |
| PLEK | Pleckstrin | Protein Coding | 40 | GC02P068365 | 6.1 |
| STIM1 | Stromal Interaction Molecule 1 | Protein Coding | 48 | GC11P003855 | 6.1 |
| CTSL | Cathepsin L | Protein Coding | 46 | GC09P087725 | 6.09 |
| BCL2A1 | BCL2 Related Protein A1 | Protein Coding | 41 | GC15M079961 | 6.09 |
| HES1 | Hes Family BHLH Transcription Factor 1 | Protein Coding | 43 | GC03P194136 | 6.09 |
| CSNK2A1 | Casein Kinase 2 Alpha 1 | Protein Coding | 51 | GC20M000472 | 6.08 |
| CLEC2A | C-Type Lectin Domain Family 2 Member A | Protein Coding | 30 | GC12M013859 | 6.08 |
| MAD2L1 | Mitotic Arrest Deficient 2 Like 1 | Protein Coding | 45 | GC04M120055 | 6.08 |
| STARD13 | StAR Related Lipid Transfer Domain Containing 13 | Protein Coding | 39 | GC13M033103 | 6.07 |
| GPNMB | Glycoprotein Nmb | Protein Coding | 44 | GC07P023238 | 6.07 |
| LAMA5 | Laminin Subunit Alpha 5 | Protein Coding | 42 | GC20M062307 | 6.07 |
| REL | REL Proto-Oncogene, NF-KB Subunit | Protein Coding | 46 | GC02P060881 | 6.06 |
| AKT1S1 | AKT1 Substrate 1 | Protein Coding | 40 | GC19M049869 | 6.06 |
| SMC1A | Structural Maintenance Of Chromosomes 1A | Protein Coding | 45 | GC0XM053374 | 6.06 |
| CHD7 | Chromodomain Helicase DNA Binding Protein 7 | Protein Coding | 45 | GC08P060678 | 6.05 |
| NR1I2 | Nuclear Receptor Subfamily 1 Group I Member 2 | Protein Coding | 45 | GC03P119780 | 6.05 |
| MIR661 | MicroRNA 661 | RNA Gene | 17 | GC08M143945 | 6.05 |
| MIR503 | MicroRNA 503 | RNA Gene | 17 | GC0XM134626 | 6.04 |
| DKK3 | Dickkopf WNT Signaling Pathway Inhibitor 3 | Protein Coding | 40 | GC11M011962 | 6.04 |
| MIR346 | MicroRNA 346 | RNA Gene | 18 | GC10M086264 | 6.02 |
| ARHGEF4 | Rho Guanine Nucleotide Exchange Factor 4 | Protein Coding | 40 | GC02P130836 | 6.02 |
| BCL3 | BCL3 Transcription Coactivator | Protein Coding | 41 | GC19P044747 | 6.01 |
| ANG | Angiogenin | Protein Coding | 45 | GC14P020830 | 6.01 |
| FEN1 | Flap Structure-Specific Endonuclease 1 | Protein Coding | 46 | GC11P061811 | 6.01 |
| RPS10 | Ribosomal Protein S10 | Protein Coding | 44 | GC06M042209 | 6 |
| RPS27 | Ribosomal Protein S27 | Protein Coding | 41 | GC01P153991 | 6 |
| STAT4 | Signal Transducer And Activator Of Transcription 4 | Protein Coding | 45 | GC02M191029 | 6 |
| FDPS | Farnesyl Diphosphate Synthase | Protein Coding | 45 | GC01P155308 | 6 |
| FOXC2 | Forkhead Box C2 | Protein Coding | 44 | GC16P086567 | 5.99 |
| AKAP3 | A-Kinase Anchoring Protein 3 | Protein Coding | 36 | GC12M004614 | 5.99 |
| TRAF6 | TNF Receptor Associated Factor 6 | Protein Coding | 47 | GC11M036467 | 5.99 |
| TNK2 | Tyrosine Kinase Non Receptor 2 | Protein Coding | 44 | GC03M195863 | 5.99 |
| VCAM1 | Vascular Cell Adhesion Molecule 1 | Protein Coding | 45 | GC01P100719 | 5.97 |
| TAP1 | Transporter 1, ATP Binding Cassette Subfamily B Member | Protein Coding | 47 | GC06M032865 | 5.97 |
| HYAL1 | Hyaluronidase 1 | Protein Coding | 45 | GC03M050299 | 5.96 |
| LIG3 | DNA Ligase 3 | Protein Coding | 44 | GC17P034980 | 5.95 |
| MIOS | Meiosis Regulator For Oocyte Development | Protein Coding | 37 | GC07P007574 | 5.94 |
| SLC9A3R1 | SLC9A3 Regulator 1 | Protein Coding | 44 | GC17P074749 | 5.94 |
| ELOC | Elongin C | Protein Coding | 33 | GC08M073939 | 5.94 |
| TBX22 | T-Box Transcription Factor 22 | Protein Coding | 38 | GC0XP080014 | 5.94 |
| LMNB2 | Lamin B2 | Protein Coding | 43 | GC19M002439 | 5.94 |
| OCA2 | OCA2 Melanosomal Transmembrane Protein | Protein Coding | 43 | GC15M027754 | 5.93 |
| ADAM19 | ADAM Metallopeptidase Domain 19 | Protein Coding | 41 | GC05M157395 | 5.93 |
| POLB | DNA Polymerase Beta | Protein Coding | 47 | GC08P042338 | 5.93 |
| IL5 | Interleukin 5 | Protein Coding | 44 | GC05M132541 | 5.92 |
| MRPS23 | Mitochondrial Ribosomal Protein S23 | Protein Coding | 37 | GC17M057834 | 5.92 |
| ZW10 | Zw10 Kinetochore Protein | Protein Coding | 37 | GC11M113733 | 5.92 |
| RPS29 | Ribosomal Protein S29 | Protein Coding | 41 | GC14M049570 | 5.91 |
| TPD52 | Tumor Protein D52 | Protein Coding | 40 | GC08M080034 | 5.91 |
| CDK7 | Cyclin Dependent Kinase 7 | Protein Coding | 46 | GC05P069243 | 5.9 |
| FGL1 | Fibrinogen Like 1 | Protein Coding | 40 | GC08M017864 | 5.9 |
| ACTN4 | Actinin Alpha 4 | Protein Coding | 46 | GC19P038647 | 5.9 |
| GLI2 | GLI Family Zinc Finger 2 | Protein Coding | 47 | GC02P120735 | 5.89 |
| TCN2 | Transcobalamin 2 | Protein Coding | 44 | GC22P030606 | 5.89 |
| PBRM1 | Polybromo 1 | Protein Coding | 44 | GC03M052545 | 5.89 |
| MIR330 | MicroRNA 330 | RNA Gene | 18 | GC19M045663 | 5.87 |
| COL4A6 | Collagen Type IV Alpha 6 Chain | Protein Coding | 44 | GC0XM108155 | 5.87 |
| ZKSCAN3 | Zinc Finger With KRAB And SCAN Domains 3 | Protein Coding | 33 | GC06P028349 | 5.86 |
| CCL20 | C-C Motif Chemokine Ligand 20 | Protein Coding | 43 | GC02P227813 | 5.85 |
| SLC11A2 | Solute Carrier Family 11 Member 2 | Protein Coding | 47 | GC12M050952 | 5.85 |
| DCN | Decorin | Protein Coding | 47 | GC12M091140 | 5.85 |
| CCP110 | Centriolar Coiled-Coil Protein 110 | Protein Coding | 36 | GC16P019536 | 5.84 |
| ROR2 | Receptor Tyrosine Kinase Like Orphan Receptor 2 | Protein Coding | 48 | GC09M091564 | 5.84 |
| AGT | Angiotensinogen | Protein Coding | 49 | GC01M230702 | 5.84 |
| IKZF1 | IKAROS Family Zinc Finger 1 | Protein Coding | 47 | GC07P050303 | 5.84 |
| TGIF1 | TGFB Induced Factor Homeobox 1 | Protein Coding | 45 | GC18P003411 | 5.84 |
| CACNB2 | Calcium Voltage-Gated Channel Auxiliary Subunit Beta 2 | Protein Coding | 47 | GC10P018165 | 5.83 |
| CKS1B | CDC28 Protein Kinase Regulatory Subunit 1B | Protein Coding | 41 | GC01P154974 | 5.83 |
| RIOX2 | Ribosomal Oxygenase 2 | Protein Coding | 31 | GC03M097942 | 5.83 |
| LYPD1 | LY6/PLAUR Domain Containing 1 | Protein Coding | 37 | GC02M132644 | 5.83 |
| KRT1 | Keratin 1 | Protein Coding | 44 | GC12M052674 | 5.82 |
| ADNP | Activity Dependent Neuroprotector Homeobox | Protein Coding | 41 | GC20M050888 | 5.82 |
| PTP4A3 | Protein Tyrosine Phosphatase 4A3 | Protein Coding | 41 | GC08P141391 | 5.81 |
| CDH17 | Cadherin 17 | Protein Coding | 41 | GC08M094127 | 5.81 |
| DUSP1 | Dual Specificity Phosphatase 1 | Protein Coding | 47 | GC05M172768 | 5.81 |
| ADAM29 | ADAM Metallopeptidase Domain 29 | Protein Coding | 37 | GC04P174831 | 5.8 |
| RAB5IF | RAB5 Interacting Factor | Protein Coding | 24 | GC20P036606 | 5.8 |
| TBK1 | TANK Binding Kinase 1 | Protein Coding | 49 | GC12P064451 | 5.79 |
| SDC1 | Syndecan 1 | Protein Coding | 43 | GC02M020200 | 5.79 |
| HDAC5 | Histone Deacetylase 5 | Protein Coding | 47 | GC17M044076 | 5.79 |
| OLA1 | Obg Like ATPase 1 | Protein Coding | 43 | GC02M174072 | 5.78 |
| DLL4 | Delta Like Canonical Notch Ligand 4 | Protein Coding | 45 | GC15P040929 | 5.78 |
| HAGLR | HOXD Antisense Growth-Associated Long Non-Coding RNA | RNA Gene | 16 | GC02M176173 | 5.78 |
| RAB25 | RAB25, Member RAS Oncogene Family | Protein Coding | 39 | GC01P156061 | 5.78 |
| GHRH | Growth Hormone Releasing Hormone | Protein Coding | 40 | GC20M037251 | 5.77 |
| CDC6 | Cell Division Cycle 6 | Protein Coding | 45 | GC17P040287 | 5.77 |
| ELF3 | E74 Like ETS Transcription Factor 3 | Protein Coding | 39 | GC01P202007 | 5.77 |
| RASGRF2 | Ras Protein Specific Guanine Nucleotide Releasing Factor 2 | Protein Coding | 38 | GC05P080960 | 5.76 |
| RAC3 | Rac Family Small GTPase 3 | Protein Coding | 45 | GC17P082031 | 5.76 |
| NRP2 | Neuropilin 2 | Protein Coding | 43 | GC02P205681 | 5.76 |
| CAD | Carbamoyl-Phosphate Synthetase 2, Aspartate Transcarbamylase, And Dihydroorotase | Protein Coding | 50 | GC02P027217 | 5.75 |
| KLK15 | Kallikrein Related Peptidase 15 | Protein Coding | 41 | GC19M050825 | 5.75 |
| HSPG2 | Heparan Sulfate Proteoglycan 2 | Protein Coding | 45 | GC01M021822 | 5.75 |
| IL11 | Interleukin 11 | Protein Coding | 41 | GC19M055364 | 5.75 |
| UBE2C | Ubiquitin Conjugating Enzyme E2 C | Protein Coding | 47 | GC20P045812 | 5.74 |
| MIR92A2 | MicroRNA 92a-2 | RNA Gene | 16 | GC0XM134206 | 5.73 |
| FOXP1 | Forkhead Box P1 | Protein Coding | 45 | GC03M070926 | 5.73 |
| ROCK2 | Rho Associated Coiled-Coil Containing Protein Kinase 2 | Protein Coding | 47 | GC02M011192 | 5.73 |
| SORL1 | Sortilin Related Receptor 1 | Protein Coding | 43 | GC11P121452 | 5.73 |
| MMP26 | Matrix Metallopeptidase 26 | Protein Coding | 34 | GC11P004706 | 5.72 |
| GHRHR | Growth Hormone Releasing Hormone Receptor | Protein Coding | 43 | GC07P030978 | 5.72 |
| MANBAL | Mannosidase Beta Like | Protein Coding | 32 | GC20P037289 | 5.71 |
| EMSY | EMSY Transcriptional Repressor, BRCA2 Interacting | Protein Coding | 31 | GC11P076445 | 5.71 |
| TYRP1 | Tyrosinase Related Protein 1 | Protein Coding | 46 | GC09P012683 | 5.71 |
| RPSA | Ribosomal Protein SA | Protein Coding | 44 | GC03P039406 | 5.7 |
| MIR494 | MicroRNA 494 | RNA Gene | 17 | GC14P104814 | 5.7 |
| HAND2-AS1 | HAND2 Antisense RNA 1 | RNA Gene | 20 | GC04P173527 | 5.69 |
| MLST8 | MTOR Associated Protein, LST8 Homolog | Protein Coding | 42 | GC16P002204 | 5.69 |
| ANKRD30A | Ankyrin Repeat Domain 30A | Protein Coding | 36 | GC10P037134 | 5.67 |
| PSMB9 | Proteasome 20S Subunit Beta 9 | Protein Coding | 46 | GC06P047342 | 5.67 |
| NET1 | Neuroepithelial Cell Transforming 1 | Protein Coding | 43 | GC10P005444 | 5.67 |
| G6PC | Glucose-6-Phosphatase Catalytic Subunit | Protein Coding | 44 | GC17P042900 | 5.67 |
| FLNB | Filamin B | Protein Coding | 45 | GC03P058008 | 5.67 |
| COL4A2 | Collagen Type IV Alpha 2 Chain | Protein Coding | 44 | GC13P110305 | 5.66 |
| HIPK2 | Homeodomain Interacting Protein Kinase 2 | Protein Coding | 44 | GC07M139561 | 5.66 |
| MCRS1 | Microspherule Protein 1 | Protein Coding | 37 | GC12M049557 | 5.65 |
| RBBP8 | RB Binding Protein 8, Endonuclease | Protein Coding | 44 | GC18P022798 | 5.65 |
| LIN28B | Lin-28 Homolog B | Protein Coding | 41 | GC06P104940 | 5.65 |
| FOXF1 | Forkhead Box F1 | Protein Coding | 41 | GC16P086510 | 5.64 |
| NCOR2 | Nuclear Receptor Corepressor 2 | Protein Coding | 43 | GC12M124324 | 5.64 |
| BEX2 | Brain Expressed X-Linked 2 | Protein Coding | 31 | GC0XM103309 | 5.64 |
| SMARCA2 | SWI/SNF Related, Matrix Associated, Actin Dependent Regulator Of Chromatin, Subfamily A, Member 2 | Protein Coding | 49 | GC09P001980 | 5.64 |
| THRB | Thyroid Hormone Receptor Beta | Protein Coding | 50 | GC03M024117 | 5.64 |
| TIGAR | TP53 Induced Glycolysis Regulatory Phosphatase | Protein Coding | 38 | GC12P008104 | 5.64 |
| CA2 | Carbonic Anhydrase 2 | Protein Coding | 51 | GC08P085463 | 5.63 |
| DNASE1L3 | Deoxyribonuclease 1 Like 3 | Protein Coding | 43 | GC03M058192 | 5.63 |
| NNMT | Nicotinamide N-Methyltransferase | Protein Coding | 45 | GC11P114257 | 5.63 |
| PRKAA2 | Protein Kinase AMP-Activated Catalytic Subunit Alpha 2 | Protein Coding | 50 | GC01P056645 | 5.63 |
| MYH1 | Myosin Heavy Chain 1 | Protein Coding | 40 | GC17M010492 | 5.62 |
| TNFAIP3 | TNF Alpha Induced Protein 3 | Protein Coding | 48 | GC06P137866 | 5.62 |
| MIR361 | MicroRNA 361 | RNA Gene | 16 | GC0XM085903 | 5.61 |
| CDKL5 | Cyclin Dependent Kinase Like 5 | Protein Coding | 43 | GC0XP018425 | 5.61 |
| SPTAN1 | Spectrin Alpha, Non-Erythrocytic 1 | Protein Coding | 47 | GC09P128552 | 5.6 |
| VAV3 | Vav Guanine Nucleotide Exchange Factor 3 | Protein Coding | 43 | GC01M107571 | 5.6 |
| PDX1 | Pancreatic And Duodenal Homeobox 1 | Protein Coding | 47 | GC13P027921 | 5.6 |
| COL1A2 | Collagen Type I Alpha 2 Chain | Protein Coding | 47 | GC07P094394 | 5.6 |
| ZFP36 | ZFP36 Ring Finger Protein | Protein Coding | 39 | GC19P039406 | 5.6 |
| KMT2D | Lysine Methyltransferase 2D | Protein Coding | 41 | GC12M049018 | 5.59 |
| CASP1 | Caspase 1 | Protein Coding | 50 | GC11M105025 | 5.59 |
| MED12 | Mediator Complex Subunit 12 | Protein Coding | 44 | GC0XP071118 | 5.59 |
| RTN4 | Reticulon 4 | Protein Coding | 44 | GC02M054934 | 5.58 |
| MCM3 | Minichromosome Maintenance Complex Component 3 | Protein Coding | 45 | GC06M052264 | 5.57 |
| PLAG1 | PLAG1 Zinc Finger | Protein Coding | 40 | GC08M056161 | 5.57 |
| IL12A | Interleukin 12A | Protein Coding | 44 | GC03P159988 | 5.57 |
| SCNN1B | Sodium Channel Epithelial 1 Subunit Beta | Protein Coding | 48 | GC16P023278 | 5.56 |
| COL4A1 | Collagen Type IV Alpha 1 Chain | Protein Coding | 47 | GC13M110148 | 5.56 |
| GNG7 | G Protein Subunit Gamma 7 | Protein Coding | 40 | GC19M002511 | 5.56 |
| PREX2 | Phosphatidylinositol-3,4,5-Trisphosphate Dependent Rac Exchange Factor 2 | Protein Coding | 37 | GC08P067952 | 5.55 |
| XRCC4 | X-Ray Repair Cross Complementing 4 | Protein Coding | 43 | GC05P083077 | 5.55 |
| SNCA | Synuclein Alpha | Protein Coding | 50 | GC04M089724 | 5.55 |
| SMTN | Smoothelin | Protein Coding | 39 | GC22P031081 | 5.54 |
| CCNH | Cyclin H | Protein Coding | 45 | GC05M087311 | 5.54 |
| RAB27A | RAB27A, Member RAS Oncogene Family | Protein Coding | 48 | GC15M055202 | 5.52 |
| RBM10 | RNA Binding Motif Protein 10 | Protein Coding | 40 | GC0XP047162 | 5.52 |
| SOX10 | SRY-Box Transcription Factor 10 | Protein Coding | 45 | GC22M046233 | 5.52 |
| TRPM8 | Transient Receptor Potential Cation Channel Subfamily M Member 8 | Protein Coding | 43 | GC02P233917 | 5.52 |
| KLK7 | Kallikrein Related Peptidase 7 | Protein Coding | 40 | GC19M050977 | 5.51 |
| IFITM1 | Interferon Induced Transmembrane Protein 1 | Protein Coding | 41 | GC11P000313 | 5.51 |
| MIR218-1 | MicroRNA 218-1 | RNA Gene | 17 | GC04P020677 | 5.51 |
| AGER | Advanced Glycosylation End-Product Specific Receptor | Protein Coding | 44 | GC06M032180 | 5.51 |
| MIR181B2 | MicroRNA 181b-2 | RNA Gene | 19 | GC09P124693 | 5.51 |
| SLC19A1 | Solute Carrier Family 19 Member 1 | Protein Coding | 45 | GC21M045493 | 5.51 |
| RBL1 | RB Transcriptional Corepressor Like 1 | Protein Coding | 41 | GC20M036996 | 5.5 |
| FCGR2A | Fc Fragment Of IgG Receptor IIa | Protein Coding | 45 | GC01P161505 | 5.5 |
| COL7A1 | Collagen Type VII Alpha 1 Chain | Protein Coding | 44 | GC03M048564 | 5.5 |
| PRPS1 | Phosphoribosyl Pyrophosphate Synthetase 1 | Protein Coding | 46 | GC0XP107628 | 5.5 |
| LDLR | Low Density Lipoprotein Receptor | Protein Coding | 49 | GC19P011061 | 5.49 |
| ALDH1L1 | Aldehyde Dehydrogenase 1 Family Member L1 | Protein Coding | 40 | GC03M126103 | 5.49 |
| NID1 | Nidogen 1 | Protein Coding | 41 | GC01M235975 | 5.49 |
| CD59 | CD59 Molecule (CD59 Blood Group) | Protein Coding | 46 | GC11M033704 | 5.49 |
| NLRP3 | NLR Family Pyrin Domain Containing 3 | Protein Coding | 47 | GC01P247415 | 5.48 |
| CSNK1D | Casein Kinase 1 Delta | Protein Coding | 50 | GC17M082239 | 5.48 |
| ADAMTS18 | ADAM Metallopeptidase With Thrombospondin Type 1 Motif 18 | Protein Coding | 43 | GC16M077316 | 5.48 |
| HELLS | Helicase, Lymphoid Specific | Protein Coding | 45 | GC10P094501 | 5.48 |
| NSD1 | Nuclear Receptor Binding SET Domain Protein 1 | Protein Coding | 43 | GC05P177134 | 5.48 |
| PTN | Pleiotrophin | Protein Coding | 43 | GC07M137227 | 5.47 |
| RBBP4 | RB Binding Protein 4, Chromatin Remodeling Factor | Protein Coding | 43 | GC01P032651 | 5.47 |
| SMAD1 | SMAD Family Member 1 | Protein Coding | 44 | GC04P145481 | 5.47 |
| ENPP2 | Ectonucleotide Pyrophosphatase/Phosphodiesterase 2 | Protein Coding | 44 | GC08M119556 | 5.47 |
| HMBS | Hydroxymethylbilane Synthase | Protein Coding | 44 | GC11P119084 | 5.46 |
| HSPB2 | Heat Shock Protein Family B (Small) Member 2 | Protein Coding | 40 | GC11P111913 | 5.46 |
| FENDRR | FOXF1 Adjacent Non-Coding Developmental Regulatory RNA | RNA Gene | 17 | GC16M086511 | 5.46 |
| SCN3B | Sodium Voltage-Gated Channel Beta Subunit 3 | Protein Coding | 44 | GC11M123629 | 5.46 |
| SLC13A5 | Solute Carrier Family 13 Member 5 | Protein Coding | 42 | GC17M006684 | 5.45 |
| XAGE1A | X Antigen Family Member 1A | Protein Coding | 24 | GC0XP052496 | 5.44 |
| MIR138-1 | MicroRNA 138-1 | RNA Gene | 19 | GC03P044115 | 5.44 |
| CD109 | CD109 Molecule | Protein Coding | 39 | GC06P073695 | 5.44 |
| DDR1 | Discoidin Domain Receptor Tyrosine Kinase 1 | Protein Coding | 47 | GC06P047288 | 5.44 |
| WNT9B | Wnt Family Member 9B | Protein Coding | 41 | GC17P046833 | 5.43 |
| MYH11 | Myosin Heavy Chain 11 | Protein Coding | 45 | GC16M015704 | 5.42 |
| CBS | Cystathionine Beta-Synthase | Protein Coding | 48 | GC21M043053 | 5.42 |
| FGF9 | Fibroblast Growth Factor 9 | Protein Coding | 44 | GC13P021671 | 5.42 |
| HPC14 | Prostate Cancer, Hereditary, 14 | Genetic Locus | 2 | GC11U901301 | 5.42 |
| FAM3C | FAM3 Metabolism Regulating Signaling Molecule C | Protein Coding | 39 | GC07M121349 | 5.42 |
| GSTA1 | Glutathione S-Transferase Alpha 1 | Protein Coding | 41 | GC06M052791 | 5.41 |
| MAPK12 | Mitogen-Activated Protein Kinase 12 | Protein Coding | 48 | GC22M050246 | 5.41 |
| CPE | Carboxypeptidase E | Protein Coding | 44 | GC04P165361 | 5.41 |
| SLPI | Secretory Leukocyte Peptidase Inhibitor | Protein Coding | 39 | GC20M045252 | 5.41 |
| FOLR1 | Folate Receptor Alpha | Protein Coding | 47 | GC11P072190 | 5.41 |
| THBS4 | Thrombospondin 4 | Protein Coding | 43 | GC05P079991 | 5.41 |
| IFNGR2 | Interferon Gamma Receptor 2 | Protein Coding | 43 | GC21P033402 | 5.4 |
| CDC27 | Cell Division Cycle 27 | Protein Coding | 41 | GC17M047117 | 5.4 |
| DELEC1 | Deleted In Esophageal Cancer 1 | RNA Gene | 24 | GC09P114945 | 5.4 |
| MIR125B2 | MicroRNA 125b-2 | RNA Gene | 21 | GC21P016590 | 5.4 |
| PLCE1 | Phospholipase C Epsilon 1 | Protein Coding | 44 | GC10P093993 | 5.4 |
| CASC9 | Cancer Susceptibility 9 | RNA Gene | 14 | GC08M075132 | 5.4 |
| MYCL | MYCL Proto-Oncogene, BHLH Transcription Factor | Protein Coding | 37 | GC01M039895 | 5.4 |
| NCOA6 | Nuclear Receptor Coactivator 6 | Protein Coding | 39 | GC20M034696 | 5.39 |
| LPAR3 | Lysophosphatidic Acid Receptor 3 | Protein Coding | 43 | GC01M084811 | 5.39 |
| MIR663A | MicroRNA 663a | RNA Gene | 15 | GC20M026189 | 5.39 |
| EEF1A1 | Eukaryotic Translation Elongation Factor 1 Alpha 1 | Protein Coding | 43 | GC06M073515 | 5.39 |
| PPP2CA | Protein Phosphatase 2 Catalytic Subunit Alpha | Protein Coding | 48 | GC05M134194 | 5.39 |
| MIR485 | MicroRNA 485 | RNA Gene | 17 | GC14P104810 | 5.38 |
| MMP8 | Matrix Metallopeptidase 8 | Protein Coding | 47 | GC11M102617 | 5.38 |
| SPHK2 | Sphingosine Kinase 2 | Protein Coding | 43 | GC19P048619 | 5.38 |
| MCM7 | Minichromosome Maintenance Complex Component 7 | Protein Coding | 44 | GC07M100092 | 5.38 |
| MIR16-2 | MicroRNA 16-2 | RNA Gene | 18 | GC03P160413 | 5.38 |
| EXT2 | Exostosin Glycosyltransferase 2 | Protein Coding | 46 | GC11P044095 | 5.38 |
| FGF10 | Fibroblast Growth Factor 10 | Protein Coding | 47 | GC05M044340 | 5.37 |
| PODXL | Podocalyxin Like | Protein Coding | 41 | GC07M131500 | 5.36 |
| XAGE1B | X Antigen Family Member 1B | Protein Coding | 27 | GC0XM052513 | 5.36 |
| SEZ6L2 | Seizure Related 6 Homolog Like 2 | Protein Coding | 37 | GC16M029884 | 5.36 |
| CEP135 | Centrosomal Protein 135 | Protein Coding | 38 | GC04P055948 | 5.36 |
| CTNND2 | Catenin Delta 2 | Protein Coding | 41 | GC05M010971 | 5.35 |
| FUT2 | Fucosyltransferase 2 | Protein Coding | 44 | GC19P048695 | 5.35 |
| DNAJC21 | DnaJ Heat Shock Protein Family (Hsp40) Member C21 | Protein Coding | 35 | GC05P034929 | 5.34 |
| COL17A1 | Collagen Type XVII Alpha 1 Chain | Protein Coding | 43 | GC10M104031 | 5.33 |
| SPOP | Speckle Type BTB/POZ Protein | Protein Coding | 43 | GC17M049598 | 5.32 |
| ATF2 | Activating Transcription Factor 2 | Protein Coding | 45 | GC02M175072 | 5.32 |
| SUZ12 | SUZ12 Polycomb Repressive Complex 2 Subunit | Protein Coding | 41 | GC17P031937 | 5.31 |
| POU2AF1 | POU Class 2 Homeobox Associating Factor 1 | Protein Coding | 37 | GC11M111352 | 5.31 |
| RAG1 | Recombination Activating 1 | Protein Coding | 45 | GC11P036514 | 5.31 |
| VCP | Valosin Containing Protein | Protein Coding | 48 | GC09M035056 | 5.31 |
| BACH1 | BTB Domain And CNC Homolog 1 | Protein Coding | 41 | GC21P029194 | 5.3 |
| GUCY1A2 | Guanylate Cyclase 1 Soluble Subunit Alpha 2 | Protein Coding | 41 | GC11M106591 | 5.3 |
| CTSG | Cathepsin G | Protein Coding | 44 | GC14M024573 | 5.29 |
| SCGB2A2 | Secretoglobin Family 2A Member 2 | Protein Coding | 36 | GC11P062269 | 5.29 |
| ACVR1 | Activin A Receptor Type 1 | Protein Coding | 51 | GC02M157736 | 5.28 |
| LIF | LIF Interleukin 6 Family Cytokine | Protein Coding | 43 | GC22M030240 | 5.28 |
| LMO7 | LIM Domain 7 | Protein Coding | 40 | GC13P075620 | 5.28 |
| EIF2AK2 | Eukaryotic Translation Initiation Factor 2 Alpha Kinase 2 | Protein Coding | 45 | GC02M037099 | 5.28 |
| KNG1 | Kininogen 1 | Protein Coding | 44 | GC03P186717 | 5.27 |
| ANXA3 | Annexin A3 | Protein Coding | 42 | GC04P078551 | 5.27 |
| LAMA2 | Laminin Subunit Alpha 2 | Protein Coding | 43 | GC06P128863 | 5.27 |
| RNF182 | Ring Finger Protein 182 | Protein Coding | 35 | GC06P013924 | 5.27 |
| SKIV2L | Ski2 Like RNA Helicase | Protein Coding | 43 | GC06P047331 | 5.26 |
| POLG | DNA Polymerase Gamma, Catalytic Subunit | Protein Coding | 45 | GC15M089316 | 5.26 |
| BMP1 | Bone Morphogenetic Protein 1 | Protein Coding | 45 | GC08P022164 | 5.25 |
| LPL | Lipoprotein Lipase | Protein Coding | 49 | GC08P019901 | 5.25 |
| MIR7-1 | MicroRNA 7-1 | RNA Gene | 18 | GC09M084057 | 5.25 |
| MIEN1 | Migration And Invasion Enhancer 1 | Protein Coding | 33 | GC17M039728 | 5.25 |
| MIS12 | MIS12 Kinetochore Complex Component | Protein Coding | 35 | GC17P005486 | 5.24 |
| USF1 | Upstream Transcription Factor 1 | Protein Coding | 43 | GC01M161039 | 5.24 |
| ARRDC3 | Arrestin Domain Containing 3 | Protein Coding | 37 | GC05M091368 | 5.23 |
| FANCI | FA Complementation Group I | Protein Coding | 41 | GC15P089243 | 5.21 |
| BUB3 | BUB3 Mitotic Checkpoint Protein | Protein Coding | 47 | GC10P123154 | 5.21 |
| FSTL5 | Follistatin Like 5 | Protein Coding | 35 | GC04M161383 | 5.21 |
| TRAF2 | TNF Receptor Associated Factor 2 | Protein Coding | 44 | GC09P136881 | 5.2 |
| MAPT | Microtubule Associated Protein Tau | Protein Coding | 50 | GC17P045894 | 5.19 |
| TP73-AS1 | TP73 Antisense RNA 1 | RNA Gene | 22 | GC01M003735 | 5.19 |
| PRNP | Prion Protein | Protein Coding | 47 | GC20P004686 | 5.19 |
| RARS1 | Arginyl-TRNA Synthetase 1 | Protein Coding | 35 | GC05P168487 | 5.18 |
| OLFM4 | Olfactomedin 4 | Protein Coding | 37 | GC13P053028 | 5.18 |
| ARNT | Aryl Hydrocarbon Receptor Nuclear Translocator | Protein Coding | 43 | GC01M150809 | 5.18 |
| APEX2 | Apurinic/Apyrimidinic Endodeoxyribonuclease 2 | Protein Coding | 37 | GC0XP055000 | 5.17 |
| STC2 | Stanniocalcin 2 | Protein Coding | 40 | GC05M173314 | 5.17 |
| GFI1B | Growth Factor Independent 1B Transcriptional Repressor | Protein Coding | 40 | GC09P132945 | 5.17 |
| SCG2 | Secretogranin II | Protein Coding | 39 | GC02M223596 | 5.17 |
| ETS2 | ETS Proto-Oncogene 2, Transcription Factor | Protein Coding | 42 | GC21P038805 | 5.16 |
| SLCO2A1 | Solute Carrier Organic Anion Transporter Family Member 2A1 | Protein Coding | 43 | GC03M133932 | 5.16 |
| SNHG7 | Small Nucleolar RNA Host Gene 7 | RNA Gene | 20 | GC09M136721 | 5.16 |
| WWP2 | WW Domain Containing E3 Ubiquitin Protein Ligase 2 | Protein Coding | 43 | GC16P069796 | 5.15 |
| IDO1 | Indoleamine 2,3-Dioxygenase 1 | Protein Coding | 45 | GC08P039891 | 5.15 |
| CCNB3 | Cyclin B3 | Protein Coding | 36 | GC0XP050202 | 5.15 |
| ETFDH | Electron Transfer Flavoprotein Dehydrogenase | Protein Coding | 44 | GC04P158672 | 5.15 |
| MFAP5 | Microfibril Associated Protein 5 | Protein Coding | 41 | GC12M008637 | 5.15 |
| DEK | DEK Proto-Oncogene | Protein Coding | 40 | GC06M018224 | 5.15 |
| ATG16L1 | Autophagy Related 16 Like 1 | Protein Coding | 43 | GC02P233215 | 5.15 |
| PROX1 | Prospero Homeobox 1 | Protein Coding | 42 | GC01P213983 | 5.14 |
| CDO1 | Cysteine Dioxygenase Type 1 | Protein Coding | 42 | GC05M115804 | 5.14 |
| KAT2B | Lysine Acetyltransferase 2B | Protein Coding | 48 | GC03P020081 | 5.14 |
| LDB1 | LIM Domain Binding 1 | Protein Coding | 39 | GC10M102106 | 5.14 |
| ABI1 | Abl Interactor 1 | Protein Coding | 42 | GC10M026746 | 5.14 |
| MIR518A1 | MicroRNA 518a-1 | RNA Gene | 16 | GC19P054627 | 5.14 |
| HLA-DPB1 | Major Histocompatibility Complex, Class II, DP Beta 1 | Protein Coding | 43 | GC06P047346 | 5.13 |
| LINC00511 | Long Intergenic Non-Protein Coding RNA 511 | RNA Gene | 17 | GC17M072323 | 5.13 |
| IGF2BP2 | Insulin Like Growth Factor 2 MRNA Binding Protein 2 | Protein Coding | 44 | GC03M185643 | 5.13 |
| MYO1B | Myosin IB | Protein Coding | 37 | GC02P191246 | 5.13 |
| RIPK1 | Receptor Interacting Serine/Threonine Kinase 1 | Protein Coding | 49 | GC06P003064 | 5.12 |
| LPP | LIM Domain Containing Preferred Translocation Partner In Lipoma | Protein Coding | 42 | GC03P188153 | 5.12 |
| MS4A1 | Membrane Spanning 4-Domains A1 | Protein Coding | 46 | GC11P060474 | 5.12 |
| ARG1 | Arginase 1 | Protein Coding | 50 | GC06P131473 | 5.12 |
| KCNH2 | Potassium Voltage-Gated Channel Subfamily H Member 2 | Protein Coding | 49 | GC07M150944 | 5.11 |
| TRAF3 | TNF Receptor Associated Factor 3 | Protein Coding | 47 | GC14P104639 | 5.11 |
| NPAP1 | Nuclear Pore Associated Protein 1 | Protein Coding | 27 | GC15P024675 | 5.1 |
| CCNB2 | Cyclin B2 | Protein Coding | 44 | GC15P059105 | 5.1 |
| RAPH1 | Ras Association (RalGDS/AF-6) And Pleckstrin Homology Domains 1 | Protein Coding | 36 | GC02M203394 | 5.1 |
| MACROH2A1 | MacroH2A.1 Histone | Protein Coding | 35 | GC05M135334 | 5.09 |
| TTLL3 | Tubulin Tyrosine Ligase Like 3 | Protein Coding | 35 | GC03P009808 | 5.09 |
| INPPL1 | Inositol Polyphosphate Phosphatase Like 1 | Protein Coding | 49 | GC11P072223 | 5.09 |
| ANO1 | Anoctamin 1 | Protein Coding | 41 | GC11P069986 | 5.09 |
| CD276 | CD276 Molecule | Protein Coding | 40 | GC15P073683 | 5.08 |
| EFEMP1 | EGF Containing Fibulin Extracellular Matrix Protein 1 | Protein Coding | 44 | GC02M055865 | 5.08 |
| RPS27A | Ribosomal Protein S27a | Protein Coding | 43 | GC02P055231 | 5.08 |
| UNC5C | Unc-5 Netrin Receptor C | Protein Coding | 40 | GC04M095162 | 5.08 |
| FLG | Filaggrin | Protein Coding | 40 | GC01M152274 | 5.08 |
| SASH1 | SAM And SH3 Domain Containing 1 | Protein Coding | 39 | GC06P148212 | 5.07 |
| DDIAS | DNA Damage Induced Apoptosis Suppressor | Protein Coding | 31 | GC11P082899 | 5.07 |
| MCF2L2 | MCF.2 Cell Line Derived Transforming Sequence-Like 2 | Protein Coding | 34 | GC03M183183 | 5.07 |
| CD247 | CD247 Molecule | Protein Coding | 49 | GC01M167399 | 5.06 |
| MCAM | Melanoma Cell Adhesion Molecule | Protein Coding | 40 | GC11M119308 | 5.05 |
| ATP11C | ATPase Phospholipid Transporting 11C | Protein Coding | 36 | GC0XM139726 | 5.05 |
| HDGF | Heparin Binding Growth Factor | Protein Coding | 40 | GC01M156754 | 5.05 |
| USP7 | Ubiquitin Specific Peptidase 7 | Protein Coding | 47 | GC16M008892 | 5.05 |
| F13A1 | Coagulation Factor XIII A Chain | Protein Coding | 45 | GC06M006144 | 5.05 |
| SREBF2 | Sterol Regulatory Element Binding Transcription Factor 2 | Protein Coding | 43 | GC22P041833 | 5.05 |
| DCXR | Dicarbonyl And L-Xylulose Reductase | Protein Coding | 44 | GC17M082036 | 5.04 |
| GKN1 | Gastrokine 1 | Protein Coding | 38 | GC02P068974 | 5.04 |
| MIR17HG | MiR-17-92a-1 Cluster Host Gene | RNA Gene | 28 | GC13P091347 | 5.03 |
| KIAA0087 | KIAA0087 LncRNA | RNA Gene | 24 | GC07M026541 | 5.03 |
| XDH | Xanthine Dehydrogenase | Protein Coding | 47 | GC02M031294 | 5.03 |
| KNL1 | Kinetochore Scaffold 1 | Protein Coding | 33 | GC15P040595 | 5.02 |
| VANGL1 | VANGL Planar Cell Polarity Protein 1 | Protein Coding | 43 | GC01P115641 | 5.02 |
| RASAL1 | RAS Protein Activator Like 1 | Protein Coding | 39 | GC12M113098 | 5.02 |
| MIR657 | MicroRNA 657 | RNA Gene | 16 | GC17M081125 | 5.02 |
| TRIM25 | Tripartite Motif Containing 25 | Protein Coding | 44 | GC17M056836 | 5.02 |
| SIX4 | SIX Homeobox 4 | Protein Coding | 39 | GC14M060709 | 5.01 |
| ATF4 | Activating Transcription Factor 4 | Protein Coding | 46 | GC22P039525 | 5.01 |
| CGA | Glycoprotein Hormones, Alpha Polypeptide | Protein Coding | 43 | GC06M087085 | 5.01 |
| THY1 | Thy-1 Cell Surface Antigen | Protein Coding | 44 | GC11M119417 | 5.01 |
| BTC | Betacellulin | Protein Coding | 44 | GC04M074744 | 5 |
| HOPX | HOP Homeobox | Protein Coding | 37 | GC04M056647 | 5 |
| CCAR2 | Cell Cycle And Apoptosis Regulator 2 | Protein Coding | 36 | GC08P022604 | 5 |
| TUBA1A | Tubulin Alpha 1a | Protein Coding | 48 | GC12M049184 | 5 |
| CSNK1A1 | Casein Kinase 1 Alpha 1 | Protein Coding | 49 | GC05M149492 | 4.99 |
| KRT16 | Keratin 16 | Protein Coding | 44 | GC17M041609 | 4.99 |
| HOXB9 | Homeobox B9 | Protein Coding | 40 | GC17M048621 | 4.99 |
| CTSH | Cathepsin H | Protein Coding | 47 | GC15M078925 | 4.99 |
| ARHGEF2 | Rho/Rac Guanine Nucleotide Exchange Factor 2 | Protein Coding | 45 | GC01M155946 | 4.99 |
| CCK | Cholecystokinin | Protein Coding | 41 | GC03M042274 | 4.99 |
| DDX6 | DEAD-Box Helicase 6 | Protein Coding | 45 | GC11M118748 | 4.99 |
| F7 | Coagulation Factor VII | Protein Coding | 47 | GC13P113105 | 4.98 |
| CCAR1 | Cell Division Cycle And Apoptosis Regulator 1 | Protein Coding | 36 | GC10P068721 | 4.98 |
| HSPH1 | Heat Shock Protein Family H (Hsp110) Member 1 | Protein Coding | 43 | GC13M031134 | 4.98 |
| KLK8 | Kallikrein Related Peptidase 8 | Protein Coding | 41 | GC19M050996 | 4.98 |
| PRKCQ | Protein Kinase C Theta | Protein Coding | 49 | GC10M006393 | 4.98 |
| FERMT1 | Fermitin Family Member 1 | Protein Coding | 41 | GC20M006074 | 4.97 |
| TIE1 | Tyrosine Kinase With Immunoglobulin Like And EGF Like Domains 1 | Protein Coding | 43 | GC01P043300 | 4.97 |
| LYN | LYN Proto-Oncogene, Src Family Tyrosine Kinase | Protein Coding | 50 | GC08P055879 | 4.97 |
| HK3 | Hexokinase 3 | Protein Coding | 44 | GC05M176882 | 4.97 |
| DMRTA1 | DMRT Like Family A1 | Protein Coding | 36 | GC09P022436 | 4.97 |
| RALBP1 | RalA Binding Protein 1 | Protein Coding | 44 | GC18P009465 | 4.97 |
| WASF3 | WASP Family Member 3 | Protein Coding | 40 | GC13P026557 | 4.97 |
| ADCY2 | Adenylate Cyclase 2 | Protein Coding | 44 | GC05P007396 | 4.96 |
| HPS3 | HPS3 Biogenesis Of Lysosomal Organelles Complex 2 Subunit 1 | Protein Coding | 40 | GC03P149129 | 4.96 |
| PLCB4 | Phospholipase C Beta 4 | Protein Coding | 47 | GC20P009024 | 4.96 |
| GMNN | Geminin DNA Replication Inhibitor | Protein Coding | 44 | GC06P024779 | 4.96 |
| RACK1 | Receptor For Activated C Kinase 1 | Protein Coding | 37 | GC05M181310 | 4.96 |
| ABCB4 | ATP Binding Cassette Subfamily B Member 4 | Protein Coding | 45 | GC07M087401 | 4.96 |
| NDUFA13 | NADH:Ubiquinone Oxidoreductase Subunit A13 | Protein Coding | 44 | GC19P019515 | 4.96 |
| RELB | RELB Proto-Oncogene, NF-KB Subunit | Protein Coding | 45 | GC19P045002 | 4.95 |
| VPS13A | Vacuolar Protein Sorting 13 Homolog A | Protein Coding | 40 | GC09P077177 | 4.95 |
| ADARB2 | Adenosine Deaminase RNA Specific B2 (Inactive) | Protein Coding | 40 | GC10M001178 | 4.95 |
| HNRNPA2B1 | Heterogeneous Nuclear Ribonucleoprotein A2/B1 | Protein Coding | 45 | GC07M026174 | 4.95 |
| PEA15 | Proliferation And Apoptosis Adaptor Protein 15 | Protein Coding | 43 | GC01P160205 | 4.95 |
| ELK1 | ETS Transcription Factor ELK1 | Protein Coding | 44 | GC0XM047635 | 4.95 |
| GPT | Glutamic--Pyruvic Transaminase | Protein Coding | 41 | GC08P144502 | 4.95 |
| PRKAR1B | Protein Kinase CAMP-Dependent Type I Regulatory Subunit Beta | Protein Coding | 46 | GC07M000549 | 4.94 |
| TACC2 | Transforming Acidic Coiled-Coil Containing Protein 2 | Protein Coding | 37 | GC10P121989 | 4.94 |
| TFPI2 | Tissue Factor Pathway Inhibitor 2 | Protein Coding | 41 | GC07M093885 | 4.93 |
| RPL5 | Ribosomal Protein L5 | Protein Coding | 47 | GC01P092832 | 4.93 |
| MIR491 | MicroRNA 491 | RNA Gene | 18 | GC09P020716 | 4.92 |
| GBA | Glucosylceramidase Beta | Protein Coding | 47 | GC01M155234 | 4.92 |
| PRDM5 | PR/SET Domain 5 | Protein Coding | 39 | GC04M120686 | 4.92 |
| S100A14 | S100 Calcium Binding Protein A14 | Protein Coding | 37 | GC01M153614 | 4.92 |
| VWA2 | Von Willebrand Factor A Domain Containing 2 | Protein Coding | 35 | GC10P114239 | 4.92 |
| DAB2 | DAB Adaptor Protein 2 | Protein Coding | 43 | GC05M039371 | 4.92 |
| APOBEC3G | Apolipoprotein B MRNA Editing Enzyme Catalytic Subunit 3G | Protein Coding | 41 | GC22P039078 | 4.92 |
| CD55 | CD55 Molecule (Cromer Blood Group) | Protein Coding | 47 | GC01P207321 | 4.92 |
| IFNAR1 | Interferon Alpha And Beta Receptor Subunit 1 | Protein Coding | 45 | GC21P033324 | 4.92 |
| KCNQ5 | Potassium Voltage-Gated Channel Subfamily Q Member 5 | Protein Coding | 43 | GC06P072621 | 4.91 |
| F8 | Coagulation Factor VIII | Protein Coding | 45 | GC0XM154835 | 4.91 |
| CLSTN2 | Calsyntenin 2 | Protein Coding | 39 | GC03P139935 | 4.91 |
| LZTS2 | Leucine Zipper Tumor Suppressor 2 | Protein Coding | 35 | GC10P100996 | 4.9 |
| FZD9 | Frizzled Class Receptor 9 | Protein Coding | 44 | GC07P073433 | 4.9 |
| LDOC1 | LDOC1 Regulator Of NFKB Signaling | Protein Coding | 36 | GC0XM141111 | 4.9 |
| CR1 | Complement C3b/C4b Receptor 1 (Knops Blood Group) | Protein Coding | 44 | GC01P207496 | 4.9 |
| MYO18B | Myosin XVIIIB | Protein Coding | 38 | GC22P025742 | 4.89 |
| HK1 | Hexokinase 1 | Protein Coding | 51 | GC10P069269 | 4.89 |
| HRH1 | Histamine Receptor H1 | Protein Coding | 45 | GC03P011113 | 4.89 |
| SYK | Spleen Associated Tyrosine Kinase | Protein Coding | 50 | GC09P091171 | 4.89 |
| ENAH | ENAH Actin Regulator | Protein Coding | 41 | GC01M225486 | 4.89 |
| APOD | Apolipoprotein D | Protein Coding | 43 | GC03M195568 | 4.88 |
| KLK5 | Kallikrein Related Peptidase 5 | Protein Coding | 41 | GC19M050943 | 4.88 |
| CEP85L | Centrosomal Protein 85 Like | Protein Coding | 34 | GC06M118460 | 4.87 |
| JUND | JunD Proto-Oncogene, AP-1 Transcription Factor Subunit | Protein Coding | 41 | GC19M018279 | 4.87 |
| SGK3 | Serum/Glucocorticoid Regulated Kinase Family Member 3 | Protein Coding | 42 | GC08P066712 | 4.87 |
| CIITA | Class II Major Histocompatibility Complex Transactivator | Protein Coding | 45 | GC16P010879 | 4.86 |
| DNALI1 | Dynein Axonemal Light Intermediate Chain 1 | Protein Coding | 38 | GC01P037567 | 4.86 |
| CNTN4 | Contactin 4 | Protein Coding | 39 | GC03P002117 | 4.85 |
| FZR1 | Fizzy And Cell Division Cycle 20 Related 1 | Protein Coding | 42 | GC19P003506 | 4.85 |
| PKD1 | Polycystin 1, Transient Receptor Potential Channel Interacting | Protein Coding | 45 | GC16M002348 | 4.85 |
| GJB1 | Gap Junction Protein Beta 1 | Protein Coding | 47 | GC0XP071215 | 4.85 |
| TBX5 | T-Box Transcription Factor 5 | Protein Coding | 45 | GC12M114353 | 4.85 |
| CXADR | CXADR Ig-Like Cell Adhesion Molecule | Protein Coding | 43 | GC21P017512 | 4.85 |
| HUWE1 | HECT, UBA And WWE Domain Containing E3 Ubiquitin Protein Ligase 1 | Protein Coding | 44 | GC0XM053532 | 4.84 |
| FMR1 | FMRP Translational Regulator 1 | Protein Coding | 44 | GC0XP147913 | 4.84 |
| KCNQ1 | Potassium Voltage-Gated Channel Subfamily Q Member 1 | Protein Coding | 49 | GC11P002444 | 4.84 |
| CD52 | CD52 Molecule | Protein Coding | 36 | GC01P026317 | 4.84 |
| KALRN | Kalirin RhoGEF Kinase | Protein Coding | 41 | GC03P124033 | 4.84 |
| LPAR2 | Lysophosphatidic Acid Receptor 2 | Protein Coding | 44 | GC19M019624 | 4.84 |
| PRG2 | Proteoglycan 2, Pro Eosinophil Major Basic Protein | Protein Coding | 40 | GC11M057386 | 4.83 |
| RAD17 | RAD17 Checkpoint Clamp Loader Component | Protein Coding | 42 | GC05P069369 | 4.83 |
| S100A7 | S100 Calcium Binding Protein A7 | Protein Coding | 40 | GC01M153457 | 4.83 |
| PITX2 | Paired Like Homeodomain 2 | Protein Coding | 47 | GC04M110617 | 4.83 |
| PRRC2A | Proline Rich Coiled-Coil 2A | Protein Coding | 33 | GC06P047307 | 4.82 |
| TRAF4 | TNF Receptor Associated Factor 4 | Protein Coding | 43 | GC17P028771 | 4.82 |
| PRKAR2A | Protein Kinase CAMP-Dependent Type II Regulatory Subunit Alpha | Protein Coding | 46 | GC03M048744 | 4.82 |
| LFS3 | Li-Fraumeni Syndrome 3 | Genetic Locus | 2 | GC00U936829 | 4.82 |
| SPAG9 | Sperm Associated Antigen 9 | Protein Coding | 40 | GC17M050962 | 4.82 |
| SLC44A4 | Solute Carrier Family 44 Member 4 | Protein Coding | 41 | GC06M031863 | 4.82 |
| MIR498 | MicroRNA 498 | RNA Gene | 16 | GC19P054606 | 4.82 |
| ACAP1 | ArfGAP With Coiled-Coil, Ankyrin Repeat And PH Domains 1 | Protein Coding | 40 | GC17P007378 | 4.82 |
| ADAM17 | ADAM Metallopeptidase Domain 17 | Protein Coding | 51 | GC02M009488 | 4.81 |
| PLD1 | Phospholipase D1 | Protein Coding | 48 | GC03M171600 | 4.81 |
| RPS9 | Ribosomal Protein S9 | Protein Coding | 41 | GC19P055552 | 4.81 |
| F2RL3 | F2R Like Thrombin Or Trypsin Receptor 3 | Protein Coding | 45 | GC19P016888 | 4.81 |
| SEMA4F | Ssemaphorin 4F | Protein Coding | 37 | GC02P074654 | 4.81 |
| NPY | Neuropeptide Y | Protein Coding | 45 | GC07P024290 | 4.8 |
| FBP1 | Fructose-Bisphosphatase 1 | Protein Coding | 50 | GC09M094603 | 4.8 |
| RAN | RAN, Member RAS Oncogene Family | Protein Coding | 45 | GC12P130871 | 4.8 |
| PRKACG | Protein Kinase CAMP-Activated Catalytic Subunit Gamma | Protein Coding | 47 | GC09M069013 | 4.8 |
| MEIS1 | Meis Homeobox 1 | Protein Coding | 42 | GC02P066433 | 4.8 |
| CEP78 | Centrosomal Protein 78 | Protein Coding | 36 | GC09P078236 | 4.79 |
| PICALM | Phosphatidylinositol Binding Clathrin Assembly Protein | Protein Coding | 43 | GC11M085957 | 4.79 |
| KLF17 | Kruppel Like Factor 17 | Protein Coding | 38 | GC01P044048 | 4.79 |
| CASP6 | Caspase 6 | Protein Coding | 48 | GC04M109688 | 4.79 |
| SCAP | SREBF Chaperone | Protein Coding | 41 | GC03M047413 | 4.79 |
| PEG3 | Paternally Expressed 3 | Protein Coding | 38 | GC19M056810 | 4.79 |
| CALML4 | Calmodulin Like 4 | Protein Coding | 34 | GC15M068190 | 4.78 |
| DSCAML1 | DS Cell Adhesion Molecule Like 1 | Protein Coding | 39 | GC11M117427 | 4.78 |
| SREBF1 | Sterol Regulatory Element Binding Transcription Factor 1 | Protein Coding | 44 | GC17M017810 | 4.78 |
| SEMA3B | Semaphorin 3B | Protein Coding | 39 | GC03P050267 | 4.77 |
| BCL9L | BCL9 Like | Protein Coding | 35 | GC11M118893 | 4.77 |
| MMP10 | Matrix Metallopeptidase 10 | Protein Coding | 46 | GC11M102770 | 4.77 |
| ANAPC5 | Anaphase Promoting Complex Subunit 5 | Protein Coding | 38 | GC12M121308 | 4.77 |
| TAF15 | TATA-Box Binding Protein Associated Factor 15 | Protein Coding | 43 | GC17P035713 | 4.77 |
| MSN | Moesin | Protein Coding | 47 | GC0XP065588 | 4.77 |
| BCAS3 | BCAS3 Microtubule Associated Cell Migration Factor | Protein Coding | 36 | GC17P060678 | 4.77 |
| SPEN | Spen Family Transcriptional Repressor | Protein Coding | 38 | GC01P015848 | 4.76 |
| AKAP13 | A-Kinase Anchoring Protein 13 | Protein Coding | 44 | GC15P085381 | 4.76 |
| MBD2 | Methyl-CpG Binding Domain Protein 2 | Protein Coding | 40 | GC18M054151 | 4.76 |
| CD79A | CD79a Molecule | Protein Coding | 46 | GC19P041877 | 4.76 |
| MED19 | Mediator Complex Subunit 19 | Protein Coding | 33 | GC11M057703 | 4.76 |
| SCNN1G | Sodium Channel Epithelial 1 Subunit Gamma | Protein Coding | 46 | GC16P023182 | 4.75 |
| MFN2 | Mitofusin 2 | Protein Coding | 48 | GC01P011980 | 4.75 |
| NTSR1 | Neurotensin Receptor 1 | Protein Coding | 42 | GC20P062708 | 4.75 |
| ABCC4 | ATP Binding Cassette Subfamily C Member 4 | Protein Coding | 45 | GC13M095019 | 4.75 |
| AGK | Acylglycerol Kinase | Protein Coding | 41 | GC07P141551 | 4.75 |
| CDH10 | Cadherin 10 | Protein Coding | 39 | GC05M024522 | 4.75 |
| TSPO | Translocator Protein | Protein Coding | 43 | GC22P043151 | 4.75 |
| PLXNB1 | Plexin B1 | Protein Coding | 44 | GC03M048403 | 4.75 |
| NBR2 | Neighbor Of BRCA1 LncRNA 2 | RNA Gene | 25 | GC17P043125 | 4.75 |
| ECRG4 | ECRG4 Augurin Precursor | Protein Coding | 27 | GC02P106063 | 4.74 |
| CRX | Cone-Rod Homeobox | Protein Coding | 43 | GC19P047819 | 4.74 |
| CLDN2 | Claudin 2 | Protein Coding | 41 | GC0XP106900 | 4.73 |
| PTPRS | Protein Tyrosine Phosphatase Receptor Type S | Protein Coding | 43 | GC19M005157 | 4.73 |
| GNB4 | G Protein Subunit Beta 4 | Protein Coding | 43 | GC03M179397 | 4.73 |
| SACS | Sacsin Molecular Chaperone | Protein Coding | 36 | GC13M023328 | 4.73 |
| TNFRSF11A | TNF Receptor Superfamily Member 11a | Protein Coding | 45 | GC18P062325 | 4.72 |
| GNG12 | G Protein Subunit Gamma 12 | Protein Coding | 40 | GC01M067701 | 4.72 |
| SYNE2 | Spectrin Repeat Containing Nuclear Envelope Protein 2 | Protein Coding | 39 | GC14P063761 | 4.72 |
| MAD2L2 | Mitotic Arrest Deficient 2 Like 2 | Protein Coding | 44 | GC01M011674 | 4.72 |
| ASAP3 | ArfGAP With SH3 Domain, Ankyrin Repeat And PH Domain 3 | Protein Coding | 34 | GC01M023428 | 4.72 |
| ITGAL | Integrin Subunit Alpha L | Protein Coding | 45 | GC16P030472 | 4.72 |
| MIR216A | MicroRNA 216a | RNA Gene | 19 | GC02M055988 | 4.71 |
| SDF4 | Stromal Cell Derived Factor 4 | Protein Coding | 37 | GC01M001216 | 4.71 |
| PRKACB | Protein Kinase CAMP-Activated Catalytic Subunit Beta | Protein Coding | 47 | GC01P084078 | 4.71 |
| HOXA9 | Homeobox A9 | Protein Coding | 39 | GC07M027162 | 4.71 |
| PGPEP1 | Pyroglutamyl-Peptidase I | Protein Coding | 36 | GC19P023328 | 4.71 |
| MAP2K6 | Mitogen-Activated Protein Kinase Kinase 6 | Protein Coding | 47 | GC17P069414 | 4.71 |
| CD81 | CD81 Molecule | Protein Coding | 47 | GC11P002377 | 4.71 |
| ABCB11 | ATP Binding Cassette Subfamily B Member 11 | Protein Coding | 45 | GC02M168922 | 4.71 |
| AKAP6 | A-Kinase Anchoring Protein 6 | Protein Coding | 40 | GC14P032203 | 4.71 |
| KLK11 | Kallikrein Related Peptidase 11 | Protein Coding | 41 | GC19M051023 | 4.71 |
| MFF | Mitochondrial Fission Factor | Protein Coding | 37 | GC02P227325 | 4.7 |
| HDAC3 | Histone Deacetylase 3 | Protein Coding | 49 | GC05M141583 | 4.7 |
| CAPN10 | Calpain 10 | Protein Coding | 41 | GC02P240586 | 4.7 |
| CAPN9 | Calpain 9 | Protein Coding | 42 | GC01P230747 | 4.7 |
| MLLT10 | MLLT10 Histone Lysine Methyltransferase DOT1L Cofactor | Protein Coding | 41 | GC10P021524 | 4.7 |
| SHANK1 | SH3 And Multiple Ankyrin Repeat Domains 1 | Protein Coding | 37 | GC19M050659 | 4.7 |
| CENPC | Centromere Protein C | Protein Coding | 34 | GC04M067471 | 4.7 |
| CXCL5 | C-X-C Motif Chemokine Ligand 5 | Protein Coding | 40 | GC04M073995 | 4.7 |
| PIWIL4 | Piwi Like RNA-Mediated Gene Silencing 4 | Protein Coding | 37 | GC11P094543 | 4.7 |
| SSTR5 | Somatostatin Receptor 5 | Protein Coding | 41 | GC16P001072 | 4.69 |
| CUL5 | Cullin 5 | Protein Coding | 44 | GC11P108008 | 4.69 |
| DSP | Desmoplakin | Protein Coding | 49 | GC06P007541 | 4.69 |
| IGF2BP1 | Insulin Like Growth Factor 2 MRNA Binding Protein 1 | Protein Coding | 40 | GC17P048997 | 4.69 |
| LYPD3 | LY6/PLAUR Domain Containing 3 | Protein Coding | 36 | GC19M043460 | 4.69 |
| SH3TC1 | SH3 Domain And Tetratricopeptide Repeats 1 | Protein Coding | 32 | GC04P008183 | 4.69 |
| GNGT2 | G Protein Subunit Gamma Transducin 2 | Protein Coding | 40 | GC17M049202 | 4.69 |
| FHL2 | Four And A Half LIM Domains 2 | Protein Coding | 45 | GC02M105343 | 4.68 |
| ZNF385D | Zinc Finger Protein 385D | Protein Coding | 32 | GC03M021412 | 4.68 |
| CD63 | CD63 Molecule | Protein Coding | 41 | GC12M055725 | 4.68 |
| KLF9 | Kruppel Like Factor 9 | Protein Coding | 36 | GC09M070384 | 4.68 |
| BAG3 | BAG Cochaperone 3 | Protein Coding | 44 | GC10P119651 | 4.68 |
| ICAM5 | Intercellular Adhesion Molecule 5 | Protein Coding | 39 | GC19P010289 | 4.68 |
| CAPN6 | Calpain 6 | Protein Coding | 40 | GC0XM111245 | 4.68 |
| NUPR1 | Nuclear Protein 1, Transcriptional Regulator | Protein Coding | 35 | GC16M028548 | 4.68 |
| TNFSF13 | TNF Superfamily Member 13 | Protein Coding | 44 | GC17P007558 | 4.68 |
| GNB5 | G Protein Subunit Beta 5 | Protein Coding | 44 | GC15M060668 | 4.67 |
| ESRRG | Estrogen Related Receptor Gamma | Protein Coding | 45 | GC01M216503 | 4.67 |
| HIF1A-AS2 | HIF1A Antisense RNA 2 | RNA Gene | 16 | GC14M061715 | 4.67 |
| TUBB3 | Tubulin Beta 3 Class III | Protein Coding | 49 | GC16P089919 | 4.67 |
| CDC14A | Cell Division Cycle 14A | Protein Coding | 43 | GC01P100351 | 4.67 |
| CGB3 | Chorionic Gonadotropin Subunit Beta 3 | Protein Coding | 31 | GC19M049024 | 4.66 |
| RHOD | Ras Homolog Family Member D | Protein Coding | 39 | GC11P067057 | 4.66 |
| CDK5 | Cyclin Dependent Kinase 5 | Protein Coding | 52 | GC07M151053 | 4.66 |
| SMC3 | Structural Maintenance Of Chromosomes 3 | Protein Coding | 45 | GC10P110567 | 4.66 |
| CETP | Cholesteryl Ester Transfer Protein | Protein Coding | 46 | GC16P056961 | 4.66 |
| TCF12 | Transcription Factor 12 | Protein Coding | 47 | GC15P056918 | 4.66 |
| COL4A5 | Collagen Type IV Alpha 5 Chain | Protein Coding | 43 | GC0XP108439 | 4.66 |
| IL36A | Interleukin 36 Alpha | Protein Coding | 37 | GC02P113005 | 4.66 |
| MFN1 | Mitofusin 1 | Protein Coding | 41 | GC03P179347 | 4.65 |
| EIF2AK3 | Eukaryotic Translation Initiation Factor 2 Alpha Kinase 3 | Protein Coding | 48 | GC02M088637 | 4.65 |
| ZMYND8 | Zinc Finger MYND-Type Containing 8 | Protein Coding | 38 | GC20M047209 | 4.65 |
| MIR518D | MicroRNA 518d | RNA Gene | 13 | GC19P053734 | 4.65 |
| SCGB2A1 | Secretoglobin Family 2A Member 1 | Protein Coding | 34 | GC11P062227 | 4.64 |
| KRT73 | Keratin 73 | Protein Coding | 34 | GC12M052607 | 4.64 |
| ING3 | Inhibitor Of Growth Family Member 3 | Protein Coding | 39 | GC07P120950 | 4.64 |
| TFPI | Tissue Factor Pathway Inhibitor | Protein Coding | 44 | GC02M187464 | 4.64 |
| IMMT | Inner Membrane Mitochondrial Protein | Protein Coding | 39 | GC02M086144 | 4.64 |
| TRAF1 | TNF Receptor Associated Factor 1 | Protein Coding | 43 | GC09M120902 | 4.63 |
| ALOX15 | Arachidonate 15-Lipoxygenase | Protein Coding | 44 | GC17M004630 | 4.63 |
| ARID2 | AT-Rich Interaction Domain 2 | Protein Coding | 41 | GC12P045729 | 4.63 |
| HOXA5 | Homeobox A5 | Protein Coding | 41 | GC07M027142 | 4.63 |
| TNNI3K | TNNI3 Interacting Kinase | Protein Coding | 40 | GC01P074235 | 4.63 |
| RSPO1 | R-Spondin 1 | Protein Coding | 44 | GC01M037612 | 4.63 |
| TACSTD2 | Tumor Associated Calcium Signal Transducer 2 | Protein Coding | 43 | GC01M058575 | 4.63 |
| DPYSL2 | Dihydropyrimidinase Like 2 | Protein Coding | 45 | GC08P026514 | 4.62 |
| WASF2 | WASP Family Member 2 | Protein Coding | 43 | GC01M027404 | 4.62 |
| ERN1 | Endoplasmic Reticulum To Nucleus Signaling 1 | Protein Coding | 45 | GC17M064039 | 4.62 |
| IL17F | Interleukin 17F | Protein Coding | 41 | GC06M052209 | 4.62 |
| SNRNP200 | Small Nuclear Ribonucleoprotein U5 Subunit 200 | Protein Coding | 41 | GC02M096275 | 4.61 |
| TP53BP2 | Tumor Protein P53 Binding Protein 2 | Protein Coding | 42 | GC01M223779 | 4.61 |
| ANXA7 | Annexin A7 | Protein Coding | 42 | GC10M073375 | 4.61 |
| RRAGC | Ras Related GTP Binding C | Protein Coding | 41 | GC01M038844 | 4.61 |
| TAB1 | TGF-Beta Activated Kinase 1 (MAP3K7) Binding Protein 1 | Protein Coding | 42 | GC22P039401 | 4.61 |
| WWTR1 | WW Domain Containing Transcription Regulator 1 | Protein Coding | 41 | GC03M149517 | 4.61 |
| CD209 | CD209 Molecule | Protein Coding | 43 | GC19M007739 | 4.61 |
| CP | Ceruloplasmin | Protein Coding | 47 | GC03M149162 | 4.61 |
| SSTR1 | Somatostatin Receptor 1 | Protein Coding | 43 | GC14P038207 | 4.6 |
| CUL3 | Cullin 3 | Protein Coding | 46 | GC02M224470 | 4.6 |
| PAK6 | P21 (RAC1) Activated Kinase 6 | Protein Coding | 45 | GC15P040217 | 4.6 |
| DMTF1 | Cyclin D Binding Myb Like Transcription Factor 1 | Protein Coding | 36 | GC07P087155 | 4.6 |
| LPA | Lipoprotein(A) | Protein Coding | 41 | GC06M160531 | 4.6 |
| PIGR | Polymeric Immunoglobulin Receptor | Protein Coding | 41 | GC01M206928 | 4.59 |
| KCND3 | Potassium Voltage-Gated Channel Subfamily D Member 3 | Protein Coding | 46 | GC01M111770 | 4.59 |
| FEZF1 | FEZ Family Zinc Finger 1 | Protein Coding | 39 | GC07M122301 | 4.59 |
| OCIAD1 | OCIA Domain Containing 1 | Protein Coding | 35 | GC04P048805 | 4.59 |
| PRKCG | Protein Kinase C Gamma | Protein Coding | 51 | GC19P053879 | 4.59 |
| MIR154 | MicroRNA 154 | RNA Gene | 18 | GC14P104778 | 4.59 |
| CCL4 | C-C Motif Chemokine Ligand 4 | Protein Coding | 40 | GC17P036103 | 4.59 |
| ESM1 | Endothelial Cell Specific Molecule 1 | Protein Coding | 40 | GC05M054977 | 4.59 |
| MIR199A2 | MicroRNA 199a-2 | RNA Gene | 19 | GC01M172235 | 4.59 |
| TGFB1I1 | Transforming Growth Factor Beta 1 Induced Transcript 1 | Protein Coding | 41 | GC16P031578 | 4.59 |
| THBS2 | Thrombospondin 2 | Protein Coding | 45 | GC06M169215 | 4.58 |
| SLFN11 | Schlafen Family Member 11 | Protein Coding | 34 | GC17M035350 | 4.57 |
| LMTK3 | Lemur Tyrosine Kinase 3 | Protein Coding | 35 | GC19M048485 | 4.57 |
| COPS5 | COP9 Signalosome Subunit 5 | Protein Coding | 42 | GC08M067043 | 4.57 |
| LINC00339 | Long Intergenic Non-Protein Coding RNA 339 | RNA Gene | 18 | GC01P022056 | 4.57 |
| MIR218-2 | MicroRNA 218-2 | RNA Gene | 18 | GC05M168768 | 4.57 |
| TYK2 | Tyrosine Kinase 2 | Protein Coding | 52 | GC19M010350 | 4.57 |
| CXCL14 | C-X-C Motif Chemokine Ligand 14 | Protein Coding | 39 | GC05M135617 | 4.57 |
| CRKL | CRK Like Proto-Oncogene, Adaptor Protein | Protein Coding | 46 | GC22P020917 | 4.57 |
| DRD4 | Dopamine Receptor D4 | Protein Coding | 46 | GC11P000660 | 4.56 |
| F2RL1 | F2R Like Trypsin Receptor 1 | Protein Coding | 45 | GC05P076818 | 4.56 |
| CNTN1 | Contactin 1 | Protein Coding | 44 | GC12P040692 | 4.56 |
| ACHE | Acetylcholinesterase (Cartwright Blood Group) | Protein Coding | 45 | GC07M100889 | 4.56 |
| ACY1 | Aminoacylase 1 | Protein Coding | 46 | GC03P051983 | 4.56 |
| H1-0 | H1.0 Linker Histone | Protein Coding | 31 | GC22P037837 | 4.56 |
| LRP2 | LDL Receptor Related Protein 2 | Protein Coding | 45 | GC02M169127 | 4.56 |
| RASSF5 | Ras Association Domain Family Member 5 | Protein Coding | 40 | GC01P206507 | 4.56 |
| SATB1 | SATB Homeobox 1 | Protein Coding | 42 | GC03M018364 | 4.56 |
| CFI | Complement Factor I | Protein Coding | 46 | GC04M109740 | 4.56 |
| PCSK2 | Proprotein Convertase Subtilisin/Kexin Type 2 | Protein Coding | 41 | GC20P017226 | 4.56 |
| STRA6 | Signaling Receptor And Transporter Of Retinol STRA6 | Protein Coding | 40 | GC15M074179 | 4.56 |
| FILIP1L | Filamin A Interacting Protein 1 Like | Protein Coding | 35 | GC03M099830 | 4.55 |
| DRD2 | Dopamine Receptor D2 | Protein Coding | 50 | GC11M113409 | 4.55 |
| BCL2L2 | BCL2 Like 2 | Protein Coding | 44 | GC14P025306 | 4.55 |
| PIWIL1 | Piwi Like RNA-Mediated Gene Silencing 1 | Protein Coding | 41 | GC12P130337 | 4.55 |
| PDGFC | Platelet Derived Growth Factor C | Protein Coding | 43 | GC04M156760 | 4.55 |
| ACVR1B | Activin A Receptor Type 1B | Protein Coding | 47 | GC12P051951 | 4.54 |
| H3C1 | H3 Clustered Histone 1 | Protein Coding | 32 | GC06P026040 | 4.54 |
| HAMP | Hepcidin Antimicrobial Peptide | Protein Coding | 44 | GC19P038216 | 4.54 |
| TNFRSF4 | TNF Receptor Superfamily Member 4 | Protein Coding | 43 | GC01M001211 | 4.53 |
| AOC3 | Amine Oxidase Copper Containing 3 | Protein Coding | 44 | GC17P042851 | 4.53 |
| PRIMA1 | Proline Rich Membrane Anchor 1 | Protein Coding | 32 | GC14M093718 | 4.53 |
| PLA2G4A | Phospholipase A2 Group IVA | Protein Coding | 49 | GC01P186798 | 4.53 |
| MIR181D | MicroRNA 181d | RNA Gene | 17 | GC19P013874 | 4.52 |
| CSRNP3 | Cysteine And Serine Rich Nuclear Protein 3 | Protein Coding | 32 | GC02P165469 | 4.52 |
| IL32 | Interleukin 32 | Protein Coding | 40 | GC16P004242 | 4.52 |
| IL13RA2 | Interleukin 13 Receptor Subunit Alpha 2 | Protein Coding | 41 | GC0XM115003 | 4.52 |
| HNRNPA1 | Heterogeneous Nuclear Ribonucleoprotein A1 | Protein Coding | 45 | GC12P054280 | 4.52 |
| SLC6A2 | Solute Carrier Family 6 Member 2 | Protein Coding | 48 | GC16P055656 | 4.52 |
| MIR608 | MicroRNA 608 | RNA Gene | 17 | GC10P100974 | 4.52 |
| PRPF8 | Pre-MRNA Processing Factor 8 | Protein Coding | 41 | GC17M001650 | 4.51 |
| DNAH3 | Dynein Axonemal Heavy Chain 3 | Protein Coding | 34 | GC16M020944 | 4.51 |
| GRIK3 | Glutamate Ionotropic Receptor Kainate Type Subunit 3 | Protein Coding | 43 | GC01M036795 | 4.51 |
| SCN5A | Sodium Voltage-Gated Channel Alpha Subunit 5 | Protein Coding | 50 | GC03M038549 | 4.51 |
| CCDC6 | Coiled-Coil Domain Containing 6 | Protein Coding | 39 | GC10M059788 | 4.51 |
| PTPN14 | Protein Tyrosine Phosphatase Non-Receptor Type 14 | Protein Coding | 43 | GC01M214348 | 4.5 |
| EXOC4 | Exocyst Complex Component 4 | Protein Coding | 40 | GC07P133253 | 4.5 |
| TNN | Tenascin N | Protein Coding | 35 | GC01P175067 | 4.5 |
| PQBP1 | Polyglutamine Binding Protein 1 | Protein Coding | 40 | GC0XP048890 | 4.49 |
| NCL | Nucleolin | Protein Coding | 42 | GC02M231453 | 4.49 |
| RBP1 | Retinol Binding Protein 1 | Protein Coding | 39 | GC03M139517 | 4.49 |
| MIR584 | MicroRNA 584 | RNA Gene | 17 | GC05M149062 | 4.49 |
| CD2 | CD2 Molecule | Protein Coding | 44 | GC01P116754 | 4.49 |
| RBP4 | Retinol Binding Protein 4 | Protein Coding | 44 | GC10M093591 | 4.49 |
| ANK1 | Ankyrin 1 | Protein Coding | 43 | GC08M041653 | 4.49 |
| GSE1 | Gse1 Coiled-Coil Protein | Protein Coding | 34 | GC16P085171 | 4.49 |
| ADCY3 | Adenylate Cyclase 3 | Protein Coding | 47 | GC02M024819 | 4.48 |
| CD151 | CD151 Molecule (Raph Blood Group) | Protein Coding | 45 | GC11P000895 | 4.48 |
| TPM2 | Tropomyosin 2 | Protein Coding | 44 | GC09M035672 | 4.48 |
| ERGIC3 | ERGIC And Golgi 3 | Protein Coding | 36 | GC20P035542 | 4.48 |
| F9 | Coagulation Factor IX | Protein Coding | 46 | GC0XP139530 | 4.48 |
| SYT9 | Synaptotagmin 9 | Protein Coding | 36 | GC11P007238 | 4.48 |
| SAA1 | Serum Amyloid A1 | Protein Coding | 42 | GC11P018267 | 4.48 |
| DVL2 | Dishevelled Segment Polarity Protein 2 | Protein Coding | 45 | GC17M007225 | 4.48 |
| URGCP | Upregulator Of Cell Proliferation | Protein Coding | 34 | GC07M043876 | 4.47 |
| IRX5 | Iroquois Homeobox 5 | Protein Coding | 39 | GC16P054930 | 4.47 |
| MIR211 | MicroRNA 211 | RNA Gene | 18 | GC15M031065 | 4.47 |
| SAPCD2 | Suppressor APC Domain Containing 2 | Protein Coding | 31 | GC09M137062 | 4.47 |
| ATOH1 | Atonal BHLH Transcription Factor 1 | Protein Coding | 38 | GC04P093828 | 4.47 |
| SMPD1 | Sphingomyelin Phosphodiesterase 1 | Protein Coding | 47 | GC11P006390 | 4.47 |
| STK11IP | Serine/Threonine Kinase 11 Interacting Protein | Protein Coding | 35 | GC02P219597 | 4.46 |
| ACD | ACD Shelterin Complex Subunit And Telomerase Recruitment Factor | Protein Coding | 43 | GC16M067658 | 4.46 |
| PITX1 | Paired Like Homeodomain 1 | Protein Coding | 45 | GC05M135027 | 4.46 |
| LIMA1 | LIM Domain And Actin Binding 1 | Protein Coding | 38 | GC12M050175 | 4.46 |
| UHRF2 | Ubiquitin Like With PHD And Ring Finger Domains 2 | Protein Coding | 39 | GC09P006405 | 4.46 |
| PES1 | Pescadillo Ribosomal Biogenesis Factor 1 | Protein Coding | 38 | GC22M030576 | 4.45 |
| PRSS8 | Serine Protease 8 | Protein Coding | 43 | GC16M031132 | 4.45 |
| ADCY1 | Adenylate Cyclase 1 | Protein Coding | 48 | GC07P045580 | 4.45 |
| TIMP4 | TIMP Metallopeptidase Inhibitor 4 | Protein Coding | 40 | GC03M012153 | 4.45 |
| PLA2G10 | Phospholipase A2 Group X | Protein Coding | 44 | GC16M014672 | 4.45 |
| UTP20 | UTP20 Small Subunit Processome Component | Protein Coding | 31 | GC12P101280 | 4.45 |
| PPP1R1B | Protein Phosphatase 1 Regulatory Inhibitor Subunit 1B | Protein Coding | 43 | GC17P039626 | 4.45 |
| CCR1 | C-C Motif Chemokine Receptor 1 | Protein Coding | 45 | GC03M046218 | 4.45 |
| ACIN1 | Apoptotic Chromatin Condensation Inducer 1 | Protein Coding | 39 | GC14M023058 | 4.45 |
| GSTM2 | Glutathione S-Transferase Mu 2 | Protein Coding | 41 | GC01P109668 | 4.44 |
| MIRLET7A2 | MicroRNA Let-7a-2 | RNA Gene | 20 | GC11M122146 | 4.44 |
| PPP2R2A | Protein Phosphatase 2 Regulatory Subunit Balpha | Protein Coding | 44 | GC08P026292 | 4.44 |
| IREB2 | Iron Responsive Element Binding Protein 2 | Protein Coding | 43 | GC15P078437 | 4.44 |
| B4GALNT2 | Beta-1,4-N-Acetyl-Galactosaminyltransferase 2 | Protein Coding | 40 | GC17P049132 | 4.44 |
| MAPK8IP1 | Mitogen-Activated Protein Kinase 8 Interacting Protein 1 | Protein Coding | 45 | GC11P045988 | 4.44 |
| NCDN | Neurochondrin | Protein Coding | 35 | GC01P035557 | 4.44 |
| AVP | Arginine Vasopressin | Protein Coding | 45 | GC20M003082 | 4.44 |
| MSX1 | Msh Homeobox 1 | Protein Coding | 45 | GC04P004861 | 4.44 |
| TPTE2 | Transmembrane Phosphoinositide 3-Phosphatase And Tensin Homolog 2 | Protein Coding | 34 | GC13M019422 | 4.44 |
| EEF1A2 | Eukaryotic Translation Elongation Factor 1 Alpha 2 | Protein Coding | 45 | GC20M063488 | 4.43 |
| ADAMTS1 | ADAM Metallopeptidase With Thrombospondin Type 1 Motif 1 | Protein Coding | 44 | GC21M026835 | 4.43 |
| PMEL | Premelanosome Protein | Protein Coding | 37 | GC12M055954 | 4.43 |
| CYB5D2 | Cytochrome B5 Domain Containing 2 | Protein Coding | 33 | GC17P004143 | 4.43 |
| BMX | BMX Non-Receptor Tyrosine Kinase | Protein Coding | 44 | GC0XP015392 | 4.43 |
| KIF20B | Kinesin Family Member 20B | Protein Coding | 37 | GC10P089701 | 4.42 |
| PASD1 | PAS Domain Containing Repressor 1 | Protein Coding | 31 | GC0XP151563 | 4.42 |
| ARAP3 | ArfGAP With RhoGAP Domain, Ankyrin Repeat And PH Domain 3 | Protein Coding | 40 | GC05M141653 | 4.42 |
| LAMP2 | Lysosomal Associated Membrane Protein 2 | Protein Coding | 44 | GC0XM120426 | 4.42 |
| ADM | Adrenomedullin | Protein Coding | 44 | GC11P010304 | 4.41 |
| ITGB3BP | Integrin Subunit Beta 3 Binding Protein | Protein Coding | 41 | GC01M063440 | 4.41 |
| FOXQ1 | Forkhead Box Q1 | Protein Coding | 33 | GC06P001312 | 4.41 |
| MIR365A | MicroRNA 365a | RNA Gene | 17 | GC16P014309 | 4.41 |
| MATK | Megakaryocyte-Associated Tyrosine Kinase | Protein Coding | 45 | GC19M003777 | 4.41 |
| TAC1 | Tachykinin Precursor 1 | Protein Coding | 43 | GC07P097731 | 4.41 |
| SPTBN2 | Spectrin Beta, Non-Erythrocytic 2 | Protein Coding | 41 | GC11M066684 | 4.41 |
| NSD2 | Nuclear Receptor Binding SET Domain Protein 2 | Protein Coding | 35 | GC04P001872 | 4.4 |
| TBL1XR1 | TBL1X Receptor 1 | Protein Coding | 44 | GC03M177019 | 4.4 |
| GPRC5A | G Protein-Coupled Receptor Class C Group 5 Member A | Protein Coding | 41 | GC12P012890 | 4.4 |
| TRMT2A | TRNA Methyltransferase 2 Homolog A | Protein Coding | 38 | GC22M020099 | 4.4 |
| EDA | Ectodysplasin A | Protein Coding | 41 | GC0XP069618 | 4.39 |
| ADCY9 | Adenylate Cyclase 9 | Protein Coding | 44 | GC16M003953 | 4.39 |
| LRIG1 | Leucine Rich Repeats And Immunoglobulin Like Domains 1 | Protein Coding | 41 | GC03M066429 | 4.39 |
| IHH | Indian Hedgehog Signaling Molecule | Protein Coding | 47 | GC02M219054 | 4.39 |
| FMO3 | Flavin Containing Dimethylaniline Monoxygenase 3 | Protein Coding | 46 | GC01P171090 | 4.39 |
| HHIP | Hedgehog Interacting Protein | Protein Coding | 41 | GC04P144645 | 4.39 |
| PRDX2 | Peroxiredoxin 2 | Protein Coding | 46 | GC19M012796 | 4.39 |
| PSMC5 | Proteasome 26S Subunit, ATPase 5 | Protein Coding | 41 | GC17P063827 | 4.39 |
| PRDM1 | PR/SET Domain 1 | Protein Coding | 45 | GC06P105993 | 4.39 |
| NEK2 | NIMA Related Kinase 2 | Protein Coding | 50 | GC01M211658 | 4.38 |
| THBD | Thrombomodulin | Protein Coding | 44 | GC20M023026 | 4.38 |
| SLCO2B1 | Solute Carrier Organic Anion Transporter Family Member 2B1 | Protein Coding | 44 | GC11P075835 | 4.38 |
| TXNRD1 | Thioredoxin Reductase 1 | Protein Coding | 47 | GC12P104215 | 4.38 |
| CXCL9 | C-X-C Motif Chemokine Ligand 9 | Protein Coding | 39 | GC04M076001 | 4.38 |
| ADIPOR1 | Adiponectin Receptor 1 | Protein Coding | 44 | GC01M202940 | 4.37 |
| NPRL2 | NPR2 Like, GATOR1 Complex Subunit | Protein Coding | 39 | GC03M050380 | 4.37 |
| CYP2C19 | Cytochrome P450 Family 2 Subfamily C Member 19 | Protein Coding | 46 | GC10P094762 | 4.37 |
| PIAS3 | Protein Inhibitor Of Activated STAT 3 | Protein Coding | 41 | GC01M145848 | 4.37 |
| FOXO4 | Forkhead Box O4 | Protein Coding | 43 | GC0XP071095 | 4.37 |
| SOX11 | SRY-Box Transcription Factor 11 | Protein Coding | 41 | GC02P005703 | 4.37 |
| KIF7 | Kinesin Family Member 7 | Protein Coding | 39 | GC15M089608 | 4.37 |
| NCAPG | Non-SMC Condensin I Complex Subunit G | Protein Coding | 39 | GC04P017812 | 4.37 |
| IL10RA | Interleukin 10 Receptor Subunit Alpha | Protein Coding | 45 | GC11P117987 | 4.37 |
| MAP1LC3A | Microtubule Associated Protein 1 Light Chain 3 Alpha | Protein Coding | 43 | GC20P034546 | 4.36 |
| GLS | Glutaminase | Protein Coding | 46 | GC02P190880 | 4.36 |
| MICA | MHC Class I Polypeptide-Related Sequence A | Protein Coding | 39 | GC06P031399 | 4.36 |
| CDR1-AS | CDR1 Antisense RNA | RNA Gene | 6 | GC0XU902169 | 4.36 |
| PHIP | Pleckstrin Homology Domain Interacting Protein | Protein Coding | 39 | GC06M078934 | 4.36 |
| CNR1 | Cannabinoid Receptor 1 | Protein Coding | 46 | GC06M088139 | 4.36 |
| C8orf34 | Chromosome 8 Open Reading Frame 34 | Protein Coding | 32 | GC08P068330 | 4.36 |
| SERPINF1 | Serpin Family F Member 1 | Protein Coding | 44 | GC17P001761 | 4.35 |
| FER | FER Tyrosine Kinase | Protein Coding | 47 | GC05P108747 | 4.35 |
| MADD | MAP Kinase Activating Death Domain | Protein Coding | 40 | GC11P047290 | 4.35 |
| EXT1 | Exostosin Glycosyltransferase 1 | Protein Coding | 48 | GC08M117798 | 4.35 |
| HSD11B1 | Hydroxysteroid 11-Beta Dehydrogenase 1 | Protein Coding | 49 | GC01P209686 | 4.35 |
| GPR87 | G Protein-Coupled Receptor 87 | Protein Coding | 39 | GC03M151294 | 4.35 |
| CD38 | CD38 Molecule | Protein Coding | 45 | GC04P015779 | 4.35 |
| CCDC62 | Coiled-Coil Domain Containing 62 | Protein Coding | 33 | GC12P122863 | 4.35 |
| SH3GL1 | SH3 Domain Containing GRB2 Like 1, Endophilin A2 | Protein Coding | 43 | GC19M004360 | 4.34 |
| F10 | Coagulation Factor X | Protein Coding | 48 | GC13P113122 | 4.34 |
| PTPN22 | Protein Tyrosine Phosphatase Non-Receptor Type 22 | Protein Coding | 46 | GC01M113813 | 4.34 |
| CD14 | CD14 Molecule | Protein Coding | 44 | GC05M140631 | 4.34 |
| DRD3 | Dopamine Receptor D3 | Protein Coding | 44 | GC03M114128 | 4.34 |
| WNT8A | Wnt Family Member 8A | Protein Coding | 41 | GC05P138078 | 4.34 |
| PPP1R13L | Protein Phosphatase 1 Regulatory Subunit 13 Like | Protein Coding | 39 | GC19M045379 | 4.34 |
| EEF2K | Eukaryotic Elongation Factor 2 Kinase | Protein Coding | 47 | GC16P022217 | 4.33 |
| MIR637 | MicroRNA 637 | RNA Gene | 16 | GC19M003961 | 4.33 |
| NDRG2 | NDRG Family Member 2 | Protein Coding | 38 | GC14M021016 | 4.33 |
| UBD | Ubiquitin D | Protein Coding | 39 | GC06M029556 | 4.33 |
| GRK2 | G Protein-Coupled Receptor Kinase 2 | Protein Coding | 37 | GC11P067266 | 4.33 |
| MIR885 | MicroRNA 885 | RNA Gene | 17 | GC03M010413 | 4.33 |
| MIR409 | MicroRNA 409 | RNA Gene | 18 | GC14P104806 | 4.33 |
| SLC12A5 | Solute Carrier Family 12 Member 5 | Protein Coding | 46 | GC20P046021 | 4.33 |
| IGFBP6 | Insulin Like Growth Factor Binding Protein 6 | Protein Coding | 42 | GC12P053097 | 4.33 |
| SLC22A16 | Solute Carrier Family 22 Member 16 | Protein Coding | 37 | GC06M110424 | 4.33 |
| DNAJC27 | DnaJ Heat Shock Protein Family (Hsp40) Member C27 | Protein Coding | 37 | GC02M024943 | 4.32 |
| SLC22A9 | Solute Carrier Family 22 Member 9 | Protein Coding | 36 | GC11P063388 | 4.32 |
| C4A | Complement C4A (Rodgers Blood Group) | Protein Coding | 42 | GC06P047332 | 4.32 |
| KISS1R | KISS1 Receptor | Protein Coding | 44 | GC19P000917 | 4.32 |
| UVRAG | UV Radiation Resistance Associated | Protein Coding | 43 | GC11P075815 | 4.32 |
| MN1 | MN1 Proto-Oncogene, Transcriptional Regulator | Protein Coding | 41 | GC22M027748 | 4.32 |
| KIR3DL1 | Killer Cell Immunoglobulin Like Receptor, Three Ig Domains And Long Cytoplasmic Tail 1 | Protein Coding | 40 | GC19P055442 | 4.31 |
| KRT24 | Keratin 24 | Protein Coding | 36 | GC17M040697 | 4.31 |
| MLF2 | Myeloid Leukemia Factor 2 | Protein Coding | 35 | GC12M006750 | 4.3 |
| PPM1F | Protein Phosphatase, Mg2+/Mn2+ Dependent 1F | Protein Coding | 39 | GC22M021919 | 4.3 |
| OMA1 | OMA1 Zinc Metallopeptidase | Protein Coding | 37 | GC01M058415 | 4.3 |
| AMPD1 | Adenosine Monophosphate Deaminase 1 | Protein Coding | 45 | GC01M114673 | 4.3 |
| CUEDC2 | CUE Domain Containing 2 | Protein Coding | 38 | GC10M102424 | 4.3 |
| ATP2A2 | ATPase Sarcoplasmic/Endoplasmic Reticulum Ca2+ Transporting 2 | Protein Coding | 51 | GC12P110280 | 4.3 |
| UNC5B | Unc-5 Netrin Receptor B | Protein Coding | 37 | GC10P071212 | 4.29 |
| PNMT | Phenylethanolamine N-Methyltransferase | Protein Coding | 44 | GC17P039667 | 4.29 |
| HACE1 | HECT Domain And Ankyrin Repeat Containing E3 Ubiquitin Protein Ligase 1 | Protein Coding | 41 | GC06M104728 | 4.29 |
| EFS | Embryonal Fyn-Associated Substrate | Protein Coding | 35 | GC14M023356 | 4.29 |
| ZNF442 | Zinc Finger Protein 442 | Protein Coding | 29 | GC19M012350 | 4.29 |
| MICB | MHC Class I Polypeptide-Related Sequence B | Protein Coding | 41 | GC06P047300 | 4.29 |
| CX3CR1 | C-X3-C Motif Chemokine Receptor 1 | Protein Coding | 44 | GC03M039279 | 4.29 |
| DSC2 | Desmocollin 2 | Protein Coding | 45 | GC18M031058 | 4.29 |
| FOXL2 | Forkhead Box L2 | Protein Coding | 40 | GC03M138944 | 4.29 |
| PLEKHA8 | Pleckstrin Homology Domain Containing A8 | Protein Coding | 36 | GC07P030027 | 4.28 |
| EDRF1 | Erythroid Differentiation Regulatory Factor 1 | Protein Coding | 29 | GC10P125719 | 4.28 |
| AVPR2 | Arginine Vasopressin Receptor 2 | Protein Coding | 47 | GC0XP153902 | 4.28 |
| ID4 | Inhibitor Of DNA Binding 4, HLH Protein | Protein Coding | 39 | GC06P019837 | 4.28 |
| SCAI | Suppressor Of Cancer Cell Invasion | Protein Coding | 33 | GC09M124942 | 4.28 |
| IL10RB | Interleukin 10 Receptor Subunit Beta | Protein Coding | 44 | GC21P033266 | 4.28 |
| UICLM | Up-Regulated In Colorectal Cancer Liver Metastasis | RNA Gene | 9 | GC02M240955 | 4.27 |
| SPAG17 | Sperm Associated Antigen 17 | Protein Coding | 34 | GC01M117953 | 4.27 |
| FAH | Fumarylacetoacetate Hydrolase | Protein Coding | 47 | GC15P080152 | 4.27 |
| SRPX2 | Sushi Repeat Containing Protein X-Linked 2 | Protein Coding | 40 | GC0XP100648 | 4.27 |
| RASGRP1 | RAS Guanyl Releasing Protein 1 | Protein Coding | 46 | GC15M038488 | 4.27 |
| GJD4 | Gap Junction Protein Delta 4 | Protein Coding | 36 | GC10P035611 | 4.27 |
| ACTL9 | Actin Like 9 | Protein Coding | 31 | GC19M008669 | 4.27 |
| GNB2 | G Protein Subunit Beta 2 | Protein Coding | 42 | GC07P100673 | 4.27 |
| DIP2C | Disco Interacting Protein 2 Homolog C | Protein Coding | 34 | GC10M000274 | 4.27 |
| CSNK1A1L | Casein Kinase 1 Alpha 1 Like | Protein Coding | 36 | GC13M037103 | 4.26 |
| SPRY4 | Sprouty RTK Signaling Antagonist 4 | Protein Coding | 44 | GC05M142310 | 4.26 |
| FALEC | Focally Amplified Long Non-Coding RNA In Epithelial Cancer | RNA Gene | 14 | GC01P150515 | 4.26 |
| PSMD10 | Proteasome 26S Subunit, Non-ATPase 10 | Protein Coding | 40 | GC0XM108084 | 4.26 |
| IRF8 | Interferon Regulatory Factor 8 | Protein Coding | 45 | GC16P085898 | 4.26 |
| NOVA1 | NOVA Alternative Splicing Regulator 1 | Protein Coding | 39 | GC14M026443 | 4.26 |
| MIR363 | MicroRNA 363 | RNA Gene | 15 | GC0XM134205 | 4.25 |
| ODAM | Odontogenic, Ameloblast Associated | Protein Coding | 35 | GC04P070195 | 4.25 |
| SAFB | Scaffold Attachment Factor B | Protein Coding | 38 | GC19P005623 | 4.25 |
| PCDH11X | Protocadherin 11 X-Linked | Protein Coding | 35 | GC0XP091779 | 4.25 |
| CCL21 | C-C Motif Chemokine Ligand 21 | Protein Coding | 43 | GC09M034709 | 4.25 |
| PRSS50 | Serine Protease 50 | Protein Coding | 34 | GC03M046712 | 4.25 |
| TACC3 | Transforming Acidic Coiled-Coil Containing Protein 3 | Protein Coding | 43 | GC04P001723 | 4.25 |
| LETMD1 | LETM1 Domain Containing 1 | Protein Coding | 36 | GC12P051047 | 4.24 |
| TMPO | Thymopoietin | Protein Coding | 45 | GC12P098515 | 4.24 |
| PTPRR | Protein Tyrosine Phosphatase Receptor Type R | Protein Coding | 40 | GC12M070638 | 4.24 |
| MST1 | Macrophage Stimulating 1 | Protein Coding | 44 | GC03M049683 | 4.24 |
| TNFSF12 | TNF Superfamily Member 12 | Protein Coding | 40 | GC17P008027 | 4.24 |
| NLGN3 | Neuroligin 3 | Protein Coding | 43 | GC0XP071144 | 4.24 |
| MDC1 | Mediator Of DNA Damage Checkpoint 1 | Protein Coding | 40 | GC06M030896 | 4.23 |
| GACAT3 | Gastric Cancer Associated Transcript 3 | RNA Gene | 14 | GC02P016050 | 4.23 |
| UGDH | UDP-Glucose 6-Dehydrogenase | Protein Coding | 45 | GC04M039502 | 4.23 |
| PLAGL1 | PLAG1 Like Zinc Finger 1 | Protein Coding | 43 | GC06M143940 | 4.23 |
| NEU1 | Neuraminidase 1 | Protein Coding | 44 | GC06M031857 | 4.23 |
| MIRLET7F2 | MicroRNA Let-7f-2 | RNA Gene | 17 | GC0XM053583 | 4.23 |
| SLC1A7 | Solute Carrier Family 1 Member 7 | Protein Coding | 43 | GC01M053087 | 4.23 |
| RPS24 | Ribosomal Protein S24 | Protein Coding | 43 | GC10P078033 | 4.22 |
| CALD1 | Caldesmon 1 | Protein Coding | 42 | GC07P134744 | 4.22 |
| USP15 | Ubiquitin Specific Peptidase 15 | Protein Coding | 47 | GC12P062260 | 4.22 |
| KLF10 | Kruppel Like Factor 10 | Protein Coding | 42 | GC08M102648 | 4.22 |
| CALM1 | Calmodulin 1 | Protein Coding | 45 | GC14P090396 | 4.22 |
| MCM3AP | Minichromosome Maintenance Complex Component 3 Associated Protein | Protein Coding | 40 | GC21M046235 | 4.22 |
| UBC | Ubiquitin C | Protein Coding | 43 | GC12M124911 | 4.22 |
| DHRS2 | Dehydrogenase/Reductase 2 | Protein Coding | 39 | GC14P025289 | 4.22 |
| CDR2 | Cerebellar Degeneration Related Protein 2 | Protein Coding | 37 | GC16M022357 | 4.22 |
| TFF2 | Trefoil Factor 2 | Protein Coding | 41 | GC21M042346 | 4.22 |
| HAPLN1 | Hyaluronan And Proteoglycan Link Protein 1 | Protein Coding | 42 | GC05M083637 | 4.21 |
| SESN2 | Sestrin 2 | Protein Coding | 39 | GC01P028270 | 4.21 |
| GPI | Glucose-6-Phosphate Isomerase | Protein Coding | 46 | GC19P034359 | 4.21 |
| LIN28A | Lin-28 Homolog A | Protein Coding | 40 | GC01P026410 | 4.21 |
| ZNF703 | Zinc Finger Protein 703 | Protein Coding | 35 | GC08P037695 | 4.21 |
| BRF1 | BRF1 RNA Polymerase III Transcription Initiation Factor Subunit | Protein Coding | 40 | GC14M105212 | 4.2 |
| PCNX2 | Pecanex 2 | Protein Coding | 26 | GC01M232985 | 4.2 |
| INTS13 | Integrator Complex Subunit 13 | Protein Coding | 28 | GC12M026906 | 4.2 |
| GC | GC Vitamin D Binding Protein | Protein Coding | 43 | GC04M071741 | 4.2 |
| HSD11B2 | Hydroxysteroid 11-Beta Dehydrogenase 2 | Protein Coding | 45 | GC16P067433 | 4.2 |
| POLD3 | DNA Polymerase Delta 3, Accessory Subunit | Protein Coding | 40 | GC11P074526 | 4.19 |
| ACKR3 | Atypical Chemokine Receptor 3 | Protein Coding | 40 | GC02P236537 | 4.19 |
| MIR92B | MicroRNA 92b | RNA Gene | 16 | GC01P155195 | 4.19 |
| GSR | Glutathione-Disulfide Reductase | Protein Coding | 48 | GC08M030678 | 4.19 |
| GRIN2B | Glutamate Ionotropic Receptor NMDA Type Subunit 2B | Protein Coding | 50 | GC12M013437 | 4.19 |
| NTPCR | Nucleoside-Triphosphatase, Cancer-Related | Protein Coding | 37 | GC01P232950 | 4.19 |
| LEFTY2 | Left-Right Determination Factor 2 | Protein Coding | 43 | GC01M225937 | 4.19 |
| TACR1 | Tachykinin Receptor 1 | Protein Coding | 45 | GC02M075010 | 4.19 |
| SMC4 | Structural Maintenance Of Chromosomes 4 | Protein Coding | 39 | GC03P160399 | 4.19 |
| BIN1 | Bridging Integrator 1 | Protein Coding | 46 | GC02M127048 | 4.19 |
| BMPR1B | Bone Morphogenetic Protein Receptor Type 1B | Protein Coding | 50 | GC04P094757 | 4.18 |
| MALT1 | MALT1 Paracaspase | Protein Coding | 47 | GC18P058671 | 4.17 |
| PCLAF | PCNA Clamp Associated Factor | Protein Coding | 29 | GC15M064841 | 4.17 |
| NLGN4X | Neuroligin 4 X-Linked | Protein Coding | 40 | GC0XM005840 | 4.17 |
| ZNF471 | Zinc Finger Protein 471 | Protein Coding | 34 | GC19P056510 | 4.16 |
| SLC7A5 | Solute Carrier Family 7 Member 5 | Protein Coding | 44 | GC16M087830 | 4.16 |
| CUL2 | Cullin 2 | Protein Coding | 42 | GC10M035046 | 4.16 |
| CLIC1 | Chloride Intracellular Channel 1 | Protein Coding | 41 | GC06M032620 | 4.16 |
| HTRA1 | HtrA Serine Peptidase 1 | Protein Coding | 43 | GC10P122461 | 4.16 |
| EPHA1 | EPH Receptor A1 | Protein Coding | 47 | GC07M143390 | 4.16 |
| TRPV6 | Transient Receptor Potential Cation Channel Subfamily V Member 6 | Protein Coding | 46 | GC07M142871 | 4.16 |
| CCR4 | C-C Motif Chemokine Receptor 4 | Protein Coding | 45 | GC03P032951 | 4.15 |
| MYCBP2 | MYC Binding Protein 2 | Protein Coding | 39 | GC13M077044 | 4.15 |
| NELL1 | Neural EGFL Like 1 | Protein Coding | 39 | GC11P020647 | 4.15 |
| CACYBP | Calcyclin Binding Protein | Protein Coding | 39 | GC01P174968 | 4.15 |
| NDUFA1 | NADH:Ubiquinone Oxidoreductase Subunit A1 | Protein Coding | 44 | GC0XP119871 | 4.15 |
| MT-ND1 | Mitochondrially Encoded NADH:Ubiquinone Oxidoreductase Core Subunit 1 | Protein Coding | 32 | GCMTP003309 | 4.15 |
| RARG | Retinoic Acid Receptor Gamma | Protein Coding | 47 | GC12M053210 | 4.14 |
| NAGLU | N-Acetyl-Alpha-Glucosaminidase | Protein Coding | 43 | GC17P042535 | 4.14 |
| ABCA4 | ATP Binding Cassette Subfamily A Member 4 | Protein Coding | 44 | GC01M093992 | 4.14 |
| CD1A | CD1a Molecule | Protein Coding | 41 | GC01P158255 | 4.14 |
| LAMB1 | Laminin Subunit Beta 1 | Protein Coding | 47 | GC07M107923 | 4.14 |
| CABLES1 | Cdk5 And Abl Enzyme Substrate 1 | Protein Coding | 39 | GC18P023134 | 4.14 |
| TLE1 | TLE Family Member 1, Transcriptional Corepressor | Protein Coding | 44 | GC09M081583 | 4.14 |
| EPB41L3 | Erythrocyte Membrane Protein Band 4.1 Like 3 | Protein Coding | 41 | GC18M005382 | 4.14 |
| SLC11A1 | Solute Carrier Family 11 Member 1 | Protein Coding | 47 | GC02P218382 | 4.14 |
| JAKMIP1 | Janus Kinase And Microtubule Interacting Protein 1 | Protein Coding | 37 | GC04M006026 | 4.14 |
| PNP | Purine Nucleoside Phosphorylase | Protein Coding | 47 | GC14P020468 | 4.14 |
| ARFGEF2 | ADP Ribosylation Factor Guanine Nucleotide Exchange Factor 2 | Protein Coding | 41 | GC20P048921 | 4.13 |
| MPLKIP | M-Phase Specific PLK1 Interacting Protein | Protein Coding | 36 | GC07M040126 | 4.13 |
| STEAP3 | STEAP3 Metalloreductase | Protein Coding | 45 | GC02P119222 | 4.13 |
| LTF | Lactotransferrin | Protein Coding | 43 | GC03M046435 | 4.13 |
| ARMC5 | Armadillo Repeat Containing 5 | Protein Coding | 37 | GC16P031576 | 4.13 |
| HAT1 | Histone Acetyltransferase 1 | Protein Coding | 43 | GC02P171922 | 4.13 |
| MIR302C | MicroRNA 302c | RNA Gene | 19 | GC04M112680 | 4.12 |
| COL4A3 | Collagen Type IV Alpha 3 Chain | Protein Coding | 44 | GC02P227164 | 4.12 |
| EYA1 | EYA Transcriptional Coactivator And Phosphatase 1 | Protein Coding | 45 | GC08M071210 | 4.12 |
| UGT1A7 | UDP Glucuronosyltransferase Family 1 Member A7 | Protein Coding | 39 | GC02P233681 | 4.12 |
| HADHA | Hydroxyacyl-CoA Dehydrogenase Trifunctional Multienzyme Complex Subunit Alpha | Protein Coding | 45 | GC02M026190 | 4.12 |
| MIR326 | MicroRNA 326 | RNA Gene | 21 | GC11M075335 | 4.12 |
| GPX3 | Glutathione Peroxidase 3 | Protein Coding | 44 | GC05P150997 | 4.12 |
| FBN2 | Fibrillin 2 | Protein Coding | 41 | GC05M128257 | 4.12 |
| SDCBP2 | Syndecan Binding Protein 2 | Protein Coding | 39 | GC20M001309 | 4.11 |
| CST3 | Cystatin C | Protein Coding | 44 | GC20M023608 | 4.11 |
| LINC00312 | Long Intergenic Non-Protein Coding RNA 312 | RNA Gene | 20 | GC03P008571 | 4.11 |
| NR1H4 | Nuclear Receptor Subfamily 1 Group H Member 4 | Protein Coding | 48 | GC12P100473 | 4.11 |
| PRKAR2B | Protein Kinase CAMP-Dependent Type II Regulatory Subunit Beta | Protein Coding | 44 | GC07P107044 | 4.11 |
| MIR615 | MicroRNA 615 | RNA Gene | 20 | GC12P054033 | 4.1 |
| IL33 | Interleukin 33 | Protein Coding | 40 | GC09P006206 | 4.1 |
| GATA5 | GATA Binding Protein 5 | Protein Coding | 39 | GC20M062464 | 4.1 |
| ATP8B1 | ATPase Phospholipid Transporting 8B1 | Protein Coding | 40 | GC18M057646 | 4.1 |
| MIR506 | MicroRNA 506 | RNA Gene | 15 | GC0XM147230 | 4.1 |
| FTO | FTO Alpha-Ketoglutarate Dependent Dioxygenase | Protein Coding | 44 | GC16P053737 | 4.1 |
| LAMA1 | Laminin Subunit Alpha 1 | Protein Coding | 45 | GC18M006941 | 4.09 |
| FOXP2 | Forkhead Box P2 | Protein Coding | 43 | GC07P114086 | 4.09 |
| ITGA4 | Integrin Subunit Alpha 4 | Protein Coding | 48 | GC02P181456 | 4.09 |
| CSMD2 | CUB And Sushi Multiple Domains 2 | Protein Coding | 37 | GC01M033513 | 4.09 |
| XRRA1 | X-Ray Radiation Resistance Associated 1 | Protein Coding | 34 | GC11M074807 | 4.08 |
| NLRP8 | NLR Family Pyrin Domain Containing 8 | Protein Coding | 32 | GC19P055950 | 4.08 |
| DLG3 | Discs Large MAGUK Scaffold Protein 3 | Protein Coding | 41 | GC0XP070444 | 4.08 |
| ALOX15B | Arachidonate 15-Lipoxygenase Type B | Protein Coding | 41 | GC17P008039 | 4.08 |
| CCL1 | C-C Motif Chemokine Ligand 1 | Protein Coding | 38 | GC17M034402 | 4.08 |
| VCAN | Versican | Protein Coding | 47 | GC05P083471 | 4.08 |
| FBXO30 | F-Box Protein 30 | Protein Coding | 32 | GC06M145795 | 4.08 |
| TERF1 | Telomeric Repeat Binding Factor 1 | Protein Coding | 41 | GC08P073003 | 4.08 |
| MIR505 | MicroRNA 505 | RNA Gene | 16 | GC0XM139924 | 4.07 |
| H1-4 | H1.4 Linker Histone, Cluster Member | Protein Coding | 33 | GC06P028871 | 4.07 |
| NIPBL | NIPBL Cohesin Loading Factor | Protein Coding | 40 | GC05P036876 | 4.07 |
| DLL1 | Delta Like Canonical Notch Ligand 1 | Protein Coding | 45 | GC06M170282 | 4.07 |
| ITGB2 | Integrin Subunit Beta 2 | Protein Coding | 50 | GC21M044885 | 4.06 |
| UQCRC2 | Ubiquinol-Cytochrome C Reductase Core Protein 2 | Protein Coding | 46 | GC16P021963 | 4.06 |
| MIA2 | MIA SH3 Domain ER Export Factor 2 | Protein Coding | 37 | GC14P039230 | 4.06 |
| CHD5 | Chromodomain Helicase DNA Binding Protein 5 | Protein Coding | 40 | GC01M006103 | 4.06 |
| RCC2 | Regulator Of Chromosome Condensation 2 | Protein Coding | 39 | GC01M017406 | 4.06 |
| AKR1B1 | Aldo-Keto Reductase Family 1 Member B | Protein Coding | 47 | GC07M134442 | 4.06 |
| FAM215A | Family With Sequence Similarity 215 Member A | RNA Gene | 22 | GC17P043917 | 4.05 |
| DSTN | Destrin, Actin Depolymerizing Factor | Protein Coding | 39 | GC20P017550 | 4.05 |
| LOC110806263 | TERT 5' Regulatory Region | Biological Region | 1 | GC05P001294 | 4.05 |
| PENK | Proenkephalin | Protein Coding | 38 | GC08M056436 | 4.05 |
| RPL11 | Ribosomal Protein L11 | Protein Coding | 48 | GC01P023691 | 4.05 |
| MIR136 | MicroRNA 136 | RNA Gene | 19 | GC14P104582 | 4.05 |
| ATF6 | Activating Transcription Factor 6 | Protein Coding | 47 | GC01P161766 | 4.05 |
| TPI1 | Triosephosphate Isomerase 1 | Protein Coding | 48 | GC12P008208 | 4.05 |
| DLEU1 | Deleted In Lymphocytic Leukemia 1 | RNA Gene | 29 | GC13P050084 | 4.05 |
| REG1A | Regenerating Family Member 1 Alpha | Protein Coding | 41 | GC02P079120 | 4.05 |
| BANP | BTG3 Associated Nuclear Protein | Protein Coding | 37 | GC16P087949 | 4.05 |
| MIR187 | MicroRNA 187 | RNA Gene | 17 | GC18M035904 | 4.04 |
| CEP290 | Centrosomal Protein 290 | Protein Coding | 40 | GC12M088049 | 4.04 |
| HEY1 | Hes Related Family BHLH Transcription Factor With YRPW Motif 1 | Protein Coding | 43 | GC08M079764 | 4.04 |
| CHD4 | Chromodomain Helicase DNA Binding Protein 4 | Protein Coding | 44 | GC12M006570 | 4.04 |
| CLEC3B | C-Type Lectin Domain Family 3 Member B | Protein Coding | 40 | GC03P045357 | 4.04 |
| MMP19 | Matrix Metallopeptidase 19 | Protein Coding | 47 | GC12M055835 | 4.04 |
| RUFY3 | RUN And FYVE Domain Containing 3 | Protein Coding | 34 | GC04P070704 | 4.04 |
| PUS10 | Pseudouridine Synthase 10 | Protein Coding | 35 | GC02M060940 | 4.04 |
| CTNNA3 | Catenin Alpha 3 | Protein Coding | 39 | GC10M065912 | 4.03 |
| SRPK1 | SRSF Protein Kinase 1 | Protein Coding | 45 | GC06M042223 | 4.03 |
| PSMA2 | Proteasome 20S Subunit Alpha 2 | Protein Coding | 42 | GC07M042916 | 4.03 |
| RARRES1 | Retinoic Acid Receptor Responder 1 | Protein Coding | 40 | GC03M158696 | 4.02 |
| RPS5 | Ribosomal Protein S5 | Protein Coding | 41 | GC19P058386 | 4.02 |
| RRM2B | Ribonucleotide Reductase Regulatory TP53 Inducible Subunit M2B | Protein Coding | 49 | GC08M102204 | 4.02 |
| ZNF804A | Zinc Finger Protein 804A | Protein Coding | 34 | GC02P184598 | 4.02 |
| OSM | Oncostatin M | Protein Coding | 43 | GC22M030262 | 4.02 |
| UPK2 | Uroplakin 2 | Protein Coding | 37 | GC11P118925 | 4.02 |
| MSI1 | Musashi RNA Binding Protein 1 | Protein Coding | 39 | GC12M120341 | 4.02 |
| AFF1 | AF4/FMR2 Family Member 1 | Protein Coding | 38 | GC04P086934 | 4.02 |
| CREB5 | CAMP Responsive Element Binding Protein 5 | Protein Coding | 41 | GC07P028305 | 4.02 |
| LPIN1 | Lipin 1 | Protein Coding | 48 | GC02P011649 | 4.01 |
| KCNB2 | Potassium Voltage-Gated Channel Subfamily B Member 2 | Protein Coding | 41 | GC08P072532 | 4.01 |
| FCN2 | Ficolin 2 | Protein Coding | 40 | GC09P134864 | 4.01 |
| SLCO1A2 | Solute Carrier Organic Anion Transporter Family Member 1A2 | Protein Coding | 39 | GC12M021264 | 4.01 |
| ZBTB20 | Zinc Finger And BTB Domain Containing 20 | Protein Coding | 40 | GC03M114315 | 4.01 |
| PPP5C | Protein Phosphatase 5 Catalytic Subunit | Protein Coding | 44 | GC19P046346 | 4.01 |
| ADCY5 | Adenylate Cyclase 5 | Protein Coding | 48 | GC03M123282 | 4.01 |
| CPA4 | Carboxypeptidase A4 | Protein Coding | 41 | GC07P130293 | 4.01 |
| MIR103A2 | MicroRNA 103a-2 | RNA Gene | 18 | GC20P003917 | 4.01 |
| GPC4 | Glypican 4 | Protein Coding | 45 | GC0XM133300 | 4 |
| RAB38 | RAB38, Member RAS Oncogene Family | Protein Coding | 40 | GC11M087809 | 4 |
| CDK12 | Cyclin Dependent Kinase 12 | Protein Coding | 40 | GC17P039461 | 4 |
| GNG11 | G Protein Subunit Gamma 11 | Protein Coding | 39 | GC07P093921 | 4 |
| CDCA7 | Cell Division Cycle Associated 7 | Protein Coding | 42 | GC02P173354 | 4 |
| SLC22A3 | Solute Carrier Family 22 Member 3 | Protein Coding | 44 | GC06P160348 | 4 |
| MAP3K20 | Mitogen-Activated Protein Kinase Kinase Kinase 20 | Protein Coding | 39 | GC02P173076 | 4 |
| ID2 | Inhibitor Of DNA Binding 2 | Protein Coding | 44 | GC02P008772 | 4 |
| LIPC | Lipase C, Hepatic Type | Protein Coding | 44 | GC15P058410 | 4 |
| ELOA2 | Elongin A2 | Protein Coding | 25 | GC18M047050 | 3.99 |
| CTSC | Cathepsin C | Protein Coding | 45 | GC11M088211 | 3.99 |
| ADCY7 | Adenylate Cyclase 7 | Protein Coding | 45 | GC16P050363 | 3.99 |
| FOXK2 | Forkhead Box K2 | Protein Coding | 36 | GC17P082519 | 3.99 |
| ALPL | Alkaline Phosphatase, Biomineralization Associated | Protein Coding | 50 | GC01P021508 | 3.99 |
| PRDX3 | Peroxiredoxin 3 | Protein Coding | 43 | GC10M119167 | 3.99 |
| SKP1 | S-Phase Kinase Associated Protein 1 | Protein Coding | 43 | GC05M134148 | 3.99 |
| PTK7 | Protein Tyrosine Kinase 7 (Inactive) | Protein Coding | 43 | GC06P043076 | 3.99 |
| RPRM | Reprimo, TP53 Dependent G2 Arrest Mediator Homolog | Protein Coding | 33 | GC02M153477 | 3.99 |
| TERF2IP | TERF2 Interacting Protein | Protein Coding | 42 | GC16P075647 | 3.98 |
| MYOT | Myotilin | Protein Coding | 41 | GC05P137867 | 3.98 |
| PRDX5 | Peroxiredoxin 5 | Protein Coding | 46 | GC11P064317 | 3.98 |
| SNRPB2 | Small Nuclear Ribonucleoprotein Polypeptide B2 | Protein Coding | 37 | GC20P016730 | 3.97 |
| HSD3B2 | Hydroxy-Delta-5-Steroid Dehydrogenase, 3 Beta- And Steroid Delta-Isomerase 2 | Protein Coding | 46 | GC01P119414 | 3.97 |
| SAR1A | Secretion Associated Ras Related GTPase 1A | Protein Coding | 41 | GC10M070147 | 3.97 |
| PTPN6 | Protein Tyrosine Phosphatase Non-Receptor Type 6 | Protein Coding | 50 | GC12P008223 | 3.97 |
| USP33 | Ubiquitin Specific Peptidase 33 | Protein Coding | 39 | GC01M077695 | 3.97 |
| AGAP2 | ArfGAP With GTPase Domain, Ankyrin Repeat And PH Domain 2 | Protein Coding | 41 | GC12M057723 | 3.97 |
| MIR219A1 | MicroRNA 219a-1 | RNA Gene | 19 | GC06P033207 | 3.96 |
| RNF146 | Ring Finger Protein 146 | Protein Coding | 37 | GC06P127266 | 3.96 |
| MGST1 | Microsomal Glutathione S-Transferase 1 | Protein Coding | 43 | GC12P016347 | 3.96 |
| GEN1 | GEN1 Holliday Junction 5' Flap Endonuclease | Protein Coding | 39 | GC02P017710 | 3.96 |
| KRTAP10-8 | Keratin Associated Protein 10-8 | Protein Coding | 28 | GC21P044612 | 3.96 |
| SERPINH1 | Serpin Family H Member 1 | Protein Coding | 45 | GC11P075562 | 3.95 |
| CRYAA | Crystallin Alpha A | Protein Coding | 44 | GC21P043169 | 3.95 |
| FNIP1 | Folliculin Interacting Protein 1 | Protein Coding | 36 | GC05M131641 | 3.95 |
| SLC33A1 | Solute Carrier Family 33 Member 1 | Protein Coding | 43 | GC03M155821 | 3.95 |
| RPS6KA2 | Ribosomal Protein S6 Kinase A2 | Protein Coding | 46 | GC06M166409 | 3.95 |
| MB | Myoglobin | Protein Coding | 43 | GC22M035606 | 3.95 |
| MIR382 | MicroRNA 382 | RNA Gene | 15 | GC14P104799 | 3.95 |
| HSPA9 | Heat Shock Protein Family A (Hsp70) Member 9 | Protein Coding | 47 | GC05M138554 | 3.95 |
| LTBP4 | Latent Transforming Growth Factor Beta Binding Protein 4 | Protein Coding | 40 | GC19P040592 | 3.94 |
| GLB1 | Galactosidase Beta 1 | Protein Coding | 48 | GC03M033013 | 3.94 |
| TFEC | Transcription Factor EC | Protein Coding | 39 | GC07M115935 | 3.94 |
| USP8 | Ubiquitin Specific Peptidase 8 | Protein Coding | 48 | GC15P050424 | 3.94 |
| UGT2B15 | UDP Glucuronosyltransferase Family 2 Member B15 | Protein Coding | 42 | GC04M068646 | 3.94 |
| SMARCAL1 | SWI/SNF Related, Matrix Associated, Actin Dependent Regulator Of Chromatin, Subfamily A Like 1 | Protein Coding | 43 | GC02P216412 | 3.94 |
| GNG5 | G Protein Subunit Gamma 5 | Protein Coding | 40 | GC01M084498 | 3.94 |
| ADCY6 | Adenylate Cyclase 6 | Protein Coding | 47 | GC12M048766 | 3.93 |
| EHMT2 | Euchromatic Histone Lysine Methyltransferase 2 | Protein Coding | 45 | GC06M031879 | 3.93 |
| UBE2I | Ubiquitin Conjugating Enzyme E2 I | Protein Coding | 48 | GC16P001415 | 3.93 |
| NR4A1 | Nuclear Receptor Subfamily 4 Group A Member 1 | Protein Coding | 46 | GC12P052022 | 3.93 |
| PCCA | Propionyl-CoA Carboxylase Subunit Alpha | Protein Coding | 45 | GC13P100089 | 3.92 |
| CYREN | Cell Cycle Regulator Of NHEJ | Protein Coding | 25 | GC07M135100 | 3.92 |
| GRID2 | Glutamate Ionotropic Receptor Delta Type Subunit 2 | Protein Coding | 44 | GC04P092304 | 3.92 |
| SCRT1 | Scratch Family Transcriptional Repressor 1 | Protein Coding | 33 | GC08M144330 | 3.92 |
| CRH | Corticotropin Releasing Hormone | Protein Coding | 44 | GC08M066176 | 3.91 |
| REV1 | REV1 DNA Directed Polymerase | Protein Coding | 41 | GC02M099383 | 3.91 |
| LITAF | Lipopolysaccharide Induced TNF Factor | Protein Coding | 44 | GC16M011547 | 3.91 |
| MAOA | Monoamine Oxidase A | Protein Coding | 50 | GC0XP043654 | 3.91 |
| AQP1 | Aquaporin 1 (Colton Blood Group) | Protein Coding | 45 | GC07P030911 | 3.9 |
| MAPKAPK3 | MAPK Activated Protein Kinase 3 | Protein Coding | 49 | GC03P050648 | 3.9 |
| HR | HR Lysine Demethylase And Nuclear Receptor Corepressor | Protein Coding | 42 | GC08M022114 | 3.9 |
| MIR628 | MicroRNA 628 | RNA Gene | 17 | GC15M055372 | 3.89 |
| PF4 | Platelet Factor 4 | Protein Coding | 41 | GC04M073980 | 3.89 |
| UPK3A | Uroplakin 3A | Protein Coding | 37 | GC22P045284 | 3.89 |
| TMEM97 | Transmembrane Protein 97 | Protein Coding | 35 | GC17P028319 | 3.89 |
| PLS3 | Plastin 3 | Protein Coding | 41 | GC0XP115560 | 3.89 |
| CHD1 | Chromodomain Helicase DNA Binding Protein 1 | Protein Coding | 45 | GC05M098853 | 3.88 |
| HSD3B1 | Hydroxy-Delta-5-Steroid Dehydrogenase, 3 Beta- And Steroid Delta-Isomerase 1 | Protein Coding | 43 | GC01P119507 | 3.88 |
| FERD3L | Fer3 Like BHLH Transcription Factor | Protein Coding | 33 | GC07M019184 | 3.88 |
| CENPH | Centromere Protein H | Protein Coding | 34 | GC05P069189 | 3.88 |
| ST8SIA4 | ST8 Alpha-N-Acetyl-Neuraminide Alpha-2,8-Sialyltransferase 4 | Protein Coding | 40 | GC05M100806 | 3.88 |
| ST3GAL6 | ST3 Beta-Galactoside Alpha-2,3-Sialyltransferase 6 | Protein Coding | 41 | GC03P098732 | 3.88 |
| ITIH4 | Inter-Alpha-Trypsin Inhibitor Heavy Chain 4 | Protein Coding | 42 | GC03M052812 | 3.88 |
| MAF | MAF BZIP Transcription Factor | Protein Coding | 45 | GC16M079204 | 3.88 |
| TLCD3A | TLC Domain Containing 3A | Protein Coding | 25 | GC17P000733 | 3.88 |
| RBBP6 | RB Binding Protein 6, Ubiquitin Ligase | Protein Coding | 39 | GC16P024537 | 3.88 |
| SHMT1 | Serine Hydroxymethyltransferase 1 | Protein Coding | 45 | GC17M019857 | 3.88 |
| SLC26A10 | Solute Carrier Family 26 Member 10 | Pseudogene | 33 | GC12P057619 | 3.88 |
| MAP3K2 | Mitogen-Activated Protein Kinase Kinase Kinase 2 | Protein Coding | 44 | GC02M127298 | 3.88 |
| S100A1 | S100 Calcium Binding Protein A1 | Protein Coding | 41 | GC01P153627 | 3.88 |
| CPOX | Coproporphyrinogen Oxidase | Protein Coding | 43 | GC03M098576 | 3.88 |
| FABP1 | Fatty Acid Binding Protein 1 | Protein Coding | 43 | GC02M088122 | 3.88 |
| OVGP1 | Oviductal Glycoprotein 1 | Protein Coding | 40 | GC01M111414 | 3.88 |
| WARS1 | Tryptophanyl-TRNA Synthetase 1 | Protein Coding | 37 | GC14M100334 | 3.87 |
| VCL | Vinculin | Protein Coding | 47 | GC10P073995 | 3.87 |
| MIR411 | MicroRNA 411 | RNA Gene | 14 | GC14P104808 | 3.87 |
| ZNF155 | Zinc Finger Protein 155 | Protein Coding | 33 | GC19P043967 | 3.87 |
| IQGAP3 | IQ Motif Containing GTPase Activating Protein 3 | Protein Coding | 40 | GC01M156525 | 3.87 |
| GNGT1 | G Protein Subunit Gamma Transducin 1 | Protein Coding | 43 | GC07P093591 | 3.87 |
| RPL18 | Ribosomal Protein L18 | Protein Coding | 43 | GC19M048615 | 3.87 |
| TBXT | T-Box Transcription Factor T | Protein Coding | 32 | GC06M166158 | 3.86 |
| NEDD9 | Neural Precursor Cell Expressed, Developmentally Down-Regulated 9 | Protein Coding | 42 | GC06M011183 | 3.86 |
| E2F5 | E2F Transcription Factor 5 | Protein Coding | 40 | GC08P085177 | 3.86 |
| LAMA4 | Laminin Subunit Alpha 4 | Protein Coding | 44 | GC06M112107 | 3.86 |
| ALX4 | ALX Homeobox 4 | Protein Coding | 39 | GC11M044238 | 3.86 |
| PPP1R3C | Protein Phosphatase 1 Regulatory Subunit 3C | Protein Coding | 39 | GC10M091628 | 3.86 |
| GABRA6 | Gamma-Aminobutyric Acid Type A Receptor Subunit Alpha6 | Protein Coding | 44 | GC05P161547 | 3.85 |
| EFNB3 | Ephrin B3 | Protein Coding | 42 | GC17P008051 | 3.85 |
| TET1 | Tet Methylcytosine Dioxygenase 1 | Protein Coding | 38 | GC10P068560 | 3.85 |
| ADGRE5 | Adhesion G Protein-Coupled Receptor E5 | Protein Coding | 38 | GC19P014381 | 3.85 |
| CCM2 | CCM2 Scaffold Protein | Protein Coding | 42 | GC07P044999 | 3.85 |
| RANBP2 | RAN Binding Protein 2 | Protein Coding | 45 | GC02P108719 | 3.85 |
| BRINP3 | BMP/Retinoic Acid Inducible Neural Specific 3 | Protein Coding | 28 | GC01M190067 | 3.85 |
| LACTB | Lactamase Beta | Protein Coding | 36 | GC15P073008 | 3.84 |
| PORCN | Porcupine O-Acyltransferase | Protein Coding | 40 | GC0XP048513 | 3.84 |
| TRIM37 | Tripartite Motif Containing 37 | Protein Coding | 42 | GC17M058982 | 3.84 |
| ADCY4 | Adenylate Cyclase 4 | Protein Coding | 42 | GC14M024318 | 3.84 |
| TMPRSS6 | Transmembrane Serine Protease 6 | Protein Coding | 44 | GC22M037066 | 3.84 |
| PDCD1LG2 | Programmed Cell Death 1 Ligand 2 | Protein Coding | 41 | GC09P005510 | 3.84 |
| CACNB1 | Calcium Voltage-Gated Channel Auxiliary Subunit Beta 1 | Protein Coding | 42 | GC17M039173 | 3.84 |
| MX1 | MX Dynamin Like GTPase 1 | Protein Coding | 41 | GC21P041420 | 3.83 |
| TPM4 | Tropomyosin 4 | Protein Coding | 40 | GC19P023264 | 3.83 |
| PMP22 | Peripheral Myelin Protein 22 | Protein Coding | 40 | GC17M015229 | 3.83 |
| BATF2 | Basic Leucine Zipper ATF-Like Transcription Factor 2 | Protein Coding | 34 | GC11M064987 | 3.83 |
| TERF2 | Telomeric Repeat Binding Factor 2 | Protein Coding | 40 | GC16M069355 | 3.83 |
| PZP | PZP Alpha-2-Macroglobulin Like | Protein Coding | 39 | GC12M009148 | 3.82 |
| IFNG-AS1 | IFNG Antisense RNA 1 | RNA Gene | 16 | GC12P067989 | 3.82 |
| H1-5 | H1.5 Linker Histone, Cluster Member | Protein Coding | 32 | GC06M028364 | 3.82 |
| SRSF3 | Serine And Arginine Rich Splicing Factor 3 | Protein Coding | 40 | GC06P047457 | 3.82 |
| KIF11 | Kinesin Family Member 11 | Protein Coding | 47 | GC10P092593 | 3.82 |
| MIR873 | MicroRNA 873 | RNA Gene | 16 | GC09M028880 | 3.82 |
| DPM1 | Dolichyl-Phosphate Mannosyltransferase Subunit 1, Catalytic | Protein Coding | 44 | GC20M050934 | 3.82 |
| PDZD2 | PDZ Domain Containing 2 | Protein Coding | 37 | GC05P031639 | 3.82 |
| EPHB1 | EPH Receptor B1 | Protein Coding | 47 | GC03P134598 | 3.82 |
| TPH2 | Tryptophan Hydroxylase 2 | Protein Coding | 48 | GC12P071938 | 3.82 |
| TPSAB1 | Tryptase Alpha/Beta 1 | Protein Coding | 43 | GC16P001240 | 3.82 |
| CINP | Cyclin Dependent Kinase 2 Interacting Protein | Protein Coding | 35 | GC14M102342 | 3.82 |
| HIC2 | HIC ZBTB Transcriptional Repressor 2 | Protein Coding | 35 | GC22P024209 | 3.82 |
| IST1 | IST1 Factor Associated With ESCRT-III | Protein Coding | 37 | GC16P071846 | 3.81 |
| UBR5 | Ubiquitin Protein Ligase E3 Component N-Recognin 5 | Protein Coding | 42 | GC08M102252 | 3.81 |
| CYP27A1 | Cytochrome P450 Family 27 Subfamily A Member 1 | Protein Coding | 47 | GC02P218781 | 3.81 |
| GPR101 | G Protein-Coupled Receptor 101 | Protein Coding | 39 | GC0XM137030 | 3.81 |
| SET | SET Nuclear Proto-Oncogene | Protein Coding | 47 | GC09P128684 | 3.81 |
| LAMA3 | Laminin Subunit Alpha 3 | Protein Coding | 44 | GC18P023689 | 3.8 |
| REG3A | Regenerating Family Member 3 Alpha | Protein Coding | 39 | GC02M079157 | 3.8 |
| H2BC14 | H2B Clustered Histone 14 | Protein Coding | 27 | GC06P028798 | 3.8 |
| NDN | Necdin, MAGE Family Member | Protein Coding | 41 | GC15M023686 | 3.8 |
| NECTIN4 | Nectin Cell Adhesion Molecule 4 | Protein Coding | 37 | GC01M161071 | 3.8 |
| NMB | Neuromedin B | Protein Coding | 41 | GC15M084655 | 3.8 |
| PSAT1 | Phosphoserine Aminotransferase 1 | Protein Coding | 48 | GC09P078297 | 3.8 |
| DEFA4 | Defensin Alpha 4 | Protein Coding | 36 | GC08M006935 | 3.8 |
| NAPSA | Napsin A Aspartic Peptidase | Protein Coding | 41 | GC19M050385 | 3.8 |
| CAMSAP2 | Calmodulin Regulated Spectrin Associated Protein Family Member 2 | Protein Coding | 33 | GC01P200739 | 3.79 |
| SERBP1 | SERPINE1 MRNA Binding Protein 1 | Protein Coding | 35 | GC01M067407 | 3.79 |
| SPG7 | SPG7 Matrix AAA Peptidase Subunit, Paraplegin | Protein Coding | 43 | GC16P089492 | 3.79 |
| CD163 | CD163 Molecule | Protein Coding | 42 | GC12M007471 | 3.79 |
| DKKL1 | Dickkopf Like Acrosomal Protein 1 | Protein Coding | 37 | GC19P049360 | 3.79 |
| YWHAZ | Tyrosine 3-Monooxygenase/Tryptophan 5-Monooxygenase Activation Protein Zeta | Protein Coding | 48 | GC08M100917 | 3.79 |
| ADRB3 | Adrenoceptor Beta 3 | Protein Coding | 45 | GC08M037962 | 3.79 |
| CDK2AP1 | Cyclin Dependent Kinase 2 Associated Protein 1 | Protein Coding | 38 | GC12M123260 | 3.79 |
| BCHE | Butyrylcholinesterase | Protein Coding | 48 | GC03M165772 | 3.79 |
| FBXO6 | F-Box Protein 6 | Protein Coding | 36 | GC01P011664 | 3.78 |
| MIR124-2 | MicroRNA 124-2 | RNA Gene | 18 | GC08P064379 | 3.78 |
| FCN1 | Ficolin 1 | Protein Coding | 39 | GC09M134975 | 3.78 |
| RREB1 | Ras Responsive Element Binding Protein 1 | Protein Coding | 43 | GC06P007107 | 3.78 |
| SALL3 | Spalt Like Transcription Factor 3 | Protein Coding | 36 | GC18P078980 | 3.78 |
| KCNH4 | Potassium Voltage-Gated Channel Subfamily H Member 4 | Protein Coding | 37 | GC17M042160 | 3.78 |
| RGS1 | Regulator Of G Protein Signaling 1 | Protein Coding | 38 | GC01P192544 | 3.78 |
| NR4A2 | Nuclear Receptor Subfamily 4 Group A Member 2 | Protein Coding | 46 | GC02M156324 | 3.78 |
| PEX5L | Peroxisomal Biogenesis Factor 5 Like | Protein Coding | 35 | GC03M179794 | 3.77 |
| SMYD3 | SET And MYND Domain Containing 3 | Protein Coding | 41 | GC01M245749 | 3.77 |
| GALNT3 | Polypeptide N-Acetylgalactosaminyltransferase 3 | Protein Coding | 45 | GC02M165747 | 3.77 |
| MIR9-2 | MicroRNA 9-2 | RNA Gene | 18 | GC05M088666 | 3.77 |
| CXCL13 | C-X-C Motif Chemokine Ligand 13 | Protein Coding | 41 | GC04P077511 | 3.77 |
| XAF1 | XIAP Associated Factor 1 | Protein Coding | 39 | GC17P006757 | 3.77 |
| ARFGEF1 | ADP Ribosylation Factor Guanine Nucleotide Exchange Factor 1 | Protein Coding | 39 | GC08M067173 | 3.77 |
| PBX4 | PBX Homeobox 4 | Protein Coding | 35 | GC19M019561 | 3.77 |
| STAM | Signal Transducing Adaptor Molecule | Protein Coding | 42 | GC10P017645 | 3.77 |
| SLC16A1 | Solute Carrier Family 16 Member 1 | Protein Coding | 48 | GC01M112913 | 3.76 |
| CCL18 | C-C Motif Chemokine Ligand 18 | Protein Coding | 36 | GC17P036064 | 3.76 |
| MCM6 | Minichromosome Maintenance Complex Component 6 | Protein Coding | 43 | GC02M135839 | 3.76 |
| CRYAB | Crystallin Alpha B | Protein Coding | 45 | GC11M111908 | 3.76 |
| CUL4A | Cullin 4A | Protein Coding | 41 | GC13P113208 | 3.76 |
| TAP2 | Transporter 2, ATP Binding Cassette Subfamily B Member | Protein Coding | 44 | GC06M032821 | 3.76 |
| CNKSR2 | Connector Enhancer Of Kinase Suppressor Of Ras 2 | Protein Coding | 39 | GC0XP021392 | 3.75 |
| TREM1 | Triggering Receptor Expressed On Myeloid Cells 1 | Protein Coding | 41 | GC06M041267 | 3.75 |
| MYOG | Myogenin | Protein Coding | 39 | GC01M203083 | 3.75 |
| MIR340 | MicroRNA 340 | RNA Gene | 18 | GC05M180015 | 3.75 |
| SGK1 | Serum/Glucocorticoid Regulated Kinase 1 | Protein Coding | 48 | GC06M134169 | 3.75 |
| OPRM1 | Opioid Receptor Mu 1 | Protein Coding | 48 | GC06P154075 | 3.74 |
| HOXC9 | Homeobox C9 | Protein Coding | 36 | GC12P054201 | 3.74 |
| HTR5A | 5-Hydroxytryptamine Receptor 5A | Protein Coding | 42 | GC07P155070 | 3.74 |
| LINC01568 | Long Intergenic Non-Protein Coding RNA 1568 | RNA Gene | 13 | GC16P073386 | 3.74 |
| CCL26 | C-C Motif Chemokine Ligand 26 | Protein Coding | 37 | GC07M075769 | 3.74 |
| MT-ND4 | Mitochondrially Encoded NADH:Ubiquinone Oxidoreductase Core Subunit 4 | Protein Coding | 31 | GCMTP010762 | 3.74 |
| NOS1 | Nitric Oxide Synthase 1 | Protein Coding | 49 | GC12M117208 | 3.74 |
| JAKMIP2 | Janus Kinase And Microtubule Interacting Protein 2 | Protein Coding | 35 | GC05M147585 | 3.74 |
| SIGLEC7 | Sialic Acid Binding Ig Like Lectin 7 | Protein Coding | 39 | GC19P051142 | 3.73 |
| CDH11 | Cadherin 11 | Protein Coding | 48 | GC16M064882 | 3.73 |
| TMPRSS3 | Transmembrane Serine Protease 3 | Protein Coding | 41 | GC21M042371 | 3.73 |
| ADAM10 | ADAM Metallopeptidase Domain 10 | Protein Coding | 52 | GC15M058588 | 3.73 |
| PAX2 | Paired Box 2 | Protein Coding | 46 | GC10P100735 | 3.73 |
| RPL28 | Ribosomal Protein L28 | Protein Coding | 39 | GC19P055498 | 3.73 |
| PRDX1 | Peroxiredoxin 1 | Protein Coding | 49 | GC01M045511 | 3.73 |
| LAS1L | LAS1 Like Ribosome Biogenesis Factor | Protein Coding | 37 | GC0XM065512 | 3.73 |
| LCAT | Lecithin-Cholesterol Acyltransferase | Protein Coding | 47 | GC16M067939 | 3.73 |
| PANK4 | Pantothenate Kinase 4 (Inactive) | Protein Coding | 40 | GC01M002508 | 3.72 |
| ACKR1 | Atypical Chemokine Receptor 1 (Duffy Blood Group) | Protein Coding | 37 | GC01P159203 | 3.72 |
| ATXN2 | Ataxin 2 | Protein Coding | 42 | GC12M111443 | 3.72 |
| SMAD5 | SMAD Family Member 5 | Protein Coding | 41 | GC05P136132 | 3.72 |
| GSTO2 | Glutathione S-Transferase Omega 2 | Protein Coding | 43 | GC10P104268 | 3.72 |
| WDR97 | WD Repeat Domain 97 | Protein Coding | 21 | GC08P144108 | 3.72 |
| HIVEP3 | HIVEP Zinc Finger 3 | Protein Coding | 36 | GC01M041506 | 3.72 |
| UNC13B | Unc-13 Homolog B | Protein Coding | 41 | GC09P035161 | 3.72 |
| CYP11A1 | Cytochrome P450 Family 11 Subfamily A Member 1 | Protein Coding | 48 | GC15M074337 | 3.71 |
| MMRN2 | Multimerin 2 | Protein Coding | 34 | GC10M086935 | 3.71 |
| TRADD | TNFRSF1A Associated Via Death Domain | Protein Coding | 43 | GC16M067154 | 3.71 |
| EPS8 | Epidermal Growth Factor Receptor Pathway Substrate 8 | Protein Coding | 44 | GC12M015621 | 3.71 |
| FUCA1 | Alpha-L-Fucosidase 1 | Protein Coding | 47 | GC01M023845 | 3.71 |
| DHRS9 | Dehydrogenase/Reductase 9 | Protein Coding | 39 | GC02P169064 | 3.71 |
| LMO1 | LIM Domain Only 1 | Protein Coding | 43 | GC11M008224 | 3.71 |
| MIR500A | MicroRNA 500a | RNA Gene | 16 | GC0XP050008 | 3.71 |
| PAN2 | Poly(A) Specific Ribonuclease Subunit PAN2 | Protein Coding | 37 | GC12M056316 | 3.7 |
| MT-ATP6 | Mitochondrially Encoded ATP Synthase Membrane Subunit 6 | Protein Coding | 31 | GCMTP008531 | 3.7 |
| AKIP1 | A-Kinase Interacting Protein 1 | Protein Coding | 33 | GC11P008911 | 3.7 |
| CITED4 | Cbp/P300 Interacting Transactivator With Glu/Asp Rich Carboxy-Terminal Domain 4 | Protein Coding | 31 | GC01M040861 | 3.7 |
| PRR5 | Proline Rich 5 | Protein Coding | 39 | GC22P044668 | 3.7 |
| TSPEAR | Thrombospondin Type Laminin G Domain And EAR Repeats | Protein Coding | 32 | GC21M044497 | 3.7 |
| RNASET2 | Ribonuclease T2 | Protein Coding | 44 | GC06M166929 | 3.7 |
| S100A12 | S100 Calcium Binding Protein A12 | Protein Coding | 39 | GC01M153373 | 3.69 |
| MT-ND5 | Mitochondrially Encoded NADH:Ubiquinone Oxidoreductase Core Subunit 5 | Protein Coding | 31 | GCMTP012339 | 3.69 |
| GTF2B | General Transcription Factor IIB | Protein Coding | 42 | GC01M088853 | 3.69 |
| PSG9 | Pregnancy Specific Beta-1-Glycoprotein 9 | Protein Coding | 36 | GC19M043397 | 3.69 |
| TCERG1L | Transcription Elongation Regulator 1 Like | Protein Coding | 33 | GC10M131092 | 3.69 |
| MAPK6 | Mitogen-Activated Protein Kinase 6 | Protein Coding | 44 | GC15P051952 | 3.69 |
| PLOD1 | Procollagen-Lysine,2-Oxoglutarate 5-Dioxygenase 1 | Protein Coding | 41 | GC01P011934 | 3.69 |
| ASNS | Asparagine Synthetase (Glutamine-Hydrolyzing) | Protein Coding | 46 | GC07M097854 | 3.68 |
| LTBP2 | Latent Transforming Growth Factor Beta Binding Protein 2 | Protein Coding | 43 | GC14M074498 | 3.68 |
| RGCC | Regulator Of Cell Cycle | Protein Coding | 34 | GC13P041457 | 3.68 |
| LAMP1 | Lysosomal Associated Membrane Protein 1 | Protein Coding | 43 | GC13P113297 | 3.68 |
| TSKS | Testis Specific Serine Kinase Substrate | Protein Coding | 32 | GC19M049739 | 3.68 |
| TMPRSS11A | Transmembrane Serine Protease 11A | Protein Coding | 37 | GC04M067909 | 3.68 |
| PGA3 | Pepsinogen A3 | Protein Coding | 33 | GC11P061203 | 3.68 |
| EIF3A | Eukaryotic Translation Initiation Factor 3 Subunit A | Protein Coding | 41 | GC10M119034 | 3.68 |
| REN | Renin | Protein Coding | 48 | GC01M204154 | 3.67 |
| TWIST2 | Twist Family BHLH Transcription Factor 2 | Protein Coding | 41 | GC02P238848 | 3.67 |
| TXNRD2 | Thioredoxin Reductase 2 | Protein Coding | 46 | GC22M019863 | 3.67 |
| RIOX1 | Ribosomal Oxygenase 1 | Protein Coding | 23 | GC14P073492 | 3.67 |
| NOP2 | NOP2 Nucleolar Protein | Protein Coding | 36 | GC12M006556 | 3.67 |
| PGA5 | Pepsinogen A5 | Protein Coding | 33 | GC11P061241 | 3.67 |
| ZNHIT6 | Zinc Finger HIT-Type Containing 6 | Protein Coding | 33 | GC01M085649 | 3.67 |
| TBP | TATA-Box Binding Protein | Protein Coding | 48 | GC06P170554 | 3.66 |
| IKZF3 | IKAROS Family Zinc Finger 3 | Protein Coding | 41 | GC17M039759 | 3.66 |
| OLFM2 | Olfactomedin 2 | Protein Coding | 37 | GC19M009853 | 3.66 |
| POU2F1 | POU Class 2 Homeobox 1 | Protein Coding | 44 | GC01P167190 | 3.66 |
| NUP98 | Nucleoporin 98 And 96 Precursor | Protein Coding | 42 | GC11M003671 | 3.66 |
| PGA4 | Pepsinogen A4 | Protein Coding | 29 | GC11P061222 | 3.66 |
| LRRC3B | Leucine Rich Repeat Containing 3B | Protein Coding | 33 | GC03P026640 | 3.66 |
| LDHB | Lactate Dehydrogenase B | Protein Coding | 46 | GC12M021635 | 3.66 |
| PAX9 | Paired Box 9 | Protein Coding | 46 | GC14P036657 | 3.66 |
| PKNOX1 | PBX/Knotted 1 Homeobox 1 | Protein Coding | 40 | GC21P042974 | 3.65 |
| MIR622 | MicroRNA 622 | RNA Gene | 13 | GC13P090231 | 3.65 |
| ALDOB | Aldolase, Fructose-Bisphosphate B | Protein Coding | 45 | GC09M101420 | 3.65 |
| RPL27A | Ribosomal Protein L27a | Protein Coding | 40 | GC11P008682 | 3.65 |
| GNG2 | G Protein Subunit Gamma 2 | Protein Coding | 43 | GC14P051826 | 3.65 |
| RELCH | RAB11 Binding And LisH Domain, Coiled-Coil And HEAT Repeat Containing | Protein Coding | 27 | GC18P062188 | 3.65 |
| SCT | Secretin | Protein Coding | 35 | GC11M000626 | 3.65 |
| KDF1 | Keratinocyte Differentiation Factor 1 | Protein Coding | 33 | GC01M026949 | 3.65 |
| RPS3 | Ribosomal Protein S3 | Protein Coding | 44 | GC11P075836 | 3.65 |
| PLK3 | Polo Like Kinase 3 | Protein Coding | 43 | GC01P044799 | 3.65 |
| MIR362 | MicroRNA 362 | RNA Gene | 14 | GC0XP050072 | 3.65 |
| GRK3 | G Protein-Coupled Receptor Kinase 3 | Protein Coding | 38 | GC22P025565 | 3.64 |
| EDN3 | Endothelin 3 | Protein Coding | 47 | GC20P059300 | 3.64 |
| TRPM1 | Transient Receptor Potential Cation Channel Subfamily M Member 1 | Protein Coding | 43 | GC15M031001 | 3.64 |
| ASL | Argininosuccinate Lyase | Protein Coding | 45 | GC07P066075 | 3.64 |
| GRHL2 | Grainyhead Like Transcription Factor 2 | Protein Coding | 40 | GC08P101492 | 3.64 |
| ETAA1 | ETAA1 Activator Of ATR Kinase | Protein Coding | 32 | GC02P067397 | 3.64 |
| GRK1 | G Protein-Coupled Receptor Kinase 1 | Protein Coding | 42 | GC13P113645 | 3.64 |
| L3MBTL1 | L3MBTL Histone Methyl-Lysine Binding Protein 1 | Protein Coding | 38 | GC20P043507 | 3.64 |
| ISLR | Immunoglobulin Superfamily Containing Leucine Rich Repeat | Protein Coding | 36 | GC15P074173 | 3.64 |
| CPS1 | Carbamoyl-Phosphate Synthase 1 | Protein Coding | 45 | GC02P210477 | 3.64 |
| DCHS1 | Dachsous Cadherin-Related 1 | Protein Coding | 39 | GC11M006621 | 3.64 |
| ACTA1 | Actin Alpha 1, Skeletal Muscle | Protein Coding | 47 | GC01M229431 | 3.64 |
| EPHA5 | EPH Receptor A5 | Protein Coding | 45 | GC04M065319 | 3.64 |
| PTS | 6-Pyruvoyltetrahydropterin Synthase | Protein Coding | 47 | GC11P112226 | 3.64 |
| RPL35A | Ribosomal Protein L35a | Protein Coding | 44 | GC03P197949 | 3.64 |
| RIC3 | RIC3 Acetylcholine Receptor Chaperone | Protein Coding | 35 | GC11M008092 | 3.64 |
| FBXL2 | F-Box And Leucine Rich Repeat Protein 2 | Protein Coding | 36 | GC03P033293 | 3.64 |
| IQUB | IQ Motif And Ubiquitin Domain Containing | Protein Coding | 32 | GC07M123451 | 3.63 |
| VPS18 | VPS18 Core Subunit Of CORVET And HOPS Complexes | Protein Coding | 36 | GC15P040894 | 3.63 |
| CHST8 | Carbohydrate Sulfotransferase 8 | Protein Coding | 40 | GC19P033621 | 3.63 |
| VSTM4 | V-Set And Transmembrane Domain Containing 4 | Protein Coding | 32 | GC10M049014 | 3.63 |
| HTATIP2 | HIV-1 Tat Interactive Protein 2 | Protein Coding | 40 | GC11P020363 | 3.63 |
| MIR188 | MicroRNA 188 | RNA Gene | 16 | GC0XP050003 | 3.63 |
| AATF | Apoptosis Antagonizing Transcription Factor | Protein Coding | 40 | GC17P036948 | 3.63 |
| SOST | Sclerostin | Protein Coding | 44 | GC17M043753 | 3.63 |
| BRD7 | Bromodomain Containing 7 | Protein Coding | 41 | GC16M050313 | 3.63 |
| ATP6V1E1 | ATPase H+ Transporting V1 Subunit E1 | Protein Coding | 44 | GC22M017592 | 3.63 |
| RPA1 | Replication Protein A1 | Protein Coding | 45 | GC17P001829 | 3.62 |
| SETD4 | SET Domain Containing 4 | Protein Coding | 32 | GC21M036034 | 3.62 |
| PFKP | Phosphofructokinase, Platelet | Protein Coding | 45 | GC10P003066 | 3.62 |
| WWC1 | WW And C2 Domain Containing 1 | Protein Coding | 42 | GC05P168291 | 3.62 |
| GID8 | GID Complex Subunit 8 Homolog | Protein Coding | 34 | GC20P062938 | 3.62 |
| GNG4 | G Protein Subunit Gamma 4 | Protein Coding | 39 | GC01M235547 | 3.62 |
| SUV39H1 | Suppressor Of Variegation 3-9 Homolog 1 | Protein Coding | 43 | GC0XP048698 | 3.62 |
| RAG2 | Recombination Activating 2 | Protein Coding | 42 | GC11M036575 | 3.62 |
| IL1RAPL2 | Interleukin 1 Receptor Accessory Protein Like 2 | Protein Coding | 37 | GC0XP104566 | 3.62 |
| SETD6 | SET Domain Containing 6, Protein Lysine Methyltransferase | Protein Coding | 36 | GC16P058514 | 3.61 |
| MERTK | MER Proto-Oncogene, Tyrosine Kinase | Protein Coding | 50 | GC02P111898 | 3.61 |
| CORO1B | Coronin 1B | Protein Coding | 36 | GC11M067435 | 3.61 |
| ARNTL | Aryl Hydrocarbon Receptor Nuclear Translocator Like | Protein Coding | 42 | GC11P013276 | 3.61 |
| CCL22 | C-C Motif Chemokine Ligand 22 | Protein Coding | 38 | GC16P057359 | 3.61 |
| CLDN23 | Claudin 23 | Protein Coding | 36 | GC08P008701 | 3.61 |
| SKI | SKI Proto-Oncogene | Protein Coding | 45 | GC01P002228 | 3.61 |
| GNG10 | G Protein Subunit Gamma 10 | Protein Coding | 39 | GC09P111661 | 3.61 |
| WHRN | Whirlin | Protein Coding | 32 | GC09M114403 | 3.6 |
| MIR489 | MicroRNA 489 | RNA Gene | 16 | GC07M093483 | 3.6 |
| BTRC | Beta-Transducin Repeat Containing E3 Ubiquitin Protein Ligase | Protein Coding | 46 | GC10P101354 | 3.6 |
| LOC109433679 | Enhancer Downstream Of BMP4 | Biological Region | 1 | GC14P053944 | 3.6 |
| RAB5C | RAB5C, Member RAS Oncogene Family | Protein Coding | 41 | GC17M042124 | 3.6 |
| AIM2 | Absent In Melanoma 2 | Protein Coding | 41 | GC01M159062 | 3.6 |
| MYLK3 | Myosin Light Chain Kinase 3 | Protein Coding | 41 | GC16M046714 | 3.6 |
| RNF7 | Ring Finger Protein 7 | Protein Coding | 41 | GC03P141738 | 3.6 |
| BRS3 | Bombesin Receptor Subtype 3 | Protein Coding | 43 | GC0XP136482 | 3.6 |
| CD93 | CD93 Molecule | Protein Coding | 40 | GC20M023079 | 3.6 |
| FADS1 | Fatty Acid Desaturase 1 | Protein Coding | 44 | GC11M061799 | 3.6 |
| OSBP | Oxysterol Binding Protein | Protein Coding | 39 | GC11M061253 | 3.59 |
| CYP2C8 | Cytochrome P450 Family 2 Subfamily C Member 8 | Protein Coding | 48 | GC10M095038 | 3.59 |
| MIR501 | MicroRNA 501 | RNA Gene | 16 | GC0XP050074 | 3.59 |
| RSF1 | Remodeling And Spacing Factor 1 | Protein Coding | 35 | GC11M077659 | 3.59 |
| SLC37A4 | Solute Carrier Family 37 Member 4 | Protein Coding | 43 | GC11M119024 | 3.59 |
| GNG8 | G Protein Subunit Gamma 8 | Protein Coding | 36 | GC19M046634 | 3.59 |
| CRCS10 | Colorectal Cancer, Susceptibility To, 10 | Genetic Locus | 1 | GC00U934345 | 3.58 |
| SEPTIN4 | Septin 4 | Protein Coding | 30 | GC17M058522 | 3.58 |
| DNTT | DNA Nucleotidylexotransferase | Protein Coding | 42 | GC10P096304 | 3.58 |
| WDCP | WD Repeat And Coiled Coil Containing | Protein Coding | 25 | GC02M024032 | 3.58 |
| MSI2 | Musashi RNA Binding Protein 2 | Protein Coding | 41 | GC17P057255 | 3.58 |
| CRK | CRK Proto-Oncogene, Adaptor Protein | Protein Coding | 45 | GC17M001420 | 3.58 |
| DUS2 | Dihydrouridine Synthase 2 | Protein Coding | 36 | GC16P068021 | 3.58 |
| DSEL | Dermatan Sulfate Epimerase Like | Protein Coding | 35 | GC18M067506 | 3.58 |
| TTLL10 | Tubulin Tyrosine Ligase Like 10 | Protein Coding | 31 | GC01P001173 | 3.58 |
| LHFPL5 | LHFPL Tetraspan Subfamily Member 5 | Protein Coding | 33 | GC06P047446 | 3.57 |
| TRAP1 | TNF Receptor Associated Protein 1 | Protein Coding | 43 | GC16M003652 | 3.57 |
| IFIH1 | Interferon Induced With Helicase C Domain 1 | Protein Coding | 47 | GC02M162267 | 3.57 |
| MLXIPL | MLX Interacting Protein Like | Protein Coding | 41 | GC07M073593 | 3.57 |
| RPS12 | Ribosomal Protein S12 | Protein Coding | 41 | GC06P132814 | 3.57 |
| AMDHD2 | Amidohydrolase Domain Containing 2 | Protein Coding | 37 | GC16P004227 | 3.57 |
| ATAD1 | ATPase Family AAA Domain Containing 1 | Protein Coding | 41 | GC10M087751 | 3.57 |
| WAC | WW Domain Containing Adaptor With Coiled-Coil | Protein Coding | 39 | GC10P028557 | 3.57 |
| ABCC8 | ATP Binding Cassette Subfamily C Member 8 | Protein Coding | 45 | GC11M017392 | 3.57 |
| GFI1 | Growth Factor Independent 1 Transcriptional Repressor | Protein Coding | 41 | GC01M092474 | 3.57 |
| PTGES | Prostaglandin E Synthase | Protein Coding | 41 | GC09M129738 | 3.57 |
| RBL2 | RB Transcriptional Corepressor Like 2 | Protein Coding | 43 | GC16P053433 | 3.56 |
| CLCN1 | Chloride Voltage-Gated Channel 1 | Protein Coding | 44 | GC07P143316 | 3.56 |
| PRMT5 | Protein Arginine Methyltransferase 5 | Protein Coding | 42 | GC14M022920 | 3.56 |
| DOCK4 | Dedicator Of Cytokinesis 4 | Protein Coding | 39 | GC07M111726 | 3.56 |
| SART1 | Spliceosome Associated Factor 1, Recruiter Of U4/U6.U5 Tri-SnRNP | Protein Coding | 40 | GC11P065979 | 3.56 |
| C2CD6 | C2 Calcium Dependent Domain Containing 6 | Protein Coding | 23 | GC02M201488 | 3.56 |
| OR1E2 | Olfactory Receptor Family 1 Subfamily E Member 2 | Protein Coding | 31 | GC17M003432 | 3.56 |
| SLC25A5 | Solute Carrier Family 25 Member 5 | Protein Coding | 44 | GC0XP119468 | 3.56 |
| CTHRC1 | Collagen Triple Helix Repeat Containing 1 | Protein Coding | 41 | GC08P103371 | 3.55 |
| TRRAP | Transformation/Transcription Domain Associated Protein | Protein Coding | 45 | GC07P098877 | 3.55 |
| REV3L | REV3 Like, DNA Directed Polymerase Zeta Catalytic Subunit | Protein Coding | 44 | GC06M111299 | 3.55 |
| ZNF624 | Zinc Finger Protein 624 | Protein Coding | 34 | GC17M016620 | 3.55 |
| COL14A1 | Collagen Type XIV Alpha 1 Chain | Protein Coding | 42 | GC08P120062 | 3.55 |
| DNM2 | Dynamin 2 | Protein Coding | 49 | GC19P010718 | 3.55 |
| SNX8 | Sorting Nexin 8 | Protein Coding | 34 | GC07M002251 | 3.55 |
| ITPRID1 | ITPR Interacting Domain Containing 1 | Protein Coding | 23 | GC07P031514 | 3.55 |
| EFNA3 | Ephrin A3 | Protein Coding | 44 | GC01P155078 | 3.55 |
| CIC | Capicua Transcriptional Repressor | Protein Coding | 41 | GC19P042268 | 3.55 |
| PROK1 | Prokineticin 1 | Protein Coding | 36 | GC01P110451 | 3.54 |
| IFNAR2 | Interferon Alpha And Beta Receptor Subunit 2 | Protein Coding | 48 | GC21P033229 | 3.54 |
| IL13RA1 | Interleukin 13 Receptor Subunit Alpha 1 | Protein Coding | 42 | GC0XP118727 | 3.54 |
| ZNF292 | Zinc Finger Protein 292 | Protein Coding | 35 | GC06P087153 | 3.54 |
| GCG | Glucagon | Protein Coding | 41 | GC02M162142 | 3.54 |
| ERAL1 | Era Like 12S Mitochondrial RRNA Chaperone 1 | Protein Coding | 39 | GC17P028854 | 3.54 |
| HTR3C | 5-Hydroxytryptamine Receptor 3C | Protein Coding | 37 | GC03P184056 | 3.54 |
| MAGEC1 | MAGE Family Member C1 | Protein Coding | 33 | GC0XP141905 | 3.54 |
| CSTB | Cystatin B | Protein Coding | 45 | GC21M043772 | 3.53 |
| HADHB | Hydroxyacyl-CoA Dehydrogenase Trifunctional Multienzyme Complex Subunit Beta | Protein Coding | 47 | GC02P026243 | 3.53 |
| ABHD11-AS1 | ABHD11 Antisense RNA 1 (Tail To Tail) | RNA Gene | 16 | GC07P073735 | 3.53 |
| FNIP2 | Folliculin Interacting Protein 2 | Protein Coding | 36 | GC04P158769 | 3.53 |
| COL6A3 | Collagen Type VI Alpha 3 Chain | Protein Coding | 44 | GC02M237324 | 3.53 |
| HRH2 | Histamine Receptor H2 | Protein Coding | 44 | GC05P175659 | 3.52 |
| C3 | Complement C3 | Protein Coding | 47 | GC19M006677 | 3.52 |
| NUMB | NUMB Endocytic Adaptor Protein | Protein Coding | 47 | GC14M073275 | 3.52 |
| DYNLRB1 | Dynein Light Chain Roadblock-Type 1 | Protein Coding | 39 | GC20P034516 | 3.52 |
| TAF1 | TATA-Box Binding Protein Associated Factor 1 | Protein Coding | 45 | GC0XP071366 | 3.52 |
| STK32C | Serine/Threonine Kinase 32C | Protein Coding | 36 | GC10M132207 | 3.52 |
| PRSS2 | Serine Protease 2 | Protein Coding | 39 | GC07P144959 | 3.52 |
| NTSR2 | Neurotensin Receptor 2 | Protein Coding | 41 | GC02M011649 | 3.51 |
| UGT1A9 | UDP Glucuronosyltransferase Family 1 Member A9 | Protein Coding | 43 | GC02P233671 | 3.51 |
| GNG3 | G Protein Subunit Gamma 3 | Protein Coding | 38 | GC11P062707 | 3.51 |
| CHAT | Choline O-Acetyltransferase | Protein Coding | 47 | GC10P049609 | 3.51 |
| RPS15A | Ribosomal Protein S15a | Protein Coding | 41 | GC16M018781 | 3.51 |
| ASAH1 | N-Acylsphingosine Amidohydrolase 1 | Protein Coding | 46 | GC08M018055 | 3.51 |
| IL21 | Interleukin 21 | Protein Coding | 43 | GC04M122612 | 3.51 |
| EGLN1 | Egl-9 Family Hypoxia Inducible Factor 1 | Protein Coding | 48 | GC01M231363 | 3.51 |
| CCR2 | C-C Motif Chemokine Receptor 2 | Protein Coding | 45 | GC03P046356 | 3.51 |
| LMO2 | LIM Domain Only 2 | Protein Coding | 42 | GC11M033858 | 3.51 |
| POLR2A | RNA Polymerase II Subunit A | Protein Coding | 44 | GC17P008025 | 3.51 |
| AICDA | Activation Induced Cytidine Deaminase | Protein Coding | 45 | GC12M008602 | 3.5 |
| AKR1A1 | Aldo-Keto Reductase Family 1 Member A1 | Protein Coding | 44 | GC01P045550 | 3.5 |
| DDC | Dopa Decarboxylase | Protein Coding | 52 | GC07M050458 | 3.5 |
| SEZ6L | Seizure Related 6 Homolog Like | Protein Coding | 38 | GC22P026169 | 3.5 |
| MIR627 | MicroRNA 627 | RNA Gene | 16 | GC15M042199 | 3.5 |
| GNG13 | G Protein Subunit Gamma 13 | Protein Coding | 36 | GC16M001136 | 3.5 |
| TJP2 | Tight Junction Protein 2 | Protein Coding | 45 | GC09P069121 | 3.5 |
| MT-ND2 | Mitochondrially Encoded NADH:Ubiquinone Oxidoreductase Core Subunit 2 | Protein Coding | 32 | GCMTP004472 | 3.5 |
| TRIM29 | Tripartite Motif Containing 29 | Protein Coding | 39 | GC11M120111 | 3.5 |
| SELENOP | Selenoprotein P | Protein Coding | 31 | GC05M042800 | 3.5 |
| AZGP1 | Alpha-2-Glycoprotein 1, Zinc-Binding | Protein Coding | 43 | GC07M099967 | 3.5 |
| ANAPC4 | Anaphase Promoting Complex Subunit 4 | Protein Coding | 35 | GC04P025379 | 3.49 |
| BPI | Bactericidal Permeability Increasing Protein | Protein Coding | 41 | GC20P038304 | 3.49 |
| TARDBP | TAR DNA Binding Protein | Protein Coding | 45 | GC01P011013 | 3.49 |
| SCGB3A1 | Secretoglobin Family 3A Member 1 | Protein Coding | 35 | GC05M180590 | 3.49 |
| AMBP | Alpha-1-Microglobulin/Bikunin Precursor | Protein Coding | 41 | GC09M114060 | 3.49 |
| APTX | Aprataxin | Protein Coding | 44 | GC09M032886 | 3.49 |
| SLCO1B1 | Solute Carrier Organic Anion Transporter Family Member 1B1 | Protein Coding | 48 | GC12P021132 | 3.48 |
| CCL7 | C-C Motif Chemokine Ligand 7 | Protein Coding | 41 | GC17P034270 | 3.48 |
| SHOC2 | SHOC2 Leucine Rich Repeat Scaffold Protein | Protein Coding | 41 | GC10P110919 | 3.48 |
| SLC25A13 | Solute Carrier Family 25 Member 13 | Protein Coding | 46 | GC07M096120 | 3.48 |
| UNG | Uracil DNA Glycosylase | Protein Coding | 46 | GC12P109097 | 3.48 |
| SBF2-AS1 | SBF2 Antisense RNA 1 | RNA Gene | 15 | GC11P009758 | 3.48 |
| OTC | Ornithine Carbamoyltransferase | Protein Coding | 47 | GC0XP038353 | 3.48 |
| VIPR1 | Vasoactive Intestinal Peptide Receptor 1 | Protein Coding | 45 | GC03P042490 | 3.48 |
| LOXL1 | Lysyl Oxidase Like 1 | Protein Coding | 43 | GC15P073925 | 3.48 |
| RYR2 | Ryanodine Receptor 2 | Protein Coding | 47 | GC01P237042 | 3.47 |
| CHFR | Checkpoint With Forkhead And Ring Finger Domains | Protein Coding | 40 | GC12M132822 | 3.47 |
| TNFRSF19 | TNF Receptor Superfamily Member 19 | Protein Coding | 39 | GC13P023570 | 3.47 |
| BPIFB2 | BPI Fold Containing Family B Member 2 | Protein Coding | 33 | GC20P033007 | 3.47 |
| GLUL | Glutamate-Ammonia Ligase | Protein Coding | 49 | GC01M182350 | 3.46 |
| P2RY14 | Purinergic Receptor P2Y14 | Protein Coding | 42 | GC03M151212 | 3.46 |
| PIGO | Phosphatidylinositol Glycan Anchor Biosynthesis Class O | Protein Coding | 41 | GC09M035088 | 3.46 |
| ZSCAN5A | Zinc Finger And SCAN Domain Containing 5A | Protein Coding | 33 | GC19M056221 | 3.46 |
| SLC31A1 | Solute Carrier Family 31 Member 1 | Protein Coding | 42 | GC09P113221 | 3.46 |
| KCNA10 | Potassium Voltage-Gated Channel Subfamily A Member 10 | Protein Coding | 37 | GC01M110517 | 3.46 |
| ERV3-1 | Endogenous Retrovirus Group 3 Member 1, Envelope | Protein Coding | 29 | GC07M065002 | 3.46 |
| FKTN | Fukutin | Protein Coding | 39 | GC09P105558 | 3.46 |
| RNPEPL1 | Arginyl Aminopeptidase Like 1 | Protein Coding | 36 | GC02P240565 | 3.46 |
| GDAP1L1 | Ganglioside Induced Differentiation Associated Protein 1 Like 1 | Protein Coding | 34 | GC20P044247 | 3.46 |
| CPO | Carboxypeptidase O | Protein Coding | 33 | GC02P206792 | 3.46 |
| AMTN | Amelotin | Protein Coding | 31 | GC04P070518 | 3.46 |
| SRSF1 | Serine And Arginine Rich Splicing Factor 1 | Protein Coding | 41 | GC17M058000 | 3.45 |
| PLA2G1B | Phospholipase A2 Group IB | Protein Coding | 46 | GC12M120322 | 3.45 |
| PSMD4 | Proteasome 26S Subunit, Non-ATPase 4 | Protein Coding | 44 | GC01P151227 | 3.45 |
| POLR1H | RNA Polymerase I Subunit H | Protein Coding | 31 | GC06P048997 | 3.45 |
| LINC00672 | Long Intergenic Non-Protein Coding RNA 672 | RNA Gene | 17 | GC17P038925 | 3.45 |
| FYN | FYN Proto-Oncogene, Src Family Tyrosine Kinase | Protein Coding | 48 | GC06M111660 | 3.44 |
| RFC3 | Replication Factor C Subunit 3 | Protein Coding | 38 | GC13P033818 | 3.44 |
| HAX1 | HCLS1 Associated Protein X-1 | Protein Coding | 43 | GC01P154273 | 3.44 |
| SLC16A4 | Solute Carrier Family 16 Member 4 | Protein Coding | 39 | GC01M110362 | 3.44 |
| B3GALT5 | Beta-1,3-Galactosyltransferase 5 | Protein Coding | 40 | GC21P039556 | 3.44 |
| PDK1 | Pyruvate Dehydrogenase Kinase 1 | Protein Coding | 47 | GC02P172555 | 3.44 |
| ANAPC1 | Anaphase Promoting Complex Subunit 1 | Protein Coding | 40 | GC02M111611 | 3.44 |
| PBK | PDZ Binding Kinase | Protein Coding | 43 | GC08M027809 | 3.44 |
| GAL | Galanin And GMAP Prepropeptide | Protein Coding | 44 | GC11P068684 | 3.44 |
| DAXX | Death Domain Associated Protein | Protein Coding | 44 | GC06M033318 | 3.43 |
| SLC22A5 | Solute Carrier Family 22 Member 5 | Protein Coding | 46 | GC05P132369 | 3.43 |
| ZNF146 | Zinc Finger Protein 146 | Protein Coding | 37 | GC19P038255 | 3.43 |
| ZMYM4 | Zinc Finger MYM-Type Containing 4 | Protein Coding | 36 | GC01P035268 | 3.43 |
| SLC5A5 | Solute Carrier Family 5 Member 5 | Protein Coding | 45 | GC19P023315 | 3.43 |
| COL4A4 | Collagen Type IV Alpha 4 Chain | Protein Coding | 43 | GC02M226967 | 3.43 |
| METTL3 | Methyltransferase Like 3 | Protein Coding | 39 | GC14M021498 | 3.43 |
| INKA2-AS1 | INKA2 Antisense RNA 1 | RNA Gene | 11 | GC01P111740 | 3.43 |
| ARL11 | ADP Ribosylation Factor Like GTPase 11 | Protein Coding | 39 | GC13P049628 | 3.43 |
| TARS1 | Threonyl-TRNA Synthetase 1 | Protein Coding | 36 | GC05P033441 | 3.43 |
| BICC1 | BicC Family RNA Binding Protein 1 | Protein Coding | 36 | GC10P058513 | 3.42 |
| GRK6 | G Protein-Coupled Receptor Kinase 6 | Protein Coding | 45 | GC05P177403 | 3.42 |
| MED13L | Mediator Complex Subunit 13L | Protein Coding | 39 | GC12M115953 | 3.42 |
| TPT1 | Tumor Protein, Translationally-Controlled 1 | Protein Coding | 46 | GC13M045333 | 3.42 |
| BGN | Biglycan | Protein Coding | 43 | GC0XP153494 | 3.42 |
| SLC7A11 | Solute Carrier Family 7 Member 11 | Protein Coding | 44 | GC04M138164 | 3.42 |
| STRADA | STE20 Related Adaptor Alpha | Protein Coding | 45 | GC17M063683 | 3.41 |
| DMKN | Dermokine | Protein Coding | 34 | GC19M042548 | 3.41 |
| NAA15 | N-Alpha-Acetyltransferase 15, NatA Auxiliary Subunit | Protein Coding | 39 | GC04P139301 | 3.41 |
| PCBP2-OT1 | PCBP2 Overlapping Transcript 1 | RNA Gene | 12 | GC12P053464 | 3.41 |
| HEPACAM | Hepatic And Glial Cell Adhesion Molecule | Protein Coding | 40 | GC11M124919 | 3.41 |
| GAB2 | GRB2 Associated Binding Protein 2 | Protein Coding | 43 | GC11M078215 | 3.41 |
| PPP1R3A | Protein Phosphatase 1 Regulatory Subunit 3A | Protein Coding | 42 | GC07M113876 | 3.41 |
| PCDH10 | Protocadherin 10 | Protein Coding | 39 | GC04P133149 | 3.4 |
| CXCL11 | C-X-C Motif Chemokine Ligand 11 | Protein Coding | 40 | GC04M076033 | 3.4 |
| RERG | RAS Like Estrogen Regulated Growth Inhibitor | Protein Coding | 38 | GC12M015151 | 3.4 |
| GGH | Gamma-Glutamyl Hydrolase | Protein Coding | 42 | GC08M063015 | 3.4 |
| DPP6 | Dipeptidyl Peptidase Like 6 | Protein Coding | 43 | GC07P153748 | 3.4 |
| KDM6B | Lysine Demethylase 6B | Protein Coding | 42 | GC17P007834 | 3.4 |
| CD83 | CD83 Molecule | Protein Coding | 39 | GC06P014117 | 3.4 |
| ADAM15 | ADAM Metallopeptidase Domain 15 | Protein Coding | 41 | GC01P155023 | 3.39 |
| CUZD1 | CUB And Zona Pellucida Like Domains 1 | Protein Coding | 36 | GC10M122833 | 3.39 |
| DCT | Dopachrome Tautomerase | Protein Coding | 41 | GC13M094436 | 3.39 |
| MYO9B | Myosin IXB | Protein Coding | 44 | GC19P023294 | 3.39 |
| POLR1D | RNA Polymerase I And III Subunit D | Protein Coding | 45 | GC13P027620 | 3.39 |
| MMP16 | Matrix Metallopeptidase 16 | Protein Coding | 44 | GC08M088032 | 3.39 |
| LUM | Lumican | Protein Coding | 41 | GC12M091102 | 3.39 |
| TULP1 | TUB Like Protein 1 | Protein Coding | 42 | GC06M042216 | 3.39 |
| HOXB2 | Homeobox B2 | Protein Coding | 40 | GC17M048540 | 3.38 |
| FUT8 | Fucosyltransferase 8 | Protein Coding | 43 | GC14P065411 | 3.38 |
| LRRC47 | Leucine Rich Repeat Containing 47 | Protein Coding | 29 | GC01M003778 | 3.38 |
| ZBTB7A | Zinc Finger And BTB Domain Containing 7A | Protein Coding | 36 | GC19M004045 | 3.38 |
| ZFP90 | ZFP90 Zinc Finger Protein | Protein Coding | 36 | GC16P068530 | 3.38 |
| FAM110B | Family With Sequence Similarity 110 Member B | Protein Coding | 35 | GC08P057995 | 3.37 |
| LINC00582 | Long Intergenic Non-Protein Coding RNA 582 | RNA Gene | 14 | GC01M231594 | 3.37 |
| LINC02046 | Long Intergenic Non-Protein Coding RNA 2046 | RNA Gene | 10 | GC03P148282 | 3.37 |
| ANKRD20A21P | Ankyrin Repeat Domain 20 Family Member A21, Pseudogene | Pseudogene | 6 | GC20M030683 | 3.37 |
| TDGF1P1 | Teratocarcinoma-Derived Growth Factor 1 Pseudogene 1 | Pseudogene | 6 | GC0XM038395 | 3.37 |
| MIR487B | MicroRNA 487b | RNA Gene | 17 | GC14P104812 | 3.37 |
| ALDH9A1 | Aldehyde Dehydrogenase 9 Family Member A1 | Protein Coding | 41 | GC01M165667 | 3.37 |
| TNFSF8 | TNF Superfamily Member 8 | Protein Coding | 37 | GC09M114893 | 3.37 |
| H1-3 | H1.3 Linker Histone, Cluster Member | Protein Coding | 30 | GC06M027296 | 3.37 |
| PTGIS | Prostaglandin I2 Synthase | Protein Coding | 47 | GC20M049503 | 3.37 |
| DKK2 | Dickkopf WNT Signaling Pathway Inhibitor 2 | Protein Coding | 43 | GC04M106921 | 3.37 |
| DSC3 | Desmocollin 3 | Protein Coding | 42 | GC18M030990 | 3.37 |
| HOXB6 | Homeobox B6 | Protein Coding | 36 | GC17M048603 | 3.36 |
| FCGR1A | Fc Fragment Of IgG Receptor Ia | Protein Coding | 41 | GC01P149754 | 3.36 |
| TSHZ1 | Teashirt Zinc Finger Homeobox 1 | Protein Coding | 40 | GC18P075210 | 3.36 |
| MIR508 | MicroRNA 508 | RNA Gene | 15 | GC0XM147236 | 3.36 |
| VAV1 | Vav Guanine Nucleotide Exchange Factor 1 | Protein Coding | 47 | GC19P006772 | 3.36 |
| OLR1 | Oxidized Low Density Lipoprotein Receptor 1 | Protein Coding | 44 | GC12M013864 | 3.35 |
| TMEM170B | Transmembrane Protein 170B | Protein Coding | 27 | GC06P011537 | 3.35 |
| OSGIN2 | Oxidative Stress Induced Growth Inhibitor Family Member 2 | Protein Coding | 31 | GC08P089901 | 3.35 |
| SLC22A4 | Solute Carrier Family 22 Member 4 | Protein Coding | 43 | GC05P132294 | 3.35 |
| PKD2 | Polycystin 2, Transient Receptor Potential Cation Channel | Protein Coding | 46 | GC04P088007 | 3.35 |
| HHAT | Hedgehog Acyltransferase | Protein Coding | 41 | GC01P210328 | 3.35 |
| PARP8 | Poly(ADP-Ribose) Polymerase Family Member 8 | Protein Coding | 39 | GC05P050665 | 3.35 |
| CLSTN3 | Calsyntenin 3 | Protein Coding | 35 | GC12P008242 | 3.35 |
| MIR1-1 | MicroRNA 1-1 | RNA Gene | 19 | GC20P062893 | 3.35 |
| MIR99B | MicroRNA 99b | RNA Gene | 18 | GC19P051692 | 3.34 |
| CCDC9B | Coiled-Coil Domain Containing 9B | Protein Coding | 21 | GC15M040333 | 3.34 |
| CXCL2 | C-X-C Motif Chemokine Ligand 2 | Protein Coding | 40 | GC04M074097 | 3.34 |
| BOC | BOC Cell Adhesion Associated, Oncogene Regulated | Protein Coding | 41 | GC03P113211 | 3.34 |
| GABPB1 | GA Binding Protein Transcription Factor Subunit Beta 1 | Protein Coding | 38 | GC15M050275 | 3.34 |
| UGT1A | UDP Glucuronosyltransferase Family 1 Member A Complex Locus | Uncategorized | 9 | GC02P233586 | 3.33 |
| PLCG2 | Phospholipase C Gamma 2 | Protein Coding | 51 | GC16P081773 | 3.33 |
| RPGR | Retinitis Pigmentosa GTPase Regulator | Protein Coding | 40 | GC0XM038269 | 3.33 |
| PLA2G7 | Phospholipase A2 Group VII | Protein Coding | 50 | GC06M046704 | 3.33 |
| HLA-DPA1 | Major Histocompatibility Complex, Class II, DP Alpha 1 | Protein Coding | 40 | GC06M033064 | 3.33 |
| GRK7 | G Protein-Coupled Receptor Kinase 7 | Protein Coding | 39 | GC03P141778 | 3.33 |
| STAG3 | Stromal Antigen 3 | Protein Coding | 41 | GC07P100177 | 3.33 |
| ZZZ3 | Zinc Finger ZZ-Type Containing 3 | Protein Coding | 34 | GC01M077562 | 3.33 |
| SSTR3 | Somatostatin Receptor 3 | Protein Coding | 45 | GC22M037204 | 3.33 |
| FGF18 | Fibroblast Growth Factor 18 | Protein Coding | 41 | GC05P171419 | 3.33 |
| RPL31 | Ribosomal Protein L31 | Protein Coding | 42 | GC02P100985 | 3.32 |
| ZNHIT1 | Zinc Finger HIT-Type Containing 1 | Protein Coding | 36 | GC07P101218 | 3.32 |
| DUSP21 | Dual Specificity Phosphatase 21 | Protein Coding | 31 | GC0XP044844 | 3.32 |
| GSTO1 | Glutathione S-Transferase Omega 1 | Protein Coding | 43 | GC10P104235 | 3.32 |
| AHSG | Alpha 2-HS Glycoprotein | Protein Coding | 44 | GC03P186612 | 3.32 |
| TNIK | TRAF2 And NCK Interacting Kinase | Protein Coding | 44 | GC03M171061 | 3.32 |
| FAM107A | Family With Sequence Similarity 107 Member A | Protein Coding | 36 | GC03M058581 | 3.32 |
| DSG2 | Desmoglein 2 | Protein Coding | 45 | GC18P031498 | 3.32 |
| SLC17A5 | Solute Carrier Family 17 Member 5 | Protein Coding | 44 | GC06M073593 | 3.32 |
| KDM3A | Lysine Demethylase 3A | Protein Coding | 41 | GC02P086440 | 3.31 |
| SMUG1 | Single-Strand-Selective Monofunctional Uracil-DNA Glycosylase 1 | Protein Coding | 42 | GC12M054121 | 3.31 |
| TRPV4 | Transient Receptor Potential Cation Channel Subfamily V Member 4 | Protein Coding | 49 | GC12M109783 | 3.31 |
| ADAMTS9-AS2 | ADAMTS9 Antisense RNA 2 | RNA Gene | 16 | GC03P064671 | 3.31 |
| PARK7 | Parkinsonism Associated Deglycase | Protein Coding | 45 | GC01P007983 | 3.31 |
| GTF2IRD1 | GTF2I Repeat Domain Containing 1 | Protein Coding | 42 | GC07P074461 | 3.31 |
| FRZB | Frizzled Related Protein | Protein Coding | 41 | GC02M182833 | 3.31 |
| UGT3A2 | UDP Glycosyltransferase Family 3 Member A2 | Protein Coding | 37 | GC05M036036 | 3.31 |
| NDST3 | N-Deacetylase And N-Sulfotransferase 3 | Protein Coding | 35 | GC04P118033 | 3.31 |
| FRMPD2 | FERM And PDZ Domain Containing 2 | Protein Coding | 34 | GC10M048150 | 3.31 |
| RPAP1 | RNA Polymerase II Associated Protein 1 | Protein Coding | 33 | GC15M041517 | 3.31 |
| TRAPPC12 | Trafficking Protein Particle Complex 12 | Protein Coding | 37 | GC02P003383 | 3.3 |
| CLSPN | Claspin | Protein Coding | 40 | GC01M035720 | 3.3 |
| BEST1 | Bestrophin 1 | Protein Coding | 43 | GC11P061949 | 3.3 |
| TNKS | Tankyrase | Protein Coding | 43 | GC08P009555 | 3.3 |
| CAV3 | Caveolin 3 | Protein Coding | 43 | GC03P008733 | 3.3 |
| AGTPBP1 | ATP/GTP Binding Protein 1 | Protein Coding | 41 | GC09M085546 | 3.3 |
| ARHGEF10L | Rho Guanine Nucleotide Exchange Factor 10 Like | Protein Coding | 36 | GC01P017520 | 3.3 |
| CCDC93 | Coiled-Coil Domain Containing 93 | Protein Coding | 34 | GC02M117915 | 3.3 |
| ERI2 | ERI1 Exoribonuclease Family Member 2 | Protein Coding | 32 | GC16M020780 | 3.3 |
| RDX | Radixin | Protein Coding | 48 | GC11M109864 | 3.3 |
| CPS1-IT1 | CPS1 Intronic Transcript 1 | RNA Gene | 17 | GC02P210617 | 3.3 |
| GOLM2 | Golgi Membrane Protein 2 | Protein Coding | 27 | GC15P044289 | 3.3 |
| SCN1A | Sodium Voltage-Gated Channel Alpha Subunit 1 | Protein Coding | 47 | GC02M165989 | 3.3 |
| IGSF21 | Immunoglobin Superfamily Member 21 | Protein Coding | 36 | GC01P018107 | 3.3 |
| ERICH1 | Glutamate Rich 1 | Protein Coding | 29 | GC08M000614 | 3.3 |
| PCM1 | Pericentriolar Material 1 | Protein Coding | 41 | GC08P017922 | 3.29 |
| LINC00473 | Long Intergenic Non-Protein Coding RNA 473 | RNA Gene | 20 | GC06M165328 | 3.29 |
| UCN | Urocortin | Protein Coding | 37 | GC02M027308 | 3.29 |
| BLK | BLK Proto-Oncogene, Src Family Tyrosine Kinase | Protein Coding | 51 | GC08P011486 | 3.29 |
| HSD17B3 | Hydroxysteroid 17-Beta Dehydrogenase 3 | Protein Coding | 47 | GC09M096236 | 3.29 |
| LAPTM4B | Lysosomal Protein Transmembrane 4 Beta | Protein Coding | 40 | GC08P097775 | 3.29 |
| CCN6 | Cellular Communication Network Factor 6 | Protein Coding | 33 | GC06P112053 | 3.29 |
| TUSC1 | Tumor Suppressor Candidate 1 | Protein Coding | 28 | GC09M025668 | 3.29 |
| AQP3 | Aquaporin 3 (Gill Blood Group) | Protein Coding | 47 | GC09M033431 | 3.29 |
| ZFYVE26 | Zinc Finger FYVE-Type Containing 26 | Protein Coding | 39 | GC14M067727 | 3.29 |
| APOL1 | Apolipoprotein L1 | Protein Coding | 42 | GC22P036253 | 3.28 |
| FLT3LG | Fms Related Receptor Tyrosine Kinase 3 Ligand | Protein Coding | 40 | GC19P049475 | 3.28 |
| SLC2A2 | Solute Carrier Family 2 Member 2 | Protein Coding | 48 | GC03M170996 | 3.28 |
| FRA3B | Fragile Site, Aphidicolin Type, Common, Fra(3)(P14.2) | Uncategorized | 2 | GC00U921512 | 3.28 |
| AHNAK | AHNAK Nucleoprotein | Protein Coding | 36 | GC11M063360 | 3.28 |
| PDZRN4 | PDZ Domain Containing Ring Finger 4 | Protein Coding | 35 | GC12P041188 | 3.28 |
| AMER1 | APC Membrane Recruitment Protein 1 | Protein Coding | 37 | GC0XM064185 | 3.28 |
| TFAM | Transcription Factor A, Mitochondrial | Protein Coding | 43 | GC10P058385 | 3.28 |
| ITGAE | Integrin Subunit Alpha E | Protein Coding | 39 | GC17M003722 | 3.28 |
| SOX17 | SRY-Box Transcription Factor 17 | Protein Coding | 43 | GC08P054457 | 3.28 |
| MUS81 | MUS81 Structure-Specific Endonuclease Subunit | Protein Coding | 42 | GC11P065883 | 3.28 |
| SFTPB | Surfactant Protein B | Protein Coding | 43 | GC02M085657 | 3.27 |
| KIF26B | Kinesin Family Member 26B | Protein Coding | 36 | GC01P245154 | 3.27 |
| CAV2 | Caveolin 2 | Protein Coding | 42 | GC07P116287 | 3.27 |
| BMP5 | Bone Morphogenetic Protein 5 | Protein Coding | 41 | GC06M055728 | 3.27 |
| USP9X | Ubiquitin Specific Peptidase 9 X-Linked | Protein Coding | 47 | GC0XP041085 | 3.27 |
| ASTN2 | Astrotactin 2 | Protein Coding | 36 | GC09M116425 | 3.27 |
| CNBP | CCHC-Type Zinc Finger Nucleic Acid Binding Protein | Protein Coding | 41 | GC03M129167 | 3.27 |
| RPS7 | Ribosomal Protein S7 | Protein Coding | 42 | GC02P003575 | 3.27 |
| SPACA7 | Sperm Acrosome Associated 7 | Protein Coding | 28 | GC13P112375 | 3.27 |
| GRK5 | G Protein-Coupled Receptor Kinase 5 | Protein Coding | 43 | GC10P119207 | 3.27 |
| CDA | Cytidine Deaminase | Protein Coding | 43 | GC01P020588 | 3.27 |
| RBBP7 | RB Binding Protein 7, Chromatin Remodeling Factor | Protein Coding | 40 | GC0XM016839 | 3.26 |
| WIPF1 | WAS/WASL Interacting Protein Family Member 1 | Protein Coding | 44 | GC02M174559 | 3.26 |
| DPAGT1 | Dolichyl-Phosphate N-Acetylglucosaminephosphotransferase 1 | Protein Coding | 45 | GC11M119096 | 3.26 |
| IL18R1 | Interleukin 18 Receptor 1 | Protein Coding | 43 | GC02P102311 | 3.26 |
| CCL17 | C-C Motif Chemokine Ligand 17 | Protein Coding | 38 | GC16P057400 | 3.26 |
| GAS1 | Growth Arrest Specific 1 | Protein Coding | 41 | GC09M086944 | 3.26 |
| CD1D | CD1d Molecule | Protein Coding | 42 | GC01P158178 | 3.26 |
| MIR20B | MicroRNA 20b | RNA Gene | 15 | GC0XM134217 | 3.26 |
| SPON2 | Spondin 2 | Protein Coding | 39 | GC04M001166 | 3.25 |
| TRAF3IP3 | TRAF3 Interacting Protein 3 | Protein Coding | 35 | GC01P209756 | 3.25 |
| MARCKS | Myristoylated Alanine Rich Protein Kinase C Substrate | Protein Coding | 39 | GC06P113857 | 3.25 |
| NEO1 | Neogenin 1 | Protein Coding | 40 | GC15P073051 | 3.25 |
| MVK | Mevalonate Kinase | Protein Coding | 48 | GC12P109573 | 3.25 |
| LINC00941 | Long Intergenic Non-Protein Coding RNA 941 | RNA Gene | 14 | GC12P030757 | 3.25 |
| ZDHHC7 | Zinc Finger DHHC-Type Palmitoyltransferase 7 | Protein Coding | 36 | GC16M084975 | 3.24 |
| CYSLTR2 | Cysteinyl Leukotriene Receptor 2 | Protein Coding | 47 | GC13P048653 | 3.24 |
| NEUROD1 | Neuronal Differentiation 1 | Protein Coding | 44 | GC02M181673 | 3.24 |
| CORO2B | Coronin 2B | Protein Coding | 37 | GC15P072887 | 3.24 |
| EML2 | EMAP Like 2 | Protein Coding | 35 | GC19M045606 | 3.24 |
| AMER2 | APC Membrane Recruitment Protein 2 | Protein Coding | 31 | GC13M025161 | 3.24 |
| ZSCAN16 | Zinc Finger And SCAN Domain Containing 16 | Protein Coding | 31 | GC06P028824 | 3.24 |
| CFAP77 | Cilia And Flagella Associated Protein 77 | Protein Coding | 24 | GC09P132477 | 3.24 |
| MIB2 | Mindbomb E3 Ubiquitin Protein Ligase 2 | Protein Coding | 37 | GC01P001614 | 3.24 |
| RETREG1 | Reticulophagy Regulator 1 | Protein Coding | 31 | GC05M016472 | 3.24 |
| DOT1L | DOT1 Like Histone Lysine Methyltransferase | Protein Coding | 44 | GC19P002164 | 3.24 |
| TMEM140 | Transmembrane Protein 140 | Protein Coding | 28 | GC07P135148 | 3.23 |
| GMCL2 | Germ Cell-Less 2, Spermatogenesis Associated | Protein Coding | 18 | GC05M178187 | 3.23 |
| MIR572 | MicroRNA 572 | RNA Gene | 14 | GC04P013477 | 3.23 |
| NPBWR2 | Neuropeptides B And W Receptor 2 | Protein Coding | 33 | GC20M064105 | 3.23 |
| ZNF232 | Zinc Finger Protein 232 | Protein Coding | 32 | GC17M005105 | 3.23 |
| ZNF572 | Zinc Finger Protein 572 | Protein Coding | 31 | GC08P124973 | 3.23 |
| NR2F2 | Nuclear Receptor Subfamily 2 Group F Member 2 | Protein Coding | 48 | GC15P096325 | 3.23 |
| ADIPOR2 | Adiponectin Receptor 2 | Protein Coding | 43 | GC12P001670 | 3.23 |
| GRK4 | G Protein-Coupled Receptor Kinase 4 | Protein Coding | 43 | GC04P002963 | 3.22 |
| LRRC4 | Leucine Rich Repeat Containing 4 | Protein Coding | 38 | GC07M128027 | 3.22 |
| TOMM40L | Translocase Of Outer Mitochondrial Membrane 40 Like | Protein Coding | 33 | GC01P161225 | 3.22 |
| ZNF540 | Zinc Finger Protein 540 | Protein Coding | 32 | GC19P037551 | 3.22 |
| ZNF560 | Zinc Finger Protein 560 | Protein Coding | 32 | GC19M009445 | 3.22 |
| ZBTB8B | Zinc Finger And BTB Domain Containing 8B | Protein Coding | 31 | GC01P032466 | 3.22 |
| NSUN2 | NOP2/Sun RNA Methyltransferase 2 | Protein Coding | 42 | GC05M006599 | 3.22 |
| MLC1 | Modulator Of VRAC Current 1 | Protein Coding | 41 | GC22M050059 | 3.22 |
| MT-CO3 | Mitochondrially Encoded Cytochrome C Oxidase III | Protein Coding | 30 | GCMTP009209 | 3.22 |
| NKX2-8 | NK2 Homeobox 8 | Protein Coding | 37 | GC14M036580 | 3.22 |
| BCL9 | BCL9 Transcription Coactivator | Protein Coding | 41 | GC01P147541 | 3.22 |
| P4HB | Prolyl 4-Hydroxylase Subunit Beta | Protein Coding | 49 | GC17M081843 | 3.21 |
| CD300E | CD300e Molecule | Protein Coding | 35 | GC17M074609 | 3.21 |
| ZNF43 | Zinc Finger Protein 43 | Protein Coding | 35 | GC19M024446 | 3.21 |
| ZNF480 | Zinc Finger Protein 480 | Protein Coding | 34 | GC19P052297 | 3.21 |
| LONRF2 | LON Peptidase N-Terminal Domain And Ring Finger 2 | Protein Coding | 33 | GC02M100274 | 3.21 |
| SPNS3 | Sphingolipid Transporter 3 (Putative) | Protein Coding | 33 | GC17P004433 | 3.21 |
| PDILT | Protein Disulfide Isomerase Like, Testis Expressed | Protein Coding | 32 | GC16M020370 | 3.21 |
| WDR49 | WD Repeat Domain 49 | Protein Coding | 32 | GC03M167478 | 3.21 |
| C12orf76 | Chromosome 12 Open Reading Frame 76 | Protein Coding | 31 | GC12M110022 | 3.21 |
| MS4A5 | Membrane Spanning 4-Domains A5 | Protein Coding | 31 | GC11P060447 | 3.21 |
| TMEM164 | Transmembrane Protein 164 | Protein Coding | 29 | GC0XP110002 | 3.21 |
| VRTN | Vertebrae Development Associated | Protein Coding | 29 | GC14P074303 | 3.21 |
| PLPPR2 | Phospholipid Phosphatase Related 2 | Protein Coding | 28 | GC19P011356 | 3.21 |
| SLC66A2 | Solute Carrier Family 66 Member 2 | Protein Coding | 25 | GC18M079903 | 3.21 |
| TEAD1 | TEA Domain Transcription Factor 1 | Protein Coding | 47 | GC11P012674 | 3.21 |
| TGM4 | Transglutaminase 4 | Protein Coding | 39 | GC03P044874 | 3.21 |
| CUL4B | Cullin 4B | Protein Coding | 43 | GC0XM120524 | 3.2 |
| EEF2 | Eukaryotic Translation Elongation Factor 2 | Protein Coding | 48 | GC19M003976 | 3.2 |
| ETV7 | ETS Variant Transcription Factor 7 | Protein Coding | 36 | GC06M042229 | 3.2 |
| CLASRP | CLK4 Associating Serine/Arginine Rich Protein | Protein Coding | 32 | GC19P045039 | 3.2 |
| CRABP1 | Cellular Retinoic Acid Binding Protein 1 | Protein Coding | 41 | GC15P078340 | 3.2 |
| LAMB2 | Laminin Subunit Beta 2 | Protein Coding | 44 | GC03M049121 | 3.2 |
| CIZ1 | CDKN1A Interacting Zinc Finger Protein 1 | Protein Coding | 37 | GC09M128166 | 3.2 |
| AGA | Aspartylglucosaminidase | Protein Coding | 45 | GC04M177430 | 3.2 |
| KAT6B | Lysine Acetyltransferase 6B | Protein Coding | 41 | GC10P074827 | 3.2 |
| ITPR3 | Inositol 1,4,5-Trisphosphate Receptor Type 3 | Protein Coding | 45 | GC06P033620 | 3.2 |
| NUP133 | Nucleoporin 133 | Protein Coding | 40 | GC01M229441 | 3.2 |
| BCL11A | BAF Chromatin Remodeling Complex Subunit BCL11A | Protein Coding | 43 | GC02M060451 | 3.19 |
| IRF3 | Interferon Regulatory Factor 3 | Protein Coding | 47 | GC19M049659 | 3.19 |
| CD69 | CD69 Molecule | Protein Coding | 40 | GC12M013857 | 3.19 |
| EGLN2 | Egl-9 Family Hypoxia Inducible Factor 2 | Protein Coding | 44 | GC19P040799 | 3.19 |
| MT-RNR1 | Mitochondrially Encoded 12S RRNA | RNA Gene | 14 | GCMTP000642 | 3.19 |
| SPN | Sialophorin | Protein Coding | 39 | GC16P029662 | 3.18 |
| GPC1 | Glypican 1 | Protein Coding | 43 | GC02P240435 | 3.18 |
| KPNA2 | Karyopherin Subunit Alpha 2 | Protein Coding | 45 | GC17P068035 | 3.18 |
| CSNK1E | Casein Kinase 1 Epsilon | Protein Coding | 47 | GC22M045469 | 3.18 |
| TRPV1 | Transient Receptor Potential Cation Channel Subfamily V Member 1 | Protein Coding | 46 | GC17M003565 | 3.18 |
| DDX1 | DEAD-Box Helicase 1 | Protein Coding | 43 | GC02P015591 | 3.18 |
| MBNL1 | Muscleblind Like Splicing Regulator 1 | Protein Coding | 39 | GC03P152243 | 3.18 |
| GAS6 | Growth Arrest Specific 6 | Protein Coding | 44 | GC13M113820 | 3.18 |
| ABO | ABO, Alpha 1-3-N-Acetylgalactosaminyltransferase And Alpha 1-3-Galactosyltransferase | Protein Coding | 37 | GC09M133250 | 3.18 |
| CDC37 | Cell Division Cycle 37, HSP90 Cochaperone | Protein Coding | 41 | GC19M010391 | 3.18 |
| TMPRSS12 | Transmembrane Serine Protease 12 | Protein Coding | 35 | GC12P050842 | 3.18 |
| ELOB | Elongin B | Protein Coding | 32 | GC16M002772 | 3.17 |
| LEPQTL1 | Leptin, Serum Levels Of | Genetic Locus | 3 | GC02U903086 | 3.17 |
| RMST | Rhabdomyosarcoma 2 Associated Transcript | RNA Gene | 21 | GC12P097431 | 3.17 |
| CHD8 | Chromodomain Helicase DNA Binding Protein 8 | Protein Coding | 41 | GC14M021385 | 3.17 |
| MTA3 | Metastasis Associated 1 Family Member 3 | Protein Coding | 41 | GC02P042494 | 3.17 |
| CFL1 | Cofilin 1 | Protein Coding | 45 | GC11M065823 | 3.16 |
| PSMA6 | Proteasome 20S Subunit Alpha 6 | Protein Coding | 46 | GC14P035278 | 3.16 |
| CCEPR | Cervical Carcinoma Expressed PCNA Regulatory LncRNA | RNA Gene | 11 | GC10M059174 | 3.16 |
| SNORD138 | Small Nucleolar RNA, C/D Box 138 | RNA Gene | 13 | GC05P086642 | 3.16 |
| SFRP4 | Secreted Frizzled Related Protein 4 | Protein Coding | 43 | GC07M037912 | 3.16 |
| EPG5 | Ectopic P-Granules Autophagy Protein 5 Homolog | Protein Coding | 36 | GC18M045800 | 3.16 |
| KRT6A | Keratin 6A | Protein Coding | 44 | GC12M052488 | 3.16 |
| NLRP1 | NLR Family Pyrin Domain Containing 1 | Protein Coding | 44 | GC17M005499 | 3.16 |
| PINX1 | PIN2 (TERF1) Interacting Telomerase Inhibitor 1 | Protein Coding | 39 | GC08M010726 | 3.16 |
| FGB | Fibrinogen Beta Chain | Protein Coding | 45 | GC04P154564 | 3.16 |
| GP6 | Glycoprotein VI Platelet | Protein Coding | 44 | GC19M055013 | 3.15 |
| H4C1 | H4 Clustered Histone 1 | Protein Coding | 31 | GC06P026041 | 3.15 |
| GP1BA | Glycoprotein Ib Platelet Subunit Alpha | Protein Coding | 45 | GC17P004932 | 3.15 |
| CTCFL | CCCTC-Binding Factor Like | Protein Coding | 39 | GC20M057495 | 3.15 |
| GSTA4 | Glutathione S-Transferase Alpha 4 | Protein Coding | 43 | GC06M052977 | 3.15 |
| CDK9 | Cyclin Dependent Kinase 9 | Protein Coding | 45 | GC09P127814 | 3.15 |
| FAAH | Fatty Acid Amide Hydrolase | Protein Coding | 47 | GC01P046394 | 3.15 |
| LARP1 | La Ribonucleoprotein 1, Translational Regulator | Protein Coding | 38 | GC05P154682 | 3.15 |
| SCN8A | Sodium Voltage-Gated Channel Alpha Subunit 8 | Protein Coding | 47 | GC12P051590 | 3.15 |
| PHF6 | PHD Finger Protein 6 | Protein Coding | 40 | GC0XP134373 | 3.14 |
| INPP5E | Inositol Polyphosphate-5-Phosphatase E | Protein Coding | 41 | GC09M136428 | 3.14 |
| CASK | Calcium/Calmodulin Dependent Serine Protein Kinase | Protein Coding | 48 | GC0XM041514 | 3.14 |
| THBS3 | Thrombospondin 3 | Protein Coding | 41 | GC01M155195 | 3.14 |
| SULT2B1 | Sulfotransferase Family 2B Member 1 | Protein Coding | 45 | GC19P048552 | 3.14 |
| CYBB | Cytochrome B-245 Beta Chain | Protein Coding | 47 | GC0XP037780 | 3.14 |
| MIR7-2 | MicroRNA 7-2 | RNA Gene | 16 | GC15P088611 | 3.14 |
| HECTD4 | HECT Domain E3 Ubiquitin Protein Ligase 4 | Protein Coding | 31 | GC12M112160 | 3.14 |
| PAK4 | P21 (RAC1) Activated Kinase 4 | Protein Coding | 48 | GC19P039125 | 3.14 |
| MIR19B1 | MicroRNA 19b-1 | RNA Gene | 17 | GC13P091435 | 3.13 |
| TSC22D2 | TSC22 Domain Family Member 2 | Protein Coding | 34 | GC03P150408 | 3.13 |
| RPRD1B | Regulation Of Nuclear Pre-MRNA Domain Containing 1B | Protein Coding | 38 | GC20P038033 | 3.13 |
| TLX1 | T Cell Leukemia Homeobox 1 | Protein Coding | 40 | GC10P101130 | 3.13 |
| FOLR2 | Folate Receptor Beta | Protein Coding | 41 | GC11P072216 | 3.13 |
| CNC2 | Carney Complex Type 2, Multiple Neoplasia And Lentiginosis | Genetic Locus | 4 | GC02U990267 | 3.13 |
| NFATC2 | Nuclear Factor Of Activated T Cells 2 | Protein Coding | 45 | GC20M051386 | 3.13 |
| FAM189B | Family With Sequence Similarity 189 Member B | Protein Coding | 32 | GC01M155248 | 3.12 |
| ANO9 | Anoctamin 9 | Protein Coding | 36 | GC11M000515 | 3.12 |
| PKN1 | Protein Kinase N1 | Protein Coding | 45 | GC19P014433 | 3.12 |
| WDR11 | WD Repeat Domain 11 | Protein Coding | 37 | GC10P120851 | 3.12 |
| DEFB4A | Defensin Beta 4A | Protein Coding | 37 | GC08P007895 | 3.12 |
| MT-ND6 | Mitochondrially Encoded NADH:Ubiquinone Oxidoreductase Core Subunit 6 | Protein Coding | 32 | GCMTM014151 | 3.12 |
| SURF1 | SURF1 Cytochrome C Oxidase Assembly Factor | Protein Coding | 43 | GC09M133351 | 3.12 |
| LRBA | LPS Responsive Beige-Like Anchor Protein | Protein Coding | 41 | GC04M150264 | 3.12 |
| PLCD1 | Phospholipase C Delta 1 | Protein Coding | 48 | GC03M038008 | 3.12 |
| ABCC5 | ATP Binding Cassette Subfamily C Member 5 | Protein Coding | 43 | GC03M183919 | 3.12 |
| SEMA3F | Semaphorin 3F | Protein Coding | 41 | GC03P050167 | 3.12 |
| ATP2A3 | ATPase Sarcoplasmic/Endoplasmic Reticulum Ca2+ Transporting 3 | Protein Coding | 44 | GC17M003923 | 3.11 |
| LINC01589 | Long Intergenic Non-Protein Coding RNA 1589 | RNA Gene | 13 | GC22M045687 | 3.11 |
| FRS2 | Fibroblast Growth Factor Receptor Substrate 2 | Protein Coding | 41 | GC12P069471 | 3.11 |
| EIF3M | Eukaryotic Translation Initiation Factor 3 Subunit M | Protein Coding | 37 | GC11P032564 | 3.11 |
| SLC1A5 | Solute Carrier Family 1 Member 5 | Protein Coding | 43 | GC19M046760 | 3.11 |
| FAM3D-AS1 | FAM3D Antisense RNA 1 | RNA Gene | 10 | GC03P058607 | 3.11 |
| GSPT2 | G1 To S Phase Transition 2 | Protein Coding | 37 | GC0XP051743 | 3.1 |
| AGGF1 | Angiogenic Factor With G-Patch And FHA Domains 1 | Protein Coding | 41 | GC05P077029 | 3.1 |
| PVR | PVR Cell Adhesion Molecule | Protein Coding | 44 | GC19P044644 | 3.1 |
| GNA13 | G Protein Subunit Alpha 13 | Protein Coding | 44 | GC17M065009 | 3.1 |
| ICOS | Inducible T Cell Costimulator | Protein Coding | 43 | GC02P203937 | 3.1 |
| SNRNP25 | Small Nuclear Ribonucleoprotein U11/U12 Subunit 25 | Protein Coding | 34 | GC16P000053 | 3.1 |
| AQP5 | Aquaporin 5 | Protein Coding | 45 | GC12P049961 | 3.09 |
| HOXB7 | Homeobox B7 | Protein Coding | 40 | GC17M048607 | 3.09 |
| RORA | RAR Related Orphan Receptor A | Protein Coding | 48 | GC15M060488 | 3.09 |
| GOLPH3 | Golgi Phosphoprotein 3 | Protein Coding | 39 | GC05M032124 | 3.09 |
| MAP1LC3B | Microtubule Associated Protein 1 Light Chain 3 Beta | Protein Coding | 43 | GC16P087384 | 3.09 |
| PLA2G6 | Phospholipase A2 Group VI | Protein Coding | 47 | GC22M046185 | 3.09 |
| MIR520A | MicroRNA 520a | RNA Gene | 18 | GC19P053690 | 3.09 |
| SUMO1P3 | SUMO1 Pseudogene 3 | Pseudogene | 11 | GC01P160317 | 3.08 |
| MC4R | Melanocortin 4 Receptor | Protein Coding | 45 | GC18M060371 | 3.08 |
| CA12 | Carbonic Anhydrase 12 | Protein Coding | 47 | GC15M063321 | 3.08 |
| CHRM3 | Cholinergic Receptor Muscarinic 3 | Protein Coding | 48 | GC01P239386 | 3.08 |
| CRTC3 | CREB Regulated Transcription Coactivator 3 | Protein Coding | 39 | GC15P090529 | 3.08 |
| NCBP1 | Nuclear Cap Binding Protein Subunit 1 | Protein Coding | 39 | GC09P097633 | 3.08 |
| USP6 | Ubiquitin Specific Peptidase 6 | Protein Coding | 40 | GC17P005116 | 3.08 |
| DKK4 | Dickkopf WNT Signaling Pathway Inhibitor 4 | Protein Coding | 38 | GC08M042373 | 3.08 |
| FADS2 | Fatty Acid Desaturase 2 | Protein Coding | 44 | GC11P061792 | 3.07 |
| TRIM21 | Tripartite Motif Containing 21 | Protein Coding | 42 | GC11M004384 | 3.07 |
| SDC2 | Syndecan 2 | Protein Coding | 45 | GC08P096494 | 3.07 |
| CFHR5 | Complement Factor H Related 5 | Protein Coding | 40 | GC01P196977 | 3.07 |
| CD58 | CD58 Molecule | Protein Coding | 40 | GC01M116514 | 3.07 |
| C1QBP | Complement C1q Binding Protein | Protein Coding | 45 | GC17M005432 | 3.07 |
| ISG15 | ISG15 Ubiquitin Like Modifier | Protein Coding | 47 | GC01P001001 | 3.07 |
| ZFP57 | ZFP57 Zinc Finger Protein | Protein Coding | 39 | GC06M029672 | 3.06 |
| SLC22A2 | Solute Carrier Family 22 Member 2 | Protein Coding | 44 | GC06M160173 | 3.06 |
| DCTN1 | Dynactin Subunit 1 | Protein Coding | 46 | GC02M074361 | 3.06 |
| SERPINE2 | Serpin Family E Member 2 | Protein Coding | 41 | GC02M223975 | 3.06 |
| LACC1 | Laccase Domain Containing 1 | Protein Coding | 35 | GC13P043879 | 3.06 |
| CLDND1 | Claudin Domain Containing 1 | Protein Coding | 36 | GC03M098497 | 3.06 |
| MTSS1 | MTSS I-BAR Domain Containing 1 | Protein Coding | 38 | GC08M124550 | 3.06 |
| ENPEP | Glutamyl Aminopeptidase | Protein Coding | 44 | GC04P110365 | 3.06 |
| PRKG1 | Protein Kinase CGMP-Dependent 1 | Protein Coding | 51 | GC10P050991 | 3.06 |
| CTIF | Cap Binding Complex Dependent Translation Initiation Factor | Protein Coding | 32 | GC18P048539 | 3.06 |
| MIR194-1 | MicroRNA 194-1 | RNA Gene | 16 | GC01M220118 | 3.06 |
| CANX | Calnexin | Protein Coding | 44 | GC05P179678 | 3.06 |
| SUCLA2 | Succinate-CoA Ligase ADP-Forming Subunit Beta | Protein Coding | 46 | GC13M047745 | 3.06 |
| SLAMF1 | Signaling Lymphocytic Activation Molecule Family Member 1 | Protein Coding | 40 | GC01M160608 | 3.06 |
| CCN3 | Cellular Communication Network Factor 3 | Protein Coding | 33 | GC08P119416 | 3.05 |
| SH3KBP1 | SH3 Domain Containing Kinase Binding Protein 1 | Protein Coding | 41 | GC0XM019552 | 3.05 |
| HTR3A | 5-Hydroxytryptamine Receptor 3A | Protein Coding | 45 | GC11P113974 | 3.05 |
| PRKAB1 | Protein Kinase AMP-Activated Non-Catalytic Subunit Beta 1 | Protein Coding | 47 | GC12P119632 | 3.05 |
| ATG7 | Autophagy Related 7 | Protein Coding | 43 | GC03P011273 | 3.05 |
| BAMBI | BMP And Activin Membrane Bound Inhibitor | Protein Coding | 43 | GC10P028685 | 3.05 |
| MATN3 | Matrilin 3 | Protein Coding | 43 | GC02M019992 | 3.05 |
| DLG1 | Discs Large MAGUK Scaffold Protein 1 | Protein Coding | 43 | GC03M197042 | 3.05 |
| CRB1 | Crumbs Cell Polarity Complex Component 1 | Protein Coding | 43 | GC01P197170 | 3.05 |
| MAFB | MAF BZIP Transcription Factor B | Protein Coding | 43 | GC20M040685 | 3.05 |
| ITGAX | Integrin Subunit Alpha X | Protein Coding | 44 | GC16P031570 | 3.05 |
| CARS1 | Cysteinyl-TRNA Synthetase 1 | Protein Coding | 32 | GC11M003000 | 3.04 |
| EPHB3 | EPH Receptor B3 | Protein Coding | 44 | GC03P184561 | 3.04 |
| BOK | BCL2 Family Apoptosis Regulator BOK | Protein Coding | 40 | GC02P241558 | 3.04 |
| PIK3C3 | Phosphatidylinositol 3-Kinase Catalytic Subunit Type 3 | Protein Coding | 49 | GC18P041955 | 3.04 |
| RBM39 | RNA Binding Motif Protein 39 | Protein Coding | 37 | GC20M035703 | 3.04 |
| MIR551A | MicroRNA 551a | RNA Gene | 18 | GC01M003560 | 3.04 |
| CD74 | CD74 Molecule | Protein Coding | 43 | GC05M150378 | 3.04 |
| EMD | Emerin | Protein Coding | 45 | GC0XP154379 | 3.03 |
| CENPF | Centromere Protein F | Protein Coding | 42 | GC01P214603 | 3.03 |
| CBLB | Cbl Proto-Oncogene B | Protein Coding | 44 | GC03M105655 | 3.03 |
| DACH1 | Dachshund Family Transcription Factor 1 | Protein Coding | 39 | GC13M071437 | 3.03 |
| PC | Pyruvate Carboxylase | Protein Coding | 47 | GC11M066848 | 3.03 |
| HLA-DRA | Major Histocompatibility Complex, Class II, DR Alpha | Protein Coding | 47 | GC06P032439 | 3.03 |
| HDAC7 | Histone Deacetylase 7 | Protein Coding | 45 | GC12M047782 | 3.03 |
| HLA-E | Major Histocompatibility Complex, Class I, E | Protein Coding | 41 | GC06P047281 | 3.02 |
| SPTLC1 | Serine Palmitoyltransferase Long Chain Base Subunit 1 | Protein Coding | 47 | GC09M092002 | 3.02 |
| RBM38 | RNA Binding Motif Protein 38 | Protein Coding | 37 | GC20P057391 | 3.02 |
| FOXJ1 | Forkhead Box J1 | Protein Coding | 36 | GC17M076136 | 3.02 |
| DNM1L | Dynamin 1 Like | Protein Coding | 47 | GC12P032679 | 3.02 |
| KIF4A | Kinesin Family Member 4A | Protein Coding | 40 | GC0XP070290 | 3.02 |
| RAB11B | RAB11B, Member RAS Oncogene Family | Protein Coding | 42 | GC19P008393 | 3.02 |
| TPP1 | Tripeptidyl Peptidase 1 | Protein Coding | 43 | GC11M006616 | 3.01 |
| SRARP | Steroid Receptor Associated And Regulated Protein | Protein Coding | 25 | GC01P016005 | 3.01 |
| UBE2N | Ubiquitin Conjugating Enzyme E2 N | Protein Coding | 47 | GC12M093406 | 3.01 |
| MIR26A2 | MicroRNA 26a-2 | RNA Gene | 20 | GC12M057824 | 3.01 |
| CRY2 | Cryptochrome Circadian Regulator 2 | Protein Coding | 41 | GC11P045986 | 3.01 |
| NR2E3 | Nuclear Receptor Subfamily 2 Group E Member 3 | Protein Coding | 41 | GC15P071792 | 3.01 |
| CSNK2A2 | Casein Kinase 2 Alpha 2 | Protein Coding | 47 | GC16M058157 | 3.01 |
| MIR662 | MicroRNA 662 | RNA Gene | 15 | GC16P001410 | 3.01 |
| CCKAR | Cholecystokinin A Receptor | Protein Coding | 45 | GC04M026483 | 3.01 |
| RAB7A | RAB7A, Member RAS Oncogene Family | Protein Coding | 48 | GC03P128749 | 3.01 |
| CYP2B6 | Cytochrome P450 Family 2 Subfamily B Member 6 | Protein Coding | 47 | GC19P040991 | 3.01 |
| ABCB6 | ATP Binding Cassette Subfamily B Member 6 (Langereis Blood Group) | Protein Coding | 46 | GC02M219209 | 3.01 |
| NONO | Non-POU Domain Containing Octamer Binding | Protein Coding | 44 | GC0XP071283 | 3.01 |
| PITPNM3 | PITPNM Family Member 3 | Protein Coding | 39 | GC17M006451 | 3.01 |
| DUSP10 | Dual Specificity Phosphatase 10 | Protein Coding | 44 | GC01M221701 | 3.01 |
| SIRT7 | Sirtuin 7 | Protein Coding | 41 | GC17M081911 | 3 |
| SMARCC2 | SWI/SNF Related, Matrix Associated, Actin Dependent Regulator Of Chromatin Subfamily C Member 2 | Protein Coding | 44 | GC12M056161 | 3 |
| DGKE | Diacylglycerol Kinase Epsilon | Protein Coding | 48 | GC17P056834 | 3 |
| IL17RA | Interleukin 17 Receptor A | Protein Coding | 44 | GC22P017086 | 3 |
| FXYD5 | FXYD Domain Containing Ion Transport Regulator 5 | Protein Coding | 36 | GC19P035154 | 3 |
| TCL1A | TCL1 Family AKT Coactivator A | Protein Coding | 43 | GC14M095709 | 3 |
| MZF1 | Myeloid Zinc Finger 1 | Protein Coding | 35 | GC19M058609 | 3 |
| GLS2 | Glutaminase 2 | Protein Coding | 41 | GC12M056470 | 3 |
| PLEC | Plectin | Protein Coding | 42 | GC08M143916 | 3 |
| SART3 | Spliceosome Associated Factor 3, U4/U6 Recycling Protein | Protein Coding | 36 | GC12M108522 | 2.99 |
| PYCARD | PYD And CARD Domain Containing | Protein Coding | 43 | GC16M031201 | 2.99 |
| AQP2 | Aquaporin 2 | Protein Coding | 46 | GC12P049950 | 2.99 |
| MGLL | Monoglyceride Lipase | Protein Coding | 45 | GC03M127689 | 2.99 |
| SPRY2 | Sprouty RTK Signaling Antagonist 2 | Protein Coding | 46 | GC13M080335 | 2.99 |
| ENDOG | Endonuclease G | Protein Coding | 43 | GC09P128818 | 2.99 |
| NAV2 | Neuron Navigator 2 | Protein Coding | 37 | GC11P019345 | 2.98 |
| CKB | Creatine Kinase B | Protein Coding | 45 | GC14M103519 | 2.98 |
| CX3CL1 | C-X3-C Motif Chemokine Ligand 1 | Protein Coding | 42 | GC16P057372 | 2.98 |
| SHROOM2 | Shroom Family Member 2 | Protein Coding | 35 | GC0XP009786 | 2.98 |
| HCK | HCK Proto-Oncogene, Src Family Tyrosine Kinase | Protein Coding | 49 | GC20P032052 | 2.98 |
| CAMK2G | Calcium/Calmodulin Dependent Protein Kinase II Gamma | Protein Coding | 47 | GC10M073812 | 2.97 |
| STAG2 | Stromal Antigen 2 | Protein Coding | 44 | GC0XP123960 | 2.97 |
| MSX2 | Msh Homeobox 2 | Protein Coding | 47 | GC05P174724 | 2.97 |
| ANGPTL4 | Angiopoietin Like 4 | Protein Coding | 45 | GC19P008363 | 2.97 |
| ACP5 | Acid Phosphatase 5, Tartrate Resistant | Protein Coding | 47 | GC19M011574 | 2.97 |
| UNC5A | Unc-5 Netrin Receptor A | Protein Coding | 38 | GC05P176813 | 2.97 |
| DDB1 | Damage Specific DNA Binding Protein 1 | Protein Coding | 41 | GC11M061563 | 2.97 |
| F11 | Coagulation Factor XI | Protein Coding | 45 | GC04P186265 | 2.97 |
| HPSE2 | Heparanase 2 (Inactive) | Protein Coding | 41 | GC10M098457 | 2.97 |
| OGFR | Opioid Growth Factor Receptor | Protein Coding | 37 | GC20P062804 | 2.97 |
| PTBP1 | Polypyrimidine Tract Binding Protein 1 | Protein Coding | 41 | GC19P000797 | 2.97 |
| SNHG14 | Small Nucleolar RNA Host Gene 14 | RNA Gene | 15 | GC15P024850 | 2.97 |
| PER3 | Period Circadian Regulator 3 | Protein Coding | 43 | GC01P007785 | 2.96 |
| PTGER3 | Prostaglandin E Receptor 3 | Protein Coding | 46 | GC01M070852 | 2.96 |
| GREB1L | GREB1 Like Retinoic Acid Receptor Coactivator | Protein Coding | 35 | GC18P021242 | 2.96 |
| TFEB | Transcription Factor EB | Protein Coding | 42 | GC06M042295 | 2.96 |
| SLC7A7 | Solute Carrier Family 7 Member 7 | Protein Coding | 47 | GC14M022773 | 2.96 |
| EPHX2 | Epoxide Hydrolase 2 | Protein Coding | 47 | GC08P027490 | 2.96 |
| FAAP24 | FA Core Complex Associated Protein 24 | Protein Coding | 30 | GC19P032975 | 2.96 |
| KRT6B | Keratin 6B | Protein Coding | 41 | GC12M052446 | 2.96 |
| ING4 | Inhibitor Of Growth Family Member 4 | Protein Coding | 36 | GC12M006650 | 2.95 |
| CTNNBIP1 | Catenin Beta Interacting Protein 1 | Protein Coding | 41 | GC01M009848 | 2.95 |
| PATZ1 | POZ/BTB And AT Hook Containing Zinc Finger 1 | Protein Coding | 38 | GC22M031325 | 2.95 |
| HAVCR1 | Hepatitis A Virus Cellular Receptor 1 | Protein Coding | 41 | GC05M157028 | 2.95 |
| AMFR | Autocrine Motility Factor Receptor | Protein Coding | 43 | GC16M056361 | 2.95 |
| HAGLROS | HAGLR Opposite Strand LncRNA | RNA Gene | 14 | GC02P176177 | 2.95 |
| GFRA1 | GDNF Family Receptor Alpha 1 | Protein Coding | 44 | GC10M116056 | 2.94 |
| GNAI3 | G Protein Subunit Alpha I3 | Protein Coding | 46 | GC01P109548 | 2.94 |
| GALK1 | Galactokinase 1 | Protein Coding | 48 | GC17M075751 | 2.94 |
| DNASE1 | Deoxyribonuclease 1 | Protein Coding | 41 | GC16P003611 | 2.94 |
| MIR217 | MicroRNA 217 | RNA Gene | 18 | GC02M055982 | 2.94 |
| CPT2 | Carnitine Palmitoyltransferase 2 | Protein Coding | 48 | GC01P053196 | 2.93 |
| CYBA | Cytochrome B-245 Alpha Chain | Protein Coding | 47 | GC16M088643 | 2.93 |
| MT-ND3 | Mitochondrially Encoded NADH:Ubiquinone Oxidoreductase Core Subunit 3 | Protein Coding | 31 | GCMTP010061 | 2.93 |
| LGI1 | Leucine Rich Glioma Inactivated 1 | Protein Coding | 43 | GC10P093757 | 2.93 |
| SAMHD1 | SAM And HD Domain Containing Deoxynucleoside Triphosphate Triphosphohydrolase 1 | Protein Coding | 43 | GC20M036890 | 2.93 |
| S100A11 | S100 Calcium Binding Protein A11 | Protein Coding | 41 | GC01M152032 | 2.93 |
| TGFBI | Transforming Growth Factor Beta Induced | Protein Coding | 45 | GC05P136027 | 2.93 |
| ST13 | ST13 Hsp70 Interacting Protein | Protein Coding | 38 | GC22M045406 | 2.93 |
| INF2 | Inverted Formin 2 | Protein Coding | 40 | GC14P104788 | 2.92 |
| BRAP | BRCA1 Associated Protein | Protein Coding | 41 | GC12M111642 | 2.92 |
| CDC45 | Cell Division Cycle 45 | Protein Coding | 44 | GC22P019479 | 2.92 |
| GSDMA | Gasdermin A | Protein Coding | 36 | GC17P039962 | 2.92 |
| CTBP2 | C-Terminal Binding Protein 2 | Protein Coding | 44 | GC10M124984 | 2.92 |
| LOXL4 | Lysyl Oxidase Like 4 | Protein Coding | 42 | GC10M098247 | 2.92 |
| RAB35 | RAB35, Member RAS Oncogene Family | Protein Coding | 41 | GC12M120096 | 2.92 |
| HDAC8 | Histone Deacetylase 8 | Protein Coding | 47 | GC0XM072329 | 2.92 |
| NPAS2 | Neuronal PAS Domain Protein 2 | Protein Coding | 40 | GC02P100803 | 2.92 |
| PDHA1 | Pyruvate Dehydrogenase E1 Subunit Alpha 1 | Protein Coding | 48 | GC0XP019343 | 2.92 |
| SAGE1 | Sarcoma Antigen 1 | Protein Coding | 31 | GC0XP135889 | 2.92 |
| PLXDC1 | Plexin Domain Containing 1 | Protein Coding | 37 | GC17M039063 | 2.91 |
| FXR1 | FMR1 Autosomal Homolog 1 | Protein Coding | 42 | GC03P180868 | 2.91 |
| ADD1 | Adducin 1 | Protein Coding | 44 | GC04P002855 | 2.91 |
| E2F7 | E2F Transcription Factor 7 | Protein Coding | 37 | GC12M077021 | 2.91 |
| OGN | Osteoglycin | Protein Coding | 39 | GC09M092383 | 2.91 |
| LILRB1 | Leukocyte Immunoglobulin Like Receptor B1 | Protein Coding | 43 | GC19P055408 | 2.91 |
| CSNK2B | Casein Kinase 2 Beta | Protein Coding | 47 | GC06P047308 | 2.91 |
| FAT2 | FAT Atypical Cadherin 2 | Protein Coding | 36 | GC05M151504 | 2.91 |
| ATIC | 5-Aminoimidazole-4-Carboxamide Ribonucleotide Formyltransferase/IMP Cyclohydrolase | Protein Coding | 45 | GC02P215311 | 2.9 |
| SFTPD | Surfactant Protein D | Protein Coding | 44 | GC10M079937 | 2.9 |
| RAD18 | RAD18 E3 Ubiquitin Protein Ligase | Protein Coding | 41 | GC03M008775 | 2.9 |
| IGFBP4 | Insulin Like Growth Factor Binding Protein 4 | Protein Coding | 43 | GC17P040443 | 2.9 |
| ACADVL | Acyl-CoA Dehydrogenase Very Long Chain | Protein Coding | 45 | GC17P007219 | 2.9 |
| SPRR3 | Small Proline Rich Protein 3 | Protein Coding | 37 | GC01P153001 | 2.9 |
| NEK6 | NIMA Related Kinase 6 | Protein Coding | 39 | GC09P124259 | 2.9 |
| SEMA5A | Semaphorin 5A | Protein Coding | 41 | GC05M009036 | 2.9 |
| ARHGEF12 | Rho Guanine Nucleotide Exchange Factor 12 | Protein Coding | 43 | GC11P120336 | 2.9 |
| JMJD1C | Jumonji Domain Containing 1C | Protein Coding | 40 | GC10M063167 | 2.89 |
| EIF4B | Eukaryotic Translation Initiation Factor 4B | Protein Coding | 41 | GC12P053006 | 2.89 |
| ZWILCH | Zwilch Kinetochore Protein | Protein Coding | 35 | GC15P066504 | 2.89 |
| MIR635 | MicroRNA 635 | RNA Gene | 14 | GC17M068424 | 2.89 |
| PGK1 | Phosphoglycerate Kinase 1 | Protein Coding | 48 | GC0XP077928 | 2.88 |
| CCL19 | C-C Motif Chemokine Ligand 19 | Protein Coding | 41 | GC09M034692 | 2.88 |
| ITGB6 | Integrin Subunit Beta 6 | Protein Coding | 47 | GC02M160099 | 2.88 |
| GPR143 | G Protein-Coupled Receptor 143 | Protein Coding | 41 | GC0XM009725 | 2.88 |
| ZNF750 | Zinc Finger Protein 750 | Protein Coding | 36 | GC17M082829 | 2.88 |
| SOD3 | Superoxide Dismutase 3 | Protein Coding | 40 | GC04P024798 | 2.88 |
| SOX7 | SRY-Box Transcription Factor 7 | Protein Coding | 35 | GC08M010723 | 2.88 |
| MTM1 | Myotubularin 1 | Protein Coding | 44 | GC0XP150562 | 2.88 |
| RERE | Arginine-Glutamic Acid Dipeptide Repeats | Protein Coding | 41 | GC01M008364 | 2.88 |
| AGRN | Agrin | Protein Coding | 44 | GC01P001020 | 2.88 |
| GIPC1 | GIPC PDZ Domain Containing Family Member 1 | Protein Coding | 41 | GC19M014450 | 2.88 |
| SCD | Stearoyl-CoA Desaturase | Protein Coding | 48 | GC10P100347 | 2.88 |
| GRM7 | Glutamate Metabotropic Receptor 7 | Protein Coding | 44 | GC03P006770 | 2.87 |
| CD47 | CD47 Molecule | Protein Coding | 43 | GC03M108043 | 2.87 |
| TRIM33 | Tripartite Motif Containing 33 | Protein Coding | 44 | GC01M114392 | 2.87 |
| LATS2 | Large Tumor Suppressor Kinase 2 | Protein Coding | 44 | GC13M020973 | 2.87 |
| CSPG4 | Chondroitin Sulfate Proteoglycan 4 | Protein Coding | 43 | GC15M075674 | 2.87 |
| OSMR | Oncostatin M Receptor | Protein Coding | 45 | GC05P038845 | 2.87 |
| ANOS1 | Anosmin 1 | Protein Coding | 36 | GC0XM008528 | 2.87 |
| JUNB | JunB Proto-Oncogene, AP-1 Transcription Factor Subunit | Protein Coding | 41 | GC19P012791 | 2.86 |
| CRACD | Capping Protein Inhibiting Regulator Of Actin Dynamics | Protein Coding | 24 | GC04P056050 | 2.86 |
| SIRT2 | Sirtuin 2 | Protein Coding | 48 | GC19M038878 | 2.86 |
| RSPO2 | R-Spondin 2 | Protein Coding | 43 | GC08M107899 | 2.86 |
| UBR4 | Ubiquitin Protein Ligase E3 Component N-Recognin 4 | Protein Coding | 39 | GC01M019074 | 2.86 |
| SYNJ2 | Synaptojanin 2 | Protein Coding | 40 | GC06P157981 | 2.86 |
| CCDC7 | Coiled-Coil Domain Containing 7 | Protein Coding | 31 | GC10P032454 | 2.86 |
| SPOCK1 | SPARC (Osteonectin), Cwcv And Kazal Like Domains Proteoglycan 1 | Protein Coding | 39 | GC05M136975 | 2.86 |
| NOB1 | NIN1 (RPN12) Binding Protein 1 Homolog | Protein Coding | 37 | GC16M069747 | 2.86 |
| NME2 | NME/NM23 Nucleoside Diphosphate Kinase 2 | Protein Coding | 46 | GC17P051165 | 2.85 |
| SNHG8 | Small Nucleolar RNA Host Gene 8 | RNA Gene | 18 | GC04P118278 | 2.85 |
| BLNK | B Cell Linker | Protein Coding | 47 | GC10M096198 | 2.85 |
| MAGEA6 | MAGE Family Member A6 | Protein Coding | 35 | GC0XM152766 | 2.85 |
| GABRA1 | Gamma-Aminobutyric Acid Type A Receptor Subunit Alpha1 | Protein Coding | 46 | GC05P161847 | 2.85 |
| XPO5 | Exportin 5 | Protein Coding | 40 | GC06M043522 | 2.85 |
| JAZF1 | JAZF Zinc Finger 1 | Protein Coding | 39 | GC07M027830 | 2.85 |
| TOX | Thymocyte Selection Associated High Mobility Group Box | Protein Coding | 40 | GC08M058791 | 2.85 |
| LATS1 | Large Tumor Suppressor Kinase 1 | Protein Coding | 44 | GC06M149658 | 2.84 |
| H19-ICR | H19/IGF2 Imprinting Control Region | Biological Region | 5 | GC11P001999 | 2.84 |
| ABL2 | ABL Proto-Oncogene 2, Non-Receptor Tyrosine Kinase | Protein Coding | 45 | GC01M179108 | 2.84 |
| PTGDR | Prostaglandin D2 Receptor | Protein Coding | 47 | GC14P052267 | 2.84 |
| RECQL5 | RecQ Like Helicase 5 | Protein Coding | 39 | GC17M075626 | 2.84 |
| TFR2 | Transferrin Receptor 2 | Protein Coding | 44 | GC07M100620 | 2.83 |
| PRKAG2 | Protein Kinase AMP-Activated Non-Catalytic Subunit Gamma 2 | Protein Coding | 50 | GC07M151556 | 2.83 |
| CD2AP | CD2 Associated Protein | Protein Coding | 43 | GC06P047777 | 2.83 |
| PTGER1 | Prostaglandin E Receptor 1 | Protein Coding | 41 | GC19M014444 | 2.83 |
| IQCB1 | IQ Motif Containing B1 | Protein Coding | 41 | GC03M121769 | 2.83 |
| MMP15 | Matrix Metallopeptidase 15 | Protein Coding | 45 | GC16P058025 | 2.83 |
| CFP | Complement Factor Properdin | Protein Coding | 43 | GC0XM047624 | 2.83 |
| CLMP | CXADR Like Membrane Protein | Protein Coding | 40 | GC11M123069 | 2.83 |
| MRGBP | MRG Domain Binding Protein | Protein Coding | 33 | GC20P062899 | 2.83 |
| MRTFA | Myocardin Related Transcription Factor A | Protein Coding | 34 | GC22M045655 | 2.83 |
| SH3TC2 | SH3 Domain And Tetratricopeptide Repeats 2 | Protein Coding | 38 | GC05M148923 | 2.82 |
| HLCS | Holocarboxylase Synthetase | Protein Coding | 43 | GC21M036750 | 2.82 |
| ATN1 | Atrophin 1 | Protein Coding | 43 | GC12P008222 | 2.82 |
| LTBP1 | Latent Transforming Growth Factor Beta Binding Protein 1 | Protein Coding | 43 | GC02P032915 | 2.82 |
| ST8SIA2 | ST8 Alpha-N-Acetyl-Neuraminide Alpha-2,8-Sialyltransferase 2 | Protein Coding | 41 | GC15P092393 | 2.82 |
| UBE2D1 | Ubiquitin Conjugating Enzyme E2 D1 | Protein Coding | 45 | GC10P058334 | 2.82 |
| KARS1 | Lysyl-TRNA Synthetase 1 | Protein Coding | 38 | GC16M075628 | 2.82 |
| MIR1-2 | MicroRNA 1-2 | RNA Gene | 17 | GC18M021828 | 2.82 |
| ARHGDIA | Rho GDP Dissociation Inhibitor Alpha | Protein Coding | 47 | GC17M081867 | 2.82 |
| PROKR2 | Prokineticin Receptor 2 | Protein Coding | 41 | GC20M005303 | 2.81 |
| LAMTOR5 | Late Endosomal/Lysosomal Adaptor, MAPK And MTOR Activator 5 | Protein Coding | 36 | GC01M110401 | 2.81 |
| BRD2 | Bromodomain Containing 2 | Protein Coding | 44 | GC06P047345 | 2.81 |
| PTBP3 | Polypyrimidine Tract Binding Protein 3 | Protein Coding | 35 | GC09M112217 | 2.81 |
| PYY | Peptide YY | Protein Coding | 42 | GC17M043952 | 2.81 |
| CAPN2 | Calpain 2 | Protein Coding | 47 | GC01P223701 | 2.81 |
| HTRA3 | HtrA Serine Peptidase 3 | Protein Coding | 37 | GC04P008269 | 2.81 |
| PTX3 | Pentraxin 3 | Protein Coding | 41 | GC03P157436 | 2.81 |
| SPRED1 | Sprouty Related EVH1 Domain Containing 1 | Protein Coding | 42 | GC15P038252 | 2.81 |
| MGAT4A | Alpha-1,3-Mannosyl-Glycoprotein 4-Beta-N-Acetylglucosaminyltransferase A | Protein Coding | 38 | GC02M098619 | 2.81 |
| CRAT | Carnitine O-Acetyltransferase | Protein Coding | 44 | GC09M129094 | 2.8 |
| POMGNT2 | Protein O-Linked Mannose N-Acetylglucosaminyltransferase 2 (Beta 1,4-) | Protein Coding | 36 | GC03M043121 | 2.8 |
| ACTL6A | Actin Like 6A | Protein Coding | 39 | GC03P179562 | 2.8 |
| ME2 | Malic Enzyme 2 | Protein Coding | 44 | GC18P050879 | 2.8 |
| TBX4 | T-Box Transcription Factor 4 | Protein Coding | 41 | GC17P061451 | 2.8 |
| ACKR4 | Atypical Chemokine Receptor 4 | Protein Coding | 35 | GC03P132597 | 2.8 |
| ANKRD26 | Ankyrin Repeat Domain 26 | Protein Coding | 39 | GC10M026938 | 2.8 |
| DPPA2 | Developmental Pluripotency Associated 2 | Protein Coding | 36 | GC03M109293 | 2.8 |
| SIK3 | SIK Family Kinase 3 | Protein Coding | 41 | GC11M116843 | 2.8 |
| BAGE | B Melanoma Antigen | Protein Coding | 21 | GC21U900396 | 2.8 |
| DBN1 | Drebrin 1 | Protein Coding | 39 | GC05M177456 | 2.79 |
| USP1 | Ubiquitin Specific Peptidase 1 | Protein Coding | 44 | GC01P062436 | 2.79 |
| WDR54 | WD Repeat Domain 54 | Protein Coding | 32 | GC02P074422 | 2.79 |
| ANXA4 | Annexin A4 | Protein Coding | 44 | GC02P069644 | 2.79 |
| VPS13B | Vacuolar Protein Sorting 13 Homolog B | Protein Coding | 39 | GC08P099011 | 2.78 |
| CITED2 | Cbp/P300 Interacting Transactivator With Glu/Asp Rich Carboxy-Terminal Domain 2 | Protein Coding | 44 | GC06M139371 | 2.78 |
| LGMN | Legumain | Protein Coding | 42 | GC14M092703 | 2.78 |
| PEPD | Peptidase D | Protein Coding | 45 | GC19M033386 | 2.78 |
| C3orf35 | Chromosome 3 Open Reading Frame 35 | Protein Coding | 29 | GC03P037382 | 2.78 |
| BNIP3L | BCL2 Interacting Protein 3 Like | Protein Coding | 42 | GC08P026296 | 2.78 |
| TNFSF9 | TNF Superfamily Member 9 | Protein Coding | 37 | GC19P006531 | 2.78 |
| PNN | Pinin, Desmosome Associated Protein | Protein Coding | 35 | GC14P039175 | 2.78 |
| MFGE8 | Milk Fat Globule EGF And Factor V/VIII Domain Containing | Protein Coding | 44 | GC15M088898 | 2.78 |
| PNKD | PNKD Metallo-Beta-Lactamase Domain Containing | Protein Coding | 42 | GC02P218270 | 2.78 |
| LPIN2 | Lipin 2 | Protein Coding | 42 | GC18M002906 | 2.78 |
| TEAD3 | TEA Domain Transcription Factor 3 | Protein Coding | 39 | GC06M042215 | 2.77 |
| PPOX | Protoporphyrinogen Oxidase | Protein Coding | 43 | GC01P161167 | 2.77 |
| SLC46A1 | Solute Carrier Family 46 Member 1 | Protein Coding | 44 | GC17M029956 | 2.77 |
| IMPDH2 | Inosine Monophosphate Dehydrogenase 2 | Protein Coding | 47 | GC03M049253 | 2.77 |
| CD226 | CD226 Molecule | Protein Coding | 43 | GC18M069831 | 2.77 |
| TCP1 | T-Complex 1 | Protein Coding | 41 | GC06M159778 | 2.77 |
| KLF12 | Kruppel Like Factor 12 | Protein Coding | 38 | GC13M073686 | 2.76 |
| GLO1 | Glyoxalase I | Protein Coding | 45 | GC06M042239 | 2.76 |
| BLZF1 | Basic Leucine Zipper Nuclear Factor 1 | Protein Coding | 39 | GC01P169367 | 2.76 |
| ESS2 | Ess-2 Splicing Factor Homolog | Protein Coding | 28 | GC22M019130 | 2.76 |
| CLDN8 | Claudin 8 | Protein Coding | 35 | GC21M030214 | 2.76 |
| LRAT | Lecithin Retinol Acyltransferase | Protein Coding | 44 | GC04P154626 | 2.76 |
| DEFA1 | Defensin Alpha 1 | Protein Coding | 40 | GC08M006977 | 2.76 |
| DUXAP8 | Double Homeobox A Pseudogene 8 | Pseudogene | 9 | GC22P015784 | 2.76 |
| TUBA1B | Tubulin Alpha 1b | Protein Coding | 42 | GC12M049127 | 2.76 |
| FUT6 | Fucosyltransferase 6 | Protein Coding | 41 | GC19M005830 | 2.76 |
| C1orf109 | Chromosome 1 Open Reading Frame 109 | Protein Coding | 33 | GC01M037681 | 2.76 |
| MIR654 | MicroRNA 654 | RNA Gene | 17 | GC14P104823 | 2.76 |
| TRPM4 | Transient Receptor Potential Cation Channel Subfamily M Member 4 | Protein Coding | 45 | GC19P049157 | 2.75 |
| TRPC6 | Transient Receptor Potential Cation Channel Subfamily C Member 6 | Protein Coding | 48 | GC11M101356 | 2.75 |
| ITGA1 | Integrin Subunit Alpha 1 | Protein Coding | 41 | GC05P052788 | 2.75 |
| ZIC1 | Zic Family Member 1 | Protein Coding | 45 | GC03P147393 | 2.75 |
| DHCR7 | 7-Dehydrocholesterol Reductase | Protein Coding | 46 | GC11M071428 | 2.75 |
| MYNN | Myoneurin | Protein Coding | 37 | GC03P169773 | 2.75 |
| ABCG8 | ATP Binding Cassette Subfamily G Member 8 | Protein Coding | 42 | GC02P043828 | 2.75 |
| CSTA | Cystatin A | Protein Coding | 44 | GC03P122325 | 2.75 |
| FNDC3B | Fibronectin Type III Domain Containing 3B | Protein Coding | 36 | GC03P172039 | 2.75 |
| MIR611 | MicroRNA 611 | RNA Gene | 14 | GC11M061792 | 2.74 |
| GHSR | Growth Hormone Secretagogue Receptor | Protein Coding | 47 | GC03M172443 | 2.74 |
| TECTA | Tectorin Alpha | Protein Coding | 39 | GC11P121101 | 2.74 |
| CYP7A1 | Cytochrome P450 Family 7 Subfamily A Member 1 | Protein Coding | 42 | GC08M058476 | 2.74 |
| BIRC6 | Baculoviral IAP Repeat Containing 6 | Protein Coding | 41 | GC02P032357 | 2.74 |
| RFC4 | Replication Factor C Subunit 4 | Protein Coding | 41 | GC03M186789 | 2.74 |
| NR1H3 | Nuclear Receptor Subfamily 1 Group H Member 3 | Protein Coding | 47 | GC11P047248 | 2.74 |
| DOCK1 | Dedicator Of Cytokinesis 1 | Protein Coding | 44 | GC10P126905 | 2.74 |
| LIPN | Lipase Family Member N | Protein Coding | 36 | GC10P088760 | 2.74 |
| LCT | Lactase | Protein Coding | 43 | GC02M135787 | 2.73 |
| ALDH7A1 | Aldehyde Dehydrogenase 7 Family Member A1 | Protein Coding | 47 | GC05M126541 | 2.73 |
| ATP2C1 | ATPase Secretory Pathway Ca2+ Transporting 1 | Protein Coding | 45 | GC03P130850 | 2.73 |
| PFKFB4 | 6-Phosphofructo-2-Kinase/Fructose-2,6-Biphosphatase 4 | Protein Coding | 41 | GC03M048517 | 2.73 |
| SPAST | Spastin | Protein Coding | 40 | GC02P032063 | 2.73 |
| UGT2B7 | UDP Glucuronosyltransferase Family 2 Member B7 | Protein Coding | 44 | GC04P069051 | 2.73 |
| RAB5A | RAB5A, Member RAS Oncogene Family | Protein Coding | 45 | GC03P019963 | 2.73 |
| SLC26A2 | Solute Carrier Family 26 Member 2 | Protein Coding | 44 | GC05P149944 | 2.73 |
| PGC | Progastricsin | Protein Coding | 42 | GC06M041736 | 2.73 |
| CDK3 | Cyclin Dependent Kinase 3 | Protein Coding | 40 | GC17P076007 | 2.73 |
| NKX2-3 | NK2 Homeobox 3 | Protein Coding | 37 | GC10P099532 | 2.73 |
| ITCH | Itchy E3 Ubiquitin Protein Ligase | Protein Coding | 45 | GC20P034363 | 2.72 |
| UGCG | UDP-Glucose Ceramide Glucosyltransferase | Protein Coding | 43 | GC09P111896 | 2.72 |
| EIF2S1 | Eukaryotic Translation Initiation Factor 2 Subunit Alpha | Protein Coding | 44 | GC14P067359 | 2.72 |
| YBX3 | Y-Box Binding Protein 3 | Protein Coding | 39 | GC12M013875 | 2.72 |
| ANXA11 | Annexin A11 | Protein Coding | 44 | GC10M080150 | 2.72 |
| EDAR | Ectodysplasin A Receptor | Protein Coding | 41 | GC02M108894 | 2.72 |
| CCR9 | C-C Motif Chemokine Receptor 9 | Protein Coding | 40 | GC03P045903 | 2.72 |
| SLC10A2 | Solute Carrier Family 10 Member 2 | Protein Coding | 43 | GC13M103043 | 2.72 |
| EIF5A | Eukaryotic Translation Initiation Factor 5A | Protein Coding | 43 | GC17P007306 | 2.72 |
| CBLIF | Cobalamin Binding Intrinsic Factor | Protein Coding | 34 | GC11M059829 | 2.72 |
| NAF1 | Nuclear Assembly Factor 1 Ribonucleoprotein | Protein Coding | 33 | GC04M163109 | 2.72 |
| MIR648 | MicroRNA 648 | RNA Gene | 15 | GC22M017980 | 2.72 |
| KRT9 | Keratin 9 | Protein Coding | 39 | GC17M041565 | 2.72 |
| SH3BP2 | SH3 Domain Binding Protein 2 | Protein Coding | 40 | GC04P002794 | 2.72 |
| RBFOX1 | RNA Binding Fox-1 Homolog 1 | Protein Coding | 37 | GC16P005240 | 2.72 |
| RBM3 | RNA Binding Motif Protein 3 | Protein Coding | 39 | GC0XP048574 | 2.72 |
| FHL1 | Four And A Half LIM Domains 1 | Protein Coding | 45 | GC0XP136146 | 2.71 |
| GRM6 | Glutamate Metabotropic Receptor 6 | Protein Coding | 47 | GC05M178978 | 2.71 |
| PFKL | Phosphofructokinase, Liver Type | Protein Coding | 44 | GC21P044300 | 2.71 |
| HYOU1 | Hypoxia Up-Regulated 1 | Protein Coding | 43 | GC11M119045 | 2.71 |
| CYSLTR1 | Cysteinyl Leukotriene Receptor 1 | Protein Coding | 43 | GC0XM078271 | 2.71 |
| TEAD4 | TEA Domain Transcription Factor 4 | Protein Coding | 41 | GC12P002959 | 2.71 |
| CSAG2 | CSAG Family Member 2 | Protein Coding | 17 | GC0XM152708 | 2.71 |
| NLK | Nemo Like Kinase | Protein Coding | 43 | GC17P028042 | 2.71 |
| DYNC1H1 | Dynein Cytoplasmic 1 Heavy Chain 1 | Protein Coding | 44 | GC14P104635 | 2.71 |
| ACTA2-AS1 | ACTA2 Antisense RNA 1 | RNA Gene | 15 | GC10P088932 | 2.7 |
| CARD11 | Caspase Recruitment Domain Family Member 11 | Protein Coding | 47 | GC07M002906 | 2.7 |
| B9D2 | B9 Domain Containing 2 | Protein Coding | 40 | GC19M041354 | 2.7 |
| ERAP1 | Endoplasmic Reticulum Aminopeptidase 1 | Protein Coding | 43 | GC05M096760 | 2.7 |
| TRMT9B | TRNA Methyltransferase 9B (Putative) | Protein Coding | 26 | GC08P012945 | 2.7 |
| ASCL2 | Achaete-Scute Family BHLH Transcription Factor 2 | Protein Coding | 37 | GC11M002269 | 2.7 |
| H6PD | Hexose-6-Phosphate Dehydrogenase/Glucose 1-Dehydrogenase | Protein Coding | 41 | GC01P009234 | 2.69 |
| RALY | RALY Heterogeneous Nuclear Ribonucleoprotein | Protein Coding | 37 | GC20P033993 | 2.69 |
| CUTC | CutC Copper Transporter | Protein Coding | 37 | GC10P099702 | 2.69 |
| PPBP | Pro-Platelet Basic Protein | Protein Coding | 43 | GC04M073986 | 2.69 |
| ZNF331 | Zinc Finger Protein 331 | Protein Coding | 40 | GC19P053521 | 2.69 |
| COX15 | Cytochrome C Oxidase Assembly Homolog COX15 | Protein Coding | 42 | GC10M099696 | 2.69 |
| DYNC2H1 | Dynein Cytoplasmic 2 Heavy Chain 1 | Protein Coding | 38 | GC11P103109 | 2.69 |
| HLA-DQA2 | Major Histocompatibility Complex, Class II, DQ Alpha 2 | Protein Coding | 37 | GC06P032741 | 2.68 |
| MAP3K7 | Mitogen-Activated Protein Kinase Kinase Kinase 7 | Protein Coding | 51 | GC06M090513 | 2.68 |
| HSPA14 | Heat Shock Protein Family A (Hsp70) Member 14 | Protein Coding | 39 | GC10P014790 | 2.68 |
| BHMT | Betaine--Homocysteine S-Methyltransferase | Protein Coding | 41 | GC05P079111 | 2.68 |
| UCP2 | Uncoupling Protein 2 | Protein Coding | 45 | GC11M073974 | 2.68 |
| CCDC88A | Coiled-Coil Domain Containing 88A | Protein Coding | 40 | GC02M055287 | 2.68 |
| BTG1 | BTG Anti-Proliferation Factor 1 | Protein Coding | 41 | GC12M092140 | 2.68 |
| PRAC2 | PRAC2 Small Nuclear Protein | Protein Coding | 20 | GC17P048720 | 2.68 |
| SRF | Serum Response Factor | Protein Coding | 41 | GC06P043171 | 2.68 |
| CAMK2B | Calcium/Calmodulin Dependent Protein Kinase II Beta | Protein Coding | 50 | GC07M044217 | 2.68 |
| SFPQ | Splicing Factor Proline And Glutamine Rich | Protein Coding | 43 | GC01M035176 | 2.68 |
| EED | Embryonic Ectoderm Development | Protein Coding | 42 | GC11P086244 | 2.68 |
| IRGM | Immunity Related GTPase M | Protein Coding | 38 | GC05P150846 | 2.68 |
| SNRNP70 | Small Nuclear Ribonucleoprotein U1 Subunit 70 | Protein Coding | 38 | GC19P049085 | 2.67 |
| ASPM | Assembly Factor For Spindle Microtubules | Protein Coding | 39 | GC01M197084 | 2.67 |
| KCNJ1 | Potassium Inwardly Rectifying Channel Subfamily J Member 1 | Protein Coding | 47 | GC11M128741 | 2.67 |
| AIMP1 | Aminoacyl TRNA Synthetase Complex Interacting Multifunctional Protein 1 | Protein Coding | 43 | GC04P106315 | 2.67 |
| MYH3 | Myosin Heavy Chain 3 | Protein Coding | 43 | GC17M010628 | 2.67 |
| TMEM8B | Transmembrane Protein 8B | Protein Coding | 33 | GC09P035785 | 2.67 |
| PLAC1 | Placenta Enriched 1 | Protein Coding | 35 | GC0XM134565 | 2.67 |
| SIRT6 | Sirtuin 6 | Protein Coding | 45 | GC19M004174 | 2.67 |
| TSPAN32 | Tetraspanin 32 | Protein Coding | 36 | GC11P002302 | 2.67 |
| NFYC | Nuclear Transcription Factor Y Subunit Gamma | Protein Coding | 42 | GC01P040691 | 2.67 |
| PAX4 | Paired Box 4 | Protein Coding | 43 | GC07M127610 | 2.67 |
| SPTB | Spectrin Beta, Erythrocytic | Protein Coding | 40 | GC14M064746 | 2.67 |
| KRT15 | Keratin 15 | Protein Coding | 39 | GC17M041513 | 2.66 |
| RPL9 | Ribosomal Protein L9 | Protein Coding | 41 | GC04M039452 | 2.66 |
| TSPAN8 | Tetraspanin 8 | Protein Coding | 39 | GC12M071125 | 2.66 |
| MIA | MIA SH3 Domain Containing | Protein Coding | 39 | GC19P040771 | 2.66 |
| ABCC6 | ATP Binding Cassette Subfamily C Member 6 | Protein Coding | 45 | GC16M016148 | 2.66 |
| RPS25 | Ribosomal Protein S25 | Protein Coding | 37 | GC11M119015 | 2.66 |
| SCN2A | Sodium Voltage-Gated Channel Alpha Subunit 2 | Protein Coding | 47 | GC02P165194 | 2.66 |
| PTGDS | Prostaglandin D2 Synthase | Protein Coding | 45 | GC09P136982 | 2.66 |
| GSK3A | Glycogen Synthase Kinase 3 Alpha | Protein Coding | 48 | GC19M042230 | 2.65 |
| ZNF668 | Zinc Finger Protein 668 | Protein Coding | 36 | GC16M031072 | 2.65 |
| EPB41 | Erythrocyte Membrane Protein Band 4.1 | Protein Coding | 45 | GC01P028887 | 2.65 |
| ACRBP | Acrosin Binding Protein | Protein Coding | 34 | GC12M006638 | 2.65 |
| ABCB7 | ATP Binding Cassette Subfamily B Member 7 | Protein Coding | 43 | GC0XM075053 | 2.65 |
| SLC52A3 | Solute Carrier Family 52 Member 3 | Protein Coding | 39 | GC20M000741 | 2.65 |
| ENSG00000246528 |  | RNA Gene | 8 | GC08P069835 | 2.65 |
| CBLN4 | Cerebellin 4 Precursor | Protein Coding | 35 | GC20M055997 | 2.65 |
| CACNA2D1 | Calcium Voltage-Gated Channel Auxiliary Subunit Alpha2delta 1 | Protein Coding | 45 | GC07M081946 | 2.65 |
| SIX2 | SIX Homeobox 2 | Protein Coding | 40 | GC02M045005 | 2.65 |
| CAVIN1 | Caveolae Associated Protein 1 | Protein Coding | 32 | GC17M042404 | 2.65 |
| RPS6KA5 | Ribosomal Protein S6 Kinase A5 | Protein Coding | 45 | GC14M090847 | 2.64 |
| NOX4 | NADPH Oxidase 4 | Protein Coding | 42 | GC11M089324 | 2.64 |
| EFNB2 | Ephrin B2 | Protein Coding | 44 | GC13M106489 | 2.64 |
| GCH1 | GTP Cyclohydrolase 1 | Protein Coding | 47 | GC14M054842 | 2.64 |
| UPK1A | Uroplakin 1A | Protein Coding | 37 | GC19P038225 | 2.64 |
| RBCK1 | RANBP2-Type And C3HC4-Type Zinc Finger Containing 1 | Protein Coding | 43 | GC20P000407 | 2.64 |
| SMN2 | Survival Of Motor Neuron 2, Centromeric | Protein Coding | 42 | GC05P070049 | 2.64 |
| NMT1 | N-Myristoyltransferase 1 | Protein Coding | 43 | GC17P045052 | 2.64 |
| PROK2 | Prokineticin 2 | Protein Coding | 44 | GC03M071771 | 2.63 |
| STRAP | Serine/Threonine Kinase Receptor Associated Protein | Protein Coding | 37 | GC12P015882 | 2.63 |
| MAGEE1 | MAGE Family Member E1 | Protein Coding | 35 | GC0XP076427 | 2.63 |
| TATDN1 | TatD DNase Domain Containing 1 | Protein Coding | 35 | GC08M124488 | 2.63 |
| CA8 | Carbonic Anhydrase 8 | Protein Coding | 47 | GC08M060187 | 2.63 |
| SLC3A2 | Solute Carrier Family 3 Member 2 | Protein Coding | 42 | GC11P062856 | 2.63 |
| GAS8-AS1 | GAS8 Antisense RNA 1 | RNA Gene | 23 | GC16M090028 | 2.63 |
| MAGED1 | MAGE Family Member D1 | Protein Coding | 42 | GC0XP051803 | 2.63 |
| RAD51AP1 | RAD51 Associated Protein 1 | Protein Coding | 35 | GC12P008105 | 2.63 |
| CAMP | Cathelicidin Antimicrobial Peptide | Protein Coding | 41 | GC03P048266 | 2.63 |
| BDKRB1 | Bradykinin Receptor B1 | Protein Coding | 43 | GC14P096263 | 2.63 |
| SLC4A2 | Solute Carrier Family 4 Member 2 | Protein Coding | 43 | GC07P151057 | 2.63 |
| CCT2 | Chaperonin Containing TCP1 Subunit 2 | Protein Coding | 40 | GC12P069585 | 2.62 |
| EFEMP2 | EGF Containing Fibulin Extracellular Matrix Protein 2 | Protein Coding | 43 | GC11M065867 | 2.62 |
| PKP2 | Plakophilin 2 | Protein Coding | 45 | GC12M032790 | 2.62 |
| TBX2 | T-Box Transcription Factor 2 | Protein Coding | 45 | GC17P061399 | 2.62 |
| OVAAL | Ovarian Adenocarcinoma Amplified Long Non-Coding RNA | RNA Gene | 14 | GC01P180558 | 2.62 |
| BBS9 | Bardet-Biedl Syndrome 9 | Protein Coding | 39 | GC07P033112 | 2.62 |
| SLC12A1 | Solute Carrier Family 12 Member 1 | Protein Coding | 46 | GC15P048191 | 2.62 |
| DIAPH1 | Diaphanous Related Formin 1 | Protein Coding | 47 | GC05M141477 | 2.62 |
| CD33 | CD33 Molecule | Protein Coding | 43 | GC19P051212 | 2.62 |
| CHGB | Chromogranin B | Protein Coding | 39 | GC20P005911 | 2.62 |
| PRUNE1 | Prune Exopolyphosphatase 1 | Protein Coding | 32 | GC01P151008 | 2.62 |
| ADRM1 | Adhesion Regulating Molecule 1 | Protein Coding | 39 | GC20P062302 | 2.62 |
| ANLN | Anillin Actin Binding Protein | Protein Coding | 41 | GC07P036389 | 2.62 |
| GRIN2D | Glutamate Ionotropic Receptor NMDA Type Subunit 2D | Protein Coding | 48 | GC19P048394 | 2.62 |
| SLC7A1 | Solute Carrier Family 7 Member 1 | Protein Coding | 43 | GC13M029509 | 2.62 |
| AURKC | Aurora Kinase C | Protein Coding | 47 | GC19P057230 | 2.62 |
| PANK2 | Pantothenate Kinase 2 | Protein Coding | 43 | GC20P003887 | 2.62 |
| NABP1 | Nucleic Acid Binding Protein 1 | Protein Coding | 35 | GC02P191678 | 2.62 |
| DNAH9 | Dynein Axonemal Heavy Chain 9 | Protein Coding | 39 | GC17P011598 | 2.61 |
| RNASE3 | Ribonuclease A Family Member 3 | Protein Coding | 40 | GC14P020891 | 2.61 |
| SMARCC1 | SWI/SNF Related, Matrix Associated, Actin Dependent Regulator Of Chromatin Subfamily C Member 1 | Protein Coding | 43 | GC03M047585 | 2.61 |
| CSMD1 | CUB And Sushi Multiple Domains 1 | Protein Coding | 37 | GC08M002953 | 2.61 |
| NR5A2 | Nuclear Receptor Subfamily 5 Group A Member 2 | Protein Coding | 45 | GC01P199996 | 2.61 |
| MRPL28 | Mitochondrial Ribosomal Protein L28 | Protein Coding | 37 | GC16M000357 | 2.61 |
| CCND2-AS1 | CCND2 Antisense RNA 1 | RNA Gene | 13 | GC12M004248 | 2.61 |
| HLA-DRB5 | Major Histocompatibility Complex, Class II, DR Beta 5 | Protein Coding | 40 | GC06M032683 | 2.61 |
| PRDX6 | Peroxiredoxin 6 | Protein Coding | 46 | GC01P173477 | 2.6 |
| CELF2 | CUGBP Elav-Like Family Member 2 | Protein Coding | 41 | GC10P010462 | 2.6 |
| ACLY | ATP Citrate Lyase | Protein Coding | 45 | GC17M041866 | 2.6 |
| TYRO3 | TYRO3 Protein Tyrosine Kinase | Protein Coding | 47 | GC15P041557 | 2.6 |
| JRK | Jrk Helix-Turn-Helix Protein | Protein Coding | 36 | GC08M142657 | 2.6 |
| EFHC1 | EF-Hand Domain Containing 1 | Protein Coding | 40 | GC06P052362 | 2.6 |
| DYRK1A | Dual Specificity Tyrosine Phosphorylation Regulated Kinase 1A | Protein Coding | 50 | GC21P037365 | 2.6 |
| DDX58 | DExD/H-Box Helicase 58 | Protein Coding | 47 | GC09M032455 | 2.6 |
| FGF20 | Fibroblast Growth Factor 20 | Protein Coding | 40 | GC08M016992 | 2.6 |
| DPP8 | Dipeptidyl Peptidase 8 | Protein Coding | 37 | GC15M065442 | 2.6 |
| USH1C | USH1 Protein Network Component Harmonin | Protein Coding | 41 | GC11M017494 | 2.6 |
| STAT2 | Signal Transducer And Activator Of Transcription 2 | Protein Coding | 47 | GC12M056341 | 2.6 |
| LIMS1 | LIM Zinc Finger Domain Containing 1 | Protein Coding | 40 | GC02P108609 | 2.6 |
| CSAG3 | CSAG Family Member 3 | Protein Coding | 18 | GC0XP152753 | 2.59 |
| P2RY2 | Purinergic Receptor P2Y2 | Protein Coding | 45 | GC11P073217 | 2.59 |
| TICAM1 | Toll Like Receptor Adaptor Molecule 1 | Protein Coding | 44 | GC19M004815 | 2.59 |
| ARHGAP11A | Rho GTPase Activating Protein 11A | Protein Coding | 36 | GC15P032615 | 2.59 |
| TUBA1C | Tubulin Alpha 1c | Protein Coding | 41 | GC12P049188 | 2.59 |
| COL6A1 | Collagen Type VI Alpha 1 Chain | Protein Coding | 43 | GC21P045981 | 2.59 |
| GRB10 | Growth Factor Receptor Bound Protein 10 | Protein Coding | 43 | GC07M050590 | 2.59 |
| FCRL5 | Fc Receptor Like 5 | Protein Coding | 37 | GC01M157477 | 2.59 |
| C8orf37-AS1 | C8orf37 Antisense RNA 1 | RNA Gene | 12 | GC08P095204 | 2.59 |
| MYBL2 | MYB Proto-Oncogene Like 2 | Protein Coding | 42 | GC20P043667 | 2.58 |
| DSC1 | Desmocollin 1 | Protein Coding | 38 | GC18M031129 | 2.58 |
| SHOX2 | Short Stature Homeobox 2 | Protein Coding | 39 | GC03M158095 | 2.58 |
| GSDMB | Gasdermin B | Protein Coding | 36 | GC17M039904 | 2.58 |
| CCDC68 | Coiled-Coil Domain Containing 68 | Protein Coding | 36 | GC18M054901 | 2.58 |
| FOXA2 | Forkhead Box A2 | Protein Coding | 45 | GC20M022581 | 2.58 |
| GSTA2 | Glutathione S-Transferase Alpha 2 | Protein Coding | 41 | GC06M052750 | 2.58 |
| CRABP2 | Cellular Retinoic Acid Binding Protein 2 | Protein Coding | 43 | GC01M156701 | 2.58 |
| YEATS4 | YEATS Domain Containing 4 | Protein Coding | 37 | GC12P069359 | 2.58 |
| CXCL16 | C-X-C Motif Chemokine Ligand 16 | Protein Coding | 40 | GC17M004733 | 2.58 |
| SPTBN1 | Spectrin Beta, Non-Erythrocytic 1 | Protein Coding | 43 | GC02P054456 | 2.58 |
| RAP1GAP | RAP1 GTPase Activating Protein | Protein Coding | 39 | GC01M021596 | 2.58 |
| DAPK3 | Death Associated Protein Kinase 3 | Protein Coding | 44 | GC19M003958 | 2.57 |
| FBLN5 | Fibulin 5 | Protein Coding | 44 | GC14M091869 | 2.57 |
| NBEAL2 | Neurobeachin Like 2 | Protein Coding | 40 | GC03P046979 | 2.57 |
| SS18L1 | SS18L1 Subunit Of BAF Chromatin Remodeling Complex | Protein Coding | 38 | GC20P062143 | 2.56 |
| UBB | Ubiquitin B | Protein Coding | 43 | GC17P016380 | 2.56 |
| SRMS | Src-Related Kinase Lacking C-Terminal Regulatory Tyrosine And N-Terminal Myristylation Sites | Protein Coding | 38 | GC20M063539 | 2.56 |
| MGP | Matrix Gla Protein | Protein Coding | 42 | GC12M014881 | 2.56 |
| EWSAT1 | Ewing Sarcoma Associated Transcript 1 | RNA Gene | 18 | GC15P072889 | 2.56 |
| CDK11A | Cyclin Dependent Kinase 11A | Protein Coding | 37 | GC01M001702 | 2.56 |
| INAVA | Innate Immunity Activator | Protein Coding | 28 | GC01P200892 | 2.56 |
| CXXC4 | CXXC Finger Protein 4 | Protein Coding | 39 | GC04M104468 | 2.56 |
| MARS1 | Methionyl-TRNA Synthetase 1 | Protein Coding | 35 | GC12P057476 | 2.56 |
| YWHAB | Tyrosine 3-Monooxygenase/Tryptophan 5-Monooxygenase Activation Protein Beta | Protein Coding | 48 | GC20P044885 | 2.56 |
| SULT1A2 | Sulfotransferase Family 1A Member 2 | Protein Coding | 42 | GC16M028591 | 2.55 |
| CCN5 | Cellular Communication Network Factor 5 | Protein Coding | 31 | GC20P044715 | 2.55 |
| SMARCD1 | SWI/SNF Related, Matrix Associated, Actin Dependent Regulator Of Chromatin, Subfamily D, Member 1 | Protein Coding | 41 | GC12P050085 | 2.55 |
| ADCYAP1 | Adenylate Cyclase Activating Polypeptide 1 | Protein Coding | 41 | GC18P000895 | 2.55 |
| KHDRBS1 | KH RNA Binding Domain Containing, Signal Transduction Associated 1 | Protein Coding | 41 | GC01P031981 | 2.55 |
| EIF4A2 | Eukaryotic Translation Initiation Factor 4A2 | Protein Coding | 45 | GC03P186783 | 2.55 |
| TES | Testin LIM Domain Protein | Protein Coding | 41 | GC07P116210 | 2.55 |
| HNRNPH1 | Heterogeneous Nuclear Ribonucleoprotein H1 | Protein Coding | 38 | GC05M179614 | 2.55 |
| COL8A2 | Collagen Type VIII Alpha 2 Chain | Protein Coding | 41 | GC01M036095 | 2.55 |
| CENPA | Centromere Protein A | Protein Coding | 39 | GC02P026750 | 2.55 |
| HUS1 | HUS1 Checkpoint Clamp Component | Protein Coding | 41 | GC07M047974 | 2.55 |
| MYRF | Myelin Regulatory Factor | Protein Coding | 34 | GC11P061753 | 2.55 |
| CAVIN3 | Caveolae Associated Protein 3 | Protein Coding | 30 | GC11M006319 | 2.55 |
| PLOD2 | Procollagen-Lysine,2-Oxoglutarate 5-Dioxygenase 2 | Protein Coding | 45 | GC03M146069 | 2.54 |
| CRY1 | Cryptochrome Circadian Regulator 1 | Protein Coding | 43 | GC12M106991 | 2.54 |
| MYH10 | Myosin Heavy Chain 10 | Protein Coding | 46 | GC17M008474 | 2.54 |
| DGKG | Diacylglycerol Kinase Gamma | Protein Coding | 44 | GC03M186105 | 2.54 |
| FOXK1 | Forkhead Box K1 | Protein Coding | 35 | GC07P004682 | 2.54 |
| PBX3 | PBX Homeobox 3 | Protein Coding | 41 | GC09P125747 | 2.54 |
| DEF6 | DEF6 Guanine Nucleotide Exchange Factor | Protein Coding | 40 | GC06P047431 | 2.54 |
| RHD | Rh Blood Group D Antigen | Protein Coding | 40 | GC01P025272 | 2.54 |
| BCORL1 | BCL6 Corepressor Like 1 | Protein Coding | 35 | GC0XP129980 | 2.54 |
| S100A10 | S100 Calcium Binding Protein A10 | Protein Coding | 45 | GC01M151955 | 2.54 |
| PEX5 | Peroxisomal Biogenesis Factor 5 | Protein Coding | 42 | GC12P008247 | 2.54 |
| PCDH15 | Protocadherin Related 15 | Protein Coding | 39 | GC10M053802 | 2.54 |
| DLGAP2 | DLG Associated Protein 2 | Protein Coding | 37 | GC08P000739 | 2.53 |
| CES1 | Carboxylesterase 1 | Protein Coding | 46 | GC16M055836 | 2.53 |
| TUBB6 | Tubulin Beta 6 Class V | Protein Coding | 41 | GC18P012307 | 2.53 |
| KRT3 | Keratin 3 | Protein Coding | 39 | GC12M052789 | 2.53 |
| TKTL1 | Transketolase Like 1 | Protein Coding | 41 | GC0XP154295 | 2.53 |
| DHX9 | DExH-Box Helicase 9 | Protein Coding | 40 | GC01P182839 | 2.53 |
| STYK1 | Serine/Threonine/Tyrosine Kinase 1 | Protein Coding | 40 | GC12M013873 | 2.53 |
| CRTC1 | CREB Regulated Transcription Coactivator 1 | Protein Coding | 42 | GC19P023333 | 2.53 |
| FABP2 | Fatty Acid Binding Protein 2 | Protein Coding | 43 | GC04M119317 | 2.53 |
| CCNC | Cyclin C | Protein Coding | 40 | GC06M099542 | 2.53 |
| CAMKK2 | Calcium/Calmodulin Dependent Protein Kinase Kinase 2 | Protein Coding | 45 | GC12M121309 | 2.53 |
| BBS1 | Bardet-Biedl Syndrome 1 | Protein Coding | 38 | GC11P066499 | 2.53 |
| FOXR2 | Forkhead Box R2 | Protein Coding | 29 | GC0XP055623 | 2.53 |
| NRCAM | Neuronal Cell Adhesion Molecule | Protein Coding | 41 | GC07M108147 | 2.53 |
| UBE2L3 | Ubiquitin Conjugating Enzyme E2 L3 | Protein Coding | 45 | GC22P021549 | 2.53 |
| ST3GAL3 | ST3 Beta-Galactoside Alpha-2,3-Sialyltransferase 3 | Protein Coding | 45 | GC01P043705 | 2.52 |
| IL11RA | Interleukin 11 Receptor Subunit Alpha | Protein Coding | 44 | GC09P034650 | 2.52 |
| APCDD1 | APC Down-Regulated 1 | Protein Coding | 40 | GC18P010444 | 2.52 |
| OTOF | Otoferlin | Protein Coding | 41 | GC02M026458 | 2.52 |
| PCGF2 | Polycomb Group Ring Finger 2 | Protein Coding | 39 | GC17M038733 | 2.52 |
| PIK3AP1 | Phosphoinositide-3-Kinase Adaptor Protein 1 | Protein Coding | 39 | GC10M096593 | 2.52 |
| KTN1 | Kinectin 1 | Protein Coding | 39 | GC14P055559 | 2.52 |
| H3-4 | H3.4 Histone | Protein Coding | 32 | GC01M228427 | 2.52 |
| CD200 | CD200 Molecule | Protein Coding | 39 | GC03P112332 | 2.52 |
| CNOT3 | CCR4-NOT Transcription Complex Subunit 3 | Protein Coding | 41 | GC19P055360 | 2.52 |
| UBE2V2 | Ubiquitin Conjugating Enzyme E2 V2 | Protein Coding | 43 | GC08P047998 | 2.51 |
| HEYL | Hes Related Family BHLH Transcription Factor With YRPW Motif Like | Protein Coding | 39 | GC01M039623 | 2.51 |
| PPP1CA | Protein Phosphatase 1 Catalytic Subunit Alpha | Protein Coding | 48 | GC11M067415 | 2.51 |
| DUSP4 | Dual Specificity Phosphatase 4 | Protein Coding | 43 | GC08M029334 | 2.51 |
| KRTAP10-1 | Keratin Associated Protein 10-1 | Protein Coding | 27 | GC21M044538 | 2.51 |
| IER3 | Immediate Early Response 3 | Protein Coding | 38 | GC06M030743 | 2.51 |
| POU3F3 | POU Class 3 Homeobox 3 | Protein Coding | 39 | GC02P104855 | 2.51 |
| DDX10 | DEAD-Box Helicase 10 | Protein Coding | 39 | GC11P108569 | 2.51 |
| GTDC1 | Glycosyltransferase Like Domain Containing 1 | Protein Coding | 36 | GC02M143938 | 2.5 |
| NEIL1 | Nei Like DNA Glycosylase 1 | Protein Coding | 39 | GC15P075346 | 2.5 |
| GLUD1 | Glutamate Dehydrogenase 1 | Protein Coding | 50 | GC10M087050 | 2.5 |
| SOCS2 | Suppressor Of Cytokine Signaling 2 | Protein Coding | 43 | GC12P093569 | 2.5 |
| TAGLN2 | Transgelin 2 | Protein Coding | 40 | GC01M159918 | 2.5 |
| RRAGA | Ras Related GTP Binding A | Protein Coding | 39 | GC09P019049 | 2.5 |
| SLC9A1 | Solute Carrier Family 9 Member A1 | Protein Coding | 51 | GC01M027109 | 2.5 |
| MAT1A | Methionine Adenosyltransferase 1A | Protein Coding | 47 | GC10M080271 | 2.5 |
| UBA52 | Ubiquitin A-52 Residue Ribosomal Protein Fusion Product 1 | Protein Coding | 41 | GC19P018563 | 2.5 |
| HOXA3 | Homeobox A3 | Protein Coding | 39 | GC07M027107 | 2.5 |
| COLQ | Collagen Like Tail Subunit Of Asymmetric Acetylcholinesterase | Protein Coding | 39 | GC03M015815 | 2.5 |
| PTPRK | Protein Tyrosine Phosphatase Receptor Type K | Protein Coding | 43 | GC06M127949 | 2.5 |
| PHF21A | PHD Finger Protein 21A | Protein Coding | 41 | GC11M061099 | 2.49 |
| NFYA | Nuclear Transcription Factor Y Subunit Alpha | Protein Coding | 39 | GC06P047495 | 2.49 |
| ANKS1A | Ankyrin Repeat And Sterile Alpha Motif Domain Containing 1A | Protein Coding | 36 | GC06P047428 | 2.49 |
| SMCR8 | SMCR8-C9orf72 Complex Subunit | Protein Coding | 32 | GC17P018807 | 2.49 |
| BAG6 | BAG Cochaperone 6 | Protein Coding | 35 | GC06M031639 | 2.49 |
| ITPKC | Inositol-Trisphosphate 3-Kinase C | Protein Coding | 43 | GC19P040718 | 2.49 |
| CES2 | Carboxylesterase 2 | Protein Coding | 43 | GC16P066934 | 2.49 |
| COG2 | Component Of Oligomeric Golgi Complex 2 | Protein Coding | 40 | GC01P230642 | 2.49 |
| RIPK3 | Receptor Interacting Serine/Threonine Kinase 3 | Protein Coding | 43 | GC14M024336 | 2.49 |
| PPL | Periplakin | Protein Coding | 40 | GC16M004872 | 2.49 |
| TENM3 | Teneurin Transmembrane Protein 3 | Protein Coding | 36 | GC04P181448 | 2.49 |
| PA2G4 | Proliferation-Associated 2G4 | Protein Coding | 40 | GC12P056105 | 2.48 |
| SPART | Spartin | Protein Coding | 31 | GC13M036302 | 2.48 |
| YWHAQ | Tyrosine 3-Monooxygenase/Tryptophan 5-Monooxygenase Activation Protein Theta | Protein Coding | 47 | GC02M009583 | 2.48 |
| USP22 | Ubiquitin Specific Peptidase 22 | Protein Coding | 41 | GC17M020999 | 2.48 |
| SLC35F5 | Solute Carrier Family 35 Member F5 | Protein Coding | 35 | GC02M113705 | 2.48 |
| COL5A1 | Collagen Type V Alpha 1 Chain | Protein Coding | 45 | GC09P134641 | 2.48 |
| GRIK2 | Glutamate Ionotropic Receptor Kainate Type Subunit 2 | Protein Coding | 47 | GC06P101181 | 2.48 |
| NAP1L4 | Nucleosome Assembly Protein 1 Like 4 | Protein Coding | 39 | GC11M002944 | 2.48 |
| METAP2 | Methionyl Aminopeptidase 2 | Protein Coding | 44 | GC12P095473 | 2.48 |
| PDLIM7 | PDZ And LIM Domain 7 | Protein Coding | 40 | GC05M177483 | 2.48 |
| OTUD7A | OTU Deubiquitinase 7A | Protein Coding | 37 | GC15M031475 | 2.48 |
| CCT3 | Chaperonin Containing TCP1 Subunit 3 | Protein Coding | 41 | GC01M156308 | 2.48 |
| DNAJB6 | DnaJ Heat Shock Protein Family (Hsp40) Member B6 | Protein Coding | 42 | GC07P157335 | 2.47 |
| GOPC | Golgi Associated PDZ And Coiled-Coil Motif Containing | Protein Coding | 41 | GC06M117560 | 2.47 |
| ADSL | Adenylosuccinate Lyase | Protein Coding | 47 | GC22P040346 | 2.47 |
| ZFYVE9 | Zinc Finger FYVE-Type Containing 9 | Protein Coding | 41 | GC01P052142 | 2.47 |
| INCENP | Inner Centromere Protein | Protein Coding | 40 | GC11P062142 | 2.47 |
| ADGRG1 | Adhesion G Protein-Coupled Receptor G1 | Protein Coding | 39 | GC16P057610 | 2.47 |
| TDG | Thymine DNA Glycosylase | Protein Coding | 44 | GC12P103965 | 2.47 |
| TDP1 | Tyrosyl-DNA Phosphodiesterase 1 | Protein Coding | 44 | GC14P089954 | 2.47 |
| SIRT4 | Sirtuin 4 | Protein Coding | 40 | GC12P120291 | 2.47 |
| GPX4 | Glutathione Peroxidase 4 | Protein Coding | 47 | GC19P001103 | 2.46 |
| MYCBP | MYC Binding Protein | Protein Coding | 38 | GC01M038862 | 2.46 |
| TSC22D1 | TSC22 Domain Family Member 1 | Protein Coding | 40 | GC13M044432 | 2.46 |
| IL15RA | Interleukin 15 Receptor Subunit Alpha | Protein Coding | 41 | GC10M005943 | 2.46 |
| SBF2 | SET Binding Factor 2 | Protein Coding | 40 | GC11M009785 | 2.46 |
| SOAT1 | Sterol O-Acyltransferase 1 | Protein Coding | 44 | GC01P179262 | 2.46 |
| ABCG5 | ATP Binding Cassette Subfamily G Member 5 | Protein Coding | 44 | GC02M043806 | 2.46 |
| FUBP1 | Far Upstream Element Binding Protein 1 | Protein Coding | 38 | GC01M077944 | 2.46 |
| TFDP2 | Transcription Factor Dp-2 | Protein Coding | 39 | GC03M141944 | 2.45 |
| GPR35 | G Protein-Coupled Receptor 35 | Protein Coding | 43 | GC02P240605 | 2.45 |
| BRCC3 | BRCA1/BRCA2-Containing Complex Subunit 3 | Protein Coding | 43 | GC0XP155071 | 2.45 |
| DOCK5 | Dedicator Of Cytokinesis 5 | Protein Coding | 37 | GC08P025184 | 2.45 |
| IL1R2 | Interleukin 1 Receptor Type 2 | Protein Coding | 45 | GC02P101991 | 2.45 |
| RBFOX3 | RNA Binding Fox-1 Homolog 3 | Protein Coding | 35 | GC17M079089 | 2.45 |
| HIP1 | Huntingtin Interacting Protein 1 | Protein Coding | 41 | GC07M075533 | 2.45 |
| PRPF4 | Pre-MRNA Processing Factor 4 | Protein Coding | 42 | GC09P113275 | 2.45 |
| UBE2V1 | Ubiquitin Conjugating Enzyme E2 V1 | Protein Coding | 42 | GC20M050082 | 2.44 |
| CT47A1 | Cancer/Testis Antigen Family 47 Member A1 | Protein Coding | 23 | GC0XM120982 | 2.44 |
| CT47A11 | Cancer/Testis Antigen Family 47 Member A11 | Protein Coding | 23 | GC0XM120933 | 2.44 |
| CT47A6 | Cancer/Testis Antigen Family 47 Member A6 | Protein Coding | 22 | GC0XM120958 | 2.44 |
| CT47A2 | Cancer/Testis Antigen Family 47 Member A2 | Protein Coding | 21 | GC0XM120977 | 2.44 |
| CT47A3 | Cancer/Testis Antigen Family 47 Member A3 | Protein Coding | 21 | GC0XM120973 | 2.44 |
| CT47A4 | Cancer/Testis Antigen Family 47 Member A4 | Protein Coding | 20 | GC0XM120967 | 2.44 |
| CDC7 | Cell Division Cycle 7 | Protein Coding | 44 | GC01P091500 | 2.44 |
| ADORA2A | Adenosine A2a Receptor | Protein Coding | 45 | GC22P024417 | 2.44 |
| SGCD | Sarcoglycan Delta | Protein Coding | 45 | GC05P155686 | 2.44 |
| STK36 | Serine/Threonine Kinase 36 | Protein Coding | 43 | GC02P218672 | 2.44 |
| LGR4 | Leucine Rich Repeat Containing G Protein-Coupled Receptor 4 | Protein Coding | 39 | GC11M027345 | 2.44 |
| RACGAP1 | Rac GTPase Activating Protein 1 | Protein Coding | 42 | GC12M049978 | 2.44 |
| BDKRB2 | Bradykinin Receptor B2 | Protein Coding | 44 | GC14P096205 | 2.44 |
| MTA2 | Metastasis Associated 1 Family Member 2 | Protein Coding | 39 | GC11M063413 | 2.44 |
| AVL9 | AVL9 Cell Migration Associated | Protein Coding | 34 | GC07P032495 | 2.44 |
| CT47B1 | Cancer/Testis Antigen Family 47 Member B1 | Protein Coding | 25 | GC0XM120872 | 2.44 |
| PABPC1 | Poly(A) Binding Protein Cytoplasmic 1 | Protein Coding | 41 | GC08M100685 | 2.44 |
| GTPBP8 | GTP Binding Protein 8 (Putative) | Protein Coding | 34 | GC03P112990 | 2.44 |
| MNX1 | Motor Neuron And Pancreas Homeobox 1 | Protein Coding | 41 | GC07M156994 | 2.43 |
| FKBP1A | FKBP Prolyl Isomerase 1A | Protein Coding | 46 | GC20M001369 | 2.43 |
| ELAPOR1 | Endosome-Lysosome Associated Apoptosis And Autophagy Regulator 1 | Protein Coding | 27 | GC01P109119 | 2.43 |
| KPNB1 | Karyopherin Subunit Beta 1 | Protein Coding | 43 | GC17P047649 | 2.43 |
| CA4 | Carbonic Anhydrase 4 | Protein Coding | 47 | GC17P060149 | 2.43 |
| RPL22 | Ribosomal Protein L22 | Protein Coding | 43 | GC01M006179 | 2.43 |
| DNAJA3 | DnaJ Heat Shock Protein Family (Hsp40) Member A3 | Protein Coding | 40 | GC16P004425 | 2.43 |
| TNFRSF12A | TNF Receptor Superfamily Member 12A | Protein Coding | 44 | GC16P003018 | 2.43 |
| ADAMTSL1 | ADAMTS Like 1 | Protein Coding | 41 | GC09P017906 | 2.43 |
| TNFRSF25 | TNF Receptor Superfamily Member 25 | Protein Coding | 43 | GC01M006460 | 2.43 |
| GALNT6 | Polypeptide N-Acetylgalactosaminyltransferase 6 | Protein Coding | 40 | GC12M051351 | 2.42 |
| TNS3 | Tensin 3 | Protein Coding | 38 | GC07M047281 | 2.42 |
| LRG1 | Leucine Rich Alpha-2-Glycoprotein 1 | Protein Coding | 39 | GC19M004538 | 2.42 |
| SLC25A28 | Solute Carrier Family 25 Member 28 | Protein Coding | 38 | GC10M099610 | 2.42 |
| GNE | Glucosamine (UDP-N-Acetyl)-2-Epimerase/N-Acetylmannosamine Kinase | Protein Coding | 43 | GC09M036214 | 2.42 |
| MCM8 | Minichromosome Maintenance 8 Homologous Recombination Repair Factor | Protein Coding | 40 | GC20P005963 | 2.42 |
| PAK5 | P21 (RAC1) Activated Kinase 5 | Protein Coding | 36 | GC20M009538 | 2.42 |
| BHLHE40 | Basic Helix-Loop-Helix Family Member E40 | Protein Coding | 41 | GC03P004997 | 2.42 |
| APOA5 | Apolipoprotein A5 | Protein Coding | 44 | GC11M116789 | 2.42 |
| SYMPK | Symplekin | Protein Coding | 39 | GC19M045815 | 2.42 |
| IL1RL1 | Interleukin 1 Receptor Like 1 | Protein Coding | 41 | GC02P102294 | 2.42 |
| LCORL | Ligand Dependent Nuclear Receptor Corepressor Like | Protein Coding | 35 | GC04M017844 | 2.42 |
| HAO1 | Hydroxyacid Oxidase 1 | Protein Coding | 44 | GC20M007863 | 2.42 |
| MIR874 | MicroRNA 874 | RNA Gene | 18 | GC05M137647 | 2.42 |
| KCNA5 | Potassium Voltage-Gated Channel Subfamily A Member 5 | Protein Coding | 45 | GC12P005043 | 2.42 |
| PDCD6 | Programmed Cell Death 6 | Protein Coding | 39 | GC05P000272 | 2.41 |
| GATD3A | Glutamine Amidotransferase Like Class 1 Domain Containing 3A | Protein Coding | 27 | GC21P044134 | 2.41 |
| DAG1 | Dystroglycan 1 | Protein Coding | 46 | GC03P049482 | 2.41 |
| PRICKLE1 | Prickle Planar Cell Polarity Protein 1 | Protein Coding | 42 | GC12M042456 | 2.41 |
| MATR3 | Matrin 3 | Protein Coding | 41 | GC05P139274 | 2.41 |
| YWHAH | Tyrosine 3-Monooxygenase/Tryptophan 5-Monooxygenase Activation Protein Eta | Protein Coding | 47 | GC22P031944 | 2.41 |
| ADAM8 | ADAM Metallopeptidase Domain 8 | Protein Coding | 42 | GC10M133262 | 2.41 |
| MYO6 | Myosin VI | Protein Coding | 45 | GC06P075749 | 2.41 |
| ST7 | Suppression Of Tumorigenicity 7 | Protein Coding | 36 | GC07P117018 | 2.41 |
| GSS | Glutathione Synthetase | Protein Coding | 47 | GC20M034928 | 2.41 |
| ID3 | Inhibitor Of DNA Binding 3, HLH Protein | Protein Coding | 41 | GC01M023557 | 2.41 |
| GRIN2A | Glutamate Ionotropic Receptor NMDA Type Subunit 2A | Protein Coding | 51 | GC16M009753 | 2.41 |
| GGCT | Gamma-Glutamylcyclotransferase | Protein Coding | 39 | GC07M030496 | 2.41 |
| HEXA | Hexosaminidase Subunit Alpha | Protein Coding | 45 | GC15M072340 | 2.41 |
| SH2D3A | SH2 Domain Containing 3A | Protein Coding | 35 | GC19M006752 | 2.41 |
| GATA3-AS1 | GATA3 Antisense RNA 1 | RNA Gene | 16 | GC10M008016 | 2.4 |
| DIP2B | Disco Interacting Protein 2 Homolog B | Protein Coding | 39 | GC12P050504 | 2.4 |
| PTPRB | Protein Tyrosine Phosphatase Receptor Type B | Protein Coding | 45 | GC12M070516 | 2.4 |
| CASP4 | Caspase 4 | Protein Coding | 46 | GC11M104942 | 2.4 |
| TFAP4 | Transcription Factor AP-4 | Protein Coding | 37 | GC16M004247 | 2.4 |
| DYSF | Dysferlin | Protein Coding | 43 | GC02P071453 | 2.4 |
| TNFRSF17 | TNF Receptor Superfamily Member 17 | Protein Coding | 44 | GC16P011965 | 2.4 |
| SLC16A3 | Solute Carrier Family 16 Member 3 | Protein Coding | 44 | GC17P082217 | 2.4 |
| PREX1 | Phosphatidylinositol-3,4,5-Trisphosphate Dependent Rac Exchange Factor 1 | Protein Coding | 43 | GC20M048624 | 2.4 |
| SF3B2 | Splicing Factor 3b Subunit 2 | Protein Coding | 38 | GC11P066050 | 2.4 |
| GALNT5 | Polypeptide N-Acetylgalactosaminyltransferase 5 | Protein Coding | 40 | GC02P157258 | 2.4 |
| ATXN3 | Ataxin 3 | Protein Coding | 44 | GC14M094059 | 2.4 |
| DDX17 | DEAD-Box Helicase 17 | Protein Coding | 40 | GC22M038483 | 2.4 |
| ABCA12 | ATP Binding Cassette Subfamily A Member 12 | Protein Coding | 42 | GC02M214931 | 2.4 |
| ZIC5 | Zic Family Member 5 | Protein Coding | 35 | GC13M099962 | 2.4 |
| SETD1A | SET Domain Containing 1A, Histone Lysine Methyltransferase | Protein Coding | 40 | GC16P030980 | 2.4 |
| CDHR4 | Cadherin Related Family Member 4 | Protein Coding | 29 | GC03M049790 | 2.4 |
| CHD3 | Chromodomain Helicase DNA Binding Protein 3 | Protein Coding | 41 | GC17P008060 | 2.39 |
| GFPT1 | Glutamine--Fructose-6-Phosphate Transaminase 1 | Protein Coding | 46 | GC02M069283 | 2.39 |
| PPIG | Peptidylprolyl Isomerase G | Protein Coding | 41 | GC02P169584 | 2.39 |
| PGAM1 | Phosphoglycerate Mutase 1 | Protein Coding | 43 | GC10P097426 | 2.39 |
| MARK4 | Microtubule Affinity Regulating Kinase 4 | Protein Coding | 44 | GC19P045079 | 2.39 |
| AP2B1 | Adaptor Related Protein Complex 2 Subunit Beta 1 | Protein Coding | 42 | GC17P035578 | 2.39 |
| IL27 | Interleukin 27 | Protein Coding | 38 | GC16M028511 | 2.39 |
| F12 | Coagulation Factor XII | Protein Coding | 48 | GC05M177402 | 2.39 |
| BATF | Basic Leucine Zipper ATF-Like Transcription Factor | Protein Coding | 43 | GC14P075523 | 2.39 |
| TAPBP | TAP Binding Protein | Protein Coding | 43 | GC06M033299 | 2.39 |
| MCM5 | Minichromosome Maintenance Complex Component 5 | Protein Coding | 44 | GC22P035400 | 2.39 |
| AFDN | Afadin, Adherens Junction Formation Factor | Protein Coding | 34 | GC06P167827 | 2.39 |
| VAMP1 | Vesicle Associated Membrane Protein 1 | Protein Coding | 44 | GC12M006462 | 2.39 |
| RMI1 | RecQ Mediated Genome Instability 1 | Protein Coding | 37 | GC09P083980 | 2.38 |
| LCP1 | Lymphocyte Cytosolic Protein 1 | Protein Coding | 41 | GC13M046132 | 2.38 |
| EGFL6 | EGF Like Domain Multiple 6 | Protein Coding | 38 | GC0XP013569 | 2.38 |
| PHF8 | PHD Finger Protein 8 | Protein Coding | 41 | GC0XM053936 | 2.38 |
| HSD17B2 | Hydroxysteroid 17-Beta Dehydrogenase 2 | Protein Coding | 44 | GC16P082068 | 2.38 |
| SP3 | Sp3 Transcription Factor | Protein Coding | 42 | GC02M173882 | 2.38 |
| TDGF1P3 | Teratocarcinoma-Derived Growth Factor 1 Pseudogene 3 | Pseudogene | 16 | GC0XP110520 | 2.38 |
| ADRA1A | Adrenoceptor Alpha 1A | Protein Coding | 47 | GC08M026747 | 2.38 |
| NTF4 | Neurotrophin 4 | Protein Coding | 44 | GC19M049073 | 2.38 |
| PROCR | Protein C Receptor | Protein Coding | 42 | GC20P035182 | 2.38 |
| EPB41L2 | Erythrocyte Membrane Protein Band 4.1 Like 2 | Protein Coding | 39 | GC06M130820 | 2.38 |
| CHRND | Cholinergic Receptor Nicotinic Delta Subunit | Protein Coding | 42 | GC02P232525 | 2.37 |
| CAMK2A | Calcium/Calmodulin Dependent Protein Kinase II Alpha | Protein Coding | 49 | GC05M150219 | 2.37 |
| TNFRSF14 | TNF Receptor Superfamily Member 14 | Protein Coding | 43 | GC01P002555 | 2.37 |
| KBTBD11 | Kelch Repeat And BTB Domain Containing 11 | Protein Coding | 34 | GC08P001973 | 2.37 |
| WFDC1 | WAP Four-Disulfide Core Domain 1 | Protein Coding | 36 | GC16P084328 | 2.37 |
| SCYL1 | SCY1 Like Pseudokinase 1 | Protein Coding | 41 | GC11P065525 | 2.37 |
| MPV17 | Mitochondrial Inner Membrane Protein MPV17 | Protein Coding | 41 | GC02M027309 | 2.37 |
| FKBP8 | FKBP Prolyl Isomerase 8 | Protein Coding | 42 | GC19M018503 | 2.37 |
| MIR33B | MicroRNA 33b | RNA Gene | 18 | GC17M017813 | 2.37 |
| TRG | T Cell Receptor Gamma Locus | Protein Coding | 11 | GC07M038240 | 2.37 |
| LIPE | Lipase E, Hormone Sensitive Type | Protein Coding | 47 | GC19M042401 | 2.37 |
| SMARCA1 | SWI/SNF Related, Matrix Associated, Actin Dependent Regulator Of Chromatin, Subfamily A, Member 1 | Protein Coding | 39 | GC0XM129447 | 2.37 |
| TXNIP | Thioredoxin Interacting Protein | Protein Coding | 37 | GC01M145992 | 2.37 |
| FOXL1 | Forkhead Box L1 | Protein Coding | 37 | GC16P086576 | 2.37 |
| MORC1 | MORC Family CW-Type Zinc Finger 1 | Protein Coding | 35 | GC03M108957 | 2.37 |
| KHSRP | KH-Type Splicing Regulatory Protein | Protein Coding | 41 | GC19M006413 | 2.37 |
| ZNF384 | Zinc Finger Protein 384 | Protein Coding | 36 | GC12M006668 | 2.37 |
| AZIN1 | Antizyme Inhibitor 1 | Protein Coding | 39 | GC08M102826 | 2.37 |
| MSRB3 | Methionine Sulfoxide Reductase B3 | Protein Coding | 43 | GC12P065279 | 2.37 |
| PRDX4 | Peroxiredoxin 4 | Protein Coding | 43 | GC0XP023665 | 2.36 |
| CITED1 | Cbp/P300 Interacting Transactivator With Glu/Asp Rich Carboxy-Terminal Domain 1 | Protein Coding | 36 | GC0XM072301 | 2.36 |
| MYL2 | Myosin Light Chain 2 | Protein Coding | 49 | GC12M110910 | 2.36 |
| CTSZ | Cathepsin Z | Protein Coding | 44 | GC20M058995 | 2.36 |
| RUVBL1 | RuvB Like AAA ATPase 1 | Protein Coding | 44 | GC03M128064 | 2.36 |
| LINC00668 | Long Intergenic Non-Protein Coding RNA 668 | RNA Gene | 17 | GC18M006922 | 2.36 |
| CHRNA7 | Cholinergic Receptor Nicotinic Alpha 7 Subunit | Protein Coding | 45 | GC15P031923 | 2.36 |
| TRPC5 | Transient Receptor Potential Cation Channel Subfamily C Member 5 | Protein Coding | 41 | GC0XM111774 | 2.36 |
| COL10A1 | Collagen Type X Alpha 1 Chain | Protein Coding | 43 | GC06M116118 | 2.36 |
| RTEL1-TNFRSF6B | RTEL1-TNFRSF6B Readthrough (NMD Candidate) | RNA Gene | 17 | GC20P063657 | 2.36 |
| EIF6 | Eukaryotic Translation Initiation Factor 6 | Protein Coding | 40 | GC20M035278 | 2.36 |
| CDH20 | Cadherin 20 | Protein Coding | 36 | GC18P061333 | 2.36 |
| IATPR | ITGB1 Adjacent Tumor Promoting LncRNA | RNA Gene | 9 | GC10M033073 | 2.36 |
| PCSK1 | Proprotein Convertase Subtilisin/Kexin Type 1 | Protein Coding | 45 | GC05M096391 | 2.35 |
| LETM1 | Leucine Zipper And EF-Hand Containing Transmembrane Protein 1 | Protein Coding | 41 | GC04M001781 | 2.35 |
| SYNPO2 | Synaptopodin 2 | Protein Coding | 35 | GC04P118850 | 2.35 |
| GART | Phosphoribosylglycinamide Formyltransferase, Phosphoribosylglycinamide Synthetase, Phosphoribosylaminoimidazole Synthetase | Protein Coding | 41 | GC21M033503 | 2.35 |
| SMARCAD1 | SWI/SNF-Related, Matrix-Associated Actin-Dependent Regulator Of Chromatin, Subfamily A, Containing DEAD/H Box 1 | Protein Coding | 45 | GC04P094207 | 2.35 |
| NDP | Norrin Cystine Knot Growth Factor NDP | Protein Coding | 43 | GC0XM043948 | 2.35 |
| RNGTT | RNA Guanylyltransferase And 5'-Phosphatase | Protein Coding | 43 | GC06M088609 | 2.35 |
| RFWD3 | Ring Finger And WD Repeat Domain 3 | Protein Coding | 40 | GC16M074621 | 2.35 |
| PDE5A | Phosphodiesterase 5A | Protein Coding | 44 | GC04M119494 | 2.35 |
| PARD3 | Par-3 Family Cell Polarity Regulator | Protein Coding | 41 | GC10M034110 | 2.35 |
| AGL | Amylo-Alpha-1, 6-Glucosidase, 4-Alpha-Glucanotransferase | Protein Coding | 45 | GC01P099850 | 2.35 |
| CAMK2D | Calcium/Calmodulin Dependent Protein Kinase II Delta | Protein Coding | 48 | GC04M113452 | 2.35 |
| GAEC1 | Gene Amplified In Esophageal Cancer 1 | RNA Gene | 5 | GC07U901831 | 2.34 |
| SCRIB | Scribble Planar Cell Polarity Protein | Protein Coding | 40 | GC08M143822 | 2.34 |
| COX7A2L | Cytochrome C Oxidase Subunit 7A2 Like | Protein Coding | 40 | GC02M042312 | 2.34 |
| MIR367 | MicroRNA 367 | RNA Gene | 17 | GC04M112647 | 2.34 |
| S1PR1 | Sphingosine-1-Phosphate Receptor 1 | Protein Coding | 44 | GC01P101236 | 2.34 |
| SMURF1 | SMAD Specific E3 Ubiquitin Protein Ligase 1 | Protein Coding | 45 | GC07M099027 | 2.34 |
| SIPA1 | Signal-Induced Proliferation-Associated 1 | Protein Coding | 41 | GC11P065638 | 2.33 |
| MCPH1 | Microcephalin 1 | Protein Coding | 40 | GC08P006406 | 2.33 |
| PUS1 | Pseudouridine Synthase 1 | Protein Coding | 41 | GC12P131929 | 2.33 |
| MT-TT | Mitochondrially Encoded TRNA-Thr (ACN) | RNA Gene | 15 | GCMTP015890 | 2.33 |
| MIR383 | MicroRNA 383 | RNA Gene | 15 | GC08M014853 | 2.33 |
| RPS8 | Ribosomal Protein S8 | Protein Coding | 39 | GC01P044775 | 2.33 |
| YWHAG | Tyrosine 3-Monooxygenase/Tryptophan 5-Monooxygenase Activation Protein Gamma | Protein Coding | 49 | GC07M076327 | 2.33 |
| RPL3 | Ribosomal Protein L3 | Protein Coding | 41 | GC22M045394 | 2.33 |
| HAS2 | Hyaluronan Synthase 2 | Protein Coding | 40 | GC08M121594 | 2.33 |
| VANGL2 | VANGL Planar Cell Polarity Protein 2 | Protein Coding | 43 | GC01P160370 | 2.33 |
| PHACTR1 | Phosphatase And Actin Regulator 1 | Protein Coding | 37 | GC06P012717 | 2.33 |
| TBL1X | Transducin Beta Like 1 X-Linked | Protein Coding | 36 | GC0XP009463 | 2.33 |
| TBXAS1 | Thromboxane A Synthase 1 | Protein Coding | 50 | GC07P139777 | 2.33 |
| POP1 | POP1 Homolog, Ribonuclease P/MRP Subunit | Protein Coding | 40 | GC08P098117 | 2.33 |
| BMP3 | Bone Morphogenetic Protein 3 | Protein Coding | 42 | GC04P081030 | 2.32 |
| LINC02582 | Long Intergenic Non-Protein Coding RNA 2582 | RNA Gene | 10 | GC18P073325 | 2.32 |
| PPIA | Peptidylprolyl Isomerase A | Protein Coding | 47 | GC07P044807 | 2.32 |
| MIR101-2 | MicroRNA 101-2 | RNA Gene | 16 | GC09P004863 | 2.32 |
| DFFA | DNA Fragmentation Factor Subunit Alpha | Protein Coding | 45 | GC01M010456 | 2.32 |
| SCO1 | Synthesis Of Cytochrome C Oxidase 1 | Protein Coding | 47 | GC17M010672 | 2.32 |
| RPS6KA1 | Ribosomal Protein S6 Kinase A1 | Protein Coding | 50 | GC01P026540 | 2.32 |
| PRPH | Peripherin | Protein Coding | 44 | GC12P049293 | 2.32 |
| NME8 | NME/NM23 Family Member 8 | Protein Coding | 40 | GC07P037889 | 2.32 |
| CNNM4 | Cyclin And CBS Domain Divalent Metal Cation Transport Mediator 4 | Protein Coding | 39 | GC02P096790 | 2.32 |
| MELTF | Melanotransferrin | Protein Coding | 33 | GC03M196987 | 2.32 |
| ALPG | Alkaline Phosphatase, Germ Cell | Protein Coding | 32 | GC02P232407 | 2.32 |
| DSE | Dermatan Sulfate Epimerase | Protein Coding | 41 | GC06P116255 | 2.31 |
| MCOLN1 | Mucolipin 1 | Protein Coding | 44 | GC19P007523 | 2.31 |
| OGT | O-Linked N-Acetylglucosamine (GlcNAc) Transferase | Protein Coding | 44 | GC0XP071534 | 2.31 |
| CDCA3 | Cell Division Cycle Associated 3 | Protein Coding | 37 | GC12M006844 | 2.31 |
| CSN1S1 | Casein Alpha S1 | Protein Coding | 34 | GC04P069932 | 2.31 |
| KIR2DL3 | Killer Cell Immunoglobulin Like Receptor, Two Ig Domains And Long Cytoplasmic Tail 3 | Protein Coding | 36 | GC19P055469 | 2.31 |
| DYNLRB2 | Dynein Light Chain Roadblock-Type 2 | Protein Coding | 40 | GC16P080540 | 2.31 |
| BMP2K | BMP2 Inducible Kinase | Protein Coding | 39 | GC04P078776 | 2.31 |
| PPP3CA | Protein Phosphatase 3 Catalytic Subunit Alpha | Protein Coding | 52 | GC04M101024 | 2.31 |
| RNF114 | Ring Finger Protein 114 | Protein Coding | 40 | GC20P049936 | 2.31 |
| CASC20 | Cancer Susceptibility 20 | RNA Gene | 10 | GC20P006428 | 2.31 |
| GNAI2 | G Protein Subunit Alpha I2 | Protein Coding | 47 | GC03P050226 | 2.31 |
| GNB1L | G Protein Subunit Beta 1 Like | Protein Coding | 36 | GC22M019770 | 2.31 |
| DBH | Dopamine Beta-Hydroxylase | Protein Coding | 50 | GC09P133636 | 2.31 |
| HDLBP | High Density Lipoprotein Binding Protein | Protein Coding | 40 | GC02M241227 | 2.3 |
| EFNB1 | Ephrin B1 | Protein Coding | 47 | GC0XP068828 | 2.3 |
| IRF2 | Interferon Regulatory Factor 2 | Protein Coding | 43 | GC04M184387 | 2.3 |
| ADAM28 | ADAM Metallopeptidase Domain 28 | Protein Coding | 39 | GC08P024294 | 2.3 |
| SIRT5 | Sirtuin 5 | Protein Coding | 45 | GC06P013574 | 2.3 |
| PPA2 | Inorganic Pyrophosphatase 2 | Protein Coding | 41 | GC04M105369 | 2.3 |
| NBPF3 | NBPF Member 3 | Protein Coding | 35 | GC01P021442 | 2.3 |
| MAP3K14 | Mitogen-Activated Protein Kinase Kinase Kinase 14 | Protein Coding | 44 | GC17M045263 | 2.3 |
| LILRB2 | Leukocyte Immunoglobulin Like Receptor B2 | Protein Coding | 40 | GC19M054409 | 2.3 |
| DIS3 | DIS3 Homolog, Exosome Endoribonuclease And 3'-5' Exoribonuclease | Protein Coding | 40 | GC13M072752 | 2.3 |
| ELOVL5 | ELOVL Fatty Acid Elongase 5 | Protein Coding | 43 | GC06M053240 | 2.3 |
| DIDO1 | Death Inducer-Obliterator 1 | Protein Coding | 37 | GC20M062877 | 2.29 |
| GALP | Galanin Like Peptide | Protein Coding | 34 | GC19P056176 | 2.29 |
| LINC00939 | Long Intergenic Non-Protein Coding RNA 939 | RNA Gene | 13 | GC12M125958 | 2.29 |
| MIR4447 | MicroRNA 4447 | RNA Gene | 11 | GC03M116851 | 2.29 |
| FABP5 | Fatty Acid Binding Protein 5 | Protein Coding | 41 | GC08P081282 | 2.29 |
| RND3 | Rho Family GTPase 3 | Protein Coding | 41 | GC02M150468 | 2.29 |
| TNKS2 | Tankyrase 2 | Protein Coding | 43 | GC10P091798 | 2.29 |
| GTF2I | General Transcription Factor IIi | Protein Coding | 42 | GC07P074658 | 2.29 |
| NCF4 | Neutrophil Cytosolic Factor 4 | Protein Coding | 48 | GC22P036860 | 2.29 |
| HEY2 | Hes Related Family BHLH Transcription Factor With YRPW Motif 2 | Protein Coding | 38 | GC06P125730 | 2.29 |
| NPAT | Nuclear Protein, Coactivator Of Histone Transcription | Protein Coding | 35 | GC11M108157 | 2.29 |
| TP53I3 | Tumor Protein P53 Inducible Protein 3 | Protein Coding | 41 | GC02M024078 | 2.29 |
| BST2 | Bone Marrow Stromal Cell Antigen 2 | Protein Coding | 39 | GC19M017403 | 2.29 |
| PTPN23 | Protein Tyrosine Phosphatase Non-Receptor Type 23 | Protein Coding | 38 | GC03P047397 | 2.29 |
| CAPN1 | Calpain 1 | Protein Coding | 49 | GC11P065198 | 2.29 |
| UCP1 | Uncoupling Protein 1 | Protein Coding | 44 | GC04M140559 | 2.28 |
| SNW1 | SNW Domain Containing 1 | Protein Coding | 43 | GC14M077717 | 2.28 |
| NLRC5 | NLR Family CARD Domain Containing 5 | Protein Coding | 39 | GC16P056990 | 2.28 |
| ACADM | Acyl-CoA Dehydrogenase Medium Chain | Protein Coding | 47 | GC01P075724 | 2.28 |
| SKIL | SKI Like Proto-Oncogene | Protein Coding | 44 | GC03P170357 | 2.28 |
| HOXD10 | Homeobox D10 | Protein Coding | 40 | GC02P176108 | 2.28 |
| PPP6C | Protein Phosphatase 6 Catalytic Subunit | Protein Coding | 43 | GC09M125147 | 2.28 |
| ZMPSTE24 | Zinc Metallopeptidase STE24 | Protein Coding | 43 | GC01P040258 | 2.28 |
| RPH3AL | Rabphilin 3A Like (Without C2 Domains) | Protein Coding | 38 | GC17M000212 | 2.28 |
| POLR2L | RNA Polymerase II, I And III Subunit L | Protein Coding | 41 | GC11M000829 | 2.28 |
| MED1 | Mediator Complex Subunit 1 | Protein Coding | 41 | GC17M039404 | 2.28 |
| MIR548B | MicroRNA 548b | RNA Gene | 15 | GC06M119069 | 2.28 |
| AGXT | Alanine--Glyoxylate And Serine--Pyruvate Aminotransferase | Protein Coding | 45 | GC02P240868 | 2.28 |
| IRF2BP2 | Interferon Regulatory Factor 2 Binding Protein 2 | Protein Coding | 36 | GC01M234604 | 2.28 |
| KCNN4 | Potassium Calcium-Activated Channel Subfamily N Member 4 | Protein Coding | 48 | GC19M043767 | 2.28 |
| GAD2 | Glutamate Decarboxylase 2 | Protein Coding | 46 | GC10P026216 | 2.28 |
| STOML2 | Stomatin Like 2 | Protein Coding | 38 | GC09M035099 | 2.27 |
| WRNIP1 | WRN Helicase Interacting Protein 1 | Protein Coding | 36 | GC06P002766 | 2.27 |
| PXK | PX Domain Containing Serine/Threonine Kinase Like | Protein Coding | 38 | GC03P058333 | 2.27 |
| MYO5A | Myosin VA | Protein Coding | 44 | GC15M060775 | 2.27 |
| CEACAM4 | CEA Cell Adhesion Molecule 4 | Protein Coding | 32 | GC19M042520 | 2.27 |
| DSG1 | Desmoglein 1 | Protein Coding | 43 | GC18P031318 | 2.27 |
| PLAGL2 | PLAG1 Like Zinc Finger 2 | Protein Coding | 37 | GC20M032192 | 2.27 |
| CNR2 | Cannabinoid Receptor 2 | Protein Coding | 45 | GC01M023870 | 2.27 |
| MIR550A1 | MicroRNA 550a-1 | RNA Gene | 16 | GC07P030329 | 2.27 |
| CARM1 | Coactivator Associated Arginine Methyltransferase 1 | Protein Coding | 47 | GC19P010871 | 2.27 |
| MEIS2 | Meis Homeobox 2 | Protein Coding | 42 | GC15M036889 | 2.27 |
| AGTR2 | Angiotensin II Receptor Type 2 | Protein Coding | 43 | GC0XP116170 | 2.27 |
| B3GNT6 | UDP-GlcNAc:BetaGal Beta-1,3-N-Acetylglucosaminyltransferase 6 | Protein Coding | 36 | GC11P077034 | 2.27 |
| VAT1 | Vesicle Amine Transport 1 | Protein Coding | 38 | GC17M043014 | 2.27 |
| FPR1 | Formyl Peptide Receptor 1 | Protein Coding | 47 | GC19M051745 | 2.27 |
| GOLGB1 | Golgin B1 | Protein Coding | 37 | GC03M121663 | 2.27 |
| CDK20 | Cyclin Dependent Kinase 20 | Protein Coding | 40 | GC09M087966 | 2.27 |
| HHEX | Hematopoietically Expressed Homeobox | Protein Coding | 42 | GC10P092689 | 2.27 |
| ARRB2 | Arrestin Beta 2 | Protein Coding | 44 | GC17P004711 | 2.27 |
| ITGB5 | Integrin Subunit Beta 5 | Protein Coding | 45 | GC03M124761 | 2.26 |
| PPHLN1 | Periphilin 1 | Protein Coding | 37 | GC12P042238 | 2.26 |
| RPL4 | Ribosomal Protein L4 | Protein Coding | 41 | GC15M066498 | 2.26 |
| ALOX5AP | Arachidonate 5-Lipoxygenase Activating Protein | Protein Coding | 44 | GC13P030713 | 2.26 |
| KCNN3 | Potassium Calcium-Activated Channel Subfamily N Member 3 | Protein Coding | 44 | GC01M154697 | 2.26 |
| GSTT2 | Glutathione S-Transferase Theta 2 (Gene/Pseudogene) | Protein Coding | 35 | GC22P023980 | 2.26 |
| PHKB | Phosphorylase Kinase Regulatory Subunit Beta | Protein Coding | 45 | GC16P047436 | 2.26 |
| MBD1 | Methyl-CpG Binding Domain Protein 1 | Protein Coding | 40 | GC18M050266 | 2.26 |
| USP2 | Ubiquitin Specific Peptidase 2 | Protein Coding | 43 | GC11M119355 | 2.26 |
| SCAF1 | SR-Related CTD Associated Factor 1 | Protein Coding | 32 | GC19P049645 | 2.26 |
| ELP1 | Elongator Complex Protein 1 | Protein Coding | 33 | GC09M108868 | 2.26 |
| BPTF | Bromodomain PHD Finger Transcription Factor | Protein Coding | 40 | GC17P067825 | 2.26 |
| GSTA3 | Glutathione S-Transferase Alpha 3 | Protein Coding | 44 | GC06M052896 | 2.26 |
| EOMES | Eomesodermin | Protein Coding | 43 | GC03M027715 | 2.25 |
| CBX4 | Chromobox 4 | Protein Coding | 42 | GC17M079833 | 2.25 |
| WDR88 | WD Repeat Domain 88 | Protein Coding | 33 | GC19P033132 | 2.25 |
| RASGRF1 | Ras Protein Specific Guanine Nucleotide Releasing Factor 1 | Protein Coding | 41 | GC15M078959 | 2.25 |
| TMBIM1 | Transmembrane BAX Inhibitor Motif Containing 1 | Protein Coding | 35 | GC02M218274 | 2.25 |
| PNMA8A | PNMA Family Member 8A | Protein Coding | 24 | GC19M046468 | 2.25 |
| CCNG2 | Cyclin G2 | Protein Coding | 36 | GC04P077158 | 2.25 |
| TRO | Trophinin | Protein Coding | 37 | GC0XP054920 | 2.25 |
| MAGED4 | MAGE Family Member D4 | Protein Coding | 29 | GC0XP052184 | 2.25 |
| NUP88 | Nucleoporin 88 | Protein Coding | 39 | GC17M005366 | 2.25 |
| G3BP2 | G3BP Stress Granule Assembly Factor 2 | Protein Coding | 36 | GC04M075642 | 2.25 |
| DDX27 | DEAD-Box Helicase 27 | Protein Coding | 37 | GC20P049219 | 2.25 |
| FAF1 | Fas Associated Factor 1 | Protein Coding | 43 | GC01M050439 | 2.25 |
| PSTPIP1 | Proline-Serine-Threonine Phosphatase Interacting Protein 1 | Protein Coding | 45 | GC15P076993 | 2.24 |
| CAST | Calpastatin | Protein Coding | 45 | GC05P096525 | 2.24 |
| DCD | Dermcidin | Protein Coding | 36 | GC12M054644 | 2.24 |
| ADHFE1 | Alcohol Dehydrogenase Iron Containing 1 | Protein Coding | 37 | GC08P066432 | 2.24 |
| PEAK1 | Pseudopodium Enriched Atypical Kinase 1 | Protein Coding | 34 | GC15M077100 | 2.24 |
| HMGB2 | High Mobility Group Box 2 | Protein Coding | 42 | GC04M173331 | 2.24 |
| MLN | Motilin | Protein Coding | 35 | GC06M033794 | 2.24 |
| PADI4 | Peptidyl Arginine Deiminase 4 | Protein Coding | 44 | GC01P017308 | 2.24 |
| RAP1B | RAP1B, Member Of RAS Oncogene Family | Protein Coding | 45 | GC12P068610 | 2.24 |
| KDM4B | Lysine Demethylase 4B | Protein Coding | 43 | GC19P004969 | 2.24 |
| SMYD2 | SET And MYND Domain Containing 2 | Protein Coding | 43 | GC01P214281 | 2.24 |
| RAB27B | RAB27B, Member RAS Oncogene Family | Protein Coding | 40 | GC18P054717 | 2.24 |
| COL5A2 | Collagen Type V Alpha 2 Chain | Protein Coding | 41 | GC02M189031 | 2.24 |
| FMNL2 | Formin Like 2 | Protein Coding | 37 | GC02P152335 | 2.24 |
| HYAL2 | Hyaluronidase 2 | Protein Coding | 41 | GC03M050317 | 2.24 |
| EMX2 | Empty Spiracles Homeobox 2 | Protein Coding | 43 | GC10P117542 | 2.24 |
| CDK14 | Cyclin Dependent Kinase 14 | Protein Coding | 40 | GC07P090471 | 2.24 |
| SCP2 | Sterol Carrier Protein 2 | Protein Coding | 47 | GC01P052927 | 2.24 |
| KLF2 | Kruppel Like Factor 2 | Protein Coding | 40 | GC19P023268 | 2.24 |
| HELQ | Helicase, POLQ Like | Protein Coding | 36 | GC04M083407 | 2.24 |
| TRAPPC4 | Trafficking Protein Particle Complex 4 | Protein Coding | 39 | GC11P119018 | 2.24 |
| CGB7 | Chorionic Gonadotropin Subunit Beta 7 | Protein Coding | 30 | GC19M049054 | 2.23 |
| AGPS | Alkylglycerone Phosphate Synthase | Protein Coding | 43 | GC02P177392 | 2.23 |
| RNLS | Renalase, FAD Dependent Amine Oxidase | Protein Coding | 38 | GC10M088180 | 2.23 |
| ATP1A1 | ATPase Na+/K+ Transporting Subunit Alpha 1 | Protein Coding | 49 | GC01P116372 | 2.23 |
| CLCA4 | Chloride Channel Accessory 4 | Protein Coding | 38 | GC01P086547 | 2.23 |
| UTS2R | Urotensin 2 Receptor | Protein Coding | 41 | GC17P082374 | 2.23 |
| ATAD3B | ATPase Family AAA Domain Containing 3B | Protein Coding | 36 | GC01P001527 | 2.23 |
| PGM5-AS1 | PGM5 Antisense RNA 1 | RNA Gene | 14 | GC09M068355 | 2.23 |
| ITGA7 | Integrin Subunit Alpha 7 | Protein Coding | 47 | GC12M055684 | 2.23 |
| EFTUD2 | Elongation Factor Tu GTP Binding Domain Containing 2 | Protein Coding | 42 | GC17M044852 | 2.23 |
| PKLR | Pyruvate Kinase L/R | Protein Coding | 47 | GC01M155289 | 2.23 |
| PIWIL2 | Piwi Like RNA-Mediated Gene Silencing 2 | Protein Coding | 37 | GC08P022275 | 2.23 |
| COL19A1 | Collagen Type XIX Alpha 1 Chain | Protein Coding | 37 | GC06P069866 | 2.23 |
| ARHGEF10 | Rho Guanine Nucleotide Exchange Factor 10 | Protein Coding | 43 | GC08P001823 | 2.23 |
| DGCR8 | DGCR8 Microprocessor Complex Subunit | Protein Coding | 40 | GC22P020080 | 2.23 |
| NEDD4L | NEDD4 Like E3 Ubiquitin Protein Ligase | Protein Coding | 46 | GC18P058044 | 2.23 |
| H4C9 | H4 Clustered Histone 9 | Protein Coding | 31 | GC06P028910 | 2.23 |
| ATG12 | Autophagy Related 12 | Protein Coding | 41 | GC05M115828 | 2.23 |
| CLIP1 | CAP-Gly Domain Containing Linker Protein 1 | Protein Coding | 44 | GC12M122271 | 2.23 |
| PYGO2 | Pygopus Family PHD Finger 2 | Protein Coding | 37 | GC01M154957 | 2.23 |
| H2AC21 | H2A Clustered Histone 21 | Protein Coding | 27 | GC01M149970 | 2.23 |
| RAB1A | RAB1A, Member RAS Oncogene Family | Protein Coding | 41 | GC02M065048 | 2.23 |
| F11R | F11 Receptor | Protein Coding | 43 | GC01M160995 | 2.22 |
| HIF1AN | Hypoxia Inducible Factor 1 Subunit Alpha Inhibitor | Protein Coding | 44 | GC10P100529 | 2.22 |
| HOXA4 | Homeobox A4 | Protein Coding | 39 | GC07M027128 | 2.22 |
| PNPLA6 | Patatin Like Phospholipase Domain Containing 6 | Protein Coding | 44 | GC19P007534 | 2.22 |
| PPP1R12C | Protein Phosphatase 1 Regulatory Subunit 12C | Protein Coding | 36 | GC19M055110 | 2.22 |
| ANGPTL2 | Angiopoietin Like 2 | Protein Coding | 36 | GC09M127087 | 2.22 |
| MT1G | Metallothionein 1G | Protein Coding | 35 | GC16M056666 | 2.22 |
| ZGPAT | Zinc Finger CCCH-Type And G-Patch Domain Containing | Protein Coding | 37 | GC20P063707 | 2.21 |
| USP14 | Ubiquitin Specific Peptidase 14 | Protein Coding | 45 | GC18P000158 | 2.21 |
| LOC110806262 | Solute Carrier Family 6 Member 4 Gene Promoter | Biological Region | 1 | GC17P030235 | 2.21 |
| ADCY10 | Adenylate Cyclase 10 | Protein Coding | 45 | GC01M167809 | 2.21 |
| GRIA1 | Glutamate Ionotropic Receptor AMPA Type Subunit 1 | Protein Coding | 48 | GC05P153467 | 2.21 |
| KCNB1 | Potassium Voltage-Gated Channel Subfamily B Member 1 | Protein Coding | 47 | GC20M049293 | 2.21 |
| PGBD3 | PiggyBac Transposable Element Derived 3 | Protein Coding | 27 | GC10M049517 | 2.21 |
| AQP8 | Aquaporin 8 | Protein Coding | 37 | GC16P026377 | 2.21 |
| TM4SF5 | Transmembrane 4 L Six Family Member 5 | Protein Coding | 34 | GC17P004771 | 2.21 |
| HGFAC | HGF Activator | Protein Coding | 40 | GC04P003443 | 2.21 |
| GRIN1 | Glutamate Ionotropic Receptor NMDA Type Subunit 1 | Protein Coding | 49 | GC09P137138 | 2.21 |
| CHIT1 | Chitinase 1 | Protein Coding | 43 | GC01M203181 | 2.21 |
| TRPM7 | Transient Receptor Potential Cation Channel Subfamily M Member 7 | Protein Coding | 45 | GC15M050552 | 2.21 |
| PSMC4 | Proteasome 26S Subunit, ATPase 4 | Protein Coding | 40 | GC19P039972 | 2.21 |
| HES5 | Hes Family BHLH Transcription Factor 5 | Protein Coding | 34 | GC01M002528 | 2.21 |
| LBP | Lipopolysaccharide Binding Protein | Protein Coding | 44 | GC20P038346 | 2.21 |
| DLL3 | Delta Like Canonical Notch Ligand 3 | Protein Coding | 41 | GC19P039498 | 2.21 |
| MAPRE3 | Microtubule Associated Protein RP/EB Family Member 3 | Protein Coding | 39 | GC02P026935 | 2.21 |
| GRHL3 | Grainyhead Like Transcription Factor 3 | Protein Coding | 38 | GC01P024319 | 2.21 |
| SLC34A2 | Solute Carrier Family 34 Member 2 | Protein Coding | 45 | GC04P025657 | 2.2 |
| KIF2C | Kinesin Family Member 2C | Protein Coding | 43 | GC01P044739 | 2.2 |
| CT47A7 | Cancer/Testis Antigen Family 47 Member A7 | Protein Coding | 20 | GC0XM120953 | 2.2 |
| CT47A8 | Cancer/Testis Antigen Family 47 Member A8 | Protein Coding | 19 | GC0XM120956 | 2.2 |
| CT47A9 | Cancer/Testis Antigen Family 47 Member A9 | Protein Coding | 19 | GC0XM120943 | 2.2 |
| CRHR1 | Corticotropin Releasing Hormone Receptor 1 | Protein Coding | 45 | GC17P045784 | 2.2 |
| BAALC | BAALC Binder Of MAP3K1 And KLF4 | Protein Coding | 36 | GC08P103141 | 2.2 |
| ALOXE3 | Arachidonate Lipoxygenase 3 | Protein Coding | 41 | GC17M008849 | 2.2 |
| ARFRP1 | ADP Ribosylation Factor Related Protein 1 | Protein Coding | 37 | GC20M063698 | 2.2 |
| OIP5 | Opa Interacting Protein 5 | Protein Coding | 34 | GC15M041309 | 2.2 |
| NSMCE2 | NSE2 (MMS21) Homolog, SMC5-SMC6 Complex SUMO Ligase | Protein Coding | 39 | GC08P125091 | 2.2 |
| TTF2 | Transcription Termination Factor 2 | Protein Coding | 39 | GC01P117060 | 2.2 |
| NOD1 | Nucleotide Binding Oligomerization Domain Containing 1 | Protein Coding | 44 | GC07M030424 | 2.2 |
| LGALS2 | Galectin 2 | Protein Coding | 41 | GC22M037570 | 2.2 |
| WDR5 | WD Repeat Domain 5 | Protein Coding | 44 | GC09P134135 | 2.19 |
| MIR138-2 | MicroRNA 138-2 | RNA Gene | 20 | GC16P056859 | 2.19 |
| TNXB | Tenascin XB | Protein Coding | 43 | GC06M032635 | 2.19 |
| PTPN2 | Protein Tyrosine Phosphatase Non-Receptor Type 2 | Protein Coding | 46 | GC18M017325 | 2.19 |
| BCAM | Basal Cell Adhesion Molecule (Lutheran Blood Group) | Protein Coding | 40 | GC19P044810 | 2.19 |
| MIR1185-1 | MicroRNA 1185-1 | RNA Gene | 16 | GC14P104774 | 2.19 |
| EHHADH | Enoyl-CoA Hydratase And 3-Hydroxyacyl CoA Dehydrogenase | Protein Coding | 44 | GC03M185190 | 2.19 |
| SLC12A4 | Solute Carrier Family 12 Member 4 | Protein Coding | 43 | GC16M067944 | 2.19 |
| HSPE1 | Heat Shock Protein Family E (Hsp10) Member 1 | Protein Coding | 40 | GC02P197501 | 2.19 |
| BRD3 | Bromodomain Containing 3 | Protein Coding | 41 | GC09M134030 | 2.19 |
| DEFA3 | Defensin Alpha 3 | Protein Coding | 36 | GC08M007015 | 2.19 |
| PURG | Purine Rich Element Binding Protein G | Protein Coding | 34 | GC08M030995 | 2.19 |
| ECHS1 | Enoyl-CoA Hydratase, Short Chain 1 | Protein Coding | 47 | GC10M133362 | 2.19 |
| CEBPD | CCAAT Enhancer Binding Protein Delta | Protein Coding | 38 | GC08M047759 | 2.19 |
| ADAMTS4 | ADAM Metallopeptidase With Thrombospondin Type 1 Motif 4 | Protein Coding | 42 | GC01M161184 | 2.19 |
| RAP2A | RAP2A, Member Of RAS Oncogene Family | Protein Coding | 40 | GC13P097436 | 2.19 |
| SPG11 | SPG11 Vesicle Trafficking Associated, Spatacsin | Protein Coding | 39 | GC15M044562 | 2.19 |
| RNF111 | Ring Finger Protein 111 | Protein Coding | 37 | GC15P058866 | 2.19 |
| LONRF1 | LON Peptidase N-Terminal Domain And Ring Finger 1 | Protein Coding | 34 | GC08M012721 | 2.19 |
| B3GAT1 | Beta-1,3-Glucuronyltransferase 1 | Protein Coding | 43 | GC11M134378 | 2.19 |
| SLC35A2 | Solute Carrier Family 35 Member A2 | Protein Coding | 40 | GC0XM048903 | 2.19 |
| ALDH1A3 | Aldehyde Dehydrogenase 1 Family Member A3 | Protein Coding | 45 | GC15P100877 | 2.19 |
| CFL2 | Cofilin 2 | Protein Coding | 44 | GC14M034706 | 2.18 |
| KRT83 | Keratin 83 | Protein Coding | 38 | GC12M052314 | 2.18 |
| ALDH3A1 | Aldehyde Dehydrogenase 3 Family Member A1 | Protein Coding | 44 | GC17M019737 | 2.18 |
| MAL | Mal, T Cell Differentiation Protein | Protein Coding | 37 | GC02P095025 | 2.18 |
| HBP1 | HMG-Box Transcription Factor 1 | Protein Coding | 38 | GC07P107168 | 2.18 |
| TRAF5 | TNF Receptor Associated Factor 5 | Protein Coding | 42 | GC01P211326 | 2.18 |
| ACKR2 | Atypical Chemokine Receptor 2 | Protein Coding | 37 | GC03P042804 | 2.18 |
| VPS52 | VPS52 Subunit Of GARP Complex | Protein Coding | 36 | GC06M033251 | 2.18 |
| MIR619 | MicroRNA 619 | RNA Gene | 14 | GC12M108836 | 2.18 |
| SIK2 | Salt Inducible Kinase 2 | Protein Coding | 45 | GC11P111605 | 2.18 |
| CLDN11 | Claudin 11 | Protein Coding | 40 | GC03P170418 | 2.18 |
| ACSL3 | Acyl-CoA Synthetase Long Chain Family Member 3 | Protein Coding | 40 | GC02P222860 | 2.18 |
| SIM2 | SIM BHLH Transcription Factor 2 | Protein Coding | 38 | GC21P036699 | 2.17 |
| PPP1R15A | Protein Phosphatase 1 Regulatory Subunit 15A | Protein Coding | 40 | GC19P048872 | 2.17 |
| ARF1 | ADP Ribosylation Factor 1 | Protein Coding | 46 | GC01P228082 | 2.17 |
| COPS3 | COP9 Signalosome Subunit 3 | Protein Coding | 39 | GC17M017246 | 2.17 |
| VPS9D1-AS1 | VPS9D1 Antisense RNA 1 | RNA Gene | 14 | GC16P089711 | 2.17 |
| CALB1 | Calbindin 1 | Protein Coding | 41 | GC08M090058 | 2.17 |
| DLG5 | Discs Large MAGUK Scaffold Protein 5 | Protein Coding | 38 | GC10M077790 | 2.17 |
| RIPK2 | Receptor Interacting Serine/Threonine Kinase 2 | Protein Coding | 46 | GC08P089758 | 2.17 |
| RFX1 | Regulatory Factor X1 | Protein Coding | 38 | GC19M013961 | 2.17 |
| NAA40 | N-Alpha-Acetyltransferase 40, NatD Catalytic Subunit | Protein Coding | 34 | GC11P063938 | 2.17 |
| H3C14 | H3 Clustered Histone 14 | Protein Coding | 29 | GC01M149963 | 2.17 |
| UGT1A8 | UDP Glucuronosyltransferase Family 1 Member A8 | Protein Coding | 35 | GC02P233618 | 2.17 |
| NANOGP8 | Nanog Homeobox Retrogene P8 | Protein Coding | 22 | GC15M035083 | 2.17 |
| PIP5K1C | Phosphatidylinositol-4-Phosphate 5-Kinase Type 1 Gamma | Protein Coding | 48 | GC19M003631 | 2.17 |
| EYS | Eyes Shut Homolog | Protein Coding | 36 | GC06M063719 | 2.17 |
| SORT1 | Sortilin 1 | Protein Coding | 43 | GC01M109310 | 2.16 |
| SEMA3E | Semaphorin 3E | Protein Coding | 41 | GC07M083363 | 2.16 |
| POLR2F | RNA Polymerase II, I And III Subunit F | Protein Coding | 40 | GC22P037952 | 2.16 |
| CT47A5 | Cancer/Testis Antigen Family 47 Member A5 | Protein Coding | 21 | GC0XM120963 | 2.16 |
| RFXANK | Regulatory Factor X Associated Ankyrin Containing Protein | Protein Coding | 42 | GC19P019192 | 2.16 |
| PIR | Pirin | Protein Coding | 39 | GC0XM015402 | 2.16 |
| POLI | DNA Polymerase Iota | Protein Coding | 41 | GC18P054274 | 2.16 |
| CPT1A | Carnitine Palmitoyltransferase 1A | Protein Coding | 48 | GC11M068754 | 2.16 |
| C5orf66 | Chromosome 5 Open Reading Frame 66 | RNA Gene | 20 | GC05P135033 | 2.16 |
| PTMA | Prothymosin Alpha | Protein Coding | 39 | GC02P231707 | 2.16 |
| E2F8 | E2F Transcription Factor 8 | Protein Coding | 35 | GC11M019203 | 2.16 |
| SOX21 | SRY-Box Transcription Factor 21 | Protein Coding | 37 | GC13M094709 | 2.16 |
| BCDIN3D | BCDIN3 Domain Containing RNA Methyltransferase | Protein Coding | 35 | GC12M049839 | 2.16 |
| GPBAR1 | G Protein-Coupled Bile Acid Receptor 1 | Protein Coding | 39 | GC02P218259 | 2.16 |
| ONECUT1 | One Cut Homeobox 1 | Protein Coding | 40 | GC15M060601 | 2.16 |
| DNAJA1 | DnaJ Heat Shock Protein Family (Hsp40) Member A1 | Protein Coding | 41 | GC09P033025 | 2.15 |
| KPNA5 | Karyopherin Subunit Alpha 5 | Protein Coding | 39 | GC06P116681 | 2.15 |
| LPCAT1 | Lysophosphatidylcholine Acyltransferase 1 | Protein Coding | 36 | GC05M001456 | 2.15 |
| RAD9A | RAD9 Checkpoint Clamp Component A | Protein Coding | 40 | GC11P067318 | 2.15 |
| MEAF6 | MYST/Esa1 Associated Factor 6 | Protein Coding | 35 | GC01M037489 | 2.15 |
| MTMR3 | Myotubularin Related Protein 3 | Protein Coding | 42 | GC22P029885 | 2.15 |
| COL15A1 | Collagen Type XV Alpha 1 Chain | Protein Coding | 38 | GC09P098943 | 2.15 |
| NOTUM | Notum, Palmitoleoyl-Protein Carboxylesterase | Protein Coding | 36 | GC17M081952 | 2.15 |
| CDH4 | Cadherin 4 | Protein Coding | 41 | GC20P061252 | 2.15 |
| MMP21 | Matrix Metallopeptidase 21 | Protein Coding | 40 | GC10M125766 | 2.15 |
| WDR19 | WD Repeat Domain 19 | Protein Coding | 38 | GC04P039184 | 2.15 |
| MYEOV | Myeloma Overexpressed | Protein Coding | 30 | GC11P069295 | 2.15 |
| ACO2 | Aconitase 2 | Protein Coding | 46 | GC22P041469 | 2.14 |
| ESRP1 | Epithelial Splicing Regulatory Protein 1 | Protein Coding | 37 | GC08P094641 | 2.14 |
| MAPKAPK5 | MAPK Activated Protein Kinase 5 | Protein Coding | 44 | GC12P111842 | 2.14 |
| HSPA12A | Heat Shock Protein Family A (Hsp70) Member 12A | Protein Coding | 37 | GC10M116671 | 2.14 |
| NAT10 | N-Acetyltransferase 10 | Protein Coding | 39 | GC11P034105 | 2.14 |
| CHM | CHM Rab Escort Protein | Protein Coding | 39 | GC0XM085861 | 2.14 |
| MASP2 | Mannan Binding Lectin Serine Peptidase 2 | Protein Coding | 44 | GC01M011026 | 2.14 |
| NELFA | Negative Elongation Factor Complex Member A | Protein Coding | 36 | GC04M001985 | 2.14 |
| GABARAPL2 | GABA Type A Receptor Associated Protein Like 2 | Protein Coding | 44 | GC16P075566 | 2.14 |
| PARVA | Parvin Alpha | Protein Coding | 44 | GC11P012398 | 2.14 |
| RSAD2 | Radical S-Adenosyl Methionine Domain Containing 2 | Protein Coding | 40 | GC02P006865 | 2.14 |
| PEX12 | Peroxisomal Biogenesis Factor 12 | Protein Coding | 39 | GC17M035574 | 2.14 |
| SLC17A9 | Solute Carrier Family 17 Member 9 | Protein Coding | 39 | GC20P062952 | 2.13 |
| MIR760 | MicroRNA 760 | RNA Gene | 18 | GC01P093846 | 2.13 |
| CABLES2 | Cdk5 And Abl Enzyme Substrate 2 | Protein Coding | 34 | GC20M062388 | 2.13 |
| NBPF2P | NBPF Member 2, Pseudogene | Pseudogene | 10 | GC01M021423 | 2.13 |
| PANTR1 | POU3F3 Adjacent Non-Coding Transcript 1 | RNA Gene | 13 | GC02M104806 | 2.13 |
| PHC3 | Polyhomeotic Homolog 3 | Protein Coding | 38 | GC03M170086 | 2.13 |
| SRGAP3 | SLIT-ROBO Rho GTPase Activating Protein 3 | Protein Coding | 41 | GC03M008980 | 2.13 |
| MT-TL2 | Mitochondrially Encoded TRNA-Leu (CUN) 2 | RNA Gene | 13 | GCMTP012268 | 2.13 |
| POLR3A | RNA Polymerase III Subunit A | Protein Coding | 43 | GC10M077969 | 2.13 |
| MIR194-2 | MicroRNA 194-2 | RNA Gene | 19 | GC11M064954 | 2.13 |
| PPP1R12A | Protein Phosphatase 1 Regulatory Subunit 12A | Protein Coding | 42 | GC12M079773 | 2.13 |
| AMD1 | Adenosylmethionine Decarboxylase 1 | Protein Coding | 43 | GC06P110814 | 2.13 |
| MIIP | Migration And Invasion Inhibitory Protein | Protein Coding | 35 | GC01P012019 | 2.13 |
| HSD17B4 | Hydroxysteroid 17-Beta Dehydrogenase 4 | Protein Coding | 46 | GC05P119452 | 2.13 |
| NCK1 | NCK Adaptor Protein 1 | Protein Coding | 45 | GC03P136862 | 2.13 |
| ENC1 | Ectodermal-Neural Cortex 1 | Protein Coding | 37 | GC05M074627 | 2.13 |
| DUT | Deoxyuridine Triphosphatase | Protein Coding | 42 | GC15P048331 | 2.13 |
| USP44 | Ubiquitin Specific Peptidase 44 | Protein Coding | 38 | GC12M095516 | 2.13 |
| SENP7 | SUMO Specific Peptidase 7 | Protein Coding | 36 | GC03M101324 | 2.12 |
| ADORA2B | Adenosine A2b Receptor | Protein Coding | 47 | GC17P015927 | 2.12 |
| RPL10A | Ribosomal Protein L10a | Protein Coding | 41 | GC06P047437 | 2.12 |
| PPM1H | Protein Phosphatase, Mg2+/Mn2+ Dependent 1H | Protein Coding | 36 | GC12M062643 | 2.12 |
| PSME3 | Proteasome Activator Subunit 3 | Protein Coding | 41 | GC17P042824 | 2.12 |
| CALM3 | Calmodulin 3 | Protein Coding | 42 | GC19P046601 | 2.12 |
| INA | Internexin Neuronal Intermediate Filament Protein Alpha | Protein Coding | 39 | GC10P103277 | 2.12 |
| RNF26 | Ring Finger Protein 26 | Protein Coding | 34 | GC11P119334 | 2.12 |
| SIGLEC5 | Sialic Acid Binding Ig Like Lectin 5 | Protein Coding | 37 | GC19M051611 | 2.12 |
| SLC39A14 | Solute Carrier Family 39 Member 14 | Protein Coding | 43 | GC08P022367 | 2.12 |
| ADAMTS5 | ADAM Metallopeptidase With Thrombospondin Type 1 Motif 5 | Protein Coding | 42 | GC21M026918 | 2.12 |
| EGFL7 | EGF Like Domain Multiple 7 | Protein Coding | 39 | GC09P136658 | 2.12 |
| HSPA1B | Heat Shock Protein Family A (Hsp70) Member 1B | Protein Coding | 40 | GC06P047325 | 2.12 |
| ATG14 | Autophagy Related 14 | Protein Coding | 36 | GC14M055366 | 2.12 |
| ILF3 | Interleukin Enhancer Binding Factor 3 | Protein Coding | 38 | GC19P010625 | 2.12 |
| XIRP1 | Xin Actin Binding Repeat Containing 1 | Protein Coding | 35 | GC03M039200 | 2.11 |
| SEMA5B | Semaphorin 5B | Protein Coding | 39 | GC03M122909 | 2.11 |
| RPL29 | Ribosomal Protein L29 | Protein Coding | 38 | GC03M052005 | 2.11 |
| TARBP2 | TARBP2 Subunit Of RISC Loading Complex | Protein Coding | 41 | GC12P053499 | 2.11 |
| ATP1B1 | ATPase Na+/K+ Transporting Subunit Beta 1 | Protein Coding | 47 | GC01P169105 | 2.11 |
| CA3-AS1 | CA3 Antisense RNA 1 | RNA Gene | 12 | GC08M085442 | 2.11 |
| GM2A | GM2 Ganglioside Activator | Protein Coding | 43 | GC05P151229 | 2.11 |
| H4C6 | H4 Clustered Histone 6 | Protein Coding | 29 | GC06P028909 | 2.11 |
| GNAI1 | G Protein Subunit Alpha I1 | Protein Coding | 46 | GC07P079769 | 2.11 |
| UBE2K | Ubiquitin Conjugating Enzyme E2 K | Protein Coding | 41 | GC04P039700 | 2.11 |
| GUCY2F | Guanylate Cyclase 2F, Retinal | Protein Coding | 37 | GC0XM109372 | 2.11 |
| AKR7L | Aldo-Keto Reductase Family 7 Like (Gene/Pseudogene) | Protein Coding | 28 | GC01M019265 | 2.1 |
[truncated: 454,167 more chars]
